# Supplementary material for: Clustering analysis for classifying fake real estate listings
Source: PeerJ Comput Sci. 2024 Jun 20;10:e2019. doi: 10.7717/peerj-cs.2019 (PMC11232574; doi:10.7717/peerj-cs.2019)
Supplement: Supplemental Information 1 [file peerj-cs-10-2019-s001.xlsx]

## Sheet: durianprop_sale_prepared_202110
Price	Built_Up_SF	Bathroom	Furnishing	Bedroom	Tenure	Car_Park	Agent_Code	Agent_Name	URL	Desc	Date	Place	Area	Source	Property_Type	Property_Address	Occupancy	Title	Facing	Unit_Type	Land_Size	Land_D1	Land_D2	Price_PSFLand	Poscode	Views	src
600000	1400	4	Partly Furnished	5	Leasehold	na	REN No.: 18589	Shahrizal Shahrir	https://www.durianproperty.com.my/classified/3014190/Taman-Sri-Kenari-Terrace-House-for-sale-by-shahrizal-shahrir	Tell shahrizal shahrir you saw this ad from DurianProperty to get best deal.(CANTIK/FULLY RENO) TERES 2.5 TINGKAT(selepas reno), Taman Sri Kenari, Kajang (facing open space) Type of property: Teres 2 tingkat (2.5tingkat selepas reno) Status: Leasehol+bumilot Land area :20 x 70 rooms : 4 + 1 bathrooms : 4 ====================== HARGA JUAL : RM600K Nett ====================== RENOVATION COST : 150k…	2021-10-11	Taman Sri Kenari	Kajang	Durian	Terrace House	Taman Sri Kenari, Kajang - Terrace House For Sale	na	-1	-1	na	1400	-1	-1	428.571	-1	-1	https://cdn.durianproperty.com.my/images/classified_ads/301419011786451.jpg			#NAME?
420000	1365	3	Partly Furnished	4	Freehold	na	REN No.: 39721	Md Razif Bin Mohd Salim	https://www.durianproperty.com.my/classified/3009292/Taman-Sentosa-Terrace-House-for-sale-by-MD-RAZIF-BIN-MOHD-SALIM	Tell MD RAZIF BIN MOHD SALIM you saw this ad from DurianProperty to get best deal.WTS : DOUBLE STOREY TERRACE, TAMAN SENTOSA, JALAN HULUBALANG, KLANG SELANGOR ======================= Asking Price : RM420,000 Nego ======================= DETAILS : Freehold / Non Bumi Lot Bedrooms : 4 Bathroom : 3 Land area : 18 x 65 Build Up size : t. Extended Kitchen Table Top / Kitchen Cabinet Awning Fully Cover…	2021-10-11	Taman Sentosa	Klang	Durian	Terrace House	Taman Sentosa, Klang - Terrace House For Sale	Owner Occupied	-1	-1	Intermediate Lot	1170	-1	-1	358.974	-1	-1	https://cdn.durianproperty.com.my/images/classified_ads/300929211751277.jpg
620000	1800	3	Partly Furnished	4	Leasehold	na	REN No.: 44089	Rafedah Abdul Aziz	https://www.durianproperty.com.my/classified/3035318/Bandar-Pinggiran-Subang-Terrace-House-for-sale-by-RAFEDAH-ABDUL-AZIZ	Tell RAFEDAH ABDUL AZIZ you saw this ad from DurianProperty to get best deal.Double Storey Bandar Pinggiran Subang, Seksyen U5 Shah Alam ================= Selling Price : RM610,000 ================= Details: - Double Storey Terrace House - Leasehold non bumi - Size : 1400 sqft - Built up : 1800 sqft - 4 Bedrooms - 3 Bathrooms - 1 Kitchen, Living and Dining - Renovation *Automatic Door At The Main…	2021-10-11	Bandar Pinggiran Subang	Shah Alam	Durian	Terrace House	Bandar Pinggiran Subang, Shah Alam - Terrace House For Sale	na	-1	-1	na	1400	-1	-1	442.857	-1	-1	https://cdn.durianproperty.com.my/images/classified_ads/303531811934793.jpg
2800000	6500	5+	Fully Furnished	7	Freehold	na	REN No.: 15525	Jimmy Goh	https://www.durianproperty.com.my/classified/2908073/Pusat-Bandar-Rawang-Bungalow-House-for-sale-by-Jimmy-Goh	Tell Jimmy Goh you saw this ad from DurianProperty to get best deal.2.5 Sty Bungalow House Taman Sri Hijau, Rawang Ples Contact Jimmy Goh 012-202 9977 for listing (Q 2119) @ Land Area: 10,900 sf @ Built Up 6,500 sf @ Freehold @ 7 Room 6 Bathroom @ Fish Pond Near by: - Kundang Jaya - Kawasan Perindustrian Kundang - Bandar Baru Kundang - Bandar Country Homes - Bandar Tasik Puteri - Kampung Baru Kun…	2021-10-11	Pusat Bandar Rawang	Rawang	Durian	Bungalow House	Pusat Bandar Rawang, Rawang - Bungalow House For Sale	Vacant	-1	-1	Intermediate Lot	10900	-1	-1	256.881	-1	-1	https://cdn.durianproperty.com.my/images/classified_ads/290807311108434.jpg
430000	920	2	Partly Furnished	3	Freehold	1	na	Sia Yiik Luk	https://www.durianproperty.com.my/classified/3044204/Angkasa-Condominiums-Condo-for-sale-by-Sia-Yiik-Luk	Tell Sia Yiik Luk you saw this ad from DurianProperty to get best deal.Angkasa Condominiums, Cheras. >3-bedroom W 2-bathroom >920 sf each unit. >tenanted especially to the UCSI students. >neighbors Giant Hypermarket Taman Connaught & University College International Sedaya. >It enjoys the nearest distance to University College International Sedaya. >Other from UCSI, there are a few school located…	2021-10-11	Angkasa Condominiums	Cheras	Durian	Condo	Angkasa Condominiums, Cheras - Condo For Sale	Tenanted	-1	-1	Intermediate Lot	-1	-1	-1	-1	-1	-1	https://cdn.durianproperty.com.my/images/classified_ads/304420411998529.jpg
292000	600	1	Partly Furnished	2	Leasehold	2	REN No.: 22296	Alvin Lau	https://www.durianproperty.com.my/classified/3014413/Residensi-Ostia-Condo-for-sale-by-Alvin-Lau	Tell Alvin Lau you saw this ad from DurianProperty to get best deal.Dah bertahun tahun kerja tapi belum ada rumah sendiri ? Penat menyewa sahaja ? Biasa rumah di KL harga mahal Kena ada deposit 10% Mana nak dapat duit banyak tu... Jangan risau……. Saya faham dengan situasi anda Jom saya bantu dapatkan harga rumah murah ❗️ Di Bangi @ KL South dengan hanya RM500‼️ Dengan hanya RM500. Anda dah boleh …	2021-10-11	Residensi Ostia	Bangi	Durian	Condo	Residensi Ostia, Bangi - Condo For Sale	Vacant	-1	-1	Intermediate Lot	-1	-1	-1	-1	-1	-1	https://cdn.durianproperty.com.my/images/classified_ads/301441311788420.jpg
470000	1694	na	Fully Furnished	na	Leasehold	na	REN No.: 15811	Junaidi Bin Mat Alham	https://www.durianproperty.com.my/classified/3037428/Dataran-Otomobil-Office-for-sale-by-Junaidi-Bin-Mat-Alham	Tell Junaidi Bin Mat Alham you saw this ad from DurianProperty to get best deal.[Renovated Unit] 1st Floor Retail-Office, Dataran Otomobil Seksyen 15, Shah Alam RENOVATED From 2 Unit Combine To One Unit * Front & Back Details: > Build Up 1694sqft > 4 Toilet > 1 Meeting Room > 4 Manager Room > 1 Pantry Room > Leasehold > Bumi Lot Facilities: > Bank > Restaurant & Bistro > 7 Eleven > Shop > Hyperma…	2021-10-11	Dataran Otomobil	Shah Alam	Durian	Office	Dataran Otomobil, Shah Alam - Office For Sale	Tenanted	-1	-1	End Lot	-1	-1	-1	-1	-1	-1	https://cdn.durianproperty.com.my/images/classified_ads/303742811948820.jpg
195000	650	2	Unfurnished	3	Leasehold	1	REN No.: 26633	Halisa Bashri	https://www.durianproperty.com.my/classified/3029099/Desa-Mentari-Apartment-for-sale-by-HALISA-BASHRI	Tell HALISA BASHRI you saw this ad from DurianProperty to get best deal.DESA MENTARI FLAT LOWCOST BLOK 5 @ PETALING JAYA ================================== ASKING PRICE: RM 195,000 (Negotiable) Contact: HALISA0192005509 ================================== PROPERTY DETAILS: ============== ** Lowcost Apartment/Flat ** Non Bumi Lot ** 650 sqft ** 3 Bedrooms ** 2 Bathrooms ** Level 7 (lift) ** Strata …	2021-10-11	Desa Mentari	Petaling Jaya	Durian	Apartment	Desa Mentari, Petaling Jaya - Apartment For Sale	na	-1	-1	na	-1	-1	-1	-1	-1	-1	https://cdn.durianproperty.com.my/images/classified_ads/302909911893452.jpg
1680000	3000	na	na	na	Leasehold	na	REN No.: 49891	Vincent Tan	https://www.durianproperty.com.my/classified/3035760/Kuala-Lumpur-Terrace-Factory-for-sale-by-Vincent-Tan	Tell Vincent Tan you saw this ad from DurianProperty to get best deal.The Parc Factory Outlets Prime Location @ Sri Rampai, Setapak, KL Tenure : Leasehold Premises : 2- storey factory/warehouse Built up : 3000 Land area : 1625 sq ft Ceiling Height: Ground floor 16 ft / 1st Floor 13 ft Asking : RM1,680,000 ( Negotiable) Selling with tenancy : One tenant occupying ground & upstairs. Total rental : …	2021-10-11	Kuala Lumpur	Malaysia	Durian	Factory	Kuala Lumpur, Malaysia - Terrace Factory For Sale	Tenanted	-1	-1	Intermediate Lot	1625	-1	-1	1033.85	-1	-1	https://cdn.durianproperty.com.my/images/classified_ads/303576011937719.jpg
498000	1100	3	Partly Furnished	4	Freehold	2	REN No.: 29246	Johnny Khoo	https://www.durianproperty.com.my/classified/3038871/Taman-Puchong-Utama-Terrace-House-for-sale-by-Johnny-Khoo	Tell Johnny Khoo you saw this ad from DurianProperty to get best deal.2 Sty House Renovated, Cosy House For A Family * Land size : 18' x 60' sqft * Renovated Kitchen * Kitchen table top & cabinets * Air Conditioning * Ceiling Fans * Built in Cabinets * Surrounding with banks, restaurants, school & etc... * Must view to appreciate! * Please call Johnny 011-2326 8012 for viewing. ***OWNERS ARE WELC…	2021-10-11	Taman Puchong Utama	Puchong	Durian	Terrace House	Taman Puchong Utama, Puchong - Terrace House For Sale	Vacant	-1	-1	Intermediate Lot	1080	-1	-1	461.111	-1	-1	https://cdn.durianproperty.com.my/images/classified_ads/303887111958926.JPEG
340000	1004	2	Unfurnished	3	Leasehold	2	REN No.: 32928	Ms. Yasmin	https://www.durianproperty.com.my/classified/3047970/Bsp-Skypark-Condo-for-sale-by-Ms-Yasmin	Tell Ms. Yasmin you saw this ad from DurianProperty to get best deal.For Sale - BSP Skypark Condominium, Bdr Saujana Putra, Selangor. =================== . DETAILS : ----------- -Leasehold, Bumi Lot -Tower 1, Level 8 -Build Up : 1004 sqft -Bedrooms : 3 -Bathrooms : 2 -Balcony -2 Carpark . FACILITIES : ------------- -24 Hours Security -Swimming Pool -Surau (Male & Female) -Jacuzzi -Playground -Caf…	2021-10-11	Bsp Skypark	Bandar Saujana Putra	Durian	Condo	Bsp Skypark, Bandar Saujana Putra - Condo For Sale	na	-1	-1	na	-1	-1	-1	-1	-1	-1	https://cdn.durianproperty.com.my/images/classified_ads/304797012021872.jpg
499000	1200	2	Partly Furnished	3	na	2	REN No.: 27392	Janice Loo	https://www.durianproperty.com.my/classified/3043121/Solaris-Dutamas-Condo-for-sale-by-Janice-Loo	Tell Janice Loo you saw this ad from DurianProperty to get best deal.Feel Free To Call In or Pm In For Limited Unit & Package : Janice Loo - 017-3715988 . Semi-D Type luxury Condominium Details: * Branded Developer * Shuttle bus direct to Pavillion KL( 4km ) * Pricing from RM499k * KL zone 1 location * RM650/PSF * 858-1618sqf ( 4 type layout ) suite different type buyer * 3 tier security * Non Bu…	2021-10-11	Solaris Dutamas	Dutamas	Durian	Condo	Solaris Dutamas, Dutamas - Condo For Sale	na	-1	-1	na	-1	-1	-1	-1	-1	-1	https://cdn.durianproperty.com.my/images/classified_ads/304312111990754.jpg
750000	729	2	Fully Furnished	2	Freehold	1	na	Ray Oh	https://www.durianproperty.com.my/classified/3037164/Verve-Suites-Condo-for-sale-by-Ray-Oh	Tell Ray Oh you saw this ad from DurianProperty to get best deal.FOR SALE VERVE SUITES KL SOUTH, JALAN KLANG LAMA (OLD KLANG ROAD), KUALA LUMPUR. ======================================== ASKING PRICE: RM 750,000 (Negotiable) ======================================== <> PROPERTY DETAILS: • Freehold (Non Bumi-Lot) • Size : 729 sq. ft.(Block A, Level 10) • 2 Bedrooms, 2 Bathrooms • 1 Carpark + 1 Stor…	2021-10-11	Verve Suites	Old Klang Road	Durian	Condo	Verve Suites, Old Klang Road - Condo For Sale	na	-1	-1	na	-1	-1	-1	-1	-1	-1	https://cdn.durianproperty.com.my/images/classified_ads/303716411946779.JPG
585000	1645	3	Fully Furnished	3 + 1	Leasehold	2	na	-1	https://www.durianproperty.com.my/classified/2996674/Armanee-Condominium-Condo-Duplex-for-sale-by-MUHAMMAD-ASHRI-BIN-NAZRI	FOR SALE: ARMANEE CONDOMINIUM (DUPLEX), DAMANSARA DAMAI . ================= ASKING PRICE: RM 585,000 ================= . DETAILS : * Type : Condominium (Duplex) * Tenure : Leasehold (Bumi Lot) * Level: 3 * Size : 1,645 sqft * Bedroom : 3+1 * Bathroom : 3 * Carpark: 2 (Covered) * Maintenance Fee: RM350 * Title: Master Title * Kitchen Cabinet & table top, 3 Air-Conditioner . FACILITIES : * 24-hour …	2021-10-11	Armanee Condominium	Damansara Damai	Durian	Condo	Armanee Condominium, Damansara Damai - Condo Duplex For Sale	Owner Occupied	-1	-1	Intermediate Lot	-1	-1	-1	-1	-1	-1	https://cdn.durianproperty.com.my/images/classified_ads/299667411668528.jpg
800000	2500	4	Unfurnished	4	Leasehold	4	REN No.: 27036	Aaron Woo	https://www.durianproperty.com.my/classified/3011618/BU12-Semi-D-for-sale-by-Aaron-Woo	Tell Aaron Woo you saw this ad from DurianProperty to get best deal.NEW HIGH_END CONCEPT TOWNSHIP [ LIMITED ] 【NO RAWANG】 【NO PUNCAK ALAM】 【YES , NEAR TO TOWN】 KINDLY CONTACT OR WhatsApp : [ 014 - 309 1429 Aaron ] FOR SHOW UNIT VISIT ARRANGEMENT & INFORMATION !!! Don't Miss Out This Run With Limited Time Offer !!! Welcome Contact For More Information !!! [ 2000 - 2300 MONTHLY INSTALLMENT ] !!! - …	2021-10-11	BU12	Bandar Utama	Durian	Semi D	BU12, Bandar Utama - Semi D For Sale	Vacant	-1	-1	Corner Lot	2450	-1	-1	326.531	-1	-1	https://cdn.durianproperty.com.my/images/classified_ads/301161811767610.PNG
2650000	6000	na	na	na	Leasehold	na	REN No.: 15525	Jimmy Goh	https://www.durianproperty.com.my/classified/2990752/Taman-Industri-Pandan-Indah-Detached-Factory-for-sale-by-Jimmy-Goh	Tell Jimmy Goh you saw this ad from DurianProperty to get best deal.Ples Contact Jimmy Goh 012-202 9977 for listing (Q 1761) Factory Pandan Indah, Ampang @ Land Area: 6,000 sf @ Built Up: 6,000 sf Near by: - Taman Sri Watan - Taman Dagang Jaya - Taman Industrial Pandan Indah - Ampang New Village - Kampung Baru Ampang - Pandan Cahaya - Pandan Indah - Pandan Mewah - Taman Lembah Maju Amenities: - J…	2021-10-11	Taman Industri Pandan Indah	Ampang Jaya	Durian	Factory	Taman Industri Pandan Indah, Ampang Jaya - Detached Factory For Sale	Vacant	-1	-1	Corner Lot	6000	-1	-1	441.667	-1	-1	https://cdn.durianproperty.com.my/images/classified_ads/299075211628491.jpg
550999	1250	2	Fully Furnished	3	Freehold	2	na	-1	https://www.durianproperty.com.my/classified/3001377/Oasis-2-Residence-Condo-for-sale-by-Wk	Tell Wk you saw this ad from DurianProperty to get best deal.Oasis 2 Condominum =============================== Asking Price : RM550,000 (Nego) =============================== DETAILS ======= *Type: Condominium *3 bedrooms, 2 bathrooms *Freehold *Bulit up: 1250sqft *Balcony with facing pool *Furnished (Kitchen Cabinet, Aircond, Water Heater,Grilll) *2 Covered Carpark FACILITIES ========== *24 Hou…	2021-10-11	Oasis 2 Residence	Kajang	Durian	Condo	Oasis 2 Residence, Kajang - Condo For Sale	na	-1	-1	na	-1	-1	-1	-1	-1	-1	https://cdn.durianproperty.com.my/images/classified_ads/300137711696903.jpg
278000	820	1	Unfurnished	3	Leasehold	1	REN No.: 123456	Even	https://www.durianproperty.com.my/classified/3014489/Indah-Mas-Apartment-Apartment-for-sale-by-Even	Tell Even you saw this ad from DurianProperty to get best deal.Kindly Calling Even Chong 016-3313 521 for viewing, Thanks. (Whatsapp Link here) Area : Taman Ikan Emas (Cheras) Property : Pangsapuri Indah Mas Price : Rm 278,000 *** 3% Downpayment *** *** accept EFP Payment *** *** Cheras Center Point *** - Corner Lot - Non-Bumi Lot - 820 Sqft - 3 bedroom and 1 bathroom - KL view - Extra window and…	2021-10-11	Indah Mas Apartment	Kuala Lumpur	Durian	Apartment	Indah Mas Apartment, Kuala Lumpur - Apartment For Sale	Tenanted	-1	-1	Corner Lot	-1	-1	-1	-1	-1	-1	https://cdn.durianproperty.com.my/images/classified_ads/301448911789146.jpg
458000	1540	2	Unfurnished	3	Freehold	na	na	Kelvin Chop	https://www.durianproperty.com.my/classified/3011646/Taman-Johor-Terrace-House-for-sale-by-Kelvin-Chop	Tell Kelvin Chop you saw this ad from DurianProperty to get best deal.SINGLE STOREY TERRACED HOUSE FOR SALE * Taman Johor * 3 Bedrooms & 2 Bathrooms * Land Area 22 x 70 * Unblock view * Freehold * International Lot * No Co broke For This Unit * Owner listing are welcome. We will help you marketing your property and provide professional advice on current market trend. If you're interested, kindly …	2021-10-11	Taman Johor	Johor Bahru	Durian	Terrace House	Taman Johor, Johor Bahru - Terrace House For Sale	na	-1	-1	End Lot	-1	-1	-1	-1	-1	-1	https://cdn.durianproperty.com.my/images/classified_ads/301164611767956.jpg
460000	2088	3	Fully Furnished	4 + 1	Freehold	2	na	-1	https://www.durianproperty.com.my/classified/3030436/Taman-Scientex-Utama-Terrace-House-for-sale-by-MURVIN-NAIR-VASUDEVAN	Tell MURVIN NAIR VASUDEVAN you saw this ad from DurianProperty to get best deal.jalan Scientex jaya , taman scientex senai 81400 senai Johor -2.5 storey -18x65 -freehold -International lot -intermediate lot -4 bedrooms + 3bathrooms -fully renovated and balcony extended , modern plaster ceiling -kitchen cabinet & wall mounted TV console & auto stainless steel gate let go ... - car porch & balcony …	2021-10-11	Taman Scientex Utama	Senai	Durian	Terrace House	Taman Scientex Utama, Senai - Terrace House For Sale	Owner Occupied	-1	East	Intermediate Lot	1170	-1	-1	393.162	-1	-1	https://cdn.durianproperty.com.my/images/classified_ads/303043611903284.jpeg
370000	1101	2	Partly Furnished	3	Freehold	2	REN No.: 21735	Shafiq Rahman	https://www.durianproperty.com.my/classified/3022490/Pearl-Avenue-Condo-for-sale-by-Shafiq-Rahman	Tell Shafiq Rahman you saw this ad from DurianProperty to get best deal.For Sale: Pearl Avenue Condominium, Sungai Chua, Kajang . DETAILS: + FREEHOLD. + Level 13 + Built-Up Area: 1,101 sq. ft. + 3 Bedrooms & 2 Bathrooms. + Renovated & Furnished with Kitchen Cabinet, Kitchen Hood & Hob, Ceiling Fans & Lightings. + 2 Carparks. . FACILITIES: + 24 Hours Security with Access Cards + Swimming Pool + Gy…	2021-10-11	Pearl Avenue	Kajang	Durian	Condo	Pearl Avenue, Kajang - Condo For Sale	na	-1	-1	na	-1	-1	-1	-1	-1	-1	https://cdn.durianproperty.com.my/images/classified_ads/302249011845838.jpg
665000	2740	5	Partly Furnished	5	Freehold	na	na	Rena Rahman	https://www.durianproperty.com.my/classified/3049393/Rembulan-Semi-D-for-sale-by-Rena-Rahman	Tell Rena Rahman you saw this ad from DurianProperty to get best deal.Double Storey Semi D - Jalan Timur Bandar Enstek Nilai ===================== Asking Price RM775K NEGO Urgent Sale: RM665K (Price Below SPA) ===================== Details: - 5 bedrooms + 1 (Stor), 5 Bathrooms - LA: 3200 / 40 x 80 - BU: 2740 - FREEHOLD - Intermediate - Wet Kitchen - Dry Kitchen - Grill at all doors & windows, Kit…	2021-10-11	Rembulan	Bandar Enstek	Durian	Semi D	Rembulan, Bandar Enstek - Semi D For Sale	Vacant	-1	-1	Intermediate Lot	3200	-1	-1	207.812	-1	-1	https://cdn.durianproperty.com.my/images/classified_ads/304939312032305.jpg
1650000	3242	5	Unfurnished	6	Freehold	na	REN No.: 30501	Ezad Property	https://www.durianproperty.com.my/classified/3034654/Lake-Point-Residences-Terrace-House-for-sale-by-Ezad-Property	Tell Ezad Property you saw this ad from DurianProperty to get best deal.3 Storey Corner Lot Lake Point Residence Cyberjaya For Sale PROPERTY DETAILS: ================= - Freehold - Non Bumi Lot - Built up : 3242 sqft - Land Area : 3434 sqft - 5 +1 Bedrooms - 5 Bathrooms - Balcony/Patio - LARGEST Corner Unit in Lake Point Residence - Excellent view and orientation - Facing South, while the west si…	2021-10-11	Lake Point Residences	Cyberjaya	Durian	Terrace House	Lake Point Residences, Cyberjaya - Terrace House For Sale	na	-1	-1	na	3434	-1	-1	480.489	-1	-1	https://cdn.durianproperty.com.my/images/classified_ads/303465411931169.jpg
250000	500	2	Partly Furnished	2	Freehold	na	na	Sammi Chua	https://www.durianproperty.com.my/classified/3051452/Sepang-Gold-Coast-Condo-for-sale-by-Sammi-Chua	Tell Sammi Chua you saw this ad from DurianProperty to get best deal.Freehold Student Rental Cover Installment New Launching Condo -Best Investment -High Rental -Ready Tenant 1. FREEHOLD 2. NO Downpayment 3. FREE 70% Furnishing 4. FREE LEGAL FEE + MOT worth 5. BELOW market 20-30% Immediately earn RM100k 6. NO need to pay for installment 7. Rental Passive income up to RM3000 8. Dual Key Concept # …	2021-10-11	Sepang Gold Coast	Sepang	Durian	Condo	Sepang Gold Coast, Sepang - Condo For Sale	na	-1	-1	na	-1	-1	-1	-1	-1	-1	https://cdn.durianproperty.com.my/images/classified_ads/305145212047196.jpg
430000	1200	2	Unfurnished	3	Freehold	0	REN No.: 30831	Hanani Nordin	https://www.durianproperty.com.my/classified/3050403/Taman-Sri-Gombak-Terrace-House-for-sale-by-Hanani-Nordin	Tell Hanani Nordin you saw this ad from DurianProperty to get best deal.FOR SALE: END LOT Double Storey Fasa 9, Taman Sri Gombak - Low Booking CONTACT : CIK NANI 0126420242 ASKING PRICE : RM 430,000 . DETAILS: * Freehold * Land Area : 14x55 (770sqft) * Built up : 1350 sqft approx * 3 bedrooms * 2 bathrooms * Facing Mainroad * Renovated . AMENITIES: - Giant Batu Caves - McDonald - KFC - Shell/Petr…	2021-10-11	Taman Sri Gombak	Batu Caves	Durian	Terrace House	Taman Sri Gombak, Batu Caves - Terrace House For Sale	Vacant	-1	-1	End Lot	770	-1	-1	558.442	-1	-1	https://cdn.durianproperty.com.my/images/classified_ads/305040312039715.jpg
530000	1300	3	na	3	na	2	REN No.: 0168262293	Roselyn	https://www.durianproperty.com.my/classified/3028351/Pandan-Indah-Condo-for-sale-by-Roselyn	Tell Roselyn you saw this ad from DurianProperty to get best deal.KLCC view ! hot selling ! Luxury semi -D Low market price !!super Low density !! Contact-Roselyn 0168262293You may view Pandan Indah Profile here.	2021-10-11	Pandan Indah	Kuala Lumpur	Durian	Condo	Pandan Indah, Kuala Lumpur - Condo For Sale	na	-1	-1	na	-1	-1	-1	-1	-1	-1	https://cdn.durianproperty.com.my/images/classified_ads/302835111888298.jpeg
550000	1400	3	na	4	Leasehold	na	REN No.: 40682	Akmal Bin Adam	https://www.durianproperty.com.my/classified/3021169/Taman-Puncak-Jalil-Terrace-House-for-sale-by-AKMAL-BIN-ADAM	Tell AKMAL BIN ADAM you saw this ad from DurianProperty to get best deal.For Sale: Double Storey House Taman Puncak Jalil, Spacious Unit Puncak Jalil Property Details: ============ > 1400 sqft > 4 Bedrooms and 3 Bathrooms > Water Heater > Aircond in master bedroom > Auto gate > 24 hour Security Guard > Wet and Dry Kitchen > All 3 rooms complete bedroom set with wardrobe > Kitchen Cabinet > Dining…	2021-10-11	Taman Puncak Jalil	Seri Kembangan	Durian	Terrace House	Taman Puncak Jalil, Seri Kembangan - Terrace House For Sale	na	-1	-1	na	1400	-1	-1	392.857	-1	-1	https://cdn.durianproperty.com.my/images/classified_ads/302116911835387.jpeg
430000	920	2	Partly Furnished	3	Freehold	1	na	Sia Yiik Luk	https://www.durianproperty.com.my/classified/3050268/Angkasa-Condominiums-Condo-for-sale-by-Sia-Yiik-Luk	Tell Sia Yiik Luk you saw this ad from DurianProperty to get best deal.Angkasa Condominiums, Cheras. >3-bedroom W 2-bathroom >920 sf each unit. >tenanted especially to the UCSI students. >neighbors Giant Hypermarket Taman Connaught & University College International Sedaya. >It enjoys the nearest distance to University College International Sedaya. >Other from UCSI, there are a few school located…	2021-10-11	Angkasa Condominiums	Cheras	Durian	Condo	Angkasa Condominiums, Cheras - Condo For Sale	Tenanted	-1	-1	Intermediate Lot	-1	-1	-1	-1	-1	-1	https://cdn.durianproperty.com.my/images/classified_ads/305026812038619.jpg
1100000	1700	4	Partly Furnished	4	Leasehold	3	REN No.: 20679	Javen Low	https://www.durianproperty.com.my/classified/3027949/TTDI-Ascencia-Condo-for-sale-by-Javen-Low	Tell Javen Low you saw this ad from DurianProperty to get best deal.Urgent SALE PJ Luxury Condo 40% below market price Linked with Shopping Mall Kelana Jaya Petaling Jaya Only 650psf++ 4+1 room 4 bathroom 1700sf Pls call Javen Low for detail & special package now 017-311 2788 Thanks SPC Property Sdn. Bhd (VE(1)1568 )Please see more of my listings at http://javenlow.myagent.my/.You may view TTDI A…	2021-10-11	TTDI Ascencia	TTDI	Durian	Condo	TTDI Ascencia, TTDI - Condo For Sale	Vacant	-1	-1	Corner Lot	-1	-1	-1	-1	-1	-1	https://cdn.durianproperty.com.my/images/classified_ads/302794911885613.jpg
1135800	554	1	Partly Furnished	1	Freehold	1	na	Tiffany Tang	https://www.durianproperty.com.my/classified/3005263/Agile-Embassy-Garden-Serviced-Residence-for-sale-by-Tiffany-Tang	Tell Tiffany Tang you saw this ad from DurianProperty to get best deal.We focus on Luxury Residential in KLCC, Ampang Hilir, Bukit Tunku, Damansara, Bangsar, KL City, PJ and other parts of Klang Valley. Feel free to contact Tiffany @ +6012 224 8866 (WhatsApp) or tiffany@ to find your perfect dream home. Please go to to see more options for high-end real estate listings in K. Lumpur. Agile Embassy…	2021-10-11	Agile Embassy Garden	Ampang Hilir	Durian	Serviced Residence	Agile Embassy Garden, Ampang Hilir - Serviced Residence For Sale	Vacant	-1	-1	Intermediate Lot	-1	-1	-1	-1	-1	-1	https://cdn.durianproperty.com.my/images/classified_ads/300526311723422.jpg
1350000	850	1	Partly Furnished	1 + 1	Leasehold	1	REN No.: REN13071	Derrick Wan	https://www.durianproperty.com.my/classified/3030133/Eaton-Residences-Serviced-Residence-for-sale-by-Derrick-Wan	You may view Eaton Residences Profile here.	2021-10-11	Eaton Residences	Kuala Lumpur	Durian	Serviced Residence	Eaton Residences, Kuala Lumpur - Serviced Residence For Sale	na	-1	-1	na	-1	-1	-1	-1	-1	-1	https://cdn.durianproperty.com.my/images/classified_ads/303013311901788.jpg
600000	2434	3	Partly Furnished	4	Leasehold	na	REN No.: 19369	Liyana Aziz	https://www.durianproperty.com.my/classified/3009397/Bandar-Putera-2-Terrace-House-for-sale-by-Liyana-Aziz	Tell Liyana Aziz you saw this ad from DurianProperty to get best deal.RENOVATED End Lot 2 Storey House Bandar Putera 2 Klang with EXTENDED FRONT & REAR PROPERTY DETAILS : 2 Storey Terrace House End lot Unit L/A 1464sf B/U 2434+- sf 4 Bedrooms, 3 Bathrooms LEASEHOLD NON Bumi Lot Fully renovation with kitchen cabinet, plaster ceiling whole house, tv cabinet 4 solid security door (main door, rear do…	2021-10-11	Bandar Putera 2	Klang	Durian	Terrace House	Bandar Putera 2, Klang - Terrace House For Sale	na	-1	-1	na	1464	-1	-1	409.836	-1	-1	https://cdn.durianproperty.com.my/images/classified_ads/300939711752120.jpg
250000	625	2	Partly Furnished	2	Freehold	1	REN No.: 29088	Mike Hee	https://www.durianproperty.com.my/classified/3039847/Bandar-Baru-Ampang-Condo-for-sale-by-Mike-Hee	Tell Mike Hee you saw this ad from DurianProperty to get best deal.HOT INVEST BESIDE UNIVERSITY @ SEPANG Maximize Your Investment! High Rental, High Return & High Demand! BUY 1 FREE 2 UNIT!!!BUY 1 FREE 2!!! Installment RM1000 Rental RM2000++ Earn Passive Income RM1000++ ------------------------------------------------------------- Mike 016-3793521 Rental Management Service Provided To Help you Re…	2021-10-11	Bandar Baru Ampang	Ampang	Durian	Condo	Bandar Baru Ampang, Ampang - Condo For Sale	Vacant	-1	-1	Intermediate Lot	-1	-1	-1	-1	-1	-1	https://cdn.durianproperty.com.my/images/classified_ads/303984711964655.jpg
300000	654	2	Unfurnished	3	Freehold	1	REN No.: 03289	Andy Lee	https://www.durianproperty.com.my/classified/3018517/Taman-Bukit-Erskine-Condo-for-sale-by-Andy-Lee	Tell Andy Lee you saw this ad from DurianProperty to get best deal.DISCLAIMER: This is a REAL ADVERTISEMENT and you DESERVE THE REAL INFORMATION. I DON'T advertise fake listing / price / fake pictures to solicit client. Thank you. Taman Bukit Erskine @ Tg Tokong - 650 sqft - 3 Bedrooms - 2 Bathrooms - 2 Car Park -1 fridge -1 washing machine - Upgraded unit - Well Maintained Contact: 016-4513-3774…	2021-10-11	Taman Bukit Erskine	Tanjung Tokong	Durian	Condo	Taman Bukit Erskine, Tanjung Tokong - Condo For Sale	Vacant	-1	-1	Intermediate Lot	-1	-1	-1	-1	-1	-1	https://cdn.durianproperty.com.my/images/classified_ads/301851711816270.jpeg
290000	478	1	Partly Furnished	1	Freehold	1	REN No.: 39679	Bakthiar Affendi Omar	https://www.durianproperty.com.my/classified/3035247/Sunsuria-City-SOHO-for-sale-by-Bakthiar-Affendi-Omar	Tell Bakthiar Affendi Omar you saw this ad from DurianProperty to get best deal.#Easy access to KLIA via highways and nearby ERL Bandar Salak Tinggi station #Connected to the main highways to Kuala Lumpur/ Putrajaya/ Petaling Jaya/ Shah Alam/ Nilai/Seremban. #Within KLIA Aeropolis which are currently under rapid development in the vicinity. #Adjacent to Horizon Square business center– So you don\…	2021-10-11	Sunsuria City	Sepang	Durian	SOHO	Sunsuria City, Sepang - SOHO For Sale	na	-1	-1	na	-1	-1	-1	-1	-1	-1	https://cdn.durianproperty.com.my/images/classified_ads/303524711934331.jpg
370000	1176	2	Partly Furnished	3	Freehold	2	na	Nadia Rahim	https://www.durianproperty.com.my/classified/3029630/Kemensah-Villa-Condo-for-sale-by-Nadia-Rahim	Tell Nadia Rahim you saw this ad from DurianProperty to get best deal.Kemensah Villa Condominium Taman Melawati DETAILS: Type: Condominium Freehold Bumi lot Level 2 Low density Condo Build up 1176 sq. ft. Bedrooms: 3 Bathrooms: 2 2 carpark FACILITIES 24 Hours Security Swimming Pool 24hr Coin Operated Laundry Playground Surau and Mini Market NEARBY AMENITIES 5 mins to Melawati Mall 5 mins to Giant…	2021-10-11	Kemensah Villa	Kemensah	Durian	Condo	Kemensah Villa, Kemensah - Condo For Sale	Vacant	-1	-1	Intermediate Lot	-1	-1	-1	-1	-1	-1	https://cdn.durianproperty.com.my/images/classified_ads/302963011897315.jpg
477900	688	1	Unfurnished	1	Freehold	0	na	Nicholes	https://www.durianproperty.com.my/classified/3046799/D-Majestic-Condo-for-sale-by-Nicholes	Tell Nicholes you saw this ad from DurianProperty to get best deal.************************************************************** Bank Lelong D'Majestic Place Service Apartment, Kuala Lumpur ************************************************************** Alamat : 12-13A, D'Majestic Place, No. 376, Jalan Pudu, 55100, Kuala Lumpur, W.P * Lelong price : RM 477,900 Tarikh lelong : 22 September 2021 --…	2021-10-11	D'Majestic	Pudu	Durian	Condo	D'Majestic, Pudu - Condo For Sale	na	-1	-1	Intermediate Lot	-1	-1	-1	-1	-1	-1	https://cdn.durianproperty.com.my/images/classified_ads/304679912014025.jpg
585000	1600	3	Partly Furnished	5	Freehold	na	na	-1	https://www.durianproperty.com.my/classified/3021658/Teluk-Gadong-Terrace-House-for-sale-by-Wan-Li	You may view Teluk Gadong Profile here.	2021-10-11	Teluk Gadong	Klang	Durian	Terrace House	Teluk Gadong, Klang - Terrace House For Sale	Owner Occupied	-1	South-East	Intermediate Lot	-1	-1	-1	-1	-1	-1	-1
450000	1009	2	na	3	Leasehold	na	na	Kahairul Bin Abd Karim Mohamad	https://www.durianproperty.com.my/classified/3007595/Maxim-Citylights-Condo-for-sale-by-kahairul-bin-abd-karim-mohamad	Tell kahairul bin abd karim mohamad you saw this ad from DurianProperty to get best deal.Maxim Citylight Sentul Kuala Lumpur (Facing Swimming Pool) *1009sf *3 bedrooms *2 bathrooms *1 carparks *leasehold - Bumi Lot - Fully Renovated - Blok E Level 17 FACILITIES:- - swimming pool, - wading pool, - gymnasium, - sauna, - multi-purpose hall, - childrens playground, - surau, - covered parking space. -…	2021-10-11	Maxim Citylights	Sentul	Durian	Condo	Maxim Citylights, Sentul - Condo For Sale	na	-1	-1	na	-1	-1	-1	-1	-1	-1	https://cdn.durianproperty.com.my/images/classified_ads/300759511740687.jpg
500000	1535	3	na	4	Freehold	na	REN No.: 42768	Rasinah Mat Rasol	https://www.durianproperty.com.my/classified/3003086/Taman-Pelangi-Semenyih-Terrace-House-for-sale-by-Rasinah-Mat-rasol	Tell Rasinah Mat rasol you saw this ad from DurianProperty to get best deal.Renovated End Lot Double Storey Taman Pelangi, Semenyih Details : ================ - Freehold - Land Area : 20 x 75 - Built up : 1535 - 4 bedrooms and 3 bathrooms Renovations (Cost RM100K) : ================ - Plastered Ceiling - Porch full tiles - Autogate System - Master bedroom & bathroom - Extended Kitchen Area - Kitc…	2021-10-11	Taman Pelangi Semenyih	Semenyih	Durian	Terrace House	Taman Pelangi Semenyih, Semenyih - Terrace House For Sale	na	-1	-1	na	1500	-1	-1	333.333	-1	-1	https://cdn.durianproperty.com.my/images/classified_ads/300308611708294.jpg
495000	2150	3	Partly Furnished	4	Freehold	2	REN No.: 46061	Mazurul	https://www.durianproperty.com.my/classified/3043347/Taman-Pulai-Indah-Terrace-House-for-sale-by-Mazurul	Tell Mazurul you saw this ad from DurianProperty to get best deal.Double Storey House Tmn Pulai Indah, 4 Bedrooms 3 Bathrooms Land size 20x70 Free hold & International lot Unblock View Fully renovated Kemudahan Sekitar : - - Berdekatan dengan masjid. - 3 minit ke Kedai,7e,Surau,Sekolah - 10min ke UTM - 10min ke Jusco Taman Universiti Eazy access : - 5 minit ke Jalan Skudai-Pontian - Kurang 10 min…	2021-10-11	Taman Pulai Indah	Pulai	Durian	Terrace House	Taman Pulai Indah, Pulai - Terrace House For Sale	Vacant	-1	-1	na	1400	-1	-1	353.571	-1	-1	https://cdn.durianproperty.com.my/images/classified_ads/304334711992381.jpeg
250000	770	2	Unfurnished	2	Freehold	na	na	Kelvin Chop	https://www.durianproperty.com.my/classified/3002553/Taman-Johor-Jaya-Terrace-House-for-sale-by-Kelvin-Chop	Tell Kelvin Chop you saw this ad from DurianProperty to get best deal.DOUBLE STOREY TERRACED LOW COST HOUSE FOR SALE * Low Cost House For First Time Buyer Only * Johor Jaya @ Jalan Seroja * 2 Bedrooms & 2 Bathrooms * Freehold * Kitchen Full Extend * No Co broke For This Unit * Owner listing are welcome. We will help you marketing your property and provide professional advice on current market tre…	2021-10-11	Taman Johor Jaya	Johor Bahru	Durian	Terrace House	Taman Johor Jaya, Johor Bahru - Terrace House For Sale	na	-1	-1	Intermediate Lot	-1	-1	-1	-1	-1	-1	https://cdn.durianproperty.com.my/images/classified_ads/300255311704376.jpg
280000	748	2	na	3	Leasehold	1	na	Lucas Teoh	https://www.durianproperty.com.my/classified/3023026/Putra-Suria-Residence-Apartment-for-sale-by-Lucas-Teoh	Tell Lucas Teoh you saw this ad from DurianProperty to get best deal.PUTRA SURIA RESIDENSI FOR SALE -3BEDROOM + 2 BATHROOM -750SF -STRATA TITLE RELEASED -MID FLOOR -WELL KEPT & MOVE IN CONDITION ***FULL LOAN CAN BE APPLY*** FIRST HOME BUYER GET HIGH DISCOUNT ON LEGAL FEES !!! Full Loan OR CashBack CAN BE ARRANGE !!! Full Loan OR CashBack CAN BE ARRANGE !!! Full Loan OR CashBack CAN BE ARRANGE !!!…	2021-10-11	Putra Suria Residence	Bandar Sri Permaisuri	Durian	Apartment	Putra Suria Residence, Bandar Sri Permaisuri - Apartment For Sale	na	-1	-1	na	-1	-1	-1	-1	-1	-1	https://cdn.durianproperty.com.my/images/classified_ads/302302611850024.jpg
580000	1450	3	Partly Furnished	4	Leasehold	2	REN No.: 16276	Tommy Wong	https://www.durianproperty.com.my/classified/3013101/Taman-Sri-Bahagia-Terrace-House-for-sale-by-tommy-wong	Tell tommy wong you saw this ad from DurianProperty to get best deal.Size is 18x70 freehold Extended ground floor and first floor, Auto Gate, 8 Channel CCTV, Renovated- Fully Tiles, Plaster Ceiling, Kitchen Cabinets, Wardrobe 4 Room 3 Bath Currently the house is vacant. Facing North, Its moving condition Gated and Guarded/ Security Fee monthly RM50 only price is 580K negotiable THE ROOF REALTY (E…	2021-10-11	Taman Sri Bahagia	Cheras South	Durian	Terrace House	Taman Sri Bahagia, Cheras South - Terrace House For Sale	Tenanted	-1	-1	Intermediate Lot	1260	-1	-1	460.317	-1	-1	https://cdn.durianproperty.com.my/images/classified_ads/301310111779547.jpg
219000	575	2	Unfurnished	1	Freehold	1	REN No.: PEA1699	Zuraini Bin Zallin	https://www.durianproperty.com.my/classified/3030250/The-Domain-Condo-Duplex-for-sale-by-Zuraini-bin-Zallin	Tell Zuraini bin Zallin you saw this ad from DurianProperty to get best deal.FOR SALE Duplex Studio - Partially Furnished Cyberjaya, Domain 1 Bright and Airy Unit, High Ceiling, Gold and Black Themed Unit. Build-up area: 575 sf Freehold. Non-bumi unit High Floor Duplex Studio (2-floors) consisting of: 1. Upstairs: One Bedroom & One Bathroom (with Water Heater) 2. Downstairs: One Living Room, Furn…	2021-10-11	The Domain	Cyberjaya	Durian	Condo	The Domain, Cyberjaya - Condo Duplex For Sale	Vacant	-1	-1	Intermediate Lot	-1	-1	-1	-1	-1	-1	https://cdn.durianproperty.com.my/images/classified_ads/303025011902368.jpeg
649000	1730	3	Unfurnished	4	Leasehold	2	REN No.: 14973	Kevin Lee	https://www.durianproperty.com.my/classified/2817328/Cybersouth-Terrace-House-for-sale-by-KEVIN-LEE	Tell KEVIN LEE you saw this ad from DurianProperty to get best deal.2 Storey Double Storey Terrace Link House Casawood Cybersouth MCT For Sale *BUMI PRICE* *NON BUMI UNIT AVAILABLE* *20X60 sf* *Mystery Sales Packages:Low Down Payment (Call For Details)* -RM2000 Booking Fee Only -2% Bumi Discount -S&P Legal & LOAN AGREEMENT Legal Fee Absorb by developer -FREE LOAN STAMP DUTY -Corner Lot & Intermed…	2021-10-11	Cybersouth	Dengkil	Durian	Terrace House	Cybersouth, Dengkil - Terrace House For Sale	Vacant	-1	-1	Intermediate Lot	1200	-1	-1	540.833	-1	-1	https://cdn.durianproperty.com.my/images/classified_ads/281732810627603.jpg
270000	600	1	Partly Furnished	2	Leasehold	2	REN No.: 22296	Alvin Lau	https://www.durianproperty.com.my/classified/3002014/Residensi-Ostia-Serviced-Residence-for-sale-by-Alvin-Lau	Tell Alvin Lau you saw this ad from DurianProperty to get best deal.PENGUMUMAN KEPADA PEMBELI RUMAH PERTAMA ATAU INVESTOR DI KAWASAN BANGI SELANGOR KONDOMINIUM BARU DI BANDAR BARU BANGI , SELANGOR HARGA RM270,000 Sahaja GAJI RM2,500 SUDAH LAYAK BELI LOW DENSITY! ✅ 0% Zero Down Payment ✅ 2 Bilik Tidur / 1Bilik Air ✅ 2 Parking Lot Percuma ✅ Harga dari RM270K Sahaja ✅ Komuniti yang menarik untuk inv…	2021-10-11	Residensi Ostia	Bangi	Durian	Serviced Residence	Residensi Ostia, Bangi - Serviced Residence For Sale	Vacant	-1	-1	Intermediate Lot	-1	-1	-1	-1	-1	-1	https://cdn.durianproperty.com.my/images/classified_ads/300201411701264.jpg
245000	2000	na	na	na	Freehold	na	na	Janice Tan	https://www.durianproperty.com.my/classified/3046231/Bukit-Sentosa-Terrace-Factory-for-sale-by-janice-tan	Tell janice tan you saw this ad from DurianProperty to get best deal.Free Hold 1.5 Storey Factory Jalan Jejarum Bukit Sentosa Rawang For Sale Jalan Jejarum, Bukit Sentosa, 48300 Bukit Beruntung, Rawang, Selangor. *****BUKIT SENTOSA / BERUNTUNG / RAWANG SPECIALIST***** Property Details : Storey : 1.5 Storey Size : 25x80 ( Large Space Warehouse ) Tenure : Freehold Nearby Amenities : - Public bank -…	2021-10-11	Bukit Sentosa	Rawang	Durian	Factory	Bukit Sentosa, Rawang - Terrace Factory For Sale	Vacant	-1	-1	na	2000	-1	-1	122.5	-1	-1	https://cdn.durianproperty.com.my/images/classified_ads/304623112010776.jpg
340000	775	2	Partly Furnished	1	Leasehold	1	na	Lucas Teoh	https://www.durianproperty.com.my/classified/3021649/The-Scott-Soho-Condo-for-sale-by-Lucas-Teoh	Tell Lucas Teoh you saw this ad from DurianProperty to get best deal.SCOTT GARDEN SOHO FOR SALE -1BEDROOM + 2 BATHROOM -775SF -DUPLEX -STRATA TITLE RELEASED -MID FLOOR -WELL KEPT & MOVE IN CONDITION ***FULL LOAN CAN BE APPLY*** FIRST HOME BUYER GET HIGH DISCOUNT ON LEGAL FEES !!! Full Loan OR CashBack CAN BE ARRANGE !!! Full Loan OR CashBack CAN BE ARRANGE !!! Full Loan OR CashBack CAN BE ARRANGE…	2021-10-11	The Scott Soho	Old Klang Road	Durian	Condo	The Scott Soho, Old Klang Road - Condo For Sale	na	-1	-1	na	-1	-1	-1	-1	-1	-1	https://cdn.durianproperty.com.my/images/classified_ads/302164911838982.jpg
720000	1600	3	Unfurnished	4	Freehold	na	REN No.: 34953	Za Rull	https://www.durianproperty.com.my/classified/3020617/Hill-Park-Terrace-House-for-sale-by-za-rull	Tell za rull you saw this ad from DurianProperty to get best deal.NEW HOUSE DOUBLE DOUBLE STOREY HOUSE HILLPARK 3 END LOT KAJANG ============================= (ASKING PRICE: RM 735,000 720,000(NEGO) ============================= PROPERTY DETAIL: -Type : Double Storey -Tenure : Freehold, Non Bumi -Lot -Land size : 30x70 (2100sqft) -Rooms: 4 -Baths: 3 -Facing : Other House -Furnished: Basic Unit FA…	2021-10-11	Hill Park	Bandar Teknologi Kajang	Durian	Terrace House	Hill Park, Bandar Teknologi Kajang - Terrace House For Sale	na	-1	-1	na	2100	-1	-1	342.857	-1	-1	https://cdn.durianproperty.com.my/images/classified_ads/302061711831900.jpeg
275000	995	2	na	3	Freehold	na	REN No.: 35542	Npc Hartanah	https://www.durianproperty.com.my/classified/3027113/Jitra-Semi-D-for-sale-by-NPC-Hartanah	Tell NPC Hartanah you saw this ad from DurianProperty to get best deal.Rumah Semi D Taman Jerai Bayu 3 Bedroom 2 Bathroom 995 sqft Bumi lot Freehold Semi D End lot RM275 000 JIKA BERMINAT BOLEH HUBUNGI NOMBOR YANG TERTERA DI BAWAH:Please see more of my listings at http://NPCHartanah.myagent.my/.You may view Jitra Profile here.	2021-10-11	Jitra	Kedah	Durian	Semi D	Jitra, Kedah - Semi D For Sale	na	-1	-1	End Lot	-1	-1	-1	-1	-1	-1	https://cdn.durianproperty.com.my/images/classified_ads/302711311880058.jpeg
2048200	1862	na	Fully Furnished	na	Freehold	na	REN No.: 00358	Desmond Chee	https://www.durianproperty.com.my/classified/2936475/Wisma-UOA-Office-for-sale-by-Desmond-Chee	Tell Desmond Chee you saw this ad from DurianProperty to get best deal.For more viewing or more information please kindly contact Desmond @ 016-2617677. * Whatsapp available. Furnished Office @ Wisma UOA KLCC, KL City Centre, KL City UOA BUSINESS SUITES *OFFICE UNIT FOR SALE* Size: 1862 sft Asking Price: RM1100 per sf 3+1 rooms Well-kept unit Corner with balcony Great city view Furnished with wor…	2021-10-11	Wisma UOA	KLCC	Durian	Office	Wisma UOA, KLCC - Office For Sale	Vacant	-1	-1	na	-1	-1	-1	-1	-1	-1	https://cdn.durianproperty.com.my/images/classified_ads/293647511263335.jpg
120000	650	2	Unfurnished	3	Leasehold	1	na	Cheong	https://www.durianproperty.com.my/classified/3032473/Flat-Puchong-Permai-Apartment-for-sale-by-Cheong	Tell Cheong you saw this ad from DurianProperty to get best deal.Cheong 014-6378388 Cheong 014-6378388 Cheong 014-6378388 >Well kept >Below market price >High rental return >Near amenities area >Easy access *** This property is arguably one of the best in its range a MUST view *** * Good Property for Own Stay / Investment . * easy access near to town . * Photo is just for a DISPLAY to protect own…	2021-10-11	Flat Puchong Permai	Puchong	Durian	Apartment	Flat Puchong Permai, Puchong - Apartment For Sale	Vacant	-1	-1	na	-1	-1	-1	-1	-1	-1	https://cdn.durianproperty.com.my/images/classified_ads/303247311916507.png
350000	758	1	Fully Furnished	2	Freehold	1	REN No.: 25170	Alex Haw	https://www.durianproperty.com.my/classified/3014945/Ketumbar-Hill-Condo-for-sale-by-Alex-Haw	Tell Alex Haw you saw this ad from DurianProperty to get best deal.Ketumbar Hill Condo Cheras_0%D/Payment+100%FULLoan+Fully Furnished Selling Fast : ========= " Ketumbar Hill Condominium " Location : Cheras, Kuala Lumpur * Hurry Up To Call Viewing * ============================== Selling Price : RM350K ( Negotiable ) ( Below Bank Value ) ============================== ♦ Super LOW ~~ Down Payment …	2021-10-11	Ketumbar Hill	Cheras	Durian	Condo	Ketumbar Hill, Cheras - Condo For Sale	na	-1	-1	na	-1	-1	-1	-1	-1	-1	https://cdn.durianproperty.com.my/images/classified_ads/301494511792690.jpg
435000	1450	2	Partly Furnished	3	Freehold	2	REN No.: 46061	Mazurul	https://www.durianproperty.com.my/classified/3043356/Taman-Daya-Terrace-House-for-sale-by-Mazurul	Tell Mazurul you saw this ad from DurianProperty to get best deal.Update again !! Stock For Sale Taman Daya @ Jalan Nibong - Single Storey Terrace House - 22 x 70 - 3 Beds 2 Baths - Kitchen Fully Extend - Freehold - Intermediate Lot - International Lot - Facing East - Renovated (AutoGate , Kitchen tiles wall , Kitchen Top , Car porch tiles , extand loft , Aircon ,Just finished water leak Painting…	2021-10-11	Taman Daya	Johor Bahru	Durian	Terrace House	Taman Daya, Johor Bahru - Terrace House For Sale	Vacant	-1	-1	Intermediate Lot	1540	-1	-1	282.468	-1	-1	https://cdn.durianproperty.com.my/images/classified_ads/304335611992464.jpeg
270000	550	1	Unfurnished	1	Leasehold	1	REN No.: 04271	M. Ilyas	https://www.durianproperty.com.my/classified/3039874/Damansara-Perdana-Condo-for-sale-by-M-ILYAS	Tell M. ILYAS you saw this ad from DurianProperty to get best deal.ANDA juga ingin miliki (Damansara) , ??? !! B !!! Cepat hubungi saya segera ya sebelum semua unit habis terjual !! DAMANSARA Pre Launch NEW Project Price RM270k only !!! Located at PJ Damansara Near IKEA, 1U Nearby MRT station Branded Developer Register your number now!! Get priority to choose your preferred unit on launching day …	2021-10-11	Damansara Perdana	Petaling Jaya	Durian	Condo	Damansara Perdana, Petaling Jaya - Condo For Sale	na	-1	-1	na	-1	-1	-1	-1	-1	-1	https://cdn.durianproperty.com.my/images/classified_ads/303987411964880.jpg
249000	1000	2	Partly Furnished	3	Freehold	2	REN No.: 1110807-K	John	https://www.durianproperty.com.my/classified/3024859/Eko-Cheras-Condo-for-sale-by-John	Tell John you saw this ad from DurianProperty to get best deal.Good Investment Opportunity (0% Payment, High ROI) ##CASH BACK UP TO 80K,100% Loan & 0% DownPayment ## - Freehold & Resindential Title - Big Balcony - 3Rooms & 2Bths - Free 2 Carpark - Dry & Wet Kicthen - 880sqft - 1400sqft - Landed Concept Design - Beside Big University - Fully Gated & Guarded - High Speed Internet Ready - Free 50% F…	2021-10-11	Eko Cheras	Cheras	Durian	Condo	Eko Cheras, Cheras - Condo For Sale	na	-1	-1	na	-1	-1	-1	-1	-1	-1	https://cdn.durianproperty.com.my/images/classified_ads/302485911864203.png
520000	1080	3	Unfurnished	4	Freehold	na	REN No.: 18431	Norlaila Binti Zainol	https://www.durianproperty.com.my/classified/3040791/Bandar-Bukit-Puchong-Terrace-House-for-sale-by-NORLAILA-BINTI-ZAINOL	Tell NORLAILA BINTI ZAINOL you saw this ad from DurianProperty to get best deal.WTS DOUBLE STOREY TERRACE HOUSE END LOT LOCATION BANDAR BUKIT PUCHONG 4 BEDROOMS 3 BATHROOMS 18 X 60 FREEHOLD PRICE BELOW MARKET VALUE RM520K (Nego) RENOVATION : KITCHEN FULLY EXTENDED, BUILD IN WARDROBE, PLASTER CEILING FACILITIES :- SURAU AT TOYIBBAH, MPSJ FOODCOURT, GROCERY SHOP, 7 ELEVEN, 99 SPEEDMART, 24 HRS LAUN…	2021-10-11	Bandar Bukit Puchong	Puchong	Durian	Terrace House	Bandar Bukit Puchong, Puchong - Terrace House For Sale	Owner Occupied	-1	-1	End Lot	1080	-1	-1	481.481	-1	-1	https://cdn.durianproperty.com.my/images/classified_ads/304079111971458.jpg
379000	2155	3	Fully Furnished	4 + 1	Freehold	2	na	Nick Tan	https://www.durianproperty.com.my/classified/3038691/Glomac-Cyberjaya-Superlink-for-sale-by-nick-tan	Tell nick tan you saw this ad from DurianProperty to get best deal."Double Storey Superlink, Semi-D & Bungalow Mix Development BELOW MARKET VALUE PRICE!! ONLY 3xxk up !!! *Freehold *0% Down payment *GATED GUARDED FREE: - Free SNP Legal & Stamp Duty Fees - Free Loan Agreement & Stamp Duty Fees - Free MOT - Free Guard House Fees - Free Club house accessibility including, Swimming Pool, fully equipp…	2021-10-11	Glomac Cyberjaya	Cyberjaya	Durian	Superlink	Glomac Cyberjaya, Cyberjaya - Superlink For Sale	Vacant	-1	-1	Intermediate Lot	1760	-1	-1	215.341	-1	-1	https://cdn.durianproperty.com.my/images/classified_ads/303869111957635.jpg
830000	1700	4	Partly Furnished	5	Leasehold	na	REN No.: 21735	Shafiq Rahman	https://www.durianproperty.com.my/classified/3011272/Bandar-Baru-Bangi-Terrace-House-for-sale-by-Shafiq-Rahman	Tell Shafiq Rahman you saw this ad from DurianProperty to get best deal.RENOVATED DOUBLE STOREY TERRACE HOUSE END LOT HOUSE SEKSYEN 7, BANDAR BARU BANGI . ======================= ASKING PRICE :RM830,000 (Nego) CONTACT: 011 5648 8149 (Shafiq R) ======================= . DETAILS : - Leasehold / Bumi Lot. - Land Area: 35' x 76' (2,660 sq. ft.). - Built-up Area: 1,700 sq. ft. (Approx). - 5 Bedrooms &…	2021-10-11	Bandar Baru Bangi	Bangi	Durian	Terrace House	Bandar Baru Bangi, Bangi - Terrace House For Sale	na	-1	-1	End Lot	2660	-1	-1	312.03	-1	-1	https://cdn.durianproperty.com.my/images/classified_ads/301127211765103.jpg
750000	1000	2	Partly Furnished	2	Leasehold	1	REN No.: 20679	Javen Low	https://www.durianproperty.com.my/classified/3026059/HighPark-Suites-Condo-for-sale-by-Javen-Low	Tell Javen Low you saw this ad from DurianProperty to get best deal.Urgent SALE Below market price luxury condo for sale Only 750 psf!!!! 2room 2 bathroom 1000sf Pls call Javen Low for detail & special package now 017-311 2788 Thanks SPC Property Sdn. Bhd (VE(1)1568 )Please see more of my listings at http://javenlow.myagent.my/.You may view HighPark Suites Profile here.	2021-10-11	HighPark Suites	Kelana Jaya	Durian	Condo	HighPark Suites, Kelana Jaya - Condo For Sale	Vacant	-1	-1	Corner Lot	-1	-1	-1	-1	-1	-1	https://cdn.durianproperty.com.my/images/classified_ads/302605911873255.jpg
4923750	1894	3	Partly Furnished	2	Freehold	2	REN No.: REN13071	Derrick Wan	https://www.durianproperty.com.my/classified/3030188/Le-Nouvel-Condo-Duplex-for-sale-by-Derrick-Wan	You may view Le Nouvel Profile here.	2021-10-11	Le Nouvel	Kuala Lumpur	Durian	Condo	Le Nouvel, Kuala Lumpur - Condo Duplex For Sale	na	-1	-1	na	-1	-1	-1	-1	-1	-1	https://cdn.durianproperty.com.my/images/classified_ads/303018811902233.jpg
530000	1219	3	Unfurnished	3	Leasehold	2	REN No.: 43976	Andy Ng	https://www.durianproperty.com.my/classified/3047258/PV-18-Residence-Condo-for-sale-by-Andy-Ng	Tell Andy Ng you saw this ad from DurianProperty to get best deal.Fire Sales PV18 for Sale Block B Low Floor 3bed,3bath (Dual Key) Leasehold Bare unit Basketball court Barbeque Area Basement car park Drop Off Point Perimeter Fencing Gymnasium room Landscaped Garden Lift lobby Main entrance Multi-purpose hall 24 hours security Surau (Male & Female) Wading pool Continuing its Platinum Lake City, Ku…	2021-10-11	PV 18 Residence	Setapak	Durian	Condo	PV 18 Residence, Setapak - Condo For Sale	Vacant	-1	-1	na	-1	-1	-1	-1	-1	-1	https://cdn.durianproperty.com.my/images/classified_ads/304725812017395.jpeg
1800000	3242	5+	Partly Furnished	4 + 1	Freehold	na	REN No.: 15376	Wan Azemi	https://www.durianproperty.com.my/classified/3000106/Setia-Eco-Park-Semi-D-for-sale-by-Wan-Azemi	Tell Wan Azemi you saw this ad from DurianProperty to get best deal.Semi Detached End Lot for Sale in Setia Duta, Setia Eco Park Shah Alam Freehold Non Bumi End lot with beautiful garden Built up area 3,242 sf Land area 3,498 sf 4+1 Bedrooms, 6 Baths Partially furnished Well kept unit with greenery surrounding Asking Price RM1.8 mil negotiable Directly contact me for viewing appointment Wan +6017…	2021-10-11	Setia Eco Park	Setia Alam	Durian	Semi D	Setia Eco Park, Setia Alam - Semi D For Sale	na	-1	-1	na	3498	-1	-1	514.58	-1	-1	https://cdn.durianproperty.com.my/images/classified_ads/300010611689122.jpg
315000	935	2	Unfurnished	3	Leasehold	1	na	Wayne Lee	https://www.durianproperty.com.my/classified/3041055/Taman-Alam-Damai-Condo-for-sale-by-Wayne-Lee	Tell Wayne Lee you saw this ad from DurianProperty to get best deal.PR1MA Alam Damai HOC Package: Better Offer, Free SPA Fee, Free MOT & Free Stamping Property Details : - 935sf - 3 Bedroom, 2 Bathroom - Nice View - 1 Covered Car Park - Move In Condition - Sale: RM315k ++ - Rental : RM 1,000 ++ Accessibility: - Convenient access to Connaught, Taman Len Sen, Tun Hussien Onn, Balakong, Seri Kembang…	2021-10-11	Taman Alam Damai	Cheras	Durian	Condo	Taman Alam Damai, Cheras - Condo For Sale	na	-1	-1	na	-1	-1	-1	-1	-1	-1	https://cdn.durianproperty.com.my/images/classified_ads/304105511973135.jpg
358800	1500	2	Unfurnished	4 + 1	Freehold	na	na	-1	https://www.durianproperty.com.my/classified/3037160/Taman-Juasseh-Sentosa-Semi-D-for-sale-by-HANIM-SAMSUDIN	Tell HANIM SAMSUDIN you saw this ad from DurianProperty to get best deal.TAMAN JUASSEH SENTOSA FASA 2C --> RUMAH BERKEMBAR 1 TINGKAT ( 40'X80' ) --> HARGA BERMULA RM 358,800 --> 4 BILIK ; 1 STOR & 2 BILIK AIR --> HAKMILIK KEKAL REZAB MELAYU --> PENDAFTARAN DIBUKA SEKARANG --> CONTACT : HANIM 018-224 9199You may view Taman Juasseh Sentosa Profile here.	2021-10-11	Taman Juasseh Sentosa	Juasseh	Durian	Semi D	Taman Juasseh Sentosa, Juasseh - Semi D For Sale	na	-1	-1	na	3200	-1	-1	112.125	-1	-1	https://cdn.durianproperty.com.my/images/classified_ads/303716011946752.jpg
870000	1500	3	Partly Furnished	4	Leasehold	na	REN No.: 38991	Mohd Pisol	https://www.durianproperty.com.my/classified/3000260/Taman-Bukit-Indah-Terrace-House-for-sale-by-mohd-Pisol	Tell mohd Pisol you saw this ad from DurianProperty to get best deal.END LOT 2 Storey Taman Bukit Indah, Ampang Details: Built up: 1,500 sqft Land size: 1,400 sqft Leasehold bumi lot 4 bedroom 3 bathroom Asking price: RM 870,000 SALE TERMS & CONDITIONS 1. Booking 3.18% is required (negotiable). 2. Balance of deposit 6.82% upon signing of SPA INQUIRIES: Kindly contact me using the below listed con…	2021-10-11	Taman Bukit Indah	Ampang	Durian	Terrace House	Taman Bukit Indah, Ampang - Terrace House For Sale	Vacant	-1	-1	End Lot	1400	-1	-1	621.429	-1	-1	https://cdn.durianproperty.com.my/images/classified_ads/300026011690005.jpg
3800000	9450	na	Unfurnished	na	Freehold	na	REN No.: 00012	Eric Liew	https://www.durianproperty.com.my/classified/3024013/Galleri-Klang-Sentral-Shop-for-sale-by-Eric-Liew	Tell Eric Liew you saw this ad from DurianProperty to get best deal.A new 3 storey corner Shop located at Galeri Klang Sentral just opposite Klang Sentral Bus Terminal with space area of 45 ft x 70 ft x 3 available for sale @ RM3.8 million . Please contact Eric LIew 016-2036278 (REN00012)for more information or viewing arrangement.Please see more of my listings at http://metroworldpj.myagent.my/.…	2021-10-11	Galleri Klang Sentral	Klang	Durian	Shop	Galleri Klang Sentral, Klang - Shop For Sale	Vacant	-1	-1	Corner Lot	3150	-1	-1	1206.35	-1	-1	https://cdn.durianproperty.com.my/images/classified_ads/302401311857895.jpg
900000	392040	na	na	na	Freehold	na	REN No.: 07167	Jc Chin	https://www.durianproperty.com.my/classified/2570641/Linggi-Agriculture-Land-for-sale-by-Jc-Chin	Tell Jc Chin you saw this ad from DurianProperty to get best deal.2.8km from Linggi rantau main road Electricity and water can be connected. All neighboring land is occupied. Selling at 100k per acre. Slight nego only. Thank you No SMS pls. Only serious buyer will be entertained. PROPERTY DETAIL Property : Agriculture Land Daerah: Port Dickson Mukim: Linggi Land Area : (3.6 Hectare) 9 acre +- Lan…	2021-10-11	Linggi	Negeri Sembilan	Durian	Agriculture Land	Linggi, Negeri Sembilan - Agriculture Land For Sale	Vacant	-1	-1	Intermediate Lot	-1	-1	-1	-1	-1	-1	https://cdn.durianproperty.com.my/images/classified_ads/25706419488787.jpg
340000	700	2	Partly Furnished	3	Freehold	2	na	Marina	https://www.durianproperty.com.my/classified/3043403/Suria-Ixora-Apartment-for-sale-by-MARINA	Tell MARINA you saw this ad from DurianProperty to get best deal.FOR SALE!!! SURIA IXORA APARTMENT, SETIA ALAM, PARTLY FURNISH ========================= Asking Price : RM340K (Nego) ========================= . PROPERTY DETAILS : - Partially furnished - Freehold - Bumi Lot - 3 Bedrooms, 2 Bathrooms - 700 sqft - Middle Floor - 2 Parking Nearby Lobby . RENOVATION & UPGRADES : =======================…	2021-10-11	Suria Ixora	Setia Alam	Durian	Apartment	Suria Ixora, Setia Alam - Apartment For Sale	Owner Occupied	-1	-1	Intermediate Lot	-1	-1	-1	-1	-1	-1	https://cdn.durianproperty.com.my/images/classified_ads/304340311992830.jpg
270000	254	na	na	na	Freehold	na	REN No.: 35542	Npc Hartanah	https://www.durianproperty.com.my/classified/3026436/Taman-Damar-Semi-D-Warehouse-for-sale-by-NPC-Hartanah	Tell NPC Hartanah you saw this ad from DurianProperty to get best deal.Single storey semi-detached house at Taman damar, Changloon • Property Type: Semi detached • Title type: Freehold • Bedrooms: 3 • Bathroom: 2 • Size: 254 . • Non Bumi Lot • Facilities: Car Park/Garage The house equipped with an air-Cond, 2 ceiling fans, sofa, washing machine, water heater at bathroom & mini playground. Minor r…	2021-10-11	Taman Damar	Changlun	Durian	Warehouse	Taman Damar, Changlun - Semi-D Warehouse For Sale	na	-1	-1	na	254	-1	-1	1062.99	-1	-1	https://cdn.durianproperty.com.my/images/classified_ads/302643611875590.png
420000	2400	3	Unfurnished	4	Leasehold	na	na	Marina	https://www.durianproperty.com.my/classified/3029897/Alam-Perdana-Terrace-House-for-sale-by-MARINA	Tell MARINA you saw this ad from DurianProperty to get best deal.FOR SALE!!! Rumah Baru siap!! DOUBLE STOREY LBS ALAM PERDANA, PUNCAK ALAM ====================== ASKING PRICE : RM420, 000 nego ====================== Property Details : - Type irama perdana - Phase 2a - Dah siap sepenuhnya - Land Area : 20x60 - Built Up : 2400sqft - Leasehold | Bumi lot - 4 Bedrooms | 3 Bathrooms - Strata title - M…	2021-10-11	Alam Perdana	Bandar Puncak Alam	Durian	Terrace House	Alam Perdana, Bandar Puncak Alam - Terrace House For Sale	Vacant	-1	-1	Intermediate Lot	1200	-1	-1	350	-1	-1	https://cdn.durianproperty.com.my/images/classified_ads/302989711899278.jpeg
545000	1260	2	Partly Furnished	3	Leasehold	1	na	Ween Hassan	https://www.durianproperty.com.my/classified/3049290/Kelana-Mahkota-Condo-for-sale-by-Ween-Hassan	Tell Ween Hassan you saw this ad from DurianProperty to get best deal.LOWER GROUND KELANA MAHKOTA CONDO PROPERTY DETAILS - 1260sqft - 2+1 rooms 2 baths - 1 car park - Open BUMI LOT - Partially furnished Loan and Legal provided. Selling offer : RM545K Nego. For more details: Ween Hassan Weise International Property WA 0197567407 WEISE INTERNATIONAL PROPERTY CONSULTANTS SDN. BHD. (VE(1)0241)You may…	2021-10-11	Kelana Mahkota	Kelana Jaya	Durian	Condo	Kelana Mahkota, Kelana Jaya - Condo For Sale	Tenanted	-1	-1	Corner Lot	-1	-1	-1	-1	-1	-1	https://cdn.durianproperty.com.my/images/classified_ads/304929012031592.jpg
270000	1236	2	Unfurnished	3	Freehold	na	na	David Tan	https://www.durianproperty.com.my/classified/3006248/Residensi-Seremban-Sentral-PRIMA-Condo-for-sale-by-David-Tan	You may view Residensi Seremban Sentral PRIMA Profile here.	2021-10-11	Residensi Seremban Sentral PRIMA	Seremban	Durian	Condo	Residensi Seremban Sentral PRIMA, Seremban - Condo For Sale	Vacant	-1	-1	Corner Lot	-1	-1	-1	-1	-1	-1	https://cdn.durianproperty.com.my/images/classified_ads/300624811730960.JPG
938000	3200	5	na	6	Freehold	na	na	-1	https://www.durianproperty.com.my/classified/2998164/Mont-Callista-Semi-D-for-sale-by-Wind-Too	S-EH0012 For Sale Type-Tulipa @Taman Pulai Bayu(Mont Calista) Property Type: 3 Storey Semi D Renovation: yes Furnishing: Tbc G&G: yes Car park: yes Maintenance fee: no Remarks: can full loan For more information please contact me Wind Too. Phone: 018-7618250 Email: waikit18@ Full Homes Realty (JB) (E(1)1501/5)You may view Mont Callista Profile here.	2021-10-11	Mont Callista	Pulai	Durian	Semi D	Mont Callista, Pulai - Semi D For Sale	na	-1	-1	na	3200	-1	-1	293.125	-1	-1	https://cdn.durianproperty.com.my/images/classified_ads/299816411677979.jpg
1900000	3855	na	Unfurnished	na	Freehold	na	REN No.: 43976	Andy Ng	https://www.durianproperty.com.my/classified/3046729/Savanna-Executive-Suite-Shop-Office-for-sale-by-Andy-Ng	Tell Andy Ng you saw this ad from DurianProperty to get best deal.~2 Sty Savanna Lifestyle Shop-Office @ Southville City FOR SALE~ ******BELOW MARKET PRICE***** -2 Storey Shop-Office -Ground & 1st Floor -Intermediated -Brand new lifestyle Shoplot -Included 5 Carparks -428-acre township -8 Tower Residential (3xxx units) -Ready catchment 15,800 residential -Infront 196 units Avens 2.5/3 Sty link ho…	2021-10-11	Savanna Executive Suite	Dengkil	Durian	Shop Office	Savanna Executive Suite, Dengkil - Shop Office For Sale	na	-1	-1	na	3855	-1	-1	492.866	-1	-1	https://cdn.durianproperty.com.my/images/classified_ads/304672912013455.jpeg
1580000	3670	5	Partly Furnished	5	Leasehold	na	REN No.: 47162	Zarifi Bin Mohd Ederis	https://www.durianproperty.com.my/classified/3021899/Tropicana-Aman-Terrace-House-for-sale-by-Zarifi-Bin-Mohd-Ederis	Tell Zarifi Bin Mohd Ederis you saw this ad from DurianProperty to get best deal.FOR SALE!! Double Storey Semi-D : Cheria Residences BIG UNIT, Below market value & nicely renovated house Located at Tropicana Aman, Kota Kemuning ASKING PRICE : RM 1.58M DETAILS : - Land area : 40’ X 85’ - Built up : 3,670 sq ft - 4 + 1 Bedrooms - 5 Bathrooms - 1 Powder room - Fully aircond : living hall & all bedro…	2021-10-11	Tropicana Aman	Kota Kemuning	Durian	Terrace House	Tropicana Aman, Kota Kemuning - Terrace House For Sale	Vacant	-1	-1	Intermediate Lot	3400	-1	-1	464.706	-1	-1	https://cdn.durianproperty.com.my/images/classified_ads/302189911840856.JPG
1400000	1500	3	Fully Furnished	4	Freehold	2	REN No.: 20679	Javen Low	https://www.durianproperty.com.my/classified/3018554/Pavilion-Hilltop-Condo-for-sale-by-Javen-Low	Tell Javen Low you saw this ad from DurianProperty to get best deal.Pavilion Hilltop, Mont Kiara for SALE 1500sf 3+1 room 3 bathroom 2 parking Level 17 Fully Furnished : -TV -sofa -fridge -washing machine -all room with air-con -all room wardrobe -lights -grill -built in kitchen cabinet -built in gas hob & range hoob -curtain -etc Pls call Javen Low for detail & viewing at 017-311 2788 Thanks SPC…	2021-10-11	Pavilion Hilltop	Mont Kiara	Durian	Condo	Pavilion Hilltop, Mont Kiara - Condo For Sale	Vacant	-1	-1	Intermediate Lot	-1	-1	-1	-1	-1	-1	https://cdn.durianproperty.com.my/images/classified_ads/301855411816544.jpg
1388000	1180	2	Partly Furnished	1 + 1	Freehold	1	na	-1	https://www.durianproperty.com.my/classified/2997004/The-Sentral-Residences-Serviced-Residence-for-sale-by-Zilla-Ahmad	Partly-Furnished with Interior Design Homes: - Quality Sofa set & Dining table set - 1 Bedroom sets - Quality Sofa set & Dining table set - Kitchen Cabinet - Washer Machine - Higher Level Pls contact ZILLA AHMAD @ 012-7901887 for viewing & more details. Property Name : The Sentral Residences Property Type: Serviced Apt Tenure: Freehold No. of Storey : 56-storey Total No. of Units : 752units Low Z…	2021-10-11	The Sentral Residences	KL Sentral	Durian	Serviced Residence	The Sentral Residences, KL Sentral - Serviced Residence For Sale	na	-1	-1	na	-1	-1	-1	-1	-1	-1	https://cdn.durianproperty.com.my/images/classified_ads/299700411671081.jpg
699000	987	na	Fully Furnished	na	Freehold	na	REN No.: 10351	Benny Chew	https://www.durianproperty.com.my/classified/2983068/Oasis-Square-Office-for-sale-by-Benny-Chew	Tell Benny Chew you saw this ad from DurianProperty to get best deal.Oasis Square MSC status Office for sale, Ara Damansara, Petaling Jaya, Selangor Owner Unit ready for RENT and SELL Oasis Square Office @ Ara Damansara Block B Low Floor Size: 987sf Condition: very good fully furnish 2 personal room/ staff work desk/air-con/lighting/full carpet Rental: RM2100 Selling Price: RM699K I have few othe…	2021-10-11	Oasis Square	Ara Damansara	Durian	Office	Oasis Square, Ara Damansara - Office For Sale	Vacant	-1	-1	Corner Lot	-1	-1	-1	-1	-1	-1	https://cdn.durianproperty.com.my/images/classified_ads/298306811575524.jpg
380000	956	2	Fully Furnished	3	Freehold	2	REN No.: 39397	Mohd Arif B Che Soh	https://www.durianproperty.com.my/classified/3011200/Villa-Park-Condo-for-sale-by-Mohd-Arif-B-Che-Soh	Tell Mohd Arif B Che Soh you saw this ad from DurianProperty to get best deal.Villa Park Condo @ Taman Bukit Serdang ====================================== Asking Price RM380,000 Details : ====== - Condominium - Block B Level 2 - Freehold - 3 Bedrooms 2 Bathroom - Size 956 . - Non Bumi Lot - Fully Furnished - 2 Parking Lot - 1 units aircond - 1 lighting fan - 1 units water heater - kitchen cabine…	2021-10-11	Villa Park	Seri Kembangan	Durian	Condo	Villa Park, Seri Kembangan - Condo For Sale	Owner Occupied	-1	-1	na	-1	-1	-1	-1	-1	-1	https://cdn.durianproperty.com.my/images/classified_ads/301120011764483.jpg
750000	1391	2	Partly Furnished	3	Freehold	na	REN No.: 33804	Zurin Zakuan	https://www.durianproperty.com.my/classified/3006614/Taman-Dahlia-Semi-D-for-sale-by-Zurin-Zakuan	Tell Zurin Zakuan you saw this ad from DurianProperty to get best deal.FOR SALE : Single Storey Semi D corner lot Taman Dahlia Bandar Baru Salak Tinggi Selangor DETAILS: Freehold Size: 6781 sqft (Land Size) Build up: 1391 sqft 3 bedrooms, 2 bathrooms Huge Land Area Aircond NEARBY AMENITIES: (Supermarkets & Restaurant nearby) - SMK Bandar Baru Salak Tinggi (400m) - SK Taman Seroja (1km) - SK KLIA …	2021-10-11	Taman Dahlia	Sepang	Durian	Semi D	Taman Dahlia, Sepang - Semi D For Sale	Owner Occupied	-1	-1	na	6781	-1	-1	110.603	-1	-1	https://cdn.durianproperty.com.my/images/classified_ads/300661411733690.jpg
255000	962	2	Unfurnished	3	Leasehold	1	REN No.: 42200	Olin Safura	https://www.durianproperty.com.my/classified/3012375/Kepong-Central-Condominium-Condo-for-sale-by-Olin-Safura	Tell Olin Safura you saw this ad from DurianProperty to get best deal.[BELOW MV!!!] LEVEL 7 KEPONG SENTRAL CONDOMINIUM Taman Puncak Desa 52100 Kepong ==================== ASKING PRICE: RM260,000 nego! ==================== DETAILS : - leasehold strata title ready - lights &ceiling fans, covered balcony, grilled - Bedroom 3 - Bathroom 2 - Built up area 962 sqft - Newly painted - Full tiles - Level …	2021-10-11	Kepong Central Condominium	Kepong	Durian	Condo	Kepong Central Condominium, Kepong - Condo For Sale	na	-1	-1	na	-1	-1	-1	-1	-1	-1	https://cdn.durianproperty.com.my/images/classified_ads/301237511773285.jpg
355000	1120	3	Partly Furnished	4	Leasehold	1	REN No.: 26532	Rizar Arbain	https://www.durianproperty.com.my/classified/3034194/Bandar-Tasik-Puteri-Cluster-for-sale-by-Rizar-Arbain	Tell Rizar Arbain you saw this ad from DurianProperty to get best deal.Asking Price: 355,000.00 A double storey semi detached cluster house for Sale within Bandar Tasik Puteri, Rawang, Selangor Darul Ehsan. It is approximately 16 kilometres south-west of Rawang town whilst the Kuala Lumpur City Centre is situated about 40 kilometres due south-east. Bandar Tasik Puteri has road networks with acces…	2021-10-11	Bandar Tasik Puteri	Rawang	Durian	Cluster	Bandar Tasik Puteri, Rawang - Cluster For Sale	Tenanted	-1	-1	Intermediate Lot	1500	-1	-1	236.667	-1	-1	https://cdn.durianproperty.com.my/images/classified_ads/303419411927421.jpg
490000	1100	2	Partly Furnished	3	Freehold	1	na	Mohd Fauzi Mohamed	https://www.durianproperty.com.my/classified/3006955/Pertiwi-Indah-Condo-for-sale-by-MOHD-FAUZI-MOHAMED	Tell MOHD FAUZI MOHAMED you saw this ad from DurianProperty to get best deal.PERTIWI INDAH CONDOMINIUM Taman Maluri FOR SALE UNIT & DEVELOPMENT CHARACTERISTICS Type: Condominium Tenure: Leasehold / Non Bumi Lot Built up : 1100sf Room : 3 Bath : 2 Position : End Lot Furnishing : Partially Furnished Level : Middle View : Parking Car Parking : 1 Maintenance Fee : RM250 ADDITIONAL FEATURES Strata Rea…	2021-10-11	Pertiwi Indah	Cheras	Durian	Condo	Pertiwi Indah, Cheras - Condo For Sale	na	-1	-1	End Lot	-1	-1	-1	-1	-1	-1	https://cdn.durianproperty.com.my/images/classified_ads/300695511736073.jpg
298880	1125	2	Unfurnished	4	Leasehold	2	na	Kamarul	https://www.durianproperty.com.my/classified/3047143/Bidor-Damansara-Bungalow-House-for-sale-by-Kamarul	Tell Kamarul you saw this ad from DurianProperty to get best deal.Lokasi strategi di dalam pekan Bidor. Berdekatan dengan semua kemudahan. Bidor dikenali sebagai Glove City dimana kilang buat glove akan dibuka di Bidor yg mana akan menyediakan peluang pekerjaan seramai 6000 tenaga. Projek ini sesuai untuk kediaman sendiri maupun untuk tujuan pelaburan.You may view Bidor Damansara Profile here.	2021-10-11	Bidor Damansara	Bidor	Durian	Bungalow House	Bidor Damansara, Bidor - Bungalow House For Sale	Vacant	-1	-1	na	3600	-1	-1	83.0222	-1	-1	https://cdn.durianproperty.com.my/images/classified_ads/304714312016350.jpg
565250	1510	2	na	4	Freehold	na	na	-1	https://www.durianproperty.com.my/classified/3038320/Cinta-Sayang-Resort-Villas-Semi-D-for-sale-by-hafeezatul	You may view Cinta Sayang Resort Villas Profile here.	2021-10-11	Cinta Sayang Resort Villas	Sungai Petani	Durian	Semi D	Cinta Sayang Resort Villas, Sungai Petani - Semi D For Sale	Vacant	-1	-1	na	3835	-1	-1	147.392	-1	-1	https://cdn.durianproperty.com.my/images/classified_ads/303832011954657.jpeg
727800	1100	2	Partly Furnished	3	Freehold	2	REN No.: 27392	Janice Loo	https://www.durianproperty.com.my/classified/3047896/Taman-Sri-Segambut-Condo-for-sale-by-Janice-Loo	Tell Janice Loo you saw this ad from DurianProperty to get best deal.Feel Free To Call In or Pm In For Limited Unit & Package : Janice Loo - 014-9516968 6 Star Grade Built Up With Full KLCC View, Low Density & Installment Sky SEMI-D Santorini LUXURY RESORT Condo [Super Low Density] Extraordinary KLCC SKYLINE VIEW ------------------------------------------------------ # 0% Downpayment # Low Instal…	2021-10-11	Taman Sri Segambut	Kuala Lumpur	Durian	Condo	Taman Sri Segambut, Kuala Lumpur - Condo For Sale	na	-1	-1	na	-1	-1	-1	-1	-1	-1	https://cdn.durianproperty.com.my/images/classified_ads/304789612021305.jpg
300000	1000	2	Fully Furnished	3	Freehold	na	na	Elijahani	https://www.durianproperty.com.my/classified/3006860/Taman-Permai-3-Terrace-House-for-sale-by-Elijahani	Tell Elijahani you saw this ad from DurianProperty to get best deal.For more info, contact Eli at 011 27453329 ================= Asking price: RM300,000 (Negotiable) ================= Details: -3 bedrooms & 2 bathrooms - 1000sqft -Freehold/non bumi -Tenanted - Fully Furnished Nearby Amenities: -Palm Mall -KPJ Hospital -Seremban Town - Restaurant - Petrol Station -99 Speedmart - Seremban 2 -KLIA A…	2021-10-11	Taman Permai 3	Seremban	Durian	Terrace House	Taman Permai 3, Seremban - Terrace House For Sale	Tenanted	-1	-1	Intermediate Lot	1000	-1	-1	300	-1	-1	https://cdn.durianproperty.com.my/images/classified_ads/300686011735338.jpeg
430000	1000	2	Unfurnished	3	Freehold	1	REN No.: e2532	Rosniza Mohamed	https://www.durianproperty.com.my/classified/3042497/BK1-Terrace-House-for-sale-by-ROSNIZA-MOHAMED	Tell ROSNIZA MOHAMED you saw this ad from DurianProperty to get best deal.located with the great location at BK1. 2 minutes only drive to Giant Kinrara. Fully renovated unit- come and see the unit first. if you are interested to view the property, please do not hesitate to call me For more information please contact me rosniza mohamed. Phone: 019-2890218 Email: rosniza@ IM Global Property Consult…	2021-10-11	BK1	Bandar Kinrara	Durian	Terrace House	BK1, Bandar Kinrara - Terrace House For Sale	Vacant	-1	-1	Intermediate Lot	1100	-1	-1	390.909	-1	-1	https://cdn.durianproperty.com.my/images/classified_ads/304249711985439.jpg
156816000	52272	na	na	na	Freehold	na	REN No.: REN 42655	Mike Yuen	https://www.durianproperty.com.my/classified/3048473/Jalan-Sultan-Ismail-Commercial-Land-for-sale-by-mike-yuen	Tell mike yuen you saw this ad from DurianProperty to get best deal.Mike 011-19131319 Mike 011-19131319 Mike 011-19131319 whatapps >Well kept >Below market price >High rental return >Near amenities area >Easy access *** This property is arguably one of the best in its range a MUST view *** * Good Property for Own Stay / Investment . * easy access near to town . * Photo is just for a DISPLAY to pr…	2021-10-11	Jalan Sultan Ismail	KL City Centre	Durian	Commercial Land	Jalan Sultan Ismail, KL City Centre - Commercial Land For Sale	na	-1	-1	na	-1	-1	-1	-1	-1	-1	https://cdn.durianproperty.com.my/images/classified_ads/304847312025975.jpeg
2400000	3790	5+	Unfurnished	6	Freehold	na	na	Zmriena	https://www.durianproperty.com.my/classified/3035471/Casa-Sutra-Bungalow-House-for-sale-by-zmriena	Tell zmriena you saw this ad from DurianProperty to get best deal.PROPERTY DETAIL. ; - Freehold/Non bumi - Land size 60 x 80 - Built up 3790sqft - 5+1 bedroom, 6 baths - Guarded and gated - Facing playground, open space - Orientation: facing north east - Basic unit Amenities: - 6min to Idrissi International School - 5min to Setia City Convention Centre, Setia City Mall - 8min to Tesco Setia Alam …	2021-10-11	Casa Sutra	Setia Alam	Durian	Bungalow House	Casa Sutra, Setia Alam - Bungalow House For Sale	na	-1	-1	na	4800	-1	-1	500	-1	-1	https://cdn.durianproperty.com.my/images/classified_ads/303547111935733.jpg
500000	2200	3	Partly Furnished	4	Leasehold	3	REN No.: 09231	Lai Yat Foo	https://www.durianproperty.com.my/classified/2998692/Taman-Len-Sen-Terrace-House-for-sale-by-Lai-Yat-Foo	Tell Lai Yat Foo you saw this ad from DurianProperty to get best deal.2 Sty House For Sale In Taman Len Seng, Cheras * Kitchen Fully Extend * One Of The Best Location In Cheras * Last Transaction In This Location RM 625k * Below Market Price RM100K & ABOVE * 4R3B Please call Lai at 012-6382316 for viewing apointmentPlease see more of my listings at http://YFLAI.myagent.my/.You may view Taman Len …	2021-10-11	Taman Len Sen	Cheras	Durian	Terrace House	Taman Len Sen, Cheras - Terrace House For Sale	Owner Occupied	-1	-1	Intermediate Lot	1430	-1	-1	349.65	-1	-1	https://cdn.durianproperty.com.my/images/classified_ads/299869211681618.jpg
480000	1267	2	Unfurnished	3	Freehold	2	na	Rachael Mooi	https://www.durianproperty.com.my/classified/3033615/SK-One-Residence-Condo-for-sale-by-Rachael-Mooi	Tell Rachael Mooi you saw this ad from DurianProperty to get best deal.SK One residence @ Bukit Serdang Seri Kembangan ~~~~~~~~~~~~~~~~~~ Agent : Steve 012-506 8169 ~~~~~~~~~~~~~~~~~~ 1267sf 3 rooms 2 baths high floor freehold newly paint kitchen cabinet 2 carparks View to appreciate can arrange 100% Full loan Asking price RM480k Pls call Steve 012-506 8169 Pls call Steve 012-506 8169 Pls call St…	2021-10-11	SK One Residence	Seri Kembangan	Durian	Condo	SK One Residence, Seri Kembangan - Condo For Sale	Vacant	-1	-1	Corner Lot	-1	-1	-1	-1	-1	-1	https://cdn.durianproperty.com.my/images/classified_ads/303361511923833.jpg
500000	688	2	Partly Furnished	3	Freehold	1	na	Azie Amylia	https://www.durianproperty.com.my/classified/3027332/Fera-Residence-The-Quartz-Condo-for-sale-by-Azie-Amylia	Tell Azie Amylia you saw this ad from DurianProperty to get best deal.Negotiable!! RM 500,000 For further details and viewing, contact: Azie Amylia: 0133664211 REN39214 688 sq ft 3 bedrooms 2 bathrooms Freehold Non bumi lot [ FACILITIES & FEATURES ] 1. 50m Infinity Lap Pool 2. Kids Pool 3. Lazy Jacuzzi 4. Reading Room 5. Yoga in a Woodland 6. Forest Walk Garden 7. Quartz Crystal Garden 8. BBQ Pit…	2021-10-11	Fera Residence @ The Quartz	Wangsa Maju	Durian	Condo	Fera Residence @ The Quartz, Wangsa Maju - Condo For Sale	na	-1	-1	na	-1	-1	-1	-1	-1	-1	https://cdn.durianproperty.com.my/images/classified_ads/302733211881544.jpg
1250000	10000	na	na	na	Leasehold	na	REN No.: 00426	Vivian Ong	https://www.durianproperty.com.my/classified/3050368/Taman-Cheras-Jaya-Bungalow-Land-for-sale-by-Vivian-Ong	Tell Vivian Ong you saw this ad from DurianProperty to get best deal. GOOD FENG SHUI Bungalow Land for sale !! Limited Lot Property: Bungalow Land Location: Taman Cheras Jaya, Balakong Land Size:10k sf Tenure:Leasehold Status : Vacant Asking Per sqft: RM125psf nego Drop me a call if you like to view Link for more properties :- Don’t Worry , I Am Registered Under The Board Of Valuers Appraiser And…	2021-10-11	Taman Cheras Jaya	Balakong	Durian	Bungalow Land	Taman Cheras Jaya, Balakong - Bungalow Land For Sale	Vacant	-1	-1	Intermediate Lot	-1	-1	-1	-1	-1	-1	https://cdn.durianproperty.com.my/images/classified_ads/305036812039401.jpg
405000	926	2	Partly Furnished	3	Freehold	na	REN No.: PEA 2479	Cherie Chong	https://www.durianproperty.com.my/classified/3002954/The-Majestic-Condo-for-sale-by-Cherie-Chong	Tell Cherie Chong you saw this ad from DurianProperty to get best deal.The Majestic Condo for sale @ RM405k (Located at Ipoh Town Centre) * Selling Below Market Value ( Bank Value at Rm450k) * 926 sqft * 3 bedrooms 2 bathrooms * Freehold * Partly Furnished with 2 Aircond, Built in Kitchen Cabinet, lights and fans, water heater * 1 car park * Suitable for investment purpose Facilities: *5 Lifts wi…	2021-10-11	The Majestic	Ipoh	Durian	Condo	The Majestic, Ipoh - Condo For Sale	na	-1	-1	na	-1	-1	-1	-1	-1	-1	https://cdn.durianproperty.com.my/images/classified_ads/300295411707287.jpg
525000	1844	4	Unfurnished	4	Freehold	1	na	Hafiz Bin Tajri	https://www.durianproperty.com.my/classified/3044710/D-Mayang-Sari-Terrace-House-for-sale-by-Hafiz-bin-Tajri	Tell Hafiz bin Tajri you saw this ad from DurianProperty to get best deal.RM199 JE DAH BOLEH DAPAT RUMAH* ======================== Double Storey House Freehold Individual Title ======================== Property Details: ================== * Double Storey * FREEHOLD BUMI * Build up Size : 1844 sqft (20'x60') * 4 Bedrooms * 4 Bathrooms * Parking Lot * Spacious unit - each rooms can fit queen size b…	2021-10-11	D'Mayang Sari	Nilai	Durian	Terrace House	D'Mayang Sari, Nilai - Terrace House For Sale	Vacant	-1	-1	na	1400	-1	-1	375	-1	-1	https://cdn.durianproperty.com.my/images/classified_ads/304471012001599.jpg
390000	1080	2	Partly Furnished	3	Leasehold	2	REN No.: 13031	Mahadhir	https://www.durianproperty.com.my/classified/3025731/One-Damansara-Apartment-for-sale-by-Mahadhir	Tell Mahadhir you saw this ad from DurianProperty to get best deal.One Damansara Condo, Damansara Damai, Petaling Jaya, Selangor "BEST DEAL FOR INVESTMENT AND OWN STAY" Property Details : - 3 Bedrooms - 2 Bathrooms - Size 1080 Sqft - Balcony Pool View - Renovation fully furnished - Wet and dry kitchen - 2 Covered Car Parking - Covered Motor Bike Parking - Low Density - Very Nice Conditions - High…	2021-10-11	One Damansara	Damansara Damai	Durian	Apartment	One Damansara, Damansara Damai - Apartment For Sale	na	-1	-1	na	-1	-1	-1	-1	-1	-1	https://cdn.durianproperty.com.my/images/classified_ads/302573111870831.jpeg
459000	1272	2	na	4	Freehold	1	REN No.: 02035	Oscar Tan	https://www.durianproperty.com.my/classified/3014673/Rivercity-Condo-for-sale-by-Oscar-Tan	Tell Oscar Tan you saw this ad from DurianProperty to get best deal.BELOW MARKET PRICE FROM RM 500K (Few Unit For Choose ) @ Rivercity Condo Jalan Ipoh + FREEHOLD + STRATA TITLE + Neal too MRL Jalan Ipoh + Cash Back Scheme Available To Apply ***RIVERCITY AGENT SPECIALIS*** Basic or Renovated =============== 1- Plaster Ceiling 2- Down Lightings 3- Modern Kitchen Cabinet 4- Concrete Table Top 5- Al…	2021-10-11	Rivercity	Jalan Ipoh	Durian	Condo	Rivercity, Jalan Ipoh - Condo For Sale	Tenanted	-1	-1	End Lot	-1	-1	-1	-1	-1	-1	https://cdn.durianproperty.com.my/images/classified_ads/301467311790643.jpg
370000	1020	2	Partly Furnished	3	Freehold	1	na	Joey Wong	https://www.durianproperty.com.my/classified/3041540/OG-Heights-Condo-for-sale-by-Joey-Wong	Tell Joey Wong you saw this ad from DurianProperty to get best deal.OG Height Condo, LRT AWAN BESAR (1020sf FREEHOLD) Bukit Jalil, OUG -1020sf -CORNER UNIT -FREEHOLD -3 Room 2 Bathroom -1 Car Park -Walking to LRT Awan Besar -Nearby Future Pavillion 2 -Kitchen Cabinet, Build in Wardrobe ***************************** Asking 370k ***************************** Pls Call JY Wong 016-664 5885 Pls Call J…	2021-10-11	OG Heights	Taman Yarl	Durian	Condo	OG Heights, Taman Yarl - Condo For Sale	na	-1	-1	Corner Lot	-1	-1	-1	-1	-1	-1	https://cdn.durianproperty.com.my/images/classified_ads/304154011977309.jpeg
3600000	4950	na	na	na	Freehold	na	REN No.: 22605	Benz Lee	https://www.durianproperty.com.my/classified/3017038/Sunway-Giza-Shop-for-sale-by-benz-lee	Tell benz lee you saw this ad from DurianProperty to get best deal.PJ Sunway Giza Mall No. 2, Jalan PJU 5/14, Kota Damansara, 47810 Petaling Jaya, Selangor Shop For SALE 3 Storey Freehold 22 x 75 (1650 sqft) Total Built Up 4950 sqft Facing Main Road Walking Distance to MRT Station Selling RM3.6Mil ONLY Below Market Price Bank Value at RM5.2 Mil Tenanted Owners Are Welcome To List ☎ *Benz Lee 012 …	2021-10-11	Sunway Giza	Kota Damansara	Durian	Shop	Sunway Giza, Kota Damansara - Shop For Sale	Tenanted	-1	-1	Intermediate Lot	-1	-1	-1	-1	-1	-1	https://cdn.durianproperty.com.my/images/classified_ads/301703811805968.jpeg
3500	1200	2	Fully Furnished	1	Freehold	1	na	-1	https://www.durianproperty.com.my/classified/3019034/Quayside-Seafront-Resort-Condominiums-Condo-for-sale-by-Angeline	You may view Quayside Seafront Resort Condominiums Profile here.	2021-10-11	Quayside Seafront Resort Condominiums	Seri Tanjung Pinang	Durian	Condo	Quayside Seafront Resort Condominiums, Seri Tanjung Pinang - Condo For Sale	Vacant	-1	-1	na	-1	-1	-1	-1	-1	-1	https://cdn.durianproperty.com.my/images/classified_ads/301903411820234.jpg
240000	830	2	Unfurnished	3	Leasehold	1	REN No.: 11682	Keithchew82	https://www.durianproperty.com.my/classified/3012306/Vantage-Point-Condo-for-sale-by-keithchew82	Tell keithchew82 you saw this ad from DurianProperty to get best deal.Keith 019-2668692 Keith 019-2668692 Keith 019-2668692 >Well kept >Below market price >High rental return >Near amenities area >Easy access *** This property is arguably one of the best in its range a MUST view *** * Good Property for Own Stay / Investment . * easy access near to town . * Photo is just for a DISPLAY to protect o…	2021-10-11	Vantage Point	Desa Petaling	Durian	Condo	Vantage Point, Desa Petaling - Condo For Sale	na	-1	-1	na	-1	-1	-1	-1	-1	-1	https://cdn.durianproperty.com.my/images/classified_ads/301230611772738.PNG
210000	650	2	na	3	Leasehold	na	REN No.: 12134	Halimie	https://www.durianproperty.com.my/classified/3001017/Sri-Penara-Apartment-for-sale-by-Halimie	Tell Halimie you saw this ad from DurianProperty to get best deal.SRI PENARA APARTMENT, BANDAR PERMAISURI, CHERAS, KUALA LUMPUR PROPERTY DETAILS: ============== ** Leasehold , Bumi lot ** Low cost unit ** Blok B, Level 16 ** Size : 650 sqft ** 2 Rooms + 1 bathroom + 1 toilet ** Extended Kitchen at 3rd Room ** 24/7 Gated & guarded ** Open carpark ** Maintenance fee : RM65 ** Strata title: Ready FA…	2021-10-11	Sri Penara	Bandar Sri Permaisuri	Durian	Apartment	Sri Penara, Bandar Sri Permaisuri - Apartment For Sale	na	-1	-1	na	-1	-1	-1	-1	-1	-1	https://cdn.durianproperty.com.my/images/classified_ads/300101711694421.jpg
500000	1210	2	Fully Furnished	3	Leasehold	2	REN No.: 43976	Andy Ng	https://www.durianproperty.com.my/classified/3042797/Greenz-One-South-Condo-for-sale-by-Andy-Ng	Tell Andy Ng you saw this ad from DurianProperty to get best deal.2 unit car park Kitchen renovated Greenz (Residensi Flora) @ One South, Seri Kembangan Address: Persiaran Serdang Perdana, Seri Kembangan, 43300, Selangor Kindly contact Andy Ng 0133616818 or whatapps for more information and viewing arrangement.. *Owners are welcome to list. I am one south specialist, Actual unit pictures. Kindly …	2021-10-11	Greenz @ One South	Seri Kembangan	Durian	Condo	Greenz @ One South, Seri Kembangan - Condo For Sale	Vacant	-1	-1	na	-1	-1	-1	-1	-1	-1	https://cdn.durianproperty.com.my/images/classified_ads/304279711988287.jpg
1500000	2500	3	Fully Furnished	5	Freehold	2	REN No.: 30231	Carmanlua	https://www.durianproperty.com.my/classified/3044172/Taman-Paya-Rumput-Perdana-Bungalow-House-for-sale-by-carmanlua	Tell carmanlua you saw this ad from DurianProperty to get best deal.Property Type: 1.5 STOREY BUNGALOW with Swimming POOL > Title: FREEHOLD [Partial Furnishing] > Taman Paya Rumput Perdana @ Melati [intermediate] > Bedroom 6 | Bathroom 3 > Land size: 50 x80 ft > Build up: 2500ft APPROX > BUMI LOT Homestay unit with Partial furnished - Swimming pool , 6 Aircond in room - Renovation at end of 2020 …	2021-10-11	Taman Paya Rumput Perdana	Paya Rumput	Durian	Bungalow House	Taman Paya Rumput Perdana, Paya Rumput - Bungalow House For Sale	Vacant	-1	-1	Intermediate Lot	4000	-1	-1	375	-1	-1	https://cdn.durianproperty.com.my/images/classified_ads/304417211998302.jpg
599000	910	2	Unfurnished	3	Leasehold	2	na	Roy Lim	https://www.durianproperty.com.my/classified/3033550/Taman-Sungai-Besi-Condo-for-sale-by-Roy-Lim	Tell Roy Lim you saw this ad from DurianProperty to get best deal.***** Prime location in the Heart of KL ***** ***** 5 reason y buy from us / Dont miss it in 2018 ***** 1)Numerous shopping mall within 10min - Klcc, Mid Valley, Sunway Velocity, Pavillion 2) Accessible via 3 Major Highway - KL-Seremban Highways, Maju Expressway (MEX), Besraya Highway 3) Walking distance to schools - SJK (C) Tai Th…	2021-10-11	Taman Sungai Besi	Sungai Besi	Durian	Condo	Taman Sungai Besi, Sungai Besi - Condo For Sale	Vacant	-1	-1	End Lot	-1	-1	-1	-1	-1	-1	https://cdn.durianproperty.com.my/images/classified_ads/303355011923385.jpg
270000	850	2	na	3	Leasehold	1	REN No.: 42769	Mohd Syaiful Mazlan	https://www.durianproperty.com.my/classified/3017957/Laguna-Biru-Apartment-for-sale-by-Mohd-Syaiful-Mazlan	Tell Mohd Syaiful Mazlan you saw this ad from DurianProperty to get best deal.[RENOVATED] LAGUNA BIRU FASA 2, RAWANG SELANGOR ====================== Price : RM 270,000 (Nett) Contact: 017-7944137 ====================== PROPERTY DETAILS: -Block F - Level 11 -Type : Apartment -Tenure : Leasthold (Non-Bumi) -Built-up : 850 sqft -Bedroom : 3 -Bathroom : 2 -Living Hall : 1 -Parking : 1 RENOVATED: -Pla…	2021-10-11	Laguna Biru	Rawang	Durian	Apartment	Laguna Biru, Rawang - Apartment For Sale	na	-1	-1	na	-1	-1	-1	-1	-1	-1	https://cdn.durianproperty.com.my/images/classified_ads/301795711811940.jpg
740000	1877	3	Unfurnished	4	Leasehold	4	na	Hana Wahid	https://www.durianproperty.com.my/classified/3022367/Eco-Grandeur-Semi-D-for-sale-by-Hana-Wahid	Tell Hana Wahid you saw this ad from DurianProperty to get best deal.Avenham Garden Endlot Type A Property Details: ============== English Victorian Gated and Guarded Garden Homes With herbs garden backyard Double storey 10 ft extra land 4 Bedrooms 3 Bathrooms . Balcony Build up 1,877 sqft. . Size 45 x 60 Near Uitm Puncak Alam Hospital Uitm - completion date 2020 Dash Highway link to Hartamas - c…	2021-10-11	Eco Grandeur	Bandar Puncak Alam	Durian	Semi D	Eco Grandeur, Bandar Puncak Alam - Semi D For Sale	Vacant	-1	-1	Corner Lot	2700	-1	-1	274.074	-1	-1	https://cdn.durianproperty.com.my/images/classified_ads/302236711844933.jpg
500000	1110	2	Partly Furnished	3	Freehold	2	REN No.: 38742	Deeja Zakaria	https://www.durianproperty.com.my/classified/3019733/Permata-Residence-Condo-for-sale-by-Deeja-Zakaria	Tell Deeja Zakaria you saw this ad from DurianProperty to get best deal.Permata Residence @ Cheras Jalan Suria, Taman Suria Kajang ============================ ASKING PRICE : RM500,000 (Nego) ASKING RENTAL : RM1000/month ============================ Location : Adjecent to Bandar Sg Long Low density residential Condominium with backyard Block B Level 9 Corner unit & near to lift Facing residential…	2021-10-11	Permata Residence	Bandar Sungai Long	Durian	Condo	Permata Residence, Bandar Sungai Long - Condo For Sale	Vacant	-1	-1	Corner Lot	-1	-1	-1	-1	-1	-1	https://cdn.durianproperty.com.my/images/classified_ads/301973311825819.jpg
640000	1260	3	Partly Furnished	3	Leasehold	2	na	Angelica Lim	https://www.durianproperty.com.my/classified/3049429/Bukit-Ampang-Permai-Condo-for-sale-by-Angelica-Lim	Tell Angelica Lim you saw this ad from DurianProperty to get best deal.@ The Only One Property WIth The Perfect Union of Nature And Urban Life! @ Grand Developer & Luxury Lifestyle! - Size:- 957 sqf t/ 1,129 sqft / 1,538 sqft* - 3R2B & 4R3B - Branded Developer Malton (Developer of Pavilion KL) - 2 Carparks - Multi-tier security - 24/7 CCTV surveillance - Low density - High Class / Luxury Design -…	2021-10-11	Bukit Ampang Permai	Ampang	Durian	Condo	Bukit Ampang Permai, Ampang - Condo For Sale	na	-1	-1	na	-1	-1	-1	-1	-1	-1	https://cdn.durianproperty.com.my/images/classified_ads/304942912032557.JPG
1550000	348480	na	na	na	Freehold	na	na	-1	https://www.durianproperty.com.my/classified/2966390/Muallim-Agriculture-Land-for-sale-by-Gary-Chow	Tell Gary Chow you saw this ad from DurianProperty to get best deal.Description Type : Freehold Oil Palm Land Tanjong Malim Land Size : 8 Arce + Tenure : Freehold Land : Flat & Gentle Slope District : Mualim Next to Plus highway Ideal land convert to Orchard (eg : planting durians, jack fruits and others fruits) Sutaible for Petrol Station Approx 1 hour from Kuala Lumpur Approx 10 min from Tanjon…	2021-10-11	Muallim	Perak	Durian	Agriculture Land	Muallim, Perak - Agriculture Land For Sale	na	-1	-1	na	-1	-1	-1	-1	-1	-1	https://cdn.durianproperty.com.my/images/classified_ads/296639011976569.jpg
3900000	7200	na	na	na	Freehold	na	REN No.: 15525	Jimmy Goh	https://www.durianproperty.com.my/classified/2874916/Kundang-Jaya-Semi-D-Factory-for-sale-by-Jimmy-Goh	Tell Jimmy Goh you saw this ad from DurianProperty to get best deal.1.5 Storey Bungalow Factory (Corner) Kawasan Perindustri Kundang, Kundang Jaya, Rawang (Q 129) @ Land Area: 20,000 sf @ Built UP : 7,200 sf (Include Office 30x60 1,800sf) @ Power Supply: 150 @ Freehold Near by: - Kundang Jaya - Kawasan Perindustrian Kundang - Bandar Baru Kundang - Kampung Baru Kundang Accessibilty: ~ Jalan Kampun…	2021-10-11	Kundang Jaya	Rawang	Durian	Factory	Kundang Jaya, Rawang - Semi-D Factory For Sale	na	-1	-1	na	20000	-1	-1	195	-1	-1	https://cdn.durianproperty.com.my/images/classified_ads/287491610924890.jpg
11848320	148104	na	na	na	Freehold	na	REN No.: PEA 2560	Sally Wong Sex Lee	https://www.durianproperty.com.my/classified/3003315/Semenyih-Industrial-Land-for-sale-by-Sally-Wong-Sex-Lee	Tell Sally Wong Sex Lee you saw this ad from DurianProperty to get best deal.Jalan Bangi Lama, Semenyih 3.4 Acres Industrial Land Land For Sale Selling Price: RM 11,848,320.00 Kindly Call for viewing: SALLY 016-660 1360 SALLY 016-660 1360 Welcome to visit my property website: Property Details: Land Area: 3.4 Acres (148,104 s.f) Status: Industrial Land Zoning: Industrial Land Tenure: Freehold Pric…	2021-10-11	Semenyih	Selangor	Durian	Industrial Land	Semenyih, Selangor - Industrial Land For Sale	Vacant	-1	-1	na	-1	-1	-1	-1	-1	-1	https://cdn.durianproperty.com.my/images/classified_ads/300331511710005.jpg
780000	1430	3	Partly Furnished	3	Freehold	na	REN No.: e1286	Michelle Poon	https://www.durianproperty.com.my/classified/3007507/The-Leafz-Condo-for-sale-by-Michelle-Poon	Tell Michelle Poon you saw this ad from DurianProperty to get best deal.PROPERTY DETAILS Name: The Leafz Address: Off Jalan Kuchai Lama, Sungai Besi, Kuala Lumpur Developer: Exsim Development Completion Year: 2015 Type: Serviced Apartment Tenure: Freehold No. of Blocks: 3 No. of Storey: 22 No. of Units: 643 Land Area: 3.3 acres Built-up: 750 - 1,500 sf Maintenance Fee: RM0.44 psf Launch Price: Fr…	2021-10-11	The Leafz	Sungai Besi	Durian	Condo	The Leafz, Sungai Besi - Condo For Sale	Tenanted	-1	-1	Corner Lot	-1	-1	-1	-1	-1	-1	https://cdn.durianproperty.com.my/images/classified_ads/300750711739846.JPG
530000	1980	3	Partly Furnished	4	Freehold	2	REN No.: 29391	Rin Rini	https://www.durianproperty.com.my/classified/3025222/Kota-Warisan-Terrace-House-for-sale-by-Rin-Rini	Tell Rin Rini you saw this ad from DurianProperty to get best deal.Freehold 2 Storey Terrace @ Warisan Indah, Kota Warisan, Sepang Asking Price: RM530k (Negotiable) PROPERTY DETAILS Type: Intermediate Terrace Tenure: Freehold Title: Individual/Bumi Lot Land title: Residential Built up: 1,980 sqft Land Area: 1,650 sqft (22x75) 4 Bedroom 3 Bathrooms AMENITIES - Opposite KIP Mall Kota Warisan (5minu…	2021-10-11	Kota Warisan	Sepang	Durian	Terrace House	Kota Warisan, Sepang - Terrace House For Sale	na	-1	-1	Intermediate Lot	1650	-1	-1	321.212	-1	-1	https://cdn.durianproperty.com.my/images/classified_ads/302522211866907.jpg
250000	818	2	na	3	Freehold	0	na	Yazzer86	https://www.durianproperty.com.my/classified/3008859/Taman-Sri-Murni-Fasa-1-Apartment-for-sale-by-yazzer86	Tell yazzer86 you saw this ad from DurianProperty to get best deal.APARTMENT TAMAN SRI MURNI FASA 2, SELAYANG ASKING PRICE: RM 250,000 ======================== DETAIL PROPERTY : ----------------------------- - Apartment/Flat - Freehold - Bumi Lot - 3 Bedroom - 2 Bathroom - 818 - Level 16 - Unit ada Balcony ( facing 99 Wonderland Park ) FACILITIES ----------------- - Swimming Pool - Playground - M…	2021-10-11	Taman Sri Murni Fasa 1	Batu Caves	Durian	Apartment	Taman Sri Murni Fasa 1, Batu Caves - Apartment For Sale	Vacant	-1	-1	na	-1	-1	-1	-1	-1	-1	https://cdn.durianproperty.com.my/images/classified_ads/300885911748031.jpg
3200000	4500	5+	Partly Furnished	5 + 1	Freehold	na	REN No.: PEA1332	George Loh	https://www.durianproperty.com.my/classified/2779272/Changkat-Kiara-Semi-D-for-sale-by-GEORGE-LOH	Tell GEORGE LOH you saw this ad from DurianProperty to get best deal.3 Story Semi-D @ Rimbun For Sale ! RM 3.2 mill. Price negotiable Owner occupying, ID renovation 200k exclude furniture fully back extended Land Size : 40x90 build up : 4700sq 5+1 bedroom, 6 Bathroom Property Details • Name: Changkat Kiara • Developer: Plenitude Kiara • Type: Semi-D & Bungalow • Tenure: Freehold • No. of Units o …	2021-10-11	Changkat Kiara	Dutamas	Durian	Semi D	Changkat Kiara, Dutamas - Semi D For Sale	na	-1	-1	Intermediate Lot	3600	-1	-1	888.889	-1	-1	https://cdn.durianproperty.com.my/images/classified_ads/277927210434046.jpg
490000	1260	2	Fully Furnished	3	Leasehold	1	REN No.: 13793	Norhasniza Binti Norruhadi	https://www.durianproperty.com.my/classified/3038317/Prima-Setapak-I-Condo-for-sale-by-norhasniza-binti-norruhadi	Tell norhasniza binti norruhadi you saw this ad from DurianProperty to get best deal.Nearby amenities : - KL Festival City Mall, AEON Jaya Jusco, AEON Big, Platinum Walk - JPJ, Puspakom, LHDN, KWSP - TAR College - SK Setapak Indah, and SMK Setapak Indah - Banks, restaurants, clinics - LRT Taman Melati - Uptown Danau Kota - Surau, Masjid - Columbia Asia Hospital Accessibility : - Jalan Genting Kel…	2021-10-11	Prima Setapak I	Setapak	Durian	Condo	Prima Setapak I, Setapak - Condo For Sale	Owner Occupied	-1	-1	na	-1	-1	-1	-1	-1	-1	https://cdn.durianproperty.com.my/images/classified_ads/303831711954619.jpg
850000	2300	5	Partly Furnished	5	Freehold	4	na	Seah	https://www.durianproperty.com.my/classified/3016841/Park-View-Residences-Semi-D-for-sale-by-Seah	Tell Seah you saw this ad from DurianProperty to get best deal.Park View Residences @ Juru Auto-City 2 Sty Semi-D ** CORNER ** Bu : 2312 sf La : 3670 sf 5 Room 5 Bathroom Sell Rm 850 k Rent Rm 1500 Facilities: - Gym - Jogging Track - Swimming Pool - Kids Playground - Guarded& Gated - Accessibility: * 1 min drive to Juru Auto-City, Prai Industrial Zone * 2 mins drive to Juru Toll * 5 mins drive to…	2021-10-11	Park View Residences	Juru	Durian	Semi D	Park View Residences, Juru - Semi D For Sale	Vacant	-1	-1	Corner Lot	3600	-1	-1	236.111	-1	-1	https://cdn.durianproperty.com.my/images/classified_ads/301684111804139.jpg
378888	2400	3	na	4	Freehold	2	na	-1	https://www.durianproperty.com.my/classified/3028508/Bandar-Baru-Bangi-Terrace-House-for-sale-by-jesstan	Tell jesstan you saw this ad from DurianProperty to get best deal.Big Landed House High Cash Back 0%Downpayment 24 hours Gated Guarded Free Swimming Pool , GymRoom... Special Sales Package- -FREE - SPA Legal Fees - SPA Stamp Duty Fees - Loan Legal Fees - Loan Stamp Duty Fees - MOT & MOFYou may view Bandar Baru Bangi Profile here.	2021-10-11	Bandar Baru Bangi	Bangi	Durian	Terrace House	Bandar Baru Bangi, Bangi - Terrace House For Sale	na	-1	-1	Intermediate Lot	1650	-1	-1	229.629	-1	-1	https://cdn.durianproperty.com.my/images/classified_ads/302850811889677.jpg
350000	1300	2	Partly Furnished	3	Freehold	na	REN No.: 15084	En. Iszsyam	https://www.durianproperty.com.my/classified/3003055/Taman-Pelangi-Semenyih-Terrace-House-for-sale-by-En-Iszsyam	Tell En. Iszsyam you saw this ad from DurianProperty to get best deal.[ TITLE ] : SUPERB! - 1Sty HOUSE ( FREEHOLD ) + ( RENOVATED ) Tmn Pelangi SEMENYIH LOKASI : Taman Pelangi Semenyih . Details: ~ Status :Freehold (Bumi Lot) ~ Type :Single Storey (Intermediate) ~ Land area :20 x 65 ~ Built up :1300 sqft ~ Bedroom : 3 ~ Bathrooms :2 ~ Renovation : (kitchen cabinet, plaster ceiling dkt hall, wroug…	2021-10-11	Taman Pelangi Semenyih	Semenyih	Durian	Terrace House	Taman Pelangi Semenyih, Semenyih - Terrace House For Sale	Owner Occupied	-1	-1	Intermediate Lot	1300	-1	-1	269.231	-1	-1	https://cdn.durianproperty.com.my/images/classified_ads/300305511707988.jpg
770000	2038	3	Partly Furnished	4	Freehold	na	REN No.: PEA1699	Zuraini Bin Zallin	https://www.durianproperty.com.my/classified/3000497/S2-Heights-Terrace-House-for-sale-by-Zuraini-bin-Zallin	Tell Zuraini bin Zallin you saw this ad from DurianProperty to get best deal.[For Sale] Corner Lot Double Storey Terrace House,S2 Heights Seremban Details: > Type: Corner Lot Double Storey Terrace House > No. of Storey: 2 > Land Area: 3938 sqft > Build up : 2038 sqft > 4 Bedrooms > 3 Bathrooms > Freehold > Bumi Lot > Kitchen cabinet with cooker hood and hob, dining table, sofa > Build in wardrobe…	2021-10-11	S2 Heights	Seremban 2	Durian	Terrace House	S2 Heights, Seremban 2 - Terrace House For Sale	na	-1	-1	Corner Lot	3938	-1	-1	195.531	-1	-1	https://cdn.durianproperty.com.my/images/classified_ads/300049711690963.jpeg
315000	935	2	Unfurnished	3	Leasehold	1	na	Wayne Lee	https://www.durianproperty.com.my/classified/3044619/Residensi-PR1MA-Alam-Damai-Serviced-Residence-for-sale-by-Wayne-Lee	Tell Wayne Lee you saw this ad from DurianProperty to get best deal.PR1MA Alam Damai HOC Package: Better Offer, Free SPA Fee, Free MOT & Free Stamping Property Details : - 935sf - 3 Bedroom, 2 Bathroom - Nice View - 1 Covered Car Park - Move In Condition - Sale: RM315k ++ - Rental : RM 1,000 ++ Accessibility: - Convenient access to Connaught, Taman Len Sen, Tun Hussien Onn, Balakong, Seri Kembang…	2021-10-11	Residensi PR1MA Alam Damai	Alam Damai	Durian	Serviced Residence	Residensi PR1MA Alam Damai, Alam Damai - Serviced Residence For Sale	na	-1	-1	na	-1	-1	-1	-1	-1	-1	https://cdn.durianproperty.com.my/images/classified_ads/304461912000847.jpg
495000	1600	3	Partly Furnished	4	na	5	na	Wilson Chin	https://www.durianproperty.com.my/classified/3025101/Hill-park-Shah-Alam-North-Terrace-House-for-sale-by-Wilson-Chin	Tell Wilson Chin you saw this ad from DurianProperty to get best deal.New Launch Double Storey Terrace Landed House @ HillPark Shah Alam North Project details: - 4 Bedrooms 3 Bathrooms - Long car porch - Practical layout - Corner & End unit available Attractive Packages & Prime Location: - A stone away from HillPark Avenue ( Commercial Area ) - 1KM to UITM Selangor - Primary & Secondary schools i…	2021-10-11	Hill park @ Shah Alam North	Puncak Alam	Durian	Terrace House	Hill park @ Shah Alam North, Puncak Alam - Terrace House For Sale	Vacant	-1	-1	End Lot	-1	-1	-1	-1	-1	-1	https://cdn.durianproperty.com.my/images/classified_ads/302510111865992.jpg
455000	1800	3	Unfurnished	4	Freehold	na	na	Nurulfarahana Binti Solikin	https://www.durianproperty.com.my/classified/3027670/Bandar-Baru-Salak-Tinggi-Terrace-House-for-sale-by-NURULFARAHANA-BINTI-SOLIKIN	Tell NURULFARAHANA BINTI SOLIKIN you saw this ad from DurianProperty to get best deal.For Sale‼️ Double Storey Taman Salak Baiduri, Salak Tinggi Sepang (End Lot with Extra Land) =================== Asking Price: RM455k =================== Property Details: - Type: Double Storey (End Lot Extra Land 5ft) - Built up: 1800sqft - Land Area: 20 x 65 - 4 Bedrooms - 3 Bathrooms - Freehold | Malay Reserve…	2021-10-11	Bandar Baru Salak Tinggi	Sepang	Durian	Terrace House	Bandar Baru Salak Tinggi, Sepang - Terrace House For Sale	Vacant	-1	-1	End Lot	1300	-1	-1	350	-1	-1	https://cdn.durianproperty.com.my/images/classified_ads/302767011883871.jpg
300000	1000	2	Fully Furnished	2	na	2	REN No.: REN14407	Alice Tan	https://www.durianproperty.com.my/classified/3004352/Publika-Condo-for-sale-by-Alice-Tan	Tell Alice Tan you saw this ad from DurianProperty to get best deal.Starting Price : Rm300K [Freehold] KL City Luxury Condominium [ Low Density @ Cashback + Rebate ] Package : Zero Down Payment 100% Loan With Cash Back !!! Freehold Free 2-3 Carpark per unit Free MOT Free All Legal Fees Project Info : 5 Star Facilities 732 - 1302 4 Room - 3 Bath [ DualKey ] Amenities 5 Min To Mont Kiara 10 Min To …	2021-10-11	Publika	Kuala Lumpur	Durian	Condo	Publika, Kuala Lumpur - Condo For Sale	na	-1	-1	Intermediate Lot	-1	-1	-1	-1	-1	-1	https://cdn.durianproperty.com.my/images/classified_ads/300435211716630.jpg
450000	1210	3	Unfurnished	3	Leasehold	na	REN No.: 16129	Lilian Tan	https://www.durianproperty.com.my/classified/3029287/Bandar-Baru-Sri-Petaling-Terrace-House-for-sale-by-Lilian-Tan	Tell Lilian Tan you saw this ad from DurianProperty to get best deal.Bandar Baru Seri Petaling 3 bedrooms, 2 Bathroom 1 toilet Corner unit Please contact Lilian 0122018319You may view Bandar Baru Sri Petaling Profile here.	2021-10-11	Bandar Baru Sri Petaling	Sri Petaling	Durian	Terrace House	Bandar Baru Sri Petaling, Sri Petaling - Terrace House For Sale	Vacant	-1	-1	Corner Lot	2099	-1	-1	214.388	-1	-1	https://cdn.durianproperty.com.my/images/classified_ads/302928711894769.jpeg
420000	6000	na	na	na	Leasehold	na	REN No.: 27002	Izzaitie Zakaria	https://www.durianproperty.com.my/classified/3020109/Putrajaya-Residential-Land-for-sale-by-Izzaitie-Zakaria	Tell Izzaitie Zakaria you saw this ad from DurianProperty to get best deal.FOR SALE : BUNGALOW LOTS NEAR PUTRAJAYA GREAT LOCATION : BUNGALOW LOTS ON THE HIGHEST PEAK BORDER OF PRESINT 17 PUTRAJAYA TOTAL UNIT : 57 UNIT ONLY TITLE :INDIVIDU LEASEHOLD MALAY RESERVE LOKASI : BORDER SEPANG / PRESINT 17 PUTRAJAYA WITH NICE SCENERY 2 min TO ALAMANDA SHOPPING CENTRE PUTRAJAYA. Price from : RM 62 - 75 per…	2021-10-11	Putrajaya	Selangor	Durian	Residential Land	Putrajaya, Selangor - Residential Land For Sale	na	-1	-1	na	-1	-1	-1	-1	-1	-1	https://cdn.durianproperty.com.my/images/classified_ads/302010911828518.jpg
430000	920	2	Partly Furnished	3	Freehold	1	na	Sia Yiik Luk	https://www.durianproperty.com.my/classified/3050492/Angkasa-Condominiums-Condo-for-sale-by-Sia-Yiik-Luk	Tell Sia Yiik Luk you saw this ad from DurianProperty to get best deal.Angkasa Condominiums, Cheras. >3-bedroom W 2-bathroom >920 sf each unit. >tenanted especially to the UCSI students. >neighbors Giant Hypermarket Taman Connaught & University College International Sedaya. >It enjoys the nearest distance to University College International Sedaya. >Other from UCSI, there are a few school located…	2021-10-11	Angkasa Condominiums	Cheras	Durian	Condo	Angkasa Condominiums, Cheras - Condo For Sale	Tenanted	-1	-1	Intermediate Lot	-1	-1	-1	-1	-1	-1	https://cdn.durianproperty.com.my/images/classified_ads/305049212040349.jpg
525000	1550	3	Partly Furnished	3	na	2	na	Gilian	https://www.durianproperty.com.my/classified/3001073/Ampang-Puri-Condo-for-sale-by-Gilian	Tell Gilian you saw this ad from DurianProperty to get best deal.⚠️Below Market Value 30%⚠️ Limited unit ❗❗ •3 Rooms 3 Bathrooms (Every rooms can fit in king size bed) •1073 - 1800Sqft •4.56 Acres Natural Park •Super Low Density(150 UNITS) •3 Tier Security System • 2/3Car parks(Side by side) •300Meter Access Highway to Interchange SUKE Highway(2min) •Road to PJ / Damansara only 20min • Undergroun…	2021-10-11	Ampang Puri	Ampang Hilir	Durian	Condo	Ampang Puri, Ampang Hilir - Condo For Sale	Vacant	-1	-1	Corner Lot	-1	-1	-1	-1	-1	-1	https://cdn.durianproperty.com.my/images/classified_ads/300107311694842.JPG
470000	1300	2	Partly Furnished	4	Freehold	na	REN No.: 24492	Azrul Ismail	https://www.durianproperty.com.my/classified/3023694/Taman-Sri-Gombak-Terrace-House-for-sale-by-Azrul-Ismail	Tell Azrul Ismail you saw this ad from DurianProperty to get best deal.FULLY RENOVATED | FREEHOLD | NICE UNIT . FOR SALE: 2 Storey Taman Sri Gombak Fasa 10 Taman Sri Gombak . =========================== ASKING PRICE: RM 470,000 (Nett) =========================== . DETAILS: - 2 Storey Terrace House - Non Bumi Lot - Freehold - Fully Renovated - Renovation Cost RM 90k - Built up : 1,300 Sqft - Land …	2021-10-11	Taman Sri Gombak	Batu Caves	Durian	Terrace House	Taman Sri Gombak, Batu Caves - Terrace House For Sale	Vacant	-1	-1	na	770	-1	-1	610.39	-1	-1	https://cdn.durianproperty.com.my/images/classified_ads/302369411855820.jpg
450000	1110	2	Partly Furnished	4	Leasehold	na	na	Raja Farah Izzaty Binti Raja Idzhar	https://www.durianproperty.com.my/classified/3006604/Taman-Desa-Salak-Pekerti-Semi-D-for-sale-by-Raja-Farah-Izzaty-binti-Raja-Idzhar	Tell Raja Farah Izzaty binti Raja Idzhar you saw this ad from DurianProperty to get best deal.SEMI D SETINGKAT DESA SALAK PEKERTI SEPANG, JALAN SP 16 ====ASKING PRICE: RM 450,000 nego==== DETAILS: -Leasehold (Rizab Melayu) -Luas tanah: 35 x 76 @ 2,671 sqft -Luas binaan: 1,110 sqft -4 Bilik & 2 Bilik air -Maintenance RM 70/bulanan FASILITI -Gated & guarded -Padang permainan -Surau An-Nur -Balairay…	2021-10-11	Taman Desa Salak Pekerti	Sepang	Durian	Semi D	Taman Desa Salak Pekerti, Sepang - Semi D For Sale	Tenanted	-1	-1	na	2671	-1	-1	168.476	-1	-1	https://cdn.durianproperty.com.my/images/classified_ads/300660411733535.jpg
350000	650	2	Fully Furnished	3	Freehold	1	REN No.: 37888	Daniel Koay Liam Yew	https://www.durianproperty.com.my/classified/3025962/Mutiara-Vista-Condo-for-sale-by-Daniel-Koay-Liam-Yew	Tell Daniel Koay Liam Yew you saw this ad from DurianProperty to get best deal.DISCLAIMER: This is a REAL ADVERTISEMENT and you DESERVE THE REAL INFORMATION. I DON'T advertise fake listing / price / fake pictures to solicit client. Thank you Taman Mutiara Vista @ Jelutong - Nearby: Aspen Residence, Skyview Residence, Damai Vista, Straits Garden, Harmony View, Symphony Park, Taman Kheng Tian and e…	2021-10-11	Mutiara Vista	Jelutong	Durian	Condo	Mutiara Vista, Jelutong - Condo For Sale	na	-1	-1	na	-1	-1	-1	-1	-1	-1	https://cdn.durianproperty.com.my/images/classified_ads/302596211872555.jpg
260000	226947	na	na	na	Freehold	na	REN No.: 00149	Sanusi	https://www.durianproperty.com.my/classified/3002290/Pahang-Agriculture-Land-for-sale-by-sanusi	Tell sanusi you saw this ad from DurianProperty to get best deal.LADANG SAWIT KG PAYA SOK TEMERLOH * Harga 260k * Luas 5.21 ekar * Freehold Non Bumi * Umur sawit 30 tahun * Lebih kurang 200 meter masuk ke dalam * Jerantut 25 km * Temerloh 52 km * Plaza Tol Temerloh 42 km For Details & Viewing, please call/sms/ whatsapp: SANUSI 017-6029400 REN 00149 Real Estate Negotiator Afz Realty Sdn Bhd Vepm (…	2021-10-11	Pahang	Malaysia	Durian	Agriculture Land	Pahang, Malaysia - Agriculture Land For Sale	na	-1	-1	na	-1	-1	-1	-1	-1	-1	https://cdn.durianproperty.com.my/images/classified_ads/300229011702871.jpg
500000	1600	3	Partly Furnished	4	Freehold	na	REN No.: 15084	En. Iszsyam	https://www.durianproperty.com.my/classified/3005014/Taman-Semenyih-Mewah-Terrace-House-for-sale-by-En-Iszsyam	Tell En. Iszsyam you saw this ad from DurianProperty to get best deal.[ TITLE ] : SUPERB ! - 2Sty House ( RENOVATED ) + ( 22'x70') Taman Semenyih Mewah LOCATION : Taman Semenyih Mewah Fasa 2 . :: DETAILS :: - DOUBLE STOREY HOUSE Intermidiate Freehold Bumi Lot 4 Room 3 Bathroom Built up 22 x 70 1600sqft approx Extended Kitchen Kitchen Cabinet Built in Wardrobe Water Filter Water Heater Autogate Ai…	2021-10-11	Taman Semenyih Mewah	Semenyih	Durian	Terrace House	Taman Semenyih Mewah, Semenyih - Terrace House For Sale	Owner Occupied	-1	-1	Intermediate Lot	1450	-1	-1	344.828	-1	-1	https://cdn.durianproperty.com.my/images/classified_ads/300501411721519.jpg
178000	747	2	Unfurnished	3	Leasehold	na	na	Jackson Esz	https://www.durianproperty.com.my/classified/3047743/Putra-Impian-Apartment-Apartment-for-sale-by-Jackson-ESZ	Tell Jackson ESZ you saw this ad from DurianProperty to get best deal.************************************************* Putra Impian Apartment @ Tmn Pinggiran Putra - For SALE ************************************************* Location: " Pangsapuri Putra Impian ", Jalan PP 39, Taman Pinggiran Putra, 43300 Seri Kembangan, Selangor. - 5 Storey Walk Up Apartment - Block : D - 5th Floor ( Highest ) -…	2021-10-11	Putra Impian Apartment	Bandar Putra Permai	Durian	Apartment	Putra Impian Apartment, Bandar Putra Permai - Apartment For Sale	Tenanted	-1	-1	Intermediate Lot	-1	-1	-1	-1	-1	-1	https://cdn.durianproperty.com.my/images/classified_ads/304774312020225.jpg
480000	1476	3	na	4	Freehold	na	REN No.: 04271	M. Ilyas	https://www.durianproperty.com.my/classified/3030981/Taman-Pelangi-Semenyih-2-Terrace-House-for-sale-by-M-ILYAS	Tell M. ILYAS you saw this ad from DurianProperty to get best deal.For Sale - Double Storey Terrace @ Taman Pelangi Semenyih 2 (Amber), Semenyih, Selangor DETAILS : - FREEHOLD - Land Size: 20 x 70 (1400) - Built Up: 1476 approx. - 4 bedrooms 3 bathrooms - Facing North - Well-kept unit - Vacant unit - Privacy and Peaceful place - Gated & Guarded with Security 24 hours - Playground AMENITIES: - Wal…	2021-10-11	Taman Pelangi Semenyih 2	Semenyih	Durian	Terrace House	Taman Pelangi Semenyih 2, Semenyih - Terrace House For Sale	na	-1	-1	na	1400	-1	-1	342.857	-1	-1	https://cdn.durianproperty.com.my/images/classified_ads/303098111906473.jpeg
800000	1080	3	Unfurnished	4	Leasehold	4	REN No.: 24700	Rozana Property	https://www.durianproperty.com.my/classified/3016251/Taman-Bukit-Indah-Terrace-House-for-sale-by-Rozana-Property	Tell Rozana Property you saw this ad from DurianProperty to get best deal.2STOREY TERRACE TMN BUKIT INDAH AMPANG [CORNER LOT] ======================== ASKING PRICE: RM800,000 ======================== DETAILS : - Leasehold / Bumi Lot - Land area : Approx. 2,615 sqft -Built up: 18' x 60' - 4 bedrooms 3 bathrooms - Basic Unit - Dead-end road (not busy) AMENITIES : - Bukit Indah Mosque - Taman Bukit …	2021-10-11	Taman Bukit Indah	Ampang	Durian	Terrace House	Taman Bukit Indah, Ampang - Terrace House For Sale	Owner Occupied	-1	-1	Corner Lot	2615	-1	-1	305.927	-1	-1	https://cdn.durianproperty.com.my/images/classified_ads/301625111800528.jpg
470000	1129	3	Unfurnished	3	Leasehold	na	REN No.: REN 09826	Kelvin Tan Hh	https://www.durianproperty.com.my/classified/3037377/Mahsuri-Square-Condo-for-sale-by-Kelvin-Tan-HH	Tell Kelvin Tan HH you saw this ad from DurianProperty to get best deal.Mahsuri Square address: Jalan Mahsuri 6, Bayan Baru, 11900, Penang Tenure: Leasehold property. Two block of 29 and 26 storey apartment. Total of 538 units Facilities: Multi storey covered car park Children's Playground Gymnasium room Multi-purpose hall Playground 24 hours security Swimming pool Wading pool ===================…	2021-10-11	Mahsuri Square	Bayan Baru	Durian	Condo	Mahsuri Square, Bayan Baru - Condo For Sale	na	-1	-1	na	-1	-1	-1	-1	-1	-1	https://cdn.durianproperty.com.my/images/classified_ads/303737711948491.jpeg
750000	1532	4	Fully Furnished	3 + 1	Freehold	2	na	Ahmad Fadzley Salleh	https://www.durianproperty.com.my/classified/3041773/Selangor-Terrace-House-for-sale-by-Ahmad-fadzley-Salleh	Tell Ahmad fadzley Salleh you saw this ad from DurianProperty to get best deal.TAMAN BUKIT PERMATA SRI GOMBAK, BATU CAVES FREEHOLD I 2 1/2-Storey Terrace House OFFER PRICE RM 750,000 PROPERTY DETAILS ✔️Land Dimension: 16ft x 75ft (1938 sqft) ✔️Build Up Size: 1532 sqft ✔️3ft Side Land ✔️FREEHOLD ✔️Individual Residential Title ✔️3 + 1 Bedrooms ✔️4 Bathrooms SALE INCLUDE THE FOLLOWING ✔️FULLY FURNIS…	2021-10-11	Selangor	Malaysia	Durian	Terrace House	Selangor, Malaysia - Terrace House For Sale	Tenanted	-1	-1	Intermediate Lot	1938	-1	-1	386.997	-1	-1	https://cdn.durianproperty.com.my/images/classified_ads/304177311979303.jpg
980000	1365	3	Fully Furnished	2	Freehold	1	REN No.: 37888	Daniel Koay Liam Yew	https://www.durianproperty.com.my/classified/3029960/The-Jazz-Residence-Condo-for-sale-by-Daniel-Koay-Liam-Yew	Tell Daniel Koay Liam Yew you saw this ad from DurianProperty to get best deal.DISCLAIMER: This is a REAL ADVERTISEMENT and you DESERVE THE REAL INFORMATION. I DON'T advertise fake listing / price / fake pictures to solicit client. Thank you. Jazz Suite Residence @ Tanjung Tokong - Neighbours: Tanjung Park, City Residence, Straits Quay, Quayside, Andaman, Tamarind, Jazz Residence, Marinox, Brezza…	2021-10-11	The Jazz Residence	Tanjung Tokong	Durian	Condo	The Jazz Residence, Tanjung Tokong - Condo For Sale	na	-1	-1	na	-1	-1	-1	-1	-1	-1	https://cdn.durianproperty.com.my/images/classified_ads/302996011899921.jpg
680000	2000	3	Partly Furnished	4	Leasehold	2	REN No.: 16687	....Engku Mohd Shukri	https://www.durianproperty.com.my/classified/3032089/Bukit-Saujana-Terrace-House-for-sale-by-Engku-Mohd-Shukri	Tell ....Engku Mohd Shukri you saw this ad from DurianProperty to get best deal.2 Storey Brand New Modern Design Terrace Sinar Warisan , Bukit Saujana , Saujana Utama , Sungai Buloh for Sale Property Details: * Terrace Corner * Leasehold Non Bumi Lot * Built Up is 2000 sqft ( Approx.) * Land Area 3000 sqft ( Approx. ) * 4 Bedrooms * 3 Bathrooms * Security fee RM70 per month * Gated and Guarded Am…	2021-10-11	Bukit Saujana	Bandar Saujana Utama	Durian	Terrace House	Bukit Saujana, Bandar Saujana Utama - Terrace House For Sale	Vacant	-1	-1	Corner Lot	3000	-1	-1	226.667	-1	-1	https://cdn.durianproperty.com.my/images/classified_ads/303208911913303.jpg
2115100	3254	na	Fully Furnished	na	Freehold	na	REN No.: 10351	Benny Chew	https://www.durianproperty.com.my/classified/2962532/Oasis-Square-Office-for-sale-by-Benny-Chew	Tell Benny Chew you saw this ad from DurianProperty to get best deal.Oasis Square MSC status Office for sale, Ara Damansara, Petaling Jaya, Selangor All are adjoning unit (Total 19,779 SF), can be sell seperately Each unit's size about: 929SF, 987SF, 1,018SF, 1,040SF, 1,223 SF, 1,280SF Selling: RM 650psf each unit ( around RM 603k - RM 832k each unit) Rental: 987 SF, 1,040SF, 1,280 SF ( 3 adjoini…	2021-10-11	Oasis Square	Ara Damansara	Durian	Office	Oasis Square, Ara Damansara - Office For Sale	Vacant	-1	-1	Corner Lot	-1	-1	-1	-1	-1	-1	https://cdn.durianproperty.com.my/images/classified_ads/296253211435620.jpg
1900000	2625	na	Unfurnished	na	Freehold	na	REN No.: 22605	Benz Lee	https://www.durianproperty.com.my/classified/2937567/BRP-7-Shop-for-sale-by-benz-lee	Tell benz lee you saw this ad from DurianProperty to get best deal.Sungai Buloh BRP 7, Bukit Rahman Putra, 47000 Shah Alam Corner Unit 2 storey Shop Office For Sale Freehold 35 x 75 (2625 sqft) Selling Price RM1.9Mil Owners Are Welcome To List ☎ Benz Lee 012 6868 487 (REN 22605)Please see more of my listings at http://benzlee.myagent.my/.You may view BRP 7 Profile here.	2021-10-11	BRP 7	Bukit Rahman Putra	Durian	Shop	BRP 7, Bukit Rahman Putra - Shop For Sale	na	-1	-1	na	-1	-1	-1	-1	-1	-1	https://cdn.durianproperty.com.my/images/classified_ads/293756711269504.JPG
306100	850	2	Partly Furnished	3	Freehold	2	REN No.: 34912	Raduan Jemain	https://www.durianproperty.com.my/classified/3014716/Acacia-Residences-Apartment-for-sale-by-Raduan-Jemain	Tell Raduan Jemain you saw this ad from DurianProperty to get best deal.ACACIA RESIDENCES @ SALAK PERDANA SEPANG:house::house: Project : Acacia Residence Lokasi: Salak Perdana, Sepang Tenure : Freehold Booking fee : *RM500* Starting price : RM3++k Unit type:- 3 Room 2 Bath 850sqft Security System 24 Hours Security 3 Tier Security Smart Card System Facilities & Services Swimming Pool Changing Room…	2021-10-11	Acacia Residences	Sepang	Durian	Apartment	Acacia Residences, Sepang - Apartment For Sale	na	-1	-1	Intermediate Lot	-1	-1	-1	-1	-1	-1	https://cdn.durianproperty.com.my/images/classified_ads/301471611790937.jpg
465000	1091	2	Fully Furnished	3	Freehold	1	na	Mr. Ching	https://www.durianproperty.com.my/classified/3033835/Kinrara-Mas-Apartment-for-sale-by-Mr-Ching	Tell Mr. Ching you saw this ad from DurianProperty to get best deal.Kinrara Mas Condo ( 1091sf fully furnished ) puchong - 3 bedrooms 2 bathrooms - freehold ( non bumi ) - Built up: 1091sf -fully renovated Move in condition, furnished and fully renovated with fittings, wet and dry kitchen. - 1 carpark - 24 hours security Nearby ioi mall, puchong and shops ============================ Call Mr Chin…	2021-10-11	Kinrara Mas	Bukit Jalil	Durian	Apartment	Kinrara Mas, Bukit Jalil - Apartment For Sale	Vacant	-1	-1	na	-1	-1	-1	-1	-1	-1	https://cdn.durianproperty.com.my/images/classified_ads/303383511925624.jpeg
730000	2210	3	Partly Furnished	4 + 1	Freehold	0	na	Samantha Sun	https://www.durianproperty.com.my/classified/3036366/Selangor-Terrace-House-for-sale-by-samantha-sun	Tell samantha sun you saw this ad from DurianProperty to get best deal.2 Storey Terrace side lot for sale at Bandar Mahkota Ch eras Location: Jln Pahlawan Seksyen 3 34X65 (land area) included 10 feet side land 4 +1 Rooms 3 bathroom guarded service Freehold Easy access to - Cheras - Kajang Highway (5 mins) - SILK Highway (10 mins) - North - South Highway (Plus) Asking price rm730k (Nego) Kindly co…	2021-10-11	Selangor	Malaysia	Durian	Terrace House	Selangor, Malaysia - Terrace House For Sale	Owner Occupied	-1	-1	Corner Lot	-1	-1	-1	-1	-1	-1	https://cdn.durianproperty.com.my/images/classified_ads/303636611941364.jpg
250000	1100	3	Unfurnished	3	Leasehold	2	REN No.: 17186	Ann Siew	https://www.durianproperty.com.my/classified/3033606/Taman-Ipoh-Jaya-Terrace-House-for-sale-by-Ann-Siew	Tell Ann Siew you saw this ad from DurianProperty to get best deal.Double Storey Terrace House at Gunung Rapat Ipoh -Located at Taman Ipoh Jaya -Land size : 20'x55'sqft -Tenure : Leasehold -3bedroom,3bathroom -Renovated -Newly Refurbished -Move in condition -Facing Northwest -Asking Price RM250k(neg) - Amenities:- Close Distance to Bandar Seri Botani Close Distance to Jalan Gopeng Close Distance …	2021-10-11	Taman Ipoh Jaya	Ipoh	Durian	Terrace House	Taman Ipoh Jaya, Ipoh - Terrace House For Sale	Vacant	-1	North-West	Intermediate Lot	-1	-1	-1	-1	-1	-1	https://cdn.durianproperty.com.my/images/classified_ads/303360611923787.jpeg
489000	1800	3	Partly Furnished	4	Freehold	2	REN No.: 45779	Firdhausroslan	https://www.durianproperty.com.my/classified/3023164/Bandar-Sungai-Emas-Terrace-House-for-sale-by-FirdhausRoslan	Tell FirdhausRoslan you saw this ad from DurianProperty to get best deal.FREEHOLD Double Storey End Lot, Bandar Sungai Emas, Banting, Selangor Below Market Value . ===================== Asking Price : RM489,000 ===================== . DETAILS : - Freehold (Non Bumi Lot) - Built Up Area: 1800 sqft - Land Area: 2100 sqft - 4 Bedrooms, 3 Bathrooms - Well maintain - Kitchen Renovated - 4 air conds in…	2021-10-11	Bandar Sungai Emas	Banting	Durian	Terrace House	Bandar Sungai Emas, Banting - Terrace House For Sale	na	-1	-1	na	2100	-1	-1	232.857	-1	-1	https://cdn.durianproperty.com.my/images/classified_ads/302316411851160.jpeg
6776250	10425	na	Fully Furnished	na	Freehold	na	REN No.: 10351	Benny Chew	https://www.durianproperty.com.my/classified/2962531/Oasis-Square-Office-for-sale-by-Benny-Chew	Tell Benny Chew you saw this ad from DurianProperty to get best deal.Oasis Square MSC status Office for sale, Ara Damansara, Petaling Jaya, Selangor All are adjoning unit (Total 19,779 SF), can be sell seperately Each unit's size about: 929SF, 987SF, 1,018SF, 1,040SF, 1,223 SF, 1,280SF Selling: RM 650psf each unit ( around RM 603k - RM 832k each unit) Rental: 987 SF, 1,040SF, 1,280 SF ( 3 adjoini…	2021-10-11	Oasis Square	Ara Damansara	Durian	Office	Oasis Square, Ara Damansara - Office For Sale	Vacant	-1	-1	Corner Lot	-1	-1	-1	-1	-1	-1	https://cdn.durianproperty.com.my/images/classified_ads/296253111435607.jpg
363000	650	2	Fully Furnished	2	Freehold	1	na	Steven Chay	https://www.durianproperty.com.my/classified/3010692/Cyberjaya-SOHO-new-launch-by-Steven-Chay	Tell Steven Chay you saw this ad from DurianProperty to get best deal.Cyberjaya is a town with a science park as the core that forms a key part of the Multimedia Super Corridor in Malaysia. This is mix development project which consists of education, residential and retail.You may view Cyberjaya Profile here.	2021-10-11	na	na	Durian	SOHO	na	na	-1	-1	Intermediate Lot	-1	-1	-1	-1	-1	-1	https://cdn.durianproperty.com.my/images/classified_ads/301069211760657.png
2500000	4400	5+	Fully Furnished	5 + 1	Leasehold	na	REN No.: 15525	Jimmy Goh	https://www.durianproperty.com.my/classified/3037323/Taman-Sri-Bahtera-Bungalow-House-for-sale-by-Jimmy-Goh	Tell Jimmy Goh you saw this ad from DurianProperty to get best deal.Pls Contact Jimmy Goh 0122029977 for listing (Q3014) 2 Storey Bungalow, Taman Sri Bahtera, Taman Cheras @ Land Area: 60 X 80 @ Total Built Up: 4,400 sf - Ground Floor 40 X 55 - 1st Floor 40 X 55 Near by: - Taman Connaught - Taman Taynton - Taman Len Sen - Desa Tun Razak - Alam Damai - Damai Perdana - Leisure Mall Accessibility: -…	2021-10-11	Taman Sri Bahtera	Cheras	Durian	Bungalow House	Taman Sri Bahtera, Cheras - Bungalow House For Sale	Vacant	-1	-1	Intermediate Lot	4800	-1	-1	520.833	-1	-1	https://cdn.durianproperty.com.my/images/classified_ads/303732311948049.jpg
398000	1540	2	Unfurnished	4	Freehold	na	na	Kelvin Chop	https://www.durianproperty.com.my/classified/3021166/Taman-Damai-Jaya-Terrace-House-for-sale-by-Kelvin-Chop	Tell Kelvin Chop you saw this ad from DurianProperty to get best deal.SINGLE STOREY TERRACED HOUSE FOR SALE * Taman Damai Jaya * 4 Bedrooms & 2 Bathrooms * Land Area 22x70 * Unblock view * Facing Northwest * Freehold * No Co broke For This Unit * Owner listing are welcome. We will help you marketing your property and provide professional advice on current market trend. If you\'re interested, kind…	2021-10-11	Taman Damai Jaya	Skudai	Durian	Terrace House	Taman Damai Jaya, Skudai - Terrace House For Sale	na	-1	-1	na	-1	-1	-1	-1	-1	-1	https://cdn.durianproperty.com.my/images/classified_ads/302116611835357.jpg
420000	1009	2	Unfurnished	3	Freehold	2	REN No.: 19102	Firdaus Basiran	https://www.durianproperty.com.my/classified/3012354/Puri-Aiyu-Condo-for-sale-by-Firdaus-Basiran	Tell Firdaus Basiran you saw this ad from DurianProperty to get best deal.Puri Aiyu Condo Seksyen 22 Shah Alam Asking price RM420,000 (Nego) Level: 14 Block: A Size: 1009 Bedrooms: 3 Bathrooms: 2 Title: Freehold, Non Bumi Covered Carpark: 2 (original was 1) Maintenance fee RM180 Strata Facing Federal Highway Kitchen cabinet with hub & hood 4 Airconds 2 Heaters 2 Cupboards FACILITIES : Swimming po…	2021-10-11	Puri Aiyu	Shah Alam	Durian	Condo	Puri Aiyu, Shah Alam - Condo For Sale	Owner Occupied	-1	-1	Intermediate Lot	-1	-1	-1	-1	-1	-1	https://cdn.durianproperty.com.my/images/classified_ads/301235411773171.jpg
565000	1730	2	Partly Furnished	3	Freehold	2	REN No.: 19523	Hazman	https://www.durianproperty.com.my/classified/2676226/Pearl-Avenue-Condo-for-sale-by-Hazman	Tell Hazman you saw this ad from DurianProperty to get best deal.PEARL AVENUE CONDOMINIUM, KAJANG FOR SALE - RM565K =================================================== . + Condominium + Lower Level + Freehold + Built-Up : 1730 sqft + 3 Bedrooms & 2 Bathrooms + 2 Dedicated Inside Building Carparks + Furnished & Fully Renovated : Fully Grilled, Airconds, Water Heaters with Rain Shower, Kitchen Cabi…	2021-10-11	Pearl Avenue	Kajang	Durian	Condo	Pearl Avenue, Kajang - Condo For Sale	na	-1	-1	na	-1	-1	-1	-1	-1	-1	https://cdn.durianproperty.com.my/images/classified_ads/26762269940680.jpg
639900	1600	3	Partly Furnished	4	na	2	REN No.: 27392	Janice Loo	https://www.durianproperty.com.my/classified/3045715/Suria-KLCC-Condo-for-sale-by-Janice-Loo	Tell Janice Loo you saw this ad from DurianProperty to get best deal.Looking For NEW Condo between KLCC & MONT KIARA & PWTC ? New-Launch KLCC Condominium from Top Developer (SPECIAL COVID-19 PACKAGE ) @ Jalan Kuching Feel Free To Call In or Pm In For Limited Unit & Package : Janice Loo - 017-3715988 SUPERB LOW DENSITY ✔1100sqft to 1600sqft super big layout ✔SEMI-D Condo with Corner Lot Unit ✔ Sup…	2021-10-11	Suria KLCC	KLCC	Durian	Condo	Suria KLCC, KLCC - Condo For Sale	na	-1	-1	Corner Lot	-1	-1	-1	-1	-1	-1	https://cdn.durianproperty.com.my/images/classified_ads/304571512008540.jpg
350000	3000	4	Unfurnished	4 + 1	Freehold	2	na	Wilson Property	https://www.durianproperty.com.my/classified/3027186/Old-Klang-Road-Superlink-for-sale-by-Wilson-Property	Tell Wilson Property you saw this ad from DurianProperty to get best deal.(85% SOLD OUT) BELOW MARKET VALUE - THE ONLY AFFORDABLE LUXURY RESORT HOMES ✔ Breathtaking view, find serenity within your urban living homes. AWARD WINNING TOWNSHIP ✔ No financial commitment, high investment appreciation ✔ LAST PHASE DISCOUNT ✔ limited units ✔ Free of all legal fees and NO extra or hidden charges ---------…	2021-10-11	Old Klang Road	Kuala Lumpur	Durian	Superlink	Old Klang Road, Kuala Lumpur - Superlink For Sale	na	-1	-1	Intermediate Lot	1870	-1	-1	187.166	-1	-1	https://cdn.durianproperty.com.my/images/classified_ads/302718611880454.jpeg
1680000	4515	5	Partly Furnished	5	Leasehold	na	REN No.: 16712	Connie Chew	https://www.durianproperty.com.my/classified/2886658/Bandar-Nusaputra-Terrace-House-for-sale-by-Connie-Chew	Tell Connie Chew you saw this ad from DurianProperty to get best deal.Puchongs Superior 3-Storey SuperLinks 3-storey pool villas with a built-up of 4,300 sq ft with private rooftop pool for sale. Grand master bedroom of 550 sq. ft. 4 + 1 BedRooms & 5 Bathrooms Large Car Pouch - Can Park 4 Cars Gated and Guarded homes Yes, We are talking about a 24 x 85 landed home with a rooftop recreation lounge…	2021-10-11	Bandar Nusaputra	Puchong	Durian	Terrace House	Bandar Nusaputra, Puchong - Terrace House For Sale	Vacant	-1	-1	End Lot	2890	-1	-1	581.315	-1	-1	https://cdn.durianproperty.com.my/images/classified_ads/288665810986452.jpg
350000	2150	3	Partly Furnished	4	Freehold	2	REN No.: 25388	Grace Tan	https://www.durianproperty.com.my/classified/3026701/Bukit-Jalil-Superlink-for-sale-by-Grace-Tan	Tell Grace Tan you saw this ad from DurianProperty to get best deal.Free of all charges, absolutely no hidden charges - Refundable booking fee - No Down payment SELLING POINTS : - Gated and guarded, 24 hours surveillance - Free 2 years maintenance fee, broadband wifi, private clubhouse access - Semi Furnished - Township completed with ALL infrastructures ACCESS ✔Freehold 5 minutes to major highwa…	2021-10-11	Bukit Jalil	Kuala Lumpur	Durian	Superlink	Bukit Jalil, Kuala Lumpur - Superlink For Sale	na	-1	-1	Intermediate Lot	1300	-1	-1	269.231	-1	-1	https://cdn.durianproperty.com.my/images/classified_ads/302670111877408.jpg
418000	1200	4	Unfurnished	4	Freehold	na	na	Intan Sasila	https://www.durianproperty.com.my/classified/3040522/D-Mayang-Sari-Terrace-House-for-sale-by-Intan-Sasila	Tell Intan Sasila you saw this ad from DurianProperty to get best deal.NICE HOUSE 2 STOREY Taman Desa Mayang Sari NILAI N9 ======================= ASKING PRICE: RM418,000 (NETT) Klik untuk bertanya dengan lebih lanjut : ======================= PROPERTY DETAILS: 1200 sqft 4 room 4 bathrooms Freehold Non Bumi Lot FACILITIES : ECO lake KITE lawn SHADED playground MAZE garden LINEAR garden AMENITIES:…	2021-10-11	D'Mayang Sari	Nilai	Durian	Terrace House	D'Mayang Sari, Nilai - Terrace House For Sale	na	-1	-1	na	1200	-1	-1	348.333	-1	-1	https://cdn.durianproperty.com.my/images/classified_ads/304052211969341.jpg
415000	1010	2	Partly Furnished	3	Leasehold	2	REN No.: 15800	Ahmad Firdaus	https://www.durianproperty.com.my/classified/3050127/Kristal-Heights-Condo-for-sale-by-ahmad-firdaus	Tell ahmad firdaus you saw this ad from DurianProperty to get best deal.WTS/AHM/344 Kristal Heights Condominium , Seksyen 7, Shah Alam =============================== ASKING PRICE : RM 415,000 =============================== Details : -Type: Condominium -Tenure: Leasehold ,Bumi Lot - Built Up : 1010 sqft -Block: A -Floor: 2 -Bedrooms : 3 -Bathrooms : 2 -Basic Unit -Maintenance Fee : RM 180 -Strat…	2021-10-11	Kristal Heights	Shah Alam	Durian	Condo	Kristal Heights, Shah Alam - Condo For Sale	na	-1	-1	na	-1	-1	-1	-1	-1	-1	https://cdn.durianproperty.com.my/images/classified_ads/305012712037220.jpeg
600000	800	2	Fully Furnished	2	Freehold	2	na	Sit Yong Hao	https://www.durianproperty.com.my/classified/3025832/Suria-Residence-by-Sunsuria-Apartment-for-sale-by-Sit-Yong-Hao	Tell Sit Yong Hao you saw this ad from DurianProperty to get best deal.Suria Residence Bukit Jelutong,Shah Alam For Sale Property Type: 2 Rooms Apartment Tenure: Freehold Land Area: Built Up Area: 800sqft No of Rooms: 2 No of Bathrooms: 2 No of Carpark: 2 Furnishing: Fully Furnished Selling Price: RM600,000 ACCESSBILITY & PUBLIC TRANSPORT :- NPE, LKSA, ELITE,Federal highway, Guthrie Corridor Expr…	2021-10-11	Suria Residence by Sunsuria	Bukit Jelutong	Durian	Apartment	Suria Residence by Sunsuria, Bukit Jelutong - Apartment For Sale	na	-1	-1	na	-1	-1	-1	-1	-1	-1	https://cdn.durianproperty.com.my/images/classified_ads/302583211871621.jpg
310000	900	2	Partly Furnished	3 + 1	Leasehold	2	na	Siti Fasihah Binti Ahmat Kamil	https://www.durianproperty.com.my/classified/3049534/Kampung-Pendamar-Terrace-House-for-sale-by-SITI-FASIHAH-BINTI-AHMAT-KAMIL	Tell SITI FASIHAH BINTI AHMAT KAMIL you saw this ad from DurianProperty to get best deal.WTS Single Storey, Kampung Pendamar, Port Klang, Selangor. Low Cost (Individual Title Ready) =========================== Details of the unit --------------- Land Size: 20’x65’ Build-up: 900 sqft (Approximately) Bedrooms: 3 Store Room: 1 Bathroom: 1+1 Position: Intermediate / Facing Other House Status: Leaseho…	2021-10-11	Kampung Pendamar	Port Klang	Durian	Terrace House	Kampung Pendamar, Port Klang - Terrace House For Sale	na	-1	-1	na	1300	-1	-1	238.462	-1	-1	https://cdn.durianproperty.com.my/images/classified_ads/304953412033388.jpeg
550000	2200	3	Unfurnished	4	Freehold	2	REN No.: 41497	Muna Arshad Property	https://www.durianproperty.com.my/classified/3048090/Section-27-Terrace-House-for-sale-by-Muna-Arshad-Property	Tell Muna Arshad Property you saw this ad from DurianProperty to get best deal.Double Storey Seksyen 27, Shah Alam Taman Bunga Negara (Ada tanah di belakang rumah,boleh berkebun) . PROPERTY DETAILS: - FREEHOLD - Land Area : 22 x 75 (1,650 sf) - Built Up : 2200 sf (approximately) - 4 Bilik 3 Bilik Air . AMENITIES: - Secondary school (SMK Alam Megah) - Nearby commercial area - Mosque -Alam Megah co…	2021-10-11	Section 27	Shah Alam	Durian	Terrace House	Section 27, Shah Alam - Terrace House For Sale	Owner Occupied	-1	-1	Intermediate Lot	1650	-1	-1	333.333	-1	-1	https://cdn.durianproperty.com.my/images/classified_ads/304809012022906.jpg
498888	2200	3	Unfurnished	4	Freehold	2	na	-1	https://www.durianproperty.com.my/classified/2999305/Bandar-Sri-Sendayan-Superlink-for-sale-by-Frankie-Yong	Tell Frankie Yong you saw this ad from DurianProperty to get best deal.- Nearby Shop Lot (Chinese, Malay and Indian Restaurant) - Nearby Shopping Mall (Aeon, Mydin, NSK, Tesco, Mid Valley Concept Megamall, KFC, MCD) - Nearby 7 School Include SK, SJK(C), SJK(T), SMK, Int'l Uni & Cambridge School) - 10min to KLIA & KLIA2 - 25min to KLCC - Freehold - Gated and GuardedYou may view Bandar Sri Sendayan…	2021-10-11	Bandar Sri Sendayan	Seremban	Durian	Superlink	Bandar Sri Sendayan, Seremban - Superlink For Sale	Tenanted	-1	-1	Intermediate Lot	1300	-1	-1	383.76	-1	-1	https://cdn.durianproperty.com.my/images/classified_ads/299930511684731.jpeg
1821761	925	2	Partly Furnished	2 + 1	Freehold	na	REN No.: E2838	Kamal Ag	https://www.durianproperty.com.my/classified/2947321/Core-Residence-Condo-for-sale-by-kamal-AG	Tell kamal AG you saw this ad from DurianProperty to get best deal.GET More Info Now !!! PRICE AD: RM 1,821761.00 / USD 440 K / S$ 596K Only --------------------------------------------------------------------- Name: Core Residences at TRX@ Jalan Tun Razak Type: Condominium Tenure: Freehold Size :925 sqft Central Park View PRICE AD: RM 1,821761.00 / USD 440 K / S$ 596K Only FREE-MM2H Service Fee …	2021-10-11	Core Residence	Imbi	Durian	Condo	Core Residence, Imbi - Condo For Sale	na	-1	-1	Intermediate Lot	-1	-1	-1	-1	-1	-1	https://cdn.durianproperty.com.my/images/classified_ads/294732111333914.jpg
1900000	4200	5	na	4	Freehold	na	na	-1	https://www.durianproperty.com.my/classified/2997016/SS1-Bungalow-House-for-sale-by-SULASTRI-MUSANI	Property Name: 2 Storey Bungalow ss1 Petaling Jaya Price: RM1900000 Ian Scott International vepm (1) 0005You may view SS1 Profile here.	2021-10-11	SS1	Petaling Jaya	Durian	Bungalow House	SS1, Petaling Jaya - Bungalow House For Sale	Vacant	-1	-1	na	6500	-1	-1	292.308	-1	-1	https://cdn.durianproperty.com.my/images/classified_ads/299701611671211.png
565000	1290	2	Fully Furnished	3	Leasehold	1	REN No.: 13793	Norhasniza Binti Norruhadi	https://www.durianproperty.com.my/classified/3041300/Ampang-Putra-Residency-Condo-for-sale-by-norhasniza-binti-norruhadi	Tell norhasniza binti norruhadi you saw this ad from DurianProperty to get best deal.NEARBY AMENITIES: Education: - SMK Seri Ampang - SMK Puteri Ampang - Sayfol International School - International School of Kuala Lumpur Retail Outlets: - Great Eastern Mall - Ampang Point - KLCC - Pavilion Bukit Bintang - The Intermark - The Linc Healthcare: - KPJ Ampang Puteri - Pantai Hospital Ampang - Gleneagl…	2021-10-11	Ampang Putra Residency	Ampang	Durian	Condo	Ampang Putra Residency, Ampang - Condo For Sale	Owner Occupied	-1	-1	Intermediate Lot	-1	-1	-1	-1	-1	-1	https://cdn.durianproperty.com.my/images/classified_ads/304130011975193.jpg
500000	4305	2	Unfurnished	4	Freehold	1	na	-1	https://www.durianproperty.com.my/classified/3010530/Taman-Bukit-Tiram-Terrace-House-for-sale-by-kubaresuaran	You may view Taman Bukit Tiram Profile here.	2021-10-11	Taman Bukit Tiram	Ulu Tiram	Durian	Terrace House	Taman Bukit Tiram, Ulu Tiram - Terrace House For Sale	Tenanted	-1	West	Corner Lot	-1	-1	-1	-1	-1	-1	https://cdn.durianproperty.com.my/images/classified_ads/301053011759380.jpg
370000	2800	3	Unfurnished	4	Leasehold	3	REN No.: 17186	Ann Siew	https://www.durianproperty.com.my/classified/3025857/Taman-Chemor-Idaman-Semi-D-for-sale-by-Ann-Siew	Tell Ann Siew you saw this ad from DurianProperty to get best deal.Single Storey Semi D For Sale at Chemor Ipoh Perak -Located at Taman Chemor Idaman -Land size : 35'x80' -Leasehold until year 2106 -5min to Aeon Klebang -23min to Ipoh town -4bedroom,3bathroom -Unfurnished -Nice environment -Peaceful area -Move in condition -Facing South *****Asking price RM370k For more information kindly contact…	2021-10-11	Taman Chemor Idaman	Chemor	Durian	Semi D	Taman Chemor Idaman, Chemor - Semi D For Sale	Vacant	-1	South	Intermediate Lot	-1	-1	-1	-1	-1	-1	https://cdn.durianproperty.com.my/images/classified_ads/302585711871771.jpg
240000	840	2	Unfurnished	3	Leasehold	1	na	Rosnah Binti Zakaria	https://www.durianproperty.com.my/classified/3034878/Desa-Putra-Apartment-for-sale-by-ROSNAH-BINTI-ZAKARIA	Tell ROSNAH BINTI ZAKARIA you saw this ad from DurianProperty to get best deal.Desa Putra Apartment @ Batu Caves ============================ ASKING PRICE: RM 240,000.00 ============================ DETAILS: - Leasehold, Non Bumi Lot - strata perfected - Size 840 sq ft - Bedroom: 3 - Bathroom: 2 - Car Park provided - Level 4 - Balcony - Maintenance Fee: RM70 - 24 hours security - fully renovate E…	2021-10-11	Desa Putra	Batu Caves	Durian	Apartment	Desa Putra, Batu Caves - Apartment For Sale	na	-1	-1	na	-1	-1	-1	-1	-1	-1	https://cdn.durianproperty.com.my/images/classified_ads/303487811932591.jpg
455000	950	2	Fully Furnished	3	Freehold	2	REN No.: 32928	Ms. Yasmin	https://www.durianproperty.com.my/classified/3047946/Dwiputra-Residences-Condo-for-sale-by-Ms-Yasmin	Tell Ms. Yasmin you saw this ad from DurianProperty to get best deal.[FULLY FURNISHED] DWIPUTRA RESIDENCES PRESINT 15 PUTRAJAYA ====================================== . DETAILS: • Freehold • Built up area : 950sqft • Bedroom : 3 • Bathroom : 2 • Parking bays : 2 • Low density * BLOK B1 * LEVEL 24 out of 25 . FACILITIES: • Parking • 24 Hours Security : single point entry & exit • CCTV • Access Car…	2021-10-11	Dwiputra Residences	Precinct 15	Durian	Condo	Dwiputra Residences, Precinct 15 - Condo For Sale	na	-1	-1	Intermediate Lot	-1	-1	-1	-1	-1	-1	https://cdn.durianproperty.com.my/images/classified_ads/304794612021656.jpg
420000	1027	2	na	3	Freehold	1	na	Adib Farhan	https://www.durianproperty.com.my/classified/3010675/Desa-Idaman-Residences-Condo-for-sale-by-Adib-Farhan	Tell Adib Farhan you saw this ad from DurianProperty to get best deal.For Sale (Ground Floor) Desa Idaman Residence Condominium, Puchong Prima, Puchong +++++++++++++++++++ Asking Price: RM 420k nett +++++++++++++++++++ Details: * FREEHOLD * Non Bumi Lot (Malay Owner) * Ground Floor (sini tiada lif) * Built up: 1027 sqft * 3 bedrooms / 2 bathrooms * Strata Title already under owner's name * 1 park…	2021-10-11	Desa Idaman Residences	Puchong	Durian	Condo	Desa Idaman Residences, Puchong - Condo For Sale	na	-1	-1	na	-1	-1	-1	-1	-1	-1	https://cdn.durianproperty.com.my/images/classified_ads/301067511760515.jpg
425000	948	2	Partly Furnished	3	Freehold	1	na	Alfred Leow	https://www.durianproperty.com.my/classified/3043832/Mercury-Serviced-Apartment-Sentul-Village-Condo-for-sale-by-Alfred-Leow	Tell Alfred Leow you saw this ad from DurianProperty to get best deal.DON'T MISS IT ! PLS DIAL 017-3651686 (ALFRED LEOW) FOR MORE DETAILS & APPOINTMENT =========================================================== - Asking Price : RM425K NEGO DETAILS : ====== - Property Name : Sentul Village Residence - Property Type : Low density luxury resort Condo - Title Type : Freehold - Bumiputera Lot : Non -…	2021-10-11	Mercury Serviced Apartment @ Sentul Village	Sentul	Durian	Condo	Mercury Serviced Apartment @ Sentul Village, Sentul - Condo For Sale	Tenanted	-1	-1	Intermediate Lot	-1	-1	-1	-1	-1	-1	https://cdn.durianproperty.com.my/images/classified_ads/304383211995405.jpg
349000	962	2	Partly Furnished	3	Leasehold	1	REN No.: 40728	Maisara Musa	https://www.durianproperty.com.my/classified/3014334/Grandeur-Tower-Apartment-for-sale-by-Maisara-Musa	Tell Maisara Musa you saw this ad from DurianProperty to get best deal.Grandeur Tower Apartment, Pandan Indah - Kuala Lumpur. * nice interior * walking distance MPAJ. Property detail : 3 Bedrooms 2 Bathrooms 1 Car park 962sqft Leasehold bumi lot Level 10 (medium level) Maintenance fee :RM 130 Amenities : All major banks (CIMB, MAYBANK, AMBANK, RHB, PUBLIC BANK, HONG LEONG) Varieties of F&B shops …	2021-10-11	Grandeur Tower	Pandan	Durian	Apartment	Grandeur Tower, Pandan - Apartment For Sale	na	-1	-1	na	-1	-1	-1	-1	-1	-1	https://cdn.durianproperty.com.my/images/classified_ads/301433411787864.jpg
380000	1800	3	Partly Furnished	4	Freehold	na	REN No.: PEA 2525	Irenesiew Seremban Property Agent	https://www.durianproperty.com.my/classified/3009044/Taman-Permai-3-Terrace-House-for-sale-by-irenesiew-seremban-property-agent	Tell irenesiew seremban property agent you saw this ad from DurianProperty to get best deal.Irene Siew PEA2525 0192257887 CBD Properties Seremban Sdn Bhd Taman Permai 3 - Double storey House For Sale Asking RM380k nego Land size 20x60 4 bedrooms 3 bathrooms Non-Bumi Freehold Renovated and kitchen fully extended Nearby : 3 min to 99 Speedmart 5 min to Palm Mall or KPJ Hospital 10 min to Seremban T…	2021-10-11	Taman Permai 3	Seremban	Durian	Terrace House	Taman Permai 3, Seremban - Terrace House For Sale	na	-1	-1	Intermediate Lot	1200	-1	-1	316.667	-1	-1	https://cdn.durianproperty.com.my/images/classified_ads/300904411749339.jpeg
750000	700	1	Fully Furnished	2	Freehold	1	REN No.: 37888	Daniel Koay Liam Yew	https://www.durianproperty.com.my/classified/3027977/Scott-Residence-Condo-for-sale-by-Daniel-Koay-Liam-Yew	Tell Daniel Koay Liam Yew you saw this ad from DurianProperty to get best deal.DISCLAIMER: This is a REAL ADVERTISEMENT and you DESERVE THE REAL INFORMATION. I DON'T advertise fake listing / price / fake pictures to solicit client. Thank you Scott Residence @ Jalan Macalister, Georgetown - Nearby: Birch Regency, Birch Plaza, Logan Mansion, Tropicana 218 Macalister, 21 Residence, Scott Residence, …	2021-10-11	Scott Residence	Georgetown	Durian	Condo	Scott Residence, Georgetown - Condo For Sale	na	-1	-1	na	-1	-1	-1	-1	-1	-1	https://cdn.durianproperty.com.my/images/classified_ads/302797711885851.jpg
2300000	6000	5+	Partly Furnished	5	Leasehold	na	REN No.: 42227	Mimi Kamil	https://www.durianproperty.com.my/classified/3006649/Section-3-Bungalow-House-for-sale-by-Mimi-Kamil	Tell Mimi Kamil you saw this ad from DurianProperty to get best deal.WTS Bungalow at Shah Alam with Swimming Pool Details -Leasehold -Bumilot -Land Area : 11118 sqft -Build Up : 6000 sqft -Fully Furnished -5 Rooms -7 Bathrooms (2 bathtub) -2 Living Hall Home System -Large Swimming Pool with Water Jet (4pax) -9 Unit Air Cond -High Quality Leather Furniture (Lorenzo) -CCTV and Alarm System -Autogat…	2021-10-11	Section 3	Shah Alam	Durian	Bungalow House	Section 3, Shah Alam - Bungalow House For Sale	Owner Occupied	-1	-1	na	11118	-1	-1	206.872	-1	-1	https://cdn.durianproperty.com.my/images/classified_ads/300664911734005.jpg
290000	700	2	na	3	Freehold	1	na	Mohd Izwan Bin Kansani	https://www.durianproperty.com.my/classified/3028149/Pangsapuri-Putra-Harmoni-Apartment-for-sale-by-Mohd-Izwan-Bin-Kansani	Tell Mohd Izwan Bin Kansani you saw this ad from DurianProperty to get best deal.PANGSAPURI PUTRA HARMONI, PRESINT 9, PUTRAJAYA (RENOVATED) ================================= Asking price : RM 290,000 (NEGO) ================================= Property Details: - Freehold - Build up : 700 sqft - 3 Bedrooms 2 Bathroom - Aircond 2 Unit - Fan on each room - Kitchen cabinet Amenities: - Masjid Putra - S…	2021-10-11	Pangsapuri Putra Harmoni	Precinct 9	Durian	Apartment	Pangsapuri Putra Harmoni, Precinct 9 - Apartment For Sale	na	-1	-1	na	-1	-1	-1	-1	-1	-1	https://cdn.durianproperty.com.my/images/classified_ads/302814911886964.jpeg
300000	1000	2	Fully Furnished	3	Freehold	2	na	Chin Kuan	https://www.durianproperty.com.my/classified/3013256/Taman-Cheras-Condo-for-sale-by-CHIN-KUAN	Tell CHIN KUAN you saw this ad from DurianProperty to get best deal.ZERO entry to own your Dream House PROPERTY DETAILS: -Freehold -0% Down payment -10%Rebate -Fully Furnished -1000 Square Feet -3 Bedroom 2 Bathroom -Greenery Environment -Low Density -Gated & Guard -Free 2 Car Park -Easy Access to Lekas Highway SHOPPING Within 3 Minutes: Econsave ,Tesco ,Mydin ,The Store, McDonald, Starbucks Educ…	2021-10-11	Taman Cheras	Cheras	Durian	Condo	Taman Cheras, Cheras - Condo For Sale	na	-1	-1	na	-1	-1	-1	-1	-1	-1	https://cdn.durianproperty.com.my/images/classified_ads/301325611780888.jpg
500000	1539	3	Unfurnished	3	Freehold	na	na	Marwan Zaim Mat Rawi	https://www.durianproperty.com.my/classified/3010651/The-Strata-Townhouse-Townhouse-for-sale-by-Marwan-Zaim-Mat-Rawi	Tell Marwan Zaim Mat Rawi you saw this ad from DurianProperty to get best deal.WTS The Strata IOI Properties Superlink Townhouse Bandar Puteri Bangi ============================== SELLING PRICE : RM500,000.00 (Nego) ============================== PROPERTY DETAILS: ====== ====== - FREEHOLD / NON BUMI LOT - Built up 1539sqft - Land area: 26 x 65 - 3 bedrooms, 3 bathrooms - Brand New Unit Vacant - L…	2021-10-11	The Strata Townhouse	Bandar Puteri Bangi	Durian	Townhouse	The Strata Townhouse, Bandar Puteri Bangi - Townhouse For Sale	Vacant	-1	-1	Intermediate Lot	1690	-1	-1	295.858	-1	-1	https://cdn.durianproperty.com.my/images/classified_ads/301065111760279.jpg
1100000	1987	4	Unfurnished	4	Leasehold	2	na	Fatin Hanani	https://www.durianproperty.com.my/classified/3044718/Wangsa-Jaya-Terrace-House-for-sale-by-Fatin-Hanani	Tell Fatin Hanani you saw this ad from DurianProperty to get best deal.Double storey terrace, Wangsa Jaya 1 @ Wangsa Maju (Newly renovated, good location) ============================ ASKING PRICE: RM1,100,000.00 (NEGO) CONTACT: Fatin 019-6039890 ============================ DETAILS: - Tenure: Leasehold tenure remaining 84 years (Non-bumi lot) - Built Up: 1987 sq ft (24 x 92) - Land size: 2204 sq…	2021-10-11	Wangsa Jaya	Wangsa Maju	Durian	Terrace House	Wangsa Jaya, Wangsa Maju - Terrace House For Sale	Vacant	-1	-1	Intermediate Lot	2204	-1	-1	499.093	-1	-1	https://cdn.durianproperty.com.my/images/classified_ads/304471812001637.jpg
380000	700	2	Partly Furnished	3	Freehold	na	na	Cl Loh	https://www.durianproperty.com.my/classified/3006850/Taman-Tanjong-Apartment-for-sale-by-CL-Loh	Tell CL Loh you saw this ad from DurianProperty to get best deal.Low density; 5-storey walk-up building Location : Tanjung Bungah Type : Apt Tenure : Freehold Built-up : 700 sq ft Car Park : 1 No. of Bedrooms : 3 No. of Bathrooms : 2 Condition : Basic reno Price : RM380,000.00 (View & offer) Call CL Loh (PEA 0660) at 012 - 493 7415 for viewing!! Website : TODAY PROPERTIES (E(3)1080)Please see mor…	2021-10-11	Taman Tanjong	Tanjung Bungah	Durian	Apartment	Taman Tanjong, Tanjung Bungah - Apartment For Sale	na	-1	-1	na	-1	-1	-1	-1	-1	-1	https://cdn.durianproperty.com.my/images/classified_ads/300685011735281.JPG
650000	1820	na	Unfurnished	na	Leasehold	na	na	Kyo Chua	https://www.durianproperty.com.my/classified/3038742/Gunung-Rapat-Shop-for-sale-by-Kyo-Chua	Tell Kyo Chua you saw this ad from DurianProperty to get best deal.Ipoh Main Road Shop For Sale with Tenanted -Facing main road -26x70 -Located Jalan Gopeng ( Jalan Raja Dr. Nazrin Shah ) -Strategic location -Nearby Petronas petrol station Asking Price only RM 650k Kindly Contact Kyo Chua 012-5106554 or Email at Kyochua@ for arranging viewing purpose. *Welcoming owner drop by your property for Sa…	2021-10-11	Gunung Rapat	Ipoh	Durian	Shop	Gunung Rapat, Ipoh - Shop For Sale	Tenanted	-1	-1	Intermediate Lot	1820	-1	-1	357.143	-1	-1	https://cdn.durianproperty.com.my/images/classified_ads/303874211957910.jpg
75000	581	1	Partly Furnished	2	Leasehold	1	REN No.: 17186	Ann Siew	https://www.durianproperty.com.my/classified/3042343/Ipoh-Garden-East-Flat-Flat-for-sale-by-Ann-Siew	Tell Ann Siew you saw this ad from DurianProperty to get best deal.Flat For Sale at Ipoh Garden East -Located at Ipoh Garden East -Built up : 581sqft -Tenure : Leasehold -2bedroom,1bathroom -Basic condition -Partially Furnished -Blok G -third floor ***Asking Price: RM 75,000 (NEGOTIABLE) Amenities:- Short distance to AEON KINTA CITY, TESCO @IPOH GARDEN and DEGARDEN Short distance to fastfood (McD…	2021-10-11	Ipoh Garden East Flat	Ipoh	Durian	Flat	Ipoh Garden East Flat, Ipoh - Flat For Sale	Vacant	-1	-1	Intermediate Lot	-1	-1	-1	-1	-1	-1	https://cdn.durianproperty.com.my/images/classified_ads/304234311984382.jpeg
2513720	22852	na	na	na	Freehold	na	REN No.: 02313	Nelson Yap	https://www.durianproperty.com.my/classified/3035607/Selangor-Industrial-Land-for-sale-by-Nelson-Yap	Tell Nelson Yap you saw this ad from DurianProperty to get best deal.Kundang Jaya Industrial Park, Rawang, Selangor Few parcels freehold Industrial land for sale Land area 22,852 sq ft Access road ready to build Selling RM 2.513 million (RM110 per sq ft) Please contact Nelson Yap @ 016 3328637 to arrange site visitPlease see more of my listings at http://nelsonyap.myagent.my/.You may view Selango…	2021-10-11	Selangor	Malaysia	Durian	Industrial Land	Selangor, Malaysia - Industrial Land For Sale	Vacant	-1	-1	Intermediate Lot	-1	-1	-1	-1	-1	-1	https://cdn.durianproperty.com.my/images/classified_ads/303560711936625.png
785000	2723	3	Unfurnished	4	Freehold	na	REN No.: 13516	Lee Chin (Ren13516)	https://www.durianproperty.com.my/classified/3028205/Bandar-Damai-Perdana-Terrace-House-for-sale-by-Lee-Chin-REN13516-	Tell Lee Chin (REN13516) you saw this ad from DurianProperty to get best deal.* Bandar Damai Perdana @ Cheras * 2 storey terrace house * Freehold * Land area 2723sf * Extra land 20ft * Basic unit Near amenities : * SJKC Taman Connaught II * Bandar Damai Perdana Police Station, Petronas, Giant Cheras Utama, Econsave Balakong, C180, Columbia Asia Hospital .. * Restaurants, cafe, workshop, salon, tu…	2021-10-11	Bandar Damai Perdana	Cheras	Durian	Terrace House	Bandar Damai Perdana, Cheras - Terrace House For Sale	Tenanted	-1	North-East	Corner Lot	2723	-1	-1	288.285	-1	-1	https://cdn.durianproperty.com.my/images/classified_ads/302820511887343.jpeg
385000	896	2	Partly Furnished	3	Freehold	na	REN No.: 32729	Natira Sulaiman	https://www.durianproperty.com.my/classified/3005421/7-Tree-Seven-Residence-Condo-for-sale-by-NATIRA-SULAIMAN	Tell NATIRA SULAIMAN you saw this ad from DurianProperty to get best deal.CONDOMINIUM 7 TREE SEVEN RESIDENCE, KAJANG-CHERAS FOR SALE 24 HOURS GATED AND GUARDED +FACING PRIVATE SWIMMING POOL + GYMNASIUM + CHILDREN PLAYGROUND + 2 CAR PARK SPACE + ELEVATOR + NEAR TO MRT **Good for staying purposes **Good for investment purposes **Strategic Location **Nice Pool View Condominium Freehold Bumi Lot Size…	2021-10-11	7 Tree Seven Residence	Taman Koperasi Cuepacs	Durian	Condo	7 Tree Seven Residence, Taman Koperasi Cuepacs - Condo For Sale	na	-1	-1	na	-1	-1	-1	-1	-1	-1	https://cdn.durianproperty.com.my/images/classified_ads/300542111724630.jpeg
700000	1200	3	Partly Furnished	4	Freehold	1	REN No.: 20679	Javen Low	https://www.durianproperty.com.my/classified/3018737/Suria-North-Kiara-Condo-for-sale-by-Javen-Low	Tell Javen Low you saw this ad from DurianProperty to get best deal.Suria @ North Kiara by UOA for SALE Duplex Showroom Corner Fully Renovaetd & Fiurnished 100% as per photo 1200sf @ 4 Bedroom & 3 Bathroom Pls call for detail at Javen 017-311 2788 Thanks Suria @ North Kiara is a freehold mixed-use development that comprises serviced suites, shop offices and retail shop lots with rooftop facilitie…	2021-10-11	Suria @ North Kiara	Segambut	Durian	Condo	Suria @ North Kiara, Segambut - Condo For Sale	Vacant	-1	-1	Corner Lot	-1	-1	-1	-1	-1	-1	https://cdn.durianproperty.com.my/images/classified_ads/301873711817879.jpg
190000	1540	2	Unfurnished	3	Freehold	na	na	Kelvin Chop	https://www.durianproperty.com.my/classified/3014749/Taman-Selesa-Jaya-Apartment-for-sale-by-Kelvin-Chop	Tell Kelvin Chop you saw this ad from DurianProperty to get best deal.For Sale : * Selesa Jaya Shoplot Apartment * Jalan silat harimau * 3 Bedrooms 2 Bathrooms * Built Up 1,540 * Freehold * (2nd floor ) top floor * No Co broke For This Unit * Owner listing are welcome. We will help you marketing your property and provide professional advice on current market trend. If you're interested, kindly co…	2021-10-11	Taman Selesa Jaya	Skudai	Durian	Apartment	Taman Selesa Jaya, Skudai - Apartment For Sale	na	-1	-1	na	-1	-1	-1	-1	-1	-1	https://cdn.durianproperty.com.my/images/classified_ads/301474911791148.jpg
558000	872	2	Unfurnished	3	Freehold	1	na	Elyssa Teoh	https://www.durianproperty.com.my/classified/3013265/Tropicana-Bay-Residences-Condo-for-sale-by-Elyssa-Teoh	Tell Elyssa Teoh you saw this ad from DurianProperty to get best deal.Tropicana Bay Residence is located Nearby Queensbay Mall and Free Industrial Zone. Easy access to Bayan Lepas,Bayan baru , Town Area , Penang Bridge. - 872sf - 3 Bedrooms, 2 Bathrooms - Good Air Ventilation - High Floor -Selling below market price at only RM 558k NEGOTIABLE ** Worth Buy Unit ** For more information or vieiwng a…	2021-10-11	Tropicana Bay Residences	Bayan Lepas	Durian	Condo	Tropicana Bay Residences, Bayan Lepas - Condo For Sale	na	-1	-1	na	-1	-1	-1	-1	-1	-1	https://cdn.durianproperty.com.my/images/classified_ads/301326511780946.jpg
498000	2980	4	Unfurnished	4	Freehold	2	na	Jacklyn Chia	https://www.durianproperty.com.my/classified/3028845/Taman-Bandar-Senawang-Terrace-House-for-sale-by-Jacklyn-Chia	Tell Jacklyn Chia you saw this ad from DurianProperty to get best deal.Freehold Double Storey Terrace House ** Senawang ** # 26' × 70' # Built Up 2,980 sf # 4 Bedroom # 4 Bathroom Kindly call / whatsapp for more details Jacklyn : 019-694 5350You may view Taman Bandar Senawang Profile here.	2021-10-11	Taman Bandar Senawang	Senawang	Durian	Terrace House	Taman Bandar Senawang, Senawang - Terrace House For Sale	na	-1	-1	na	1820	-1	-1	273.626	-1	-1	https://cdn.durianproperty.com.my/images/classified_ads/302884511891669.jpeg
239000	3111	2	Unfurnished	3	Freehold	4	REN No.: PEA : 2475	Chris ( Property Seremban )	https://www.durianproperty.com.my/classified/3019734/Taman-Pelangi-Terrace-House-for-sale-by-Chris-Property-Seremban-	Tell Chris ( Property Seremban ) you saw this ad from DurianProperty to get best deal.Special price for cash buyer Corner lot free 7 fruit plants Corner lot FREE with 7 type fruits plant sell together Single storey corner lot Seremban Walk distance to TAFE college , Sikamat , Taman Pelangi Seremban RM 239,000 only Selling together with 1）波罗蜜 Jackfruit tree 2） 红毛丹 Rambutan tree 3）榴莲 Durian tree 4）…	2021-10-11	Taman Pelangi	Seremban	Durian	Terrace House	Taman Pelangi, Seremban - Terrace House For Sale	Vacant	-1	-1	Corner Lot	3111	-1	-1	76.8242	-1	-1	https://cdn.durianproperty.com.my/images/classified_ads/301973411825837.jpeg
90000	650	2	Unfurnished	3	Freehold	na	na	-1	https://www.durianproperty.com.my/classified/2996990/Bandar-Seri-Alam-Flat-for-sale-by-Kelvin-Chop	Flat For Sale : * Seri Alam @ Jalan Tasek 64 至达城 廉价Flat楼出售 * Low Cost Flat For First Time Buyer Only 只限首购族 * 3 Bedrooms 2 Bathrooms 三房两厕 * Built Up 650 面积 * Level 5 五楼 * Original Unit 原装 * Non bumi * Freehold 永久地契 * No Co broke For This Unit * Owner listing are welcome. We will help you marketing your property and provide professional advice on current market trend. If you're interested, kindly c…	2021-10-11	Bandar Seri Alam	Masai	Durian	Flat	Bandar Seri Alam, Masai - Flat For Sale	na	-1	-1	na	-1	-1	-1	-1	-1	-1	https://cdn.durianproperty.com.my/images/classified_ads/299699011670983.jpg
208000	745	2	Unfurnished	3	Freehold	1	na	Nurulfarahana Binti Solikin	https://www.durianproperty.com.my/classified/3027689/Sinar-Apartment-Apartment-for-sale-by-NURULFARAHANA-BINTI-SOLIKIN	Tell NURULFARAHANA BINTI SOLIKIN you saw this ad from DurianProperty to get best deal.FOR SALE : Apartment Sinar, Salak Perdana Bandar Baru Salak Tinggi, Sepang Selangor SEWA BOLEH COVER LOAN!! SANGAT BAIK UNTUK PELABURAN/DUDUK SENDIRI!! JMB PROAKTIF APARTMENT DIJAGA BAIK!! ========================== PRICE : RM208,000 Contact : 013-5903395 (Nurul) ========================== DETAILS - Medium Cost …	2021-10-11	Sinar Apartment	Salak Perdana	Durian	Apartment	Sinar Apartment, Salak Perdana - Apartment For Sale	Vacant	-1	-1	na	-1	-1	-1	-1	-1	-1	https://cdn.durianproperty.com.my/images/classified_ads/302768911884023.jpg
2800000	4000	5	Partly Furnished	6	Freehold	4	REN No.: 40873	Azreen Bin Khalid	https://www.durianproperty.com.my/classified/3043534/Kiara-View-Semi-D-for-sale-by-Azreen-Bin-Khalid	Tell Azreen Bin Khalid you saw this ad from DurianProperty to get best deal.2 Storey Semi D Kiara View, Desa Sri Hartamas ========================== Asking Price RM2,800,000 Negotiable Contact Azreen Khalid 01128145900 ========================== Property details: Build up: 4,000 sqft Land area: 4,500 sqft 5+1 bedrooms 4+1 bathrooms Freehold Malay Reserve Maintenances fees: RM370 Car park: 4 Gated…	2021-10-11	Kiara View	Mont Kiara	Durian	Semi D	Kiara View, Mont Kiara - Semi D For Sale	na	-1	-1	na	4500	-1	-1	622.222	-1	-1	https://cdn.durianproperty.com.my/images/classified_ads/304353411993779.png
239828	850	2	Unfurnished	3	Freehold	na	na	Randau Ds Property	https://www.durianproperty.com.my/classified/3022482/Taman-Pelangi-Indah-Apartment-for-sale-by-Randau-Ds-Property	Tell Randau Ds Property you saw this ad from DurianProperty to get best deal.HARGA BERMULA DARI RM239,828 3 BILIK TIDUR, 2 BILIK AIR REKA BENTUK MODEN DAN PRAKTIKAL PELAN SUSUN ATUR MENARIK MEMBERI KESELESAAN SEISI KELUARGA KEDIAMAN BERKONSEPKAN KETENANGAN DAN KEMODENAN FASILITI MODEN : - SURAU - TAMAN PERMAINAN - TADIKA & TASKA - DEWAN SERBAGUNA - KEDAI LOKASI STRATEGIK : - 1 KM KE PASARAYA MYDI…	2021-10-11	Taman Pelangi Indah	Ulu Tiram	Durian	Apartment	Taman Pelangi Indah, Ulu Tiram - Apartment For Sale	na	-1	-1	na	-1	-1	-1	-1	-1	-1	https://cdn.durianproperty.com.my/images/classified_ads/302248211845749.jpg
1100000	2200	3	Partly Furnished	4	Leasehold	na	REN No.: 23196	Rohani Binti Hamzah	https://www.durianproperty.com.my/classified/3022609/Section-5-Terrace-House-for-sale-by-Rohani-Binti-Hamzah	Tell Rohani Binti Hamzah you saw this ad from DurianProperty to get best deal.WTS Location : Sepah Puteri Seksyen 5, Kota Damansara Type : Double Storey Intermediate Built Up : 2,200 sqft Land Area : 22 x 75 Bedroom : 4 Bathroom : 3 1 Attic Leasehold/Bumi Lot Built in wardrobe Kitchen cabinet in both wet and dry kitchen Plaster ceiling Gated and guarded 24 hours security Amenities nearby : - shop…	2021-10-11	Section 5	Kota Damansara	Durian	Terrace House	Section 5, Kota Damansara - Terrace House For Sale	na	-1	-1	na	1650	-1	-1	666.667	-1	-1	https://cdn.durianproperty.com.my/images/classified_ads/302260911846787.jpg
580000	1416	2	Fully Furnished	4	Leasehold	na	na	-1	https://www.durianproperty.com.my/classified/2996775/Puteri-Court-Condo-for-sale-by-SULASTRI-MUSANI	WTS : *PUTERI COURT AMPANG* , Taman Putra Ampang *BIGGEST Unit with Fully Furnished* ============================== Asking price:RM580,000 (negotiable) DETAILS : - Unit located at 1st Floor - Strata Title provided - Leasehold - Non Bumi Lot - Built-up Area : 1,416sqft (1, + ) - Fully Renovated with extra 200sqft kitchen area - 4 Bedrooms - 2 Bathrooms - 2 Parking lots (extra 1lot parking with fee…	2021-10-11	Puteri Court	Ampang	Durian	Condo	Puteri Court, Ampang - Condo For Sale	na	-1	-1	na	-1	-1	-1	-1	-1	-1	https://cdn.durianproperty.com.my/images/classified_ads/299677511669201.jpeg
500000	1840	3	na	4	Leasehold	na	REN No.: 23196	Rohani Binti Hamzah	https://www.durianproperty.com.my/classified/3017050/Saujana-Puchong-Terrace-House-for-sale-by-Rohani-Binti-Hamzah	Tell Rohani Binti Hamzah you saw this ad from DurianProperty to get best deal.WTS Details: Double Storey TerraceLink House @ Taman Saujana Puchong SP1 Land Area : 1300 sqft Built Up : approx. 1840 sqft Intermediate Leasehold/Bumi Lot 4 Bedrooms 3 Bathrooms Kitchen extended Nearby Amenities: Pusat Commercial Saujana Utama Schools Fast Food Restaurants IOI Mall/Giant/Aeon Big/Tesco IOI Boulevard/Se…	2021-10-11	Saujana Puchong	Puchong	Durian	Terrace House	Saujana Puchong, Puchong - Terrace House For Sale	na	-1	-1	na	1300	-1	-1	384.615	-1	-1	https://cdn.durianproperty.com.my/images/classified_ads/301705011806049.jpeg
440000	442	2	na	1	Leasehold	na	na	-1	https://www.durianproperty.com.my/classified/3036693/Kuala-Lumpur-Apartment-for-sale-by-Niancy	Tell Niancy you saw this ad from DurianProperty to get best deal.Arte mont kiara 1. Sqft: 442sq ft level 8, unit 11 2. No. of bedroom : 1 and bathroom: 2 3. Tower: MK1 4. Asking price for Sell 440k 5. Fully furnished 6. Facing pool 7. Not for rentYou may view Kuala Lumpur Profile here.	2021-10-11	Kuala Lumpur	Malaysia	Durian	Apartment	Kuala Lumpur, Malaysia - Apartment For Sale	na	-1	-1	na	-1	-1	-1	-1	-1	-1	https://cdn.durianproperty.com.my/images/classified_ads/303669311942920.jpeg
472500	2086	3	Unfurnished	4	Leasehold	na	REN No.: 18616	Hafiz Halim	https://www.durianproperty.com.my/classified/3029100/Kota-Puteri-Terrace-House-for-sale-by-Hafiz-Halim	Tell Hafiz Halim you saw this ad from DurianProperty to get best deal.RUMAH 2 TINGKAT 22'x75' PUTERI AIRA @ KOTA PUTERI. BOOKING ONLY RM1000! HARGA DARI RM 472,500 SELEPAS DISKAUN. LIMITED UNIT AVAILABLE! BOOK SEKARANG! PROPERTY DETAILS : - Total unit : 101 - Leasehold Open Tittle (Bumi Lot and Non Bumi Lot) - Keluasan Tanah 22'x75' sf - Keluasan Rumah dari 2,086 sf - 4 Bilik Tidur, 3 Bilik Air P…	2021-10-11	Kota Puteri	Selangor	Durian	Terrace House	Kota Puteri, Selangor - Terrace House For Sale	na	-1	-1	na	1650	-1	-1	286.364	-1	-1	https://cdn.durianproperty.com.my/images/classified_ads/302910011893459.jpg
300000	915	2	Partly Furnished	3	Leasehold	1	REN No.: 19814	Azizi Hana	https://www.durianproperty.com.my/classified/3029579/Pangsapuri-Saujana-Gombak-Apartment-for-sale-by-Azizi-Hana	Tell Azizi Hana you saw this ad from DurianProperty to get best deal.FOR SALE: [CORNER LOT] Pangsapuri Saujana Gombak [BELOW MARKET PRICE] . . ======================= ASKING PRICE: RM300,000 nego ======================= . DETAILS & FEATURES: ------------------------------- * Property Type : A 3-bedroom Apartment * Tenure : Leasehold / Bumi lot * Floor Area : 915 sqft * Bedroom : 3 bedrooms * Bath…	2021-10-11	Pangsapuri Saujana Gombak	Batu Caves	Durian	Apartment	Pangsapuri Saujana Gombak, Batu Caves - Apartment For Sale	na	-1	-1	na	-1	-1	-1	-1	-1	-1	https://cdn.durianproperty.com.my/images/classified_ads/302957911896923.jpg
525000	3500	3	Unfurnished	4	Freehold	na	REN No.: 36646	Effendy Shohaili	https://www.durianproperty.com.my/classified/3019848/Kuala-Terengganu-Bungalow-House-for-sale-by-effendy-shohaili	Tell effendy shohaili you saw this ad from DurianProperty to get best deal.FOR SALE BANGLO SETINGKAT KAMPUNG JATI GONG BADAK KUALA TERENGGANU ASKING PRICE RM 525,000.00 Specifications: Freehold 6223 sqft luas tanah 3500 sqft luas binaan 4 bilik 3 bilik air Kabinet dapur Amenities: Kuala Terengganu Golf Resort UNISZA UMT Industrial Training Institute Arena Sport Centre Uptown Kontena Masjid Tok Je…	2021-10-11	Kuala Terengganu	Terengganu	Durian	Bungalow House	Kuala Terengganu, Terengganu - Bungalow House For Sale	na	-1	-1	na	6223	-1	-1	84.3645	-1	-1	https://cdn.durianproperty.com.my/images/classified_ads/301984811826573.jpg
490000	1400	3	Unfurnished	4	Freehold	na	na	Marina	https://www.durianproperty.com.my/classified/3042179/Taman-Pelangi-Semenyih-2-Terrace-House-for-sale-by-MARINA	Tell MARINA you saw this ad from DurianProperty to get best deal.FOR SALE!!! *2 Storey Terrace Oakberry, Taman Pelangi Semenyih 2, Semenyih* ========================= ASKING PRICE: RM490,000 NETT ========================= *PROPERTY DETAILS:* ================ - Type: 2 Storey Terrace Intermediate - Located at Taman Pelangi Semenyih 2(Oakberry Gate) - Freehold - Land Area: 20 X 70 (1,400 sq. ft.) -…	2021-10-11	Taman Pelangi Semenyih 2	Semenyih	Durian	Terrace House	Taman Pelangi Semenyih 2, Semenyih - Terrace House For Sale	Owner Occupied	-1	-1	Intermediate Lot	1400	-1	-1	350	-1	-1	https://cdn.durianproperty.com.my/images/classified_ads/304217911982888.jpg
2755000	4288	5+	Unfurnished	7	Freehold	5+	REN No.: 20679	Javen Low	https://www.durianproperty.com.my/classified/3018564/Scenaria-North-Kiara-Hills-Terrace-House-for-sale-by-Javen-Low	Tell Javen Low you saw this ad from DurianProperty to get best deal.Scenaria 3 Storey Superlink House FULL RENOVATED UNIT LAST 1 UNIT Corner Unit Land Size 30x85 BU 4288 sqft - 7 Rooms , 8 Bathroom Unit Type : CORNER PROMOTION: - - FREE SPA LEGAL FEES - FREE LOAN AGREEMENT - FREE 12 MONTH LOAN INSTALMENT or 5% Rebare -FREE Extra 3 cover car park Please call for further details and a private visit…	2021-10-11	Scenaria @ North Kiara Hills	Bukit Segambut	Durian	Terrace House	Scenaria @ North Kiara Hills, Bukit Segambut - Terrace House For Sale	Vacant	-1	-1	Corner Lot	2561	-1	-1	1075.75	-1	-1	https://cdn.durianproperty.com.my/images/classified_ads/301856411816619.jpg
578000	1400	5	Partly Furnished	4	Leasehold	na	na	Kelvin Chop	https://www.durianproperty.com.my/classified/3019559/Taman-Ehsan-Jaya-Terrace-House-for-sale-by-Kelvin-Chop	Tell Kelvin Chop you saw this ad from DurianProperty to get best deal.DOUBLE STOREY TERRACED HOUSE FOR SALE * Taman Ehsan Jaya @ Jalan Ej 2 * 4 Bedrooms & 5 Bathrooms * Land Area 20 X 70 * Renovated * Leasehold 999 * International Lot * Facing southeast * 24 Hours Security Gated & Guarded * No Co broke For This Unit * Owner listing are welcome. We will help you marketing your property and provide…	2021-10-11	Taman Ehsan Jaya	Johor Bahru	Durian	Terrace House	Taman Ehsan Jaya, Johor Bahru - Terrace House For Sale	na	-1	-1	na	-1	-1	-1	-1	-1	-1	https://cdn.durianproperty.com.my/images/classified_ads/301955911824235.jpg
290000	647	1	Fully Furnished	1	Leasehold	1	na	Ku Azim	https://www.durianproperty.com.my/classified/3010062/3-Elements-Condo-for-sale-by-Ku-Azim	Tell Ku Azim you saw this ad from DurianProperty to get best deal.FOR SALE 3 Elements Condo Seri Kembangan, Selangor +++++++++++++++++++++++ Asking Price RM290k +++++++++++++++++++++++ Property Details: * Leasehold * Bumi * Corner Unit * Level 10 * Built up: 647sqf * Fully Furnished & Full off Glass Windows * 1 Bedroom / 1 Bathrooms * 1 Lot Parking * Facing Pool/Garden * Tenanted Facilities: - Su…	2021-10-11	3 Elements	Bandar Putra Permai	Durian	Condo	3 Elements, Bandar Putra Permai - Condo For Sale	Tenanted	-1	-1	Corner Lot	-1	-1	-1	-1	-1	-1	https://cdn.durianproperty.com.my/images/classified_ads/301006211756540.jpg
458000	1080	2	Partly Furnished	3	Leasehold	2	REN No.: 11307	Fareed Roslee	https://www.durianproperty.com.my/classified/3007995/Alami-Residence-Condo-for-sale-by-Fareed-Roslee	Tell Fareed Roslee you saw this ad from DurianProperty to get best deal.CONTACT: FAREED ROSLEE ( 016-4200248) GS REALTY SDN BHD FOR SALE Alami Residensi Service Apartment, Seksyen 13, Shah Alam PROPERTY DETAILS - Built-Up: 1080 - 3 bedroom & 2 bathroom - 2 unit car park (Side by side) - Kitchen cabinet including hood & hob - Ceiling Fan & L.E.D light FACILITY - Swimming pool - Rooftop sky garden …	2021-10-11	Alami Residence	Shah Alam	Durian	Condo	Alami Residence, Shah Alam - Condo For Sale	na	-1	-1	na	-1	-1	-1	-1	-1	-1	https://cdn.durianproperty.com.my/images/classified_ads/300799511743810.jpeg
3000000	784080	na	na	na	Freehold	na	na	-1	https://www.durianproperty.com.my/classified/2997974/Tanjong-Rambutan-Agriculture-Land-for-sale-by-Kyo-Chua	Tanjung Rambutan Land for Sale in Ipoh ( PRIME ) -18 acres -Agriculture land -999 years ( Freehold ) -Flat and empty land -Beside Kinta River -Suitable for any plantation -Potential to become Residential or Industrial Asking price only RM 3,000,000 Kindly Contact Kyo Chua 012-5106554 or Email at Kyochua@ for arranging viewing purpose. *Welcoming owner drop by your property for Sale or Rent, I wil…	2021-10-11	Tanjong Rambutan	Ipoh	Durian	Agriculture Land	Tanjong Rambutan, Ipoh - Agriculture Land For Sale	Vacant	-1	-1	Intermediate Lot	-1	-1	-1	-1	-1	-1	https://cdn.durianproperty.com.my/images/classified_ads/299797411676520.jpg
477000	869	2	Partly Furnished	2	Freehold	1	na	Felicia	https://www.durianproperty.com.my/classified/3014835/Arte-Condo-for-sale-by-Felicia	Tell Felicia you saw this ad from DurianProperty to get best deal.[New Freehold Condo] in this Golden Hotspot at KL South !! 5 Catalyst Effect - Education, Healthcare, Logistic, Business & Tourism in 1 Location ++++++++++++++++++++++++ Felicia 016-5549572 Felicia 016-5549572 ++++++++++++++++++++++++ BEST for Own Stay & Investment Purpose !!! Top 10 Reasons to Choose Here ::: 1. FREEHOLD 2. Spacio…	2021-10-11	Arte	Shah Alam	Durian	Condo	Arte, Shah Alam - Condo For Sale	na	-1	-1	Intermediate Lot	-1	-1	-1	-1	-1	-1	https://cdn.durianproperty.com.my/images/classified_ads/301483511791817.jpg
170000	748	2	Unfurnished	3	Leasehold	1	na	Steven Yuen	https://www.durianproperty.com.my/classified/3044672/Greenview-Apartments-Apartment-for-sale-by-Steven-Yuen	Tell Steven Yuen you saw this ad from DurianProperty to get best deal.STEVEN 010-521 6896 STEVEN 010-521 6896 STEVEN 010-521 6896 >Well kept >Below market price >High rental return >Near amenities area >Easy access *** This property is arguably one of the best in its range a MUST view *** * Good Property for Own Stay / Investment . * easy access near to town . * Photo is just for a DISPLAY to pro…	2021-10-11	Greenview Apartments	Kepong	Durian	Apartment	Greenview Apartments, Kepong - Apartment For Sale	na	-1	-1	na	-1	-1	-1	-1	-1	-1	https://cdn.durianproperty.com.my/images/classified_ads/304467212001322.jpg
410000	2200	3	Unfurnished	4	Freehold	2	na	Jacklyn Chiaa	https://www.durianproperty.com.my/classified/3035853/Bandar-Sri-Sendayan-Terrace-House-for-sale-by-Jacklyn-Chiaa	You may view Bandar Sri Sendayan Profile here.	2021-10-11	Bandar Sri Sendayan	Seremban	Durian	Terrace House	Bandar Sri Sendayan, Seremban - Terrace House For Sale	na	-1	-1	na	1400	-1	-1	292.857	-1	-1	https://cdn.durianproperty.com.my/images/classified_ads/303585311938345.jpg
300000	1138	2	na	3	Leasehold	1	na	Lucas Teoh	https://www.durianproperty.com.my/classified/3023010/Glenview-Villa-Condo-for-sale-by-Lucas-Teoh	Tell Lucas Teoh you saw this ad from DurianProperty to get best deal.GLENVIEW VILLA FOR SALE -3BEDROOM + 2 BATHROOM -1138SF - 1 covered carpark -STRATA TITLE RELEASED -MID FLOOR -WELL KEPT & MOVE IN CONDITION ***FULL LOAN CAN BE APPLY*** FIRST HOME BUYER GET HIGH DISCOUNT ON LEGAL FEES !!! Full Loan OR CashBack CAN BE ARRANGE !!! Full Loan OR CashBack CAN BE ARRANGE !!! Full Loan OR CashBack CAN …	2021-10-11	Glenview Villa	Cheras	Durian	Condo	Glenview Villa, Cheras - Condo For Sale	na	-1	-1	na	-1	-1	-1	-1	-1	-1	https://cdn.durianproperty.com.my/images/classified_ads/302301011849959.jpg
850000	4177	5+	Unfurnished	6	Freehold	5+	REN No.: 18466	Warda Mustapha	https://www.durianproperty.com.my/classified/3040630/Silk-Residence-Condo-for-sale-by-Warda-Mustapha	Tell Warda Mustapha you saw this ad from DurianProperty to get best deal.Silk Residence Duplex Double Storey Penthouse for sale (freshly painted and ready for viewings) RM850,000 nett - Penthouse High floor Duplex - Build up 4177 sq ft - 6 bedrooms + 7 bathrooms - 3 carpark bays - Freehold - Non-bumi - Strata Title - Only 6 Duplex Penthouse units in whole condo Amenities: Columbia Asia Aeon Mall …	2021-10-11	Silk Residence	Balakong	Durian	Condo	Silk Residence, Balakong - Condo For Sale	Vacant	-1	-1	Corner Lot	-1	-1	-1	-1	-1	-1	https://cdn.durianproperty.com.my/images/classified_ads/304063011970120.jpg
360000	950	2	Fully Furnished	3	Freehold	2	na	Ivan Lim	https://www.durianproperty.com.my/classified/3027202/OUG-Parklane-Serviced-Residence-for-sale-by-IVAN-LIM	Tell IVAN LIM you saw this ad from DurianProperty to get best deal.Oug Parklane FOR SALE FULLY FURNISHED Sale RM 360k Freehold 3 Room 2 bath 950 sqft 2 Parking Lot Sofa TV Rack Dining Table Set Aircond Ceiling Fan Designer Lighting Curtains Kitchen Cabinet Hook & Hood Fridge Washing machine Bed & Mattress Water Heater Kindly Call IVAN 0127125007 For Viewing Kindly Call IVAN 0127125007 For Viewing…	2021-10-11	OUG Parklane	Old Klang Road	Durian	Serviced Residence	OUG Parklane, Old Klang Road - Serviced Residence For Sale	na	-1	-1	na	-1	-1	-1	-1	-1	-1	https://cdn.durianproperty.com.my/images/classified_ads/302720211880562.jpeg
350000	1300	2	na	4	Leasehold	na	REN No.: 43987	Nad Azmi	https://www.durianproperty.com.my/classified/3009590/Section-29-Terrace-House-for-sale-by-nad-azmi	Tell nad azmi you saw this ad from DurianProperty to get best deal.Owner revised harga 365K-350K SINGLE STOREY Taman lombong perak ,Jalan Lombong Besi 29/3B Seksyen 29 ,40460 Shah Alam Asking Price =============== Rm350k =============== =========================== Single Storey Terrace Tittle : leasehold (Malay reserved) House Type: single storey Land area : 1400sqft Num of bedroom: 4 Num of bath…	2021-10-11	Section 29	Shah Alam	Durian	Terrace House	Section 29, Shah Alam - Terrace House For Sale	na	-1	-1	na	1400	-1	-1	250	-1	-1	https://cdn.durianproperty.com.my/images/classified_ads/300959011753585.jpg
288000	834	2	Unfurnished	3	Leasehold	na	REN No.: 01842	Zureeproperties	https://www.durianproperty.com.my/classified/3044039/Seri-Atria-Apartment-Apartment-for-sale-by-Zureeproperties	Tell Zureeproperties you saw this ad from DurianProperty to get best deal.Pangsapuri Seri Atria ,Seksyen U5,Subang Bestari for SALE! Details: - 1st floor - Blok 1 - 3 Bedroom 2 Bathroom - 834 psf - Facility , security, surau, playground, parking AMENITIES: Schools, Masjid, Mini Market, Petronas, Restaurant, Surau, Star Avenue lifestyle shopping Mall, Subang Airport, KFC,McDonald,HELP university, …	2021-10-11	Seri Atria Apartment	Subang Bestari	Durian	Apartment	Seri Atria Apartment, Subang Bestari - Apartment For Sale	na	-1	-1	na	-1	-1	-1	-1	-1	-1	https://cdn.durianproperty.com.my/images/classified_ads/304403911997122.jpg
1902800	3976	5+	Unfurnished	4 + 1	Leasehold	na	na	Gary Lok	https://www.durianproperty.com.my/classified/3010095/Tropicana-Aman-Semi-D-for-sale-by-Gary-Lok	Tell Gary Lok you saw this ad from DurianProperty to get best deal.Tropicana Aman - Dalia Residences Semi Detached For Sale Selling price from RM1.9 mil onwards. Limited units!!! GATED & GUARED The freedom to pursue new experiences and life's passions with absolute peace of mind is here. Tropicana Aman is easily accessible to highways:- Lebuhraya Shah Alam (KESAS) Lebuhraya Kemuning Shah Alam (LK…	2021-10-11	Tropicana Aman	Kota Kemuning	Durian	Semi D	Tropicana Aman, Kota Kemuning - Semi D For Sale	Vacant	-1	-1	Intermediate Lot	3600	-1	-1	528.556	-1	-1	https://cdn.durianproperty.com.my/images/classified_ads/301009511756875.jpg
250000	1400	2	Unfurnished	3	Leasehold	2	REN No.: 22882	Ain Sofea	https://www.durianproperty.com.my/classified/3023709/Taman-Jasper-Jaya-Terrace-House-for-sale-by-AIN-SOFEA	Tell AIN SOFEA you saw this ad from DurianProperty to get best deal.FOR SALE 1 STY TAMAN JASPER JAYA, SEREMBAN NEAR PALM MALL & KPJ Details : - 1 Sty Intermediate - Leasehold - 20 x 70 - 3 Bedrooms - 2 Bathrooms - 1 Store room - Including Grill - Basic Unit Nearby : - 2m to Speedmart/ Family Store - 2m to Surau - 3m to SMK Puteri - 4m to Giatmara Rasah - 8m to bank Access : - 6km to Plus Highway …	2021-10-11	Taman Jasper Jaya	Seremban	Durian	Terrace House	Taman Jasper Jaya, Seremban - Terrace House For Sale	Vacant	-1	-1	Intermediate Lot	1400	-1	-1	178.571	-1	-1	https://cdn.durianproperty.com.my/images/classified_ads/302370911855896.jpg
490000	890	2	Partly Furnished	2	na	1	REN No.: 10907	Ira	https://www.durianproperty.com.my/classified/3022649/Royal-Regent-Condo-for-sale-by-ira	Tell ira you saw this ad from DurianProperty to get best deal.Property Name: Royal Regent Condominium Freehold Sqf: 890 Renovation: kitchen cabinets and air cond Furniture: No Selling price: RM490K Room: 2 Bathroom: 2 Car park: 1 Aircon: yes Water heater: yes Facing : KLCC Status : vacant Ira Mazlyn RVT REALTY O17-35O7248✔️You may view Royal Regent Profile here.	2021-10-11	Royal Regent	Dutamas	Durian	Condo	Royal Regent, Dutamas - Condo For Sale	Vacant	-1	-1	Intermediate Lot	-1	-1	-1	-1	-1	-1	-1
1061800	1318	3	Partly Furnished	3	Freehold	2	na	Mr Jeson Chiew	https://www.durianproperty.com.my/classified/3040548/The-Tropika-Condo-for-sale-by-Mr-Jeson-Chiew	Tell Mr Jeson Chiew you saw this ad from DurianProperty to get best deal.The Tropika is undertaken by Berjaya Golf Resort Bhd, a subsidiary of Berjaya Land, the pioneer developer in Bukit Jalil. This is the developer that’s constructed the area’s famous 18-hole Bukit Jalil Golf and Country Resort decades ago. Now, back to the subject property, The Tropika consists of 868 units of serviced apartme…	2021-10-11	The Tropika	Bukit Jalil	Durian	Condo	The Tropika, Bukit Jalil - Condo For Sale	na	-1	-1	Corner Lot	-1	-1	-1	-1	-1	-1	https://cdn.durianproperty.com.my/images/classified_ads/304054811969515.jpg
359000	1000	2	Unfurnished	3	Freehold	2	na	-1	https://www.durianproperty.com.my/classified/3043011/Saville-Cheras-Condo-for-sale-by-Mavis	Tell Mavis you saw this ad from DurianProperty to get best deal.Bandar Mahkota Cheras Kondo | Near MRT | C180 | Monthly RM1300 -Freehold -Fully Residential Title -1 Block, Super Low Density -3 Rooms 2 Bathrooms -With Big Balcony & Yard -Free 2 Side by Side Car Park -Low Maintenance Fee -Easily access to Cheras Kajang Highway, EKVE Highway, Silk Highway -3-5 mins to Bandar Sungai Long,Cheras Trade…	2021-10-11	Saville @ Cheras	Batu 9 Cheras	Durian	Condo	Saville @ Cheras, Batu 9 Cheras - Condo For Sale	na	-1	-1	na	-1	-1	-1	-1	-1	-1	https://cdn.durianproperty.com.my/images/classified_ads/304301111989968.jpg
956000	3200	5	na	5 + 1	Freehold	na	na	James Tancp	https://www.durianproperty.com.my/classified/3045752/Taming-Mutiara-Semi-D-for-sale-by-James-TanCP	Tell James TanCP you saw this ad from DurianProperty to get best deal.********** 3 STOREY SEMI-D TAMAN TAMING MUTIARA SG LONG ********** ********** 3 STOREY SEMI-D TAMAN TAMING MUTIARA SG LONG ********** ********** 3 STOREY SEMI-D TAMAN TAMING MUTIARA SG LONG ********** 【 DROP : RM 250K 】 【 MARKET VALUE : RM 1.2M 】 =================================== Now Asking : RM 956K =========================…	2021-10-11	Taming Mutiara	Bandar Sungai Long	Durian	Semi D	Taming Mutiara, Bandar Sungai Long - Semi D For Sale	na	-1	-1	na	3400	-1	-1	281.176	-1	-1	https://cdn.durianproperty.com.my/images/classified_ads/304575212008845.jpg
300000	1000	2	Fully Furnished	2	Freehold	2	REN No.: REN14407	Alice Tan	https://www.durianproperty.com.my/classified/3004516/Solaris-Mont-Kiara-Condo-for-sale-by-Alice-Tan	Tell Alice Tan you saw this ad from DurianProperty to get best deal.New Launch‼️ Greenery Forest View KL Freehold & Residential 6KM to KL City Centre ‼️PRICE FROM RM300,000 Only‼️ Easy Access to KL & PJ Low Density Come With 5 Lift 2-4 BEDROOM [731sqft-1220sqft] Monthly Installment from RM1500 Surrounding by MRT,LRT & KTM -1min to Duke Highway -2min walk to Private School -3min to Bank & Office -…	2021-10-11	Solaris Mont Kiara	Mont Kiara	Durian	Condo	Solaris Mont Kiara, Mont Kiara - Condo For Sale	na	-1	-1	Intermediate Lot	-1	-1	-1	-1	-1	-1	https://cdn.durianproperty.com.my/images/classified_ads/300451611717812.jpg
270000	1016	2	Unfurnished	3	Leasehold	na	REN No.: 45046	Mohd Azwan	https://www.durianproperty.com.my/classified/3001144/Taman-Serendah-Makmur-Terrace-House-for-sale-by-Mohd-Azwan	Tell Mohd Azwan you saw this ad from DurianProperty to get best deal.- Address: Jalan Kekwa 13, Taman Serendah Makmur, Serendah - Title Type: Leasehold (Bumi Lot) - Land Size: 990 sqft - Built Up: 1016sqft - Bedrooms: 3, Bathroom: 2 - Renovation: Kitchen Cabinet, Fully Tiles Facilities/Amenities/Accessibility: - KTM Serendah - SRK Serendah, SMK Serendah, SR Agama Serendah - Masjid Nurul Iman Sere…	2021-10-11	Taman Serendah Makmur	Serendah	Durian	Terrace House	Taman Serendah Makmur, Serendah - Terrace House For Sale	Tenanted	-1	-1	Intermediate Lot	990	-1	-1	272.727	-1	-1	https://cdn.durianproperty.com.my/images/classified_ads/300114411695298.jpeg
1550000	2800	na	Unfurnished	na	Freehold	na	REN No.: 34953	Za Rull	https://www.durianproperty.com.my/classified/3021477/KIP-Sentral-Shop-Office-for-sale-by-za-rull	Tell za rull you saw this ad from DurianProperty to get best deal.2 Storey KIP Sentral Kota Warisan Shop For Sale Freehold Non Bumi Lot Size : 22x70 Built Up : 2800 sqft (approx) -Facing KIP SOHO Core -High Occupancy Rate for rental (more than 80%) even during MCO -Very high customers come in during days and night -1st Floor is tenanted -Total rental similar unit around RM4k-5k -Walking Distance …	2021-10-11	KIP Sentral	Kota Warisan	Durian	Shop Office	KIP Sentral, Kota Warisan - Shop Office For Sale	na	-1	-1	na	2800	-1	-1	553.571	-1	-1	https://cdn.durianproperty.com.my/images/classified_ads/302147711837750.jpg
299000	850	2	na	3	Leasehold	1	REN No.: 43987	Nad Azmi	https://www.durianproperty.com.my/classified/3008303/Section-7-Apartment-for-sale-by-nad-azmi	Tell nad azmi you saw this ad from DurianProperty to get best deal.[Near UITM Shah Alam] Baiduri Apartment Seksyen 7 Shah Alam For Sale !! . Level : 6 Type : Apartment with lift. Build-up : 850 Sqft No of Bedroom : 3 No of Bathroom : 2 Additional Info : - Leasehold Bumi Lot, Kitchen Cabinet - 24 Hours Security, Playground, Multipurpose Hall, Surau. . Selling Price : *RM 299,000* . Amenities : - U…	2021-10-11	Section 7	Shah Alam	Durian	Apartment	Section 7, Shah Alam - Apartment For Sale	na	-1	-1	na	-1	-1	-1	-1	-1	-1	https://cdn.durianproperty.com.my/images/classified_ads/300830311746104.jpg
450000	10000	na	na	na	Freehold	na	REN No.: 32419	Max Chong	https://www.durianproperty.com.my/classified/3044319/Johor-Bahru-Commercial-Land-for-sale-by-Max-Chong	Tell Max Chong you saw this ad from DurianProperty to get best deal.Nice Location At Kempas For Sale Good Condition Land >>>>>>>>>><<<<<<<<<< -Address : Jalan Peematang , Kempas 81200 Johor Bahru -Residential Land (zone industry can do Warehouse) -Land Size : 10,000"sf -Freehold : Yes -Non-Bumi Lot -300m from mainroad -Selling Price : RM450K nego *Welcome Owner Listing* For more info & viewing se…	2021-10-11	Johor Bahru	Johor	Durian	Commercial Land	Johor Bahru, Johor - Commercial Land For Sale	Vacant	-1	-1	na	-1	-1	-1	-1	-1	-1	https://cdn.durianproperty.com.my/images/classified_ads/304431911999336.jpeg
329000	1008	2	Unfurnished	3	Freehold	1	REN No.: 24281	Mr Fazz	https://www.durianproperty.com.my/classified/3048249/Indahria-Apartment-Apartment-for-sale-by-Mr-Fazz	Tell Mr Fazz you saw this ad from DurianProperty to get best deal.APARTMENT UNTUK DIJUAL Pangsapuri Indahria, Seksyen 22, Shah Alam Deposit Felxible Boleh buat pengeluaran KWSP Special untuk Pembeli Rumah Pertama ============================ Harga : RM 329,000 (Nego) Call / whatsapp: En Fazz 012 603 3079 ============================ . DETAIL AND FACILITIES * Freehold (Pegangan Kekal) * Size Unit:…	2021-10-11	Indahria Apartment	Shah Alam	Durian	Apartment	Indahria Apartment, Shah Alam - Apartment For Sale	Tenanted	-1	-1	na	-1	-1	-1	-1	-1	-1	https://cdn.durianproperty.com.my/images/classified_ads/304824912024134.jpeg
290000	800	2	Unfurnished	3	Freehold	2	REN No.: REN27555	Habibah	https://www.durianproperty.com.my/classified/3038733/Taman-Sungai-Pinang-Terrace-House-for-sale-by-HABIBAH	Tell HABIBAH you saw this ad from DurianProperty to get best deal.Booking hanya RM 1,000 If loan approved 90% (can use EPF acc 2 (10%)) Single Storey at Kg. Sungai Pinang - Pulau Indah. RM 290,000 Discount : ======== Free MOT (1st house) Free SPA ( Sales & Purchase ) Legal Fee - Loan Bank ( boleh masuk dlm loan) DESCRIPTION ============ - Freehold - Malay Reserved - 3 Bedrooms - 2 Bathrooms - LA …	2021-10-11	Taman Sungai Pinang	Port Klang	Durian	Terrace House	Taman Sungai Pinang, Port Klang - Terrace House For Sale	na	-1	-1	Intermediate Lot	1400	-1	-1	207.143	-1	-1	https://cdn.durianproperty.com.my/images/classified_ads/303873311957851.jpeg
350000	653	2	Unfurnished	3	Freehold	0	na	Marina	https://www.durianproperty.com.my/classified/3042838/Denai-Alam-Apartment-for-sale-by-MARINA	Tell MARINA you saw this ad from DurianProperty to get best deal.FOR SALE!!! *Urban Lifestyle Concept Serviced Apartment With Affordable Price* SALE SALE SALE !!!! * Low Booking Fee RM500, Will Get Your Dream House * Denai Alam FreeHold Starting 350K 450 SQFT - 956 SQFT SOHO / Serviced Apartment Built up 450 sqft 653 sqft 753 sqft 956 sqft *Acessibility * Guthrie highway DASH highway Elite highwa…	2021-10-11	Denai Alam	Shah Alam	Durian	Apartment	Denai Alam, Shah Alam - Apartment For Sale	Vacant	-1	-1	Intermediate Lot	-1	-1	-1	-1	-1	-1	https://cdn.durianproperty.com.my/images/classified_ads/304283811988666.jpg
2300000	6000	5+	Partly Furnished	6	Freehold	2	na	Cl Loh	https://www.durianproperty.com.my/classified/3010451/The-Cove-Condo-for-sale-by-CL-Loh	Tell CL Loh you saw this ad from DurianProperty to get best deal.Location : Tanjung Bungah Type : Condo Tenure : Freehold Built-up : 6000 sq ft Car Park : 2 No. of Bedrooms : 5 + 1 No. of Bathrooms : 6 Condition : Reno and furnished Price : RM2,300,000.00 (View & offer) Call CL Loh (PEA 0660) at 012 - 493 7415 for viewing!! Website : TODAY PROPERTIES (E(3)1080)Please see more of my listings at ht…	2021-10-11	The Cove	Tanjung Bungah	Durian	Condo	The Cove, Tanjung Bungah - Condo For Sale	na	-1	-1	na	-1	-1	-1	-1	-1	-1	https://cdn.durianproperty.com.my/images/classified_ads/301045111758762.JPG
65000	810	2	Unfurnished	3	Freehold	1	na	Ting	https://www.durianproperty.com.my/classified/3045606/Rumah-Pangsa-Pandan-Malim-Apartment-for-sale-by-Ting	Tell Ting you saw this ad from DurianProperty to get best deal.TAMAN PANGSAPURI MALIM Flat info - 3bedroom - 2bathroom - second floor - walkup apartment - freehold Location easy access to - malim industri - town area - pandan malim *Look forward to serve you better *WELCOME APPOINTMENT TO VIEW APPRECIATE *OWNER ARE MOST WELCOME TO LISTING YR Ting (REN23253) 017-3766228 Real Estate Negotiator what…	2021-10-11	Rumah Pangsa Pandan Malim	Melaka	Durian	Apartment	Rumah Pangsa Pandan Malim, Melaka - Apartment For Sale	Vacant	-1	-1	Intermediate Lot	-1	-1	-1	-1	-1	-1	https://cdn.durianproperty.com.my/images/classified_ads/304560612007705.jpeg
990000	2805	4	Partly Furnished	5	Freehold	2	REN No.: 08653	Alex Wong	https://www.durianproperty.com.my/classified/3011376/The-Oasis-Link-Villa-for-sale-by-Alex-Wong	Tell Alex Wong you saw this ad from DurianProperty to get best deal.BEST PRICE 2.5 Storey Link House @ The Oasis Cheras up for SALE! AVAILABLE FOR SALE NOW! (Please contact Alex @ 019-3136211 for viewing appointment) - 2.5 Storey Link House @ 2805 sqft. - Surrounded with peaceful neighbourhood - 5 Bedrooms and 4 Bathrooms! - Kitchen cabinet + ceiling fans + airconds + wardrobes + wall mirror + li…	2021-10-11	The Oasis	Cheras South	Durian	Link Villa	The Oasis, Cheras South - Link Villa For Sale	Vacant	-1	-1	na	2805	-1	-1	352.941	-1	-1	https://cdn.durianproperty.com.my/images/classified_ads/301137611765881.jpeg
230000	280	1	Partly Furnished	1	Leasehold	na	na	Janice Ong	https://www.durianproperty.com.my/classified/3044756/Kuala-Lumpur-SOHO-for-sale-by-Janice-Ong	Tell Janice Ong you saw this ad from DurianProperty to get best deal.Monthly Installment onlyRM800‼ ️You will be able to enjoy the high-class&modern dream houseYou may view Kuala Lumpur Profile here.	2021-10-11	Kuala Lumpur	Malaysia	Durian	SOHO	Kuala Lumpur, Malaysia - SOHO For Sale	na	-1	-1	na	-1	-1	-1	-1	-1	-1	https://cdn.durianproperty.com.my/images/classified_ads/304475612001961.jpg
700000	929	na	Unfurnished	na	na	na	REN No.: 20757	Abby Tan	https://www.durianproperty.com.my/classified/3044772/One-Place-Mall-Shop-Office-for-sale-by-Abby-Tan	Tell Abby Tan you saw this ad from DurianProperty to get best deal.For SELL | One Place Mall | 1st Floor | Adjoining | Putatan | Under Value MYR 700,000.00 *One Place Mall | 1st Floor | Adjoining | Putatan | Under Value* > 1st Floor with facing to Road frontage > Lot 1-29 = 473 sqft > Lot 1-30 = 456 sqft > Total Built-Up is 929 Square feet > Bare Units > Suitable for Office usage or Shop > Previo…	2021-10-11	One Place Mall	Putatan	Durian	Shop Office	One Place Mall, Putatan - Shop Office For Sale	Vacant	-1	-1	Intermediate Lot	-1	-1	-1	-1	-1	-1	https://cdn.durianproperty.com.my/images/classified_ads/304477212002052.jpg
368000	2150	3	Unfurnished	3 + 1	Freehold	2	na	Jessica Chan	https://www.durianproperty.com.my/classified/3026394/Seremban-3-Superlink-for-sale-by-Jessica-Chan	Tell Jessica Chan you saw this ad from DurianProperty to get best deal.Free of all charges, absolutely no hidden charges - Refundable booking fee - No Down payment SELLING POINTS : - Gated and guarded, 24 hours surveillance - Free 2 years maintenance fee, broadband wifi, private clubhouse access - Semi Furnished - Township completed with ALL infrastructures ACCESS ✔Freehold 5 minutes to major hig…	2021-10-11	Seremban 3	Seremban	Durian	Superlink	Seremban 3, Seremban - Superlink For Sale	Vacant	-1	-1	Intermediate Lot	1400	-1	-1	262.857	-1	-1	https://cdn.durianproperty.com.my/images/classified_ads/302639411875338.jpg
9800000	30700	na	na	na	Freehold	na	REN No.: PEA1315	Williamproperty89	https://www.durianproperty.com.my/classified/3014351/Kapar-Terrace-Factory-for-sale-by-Williamproperty89	Tell Williamproperty89 you saw this ad from DurianProperty to get best deal.KLANG FACTORY FOR SALE WITH less than RM45k/MTH NEW 3-YEAR TENANCY:- Location : Lot 48217 ( PT 39792 ) Jalan Sekolah, Off Jalan Rantau Panjang, 42100 Kapar, Klang, Selangor D. E. Land Tenure : Freehold Zoning: Industrial Land Size : 1.24 acres Factory B/U : 29,200 sqft Office B/U : 1,500 sqft Total Built-up : 30,700 sqft …	2021-10-11	Kapar	Klang	Durian	Factory	Kapar, Klang - Terrace Factory For Sale	na	-1	-1	Corner Lot	-1	-1	-1	-1	-1	-1	https://cdn.durianproperty.com.my/images/classified_ads/301435111788017.jpg
588000	1269	2	Unfurnished	3 + 1	Freehold	2	na	-1	https://www.durianproperty.com.my/classified/2994661/Cloudtree-Condo-for-sale-by-TAN-CHUN-LIM	Tell TAN CHUN LIM you saw this ad from DurianProperty to get best deal."High End Condo for FIRE SALE" Penthouse Unit with amazing view and sunset. Ultra clear ceiling height of about 11.5 ft (up to soffit of plaster ceiling) Double Slab roof system (no leak issue) Super balconyYou may view Cloudtree Profile here.	2021-10-11	Cloudtree	Bandar Damai Perdana	Durian	Condo	Cloudtree, Bandar Damai Perdana - Condo For Sale	Vacant	-1	-1	Corner Lot	-1	-1	-1	-1	-1	-1	https://cdn.durianproperty.com.my/images/classified_ads/299466111654375.jpg
8000000	43488	na	na	na	Leasehold	na	REN No.: 02313	Nelson Yap	https://www.durianproperty.com.my/classified/3003009/Taman-Puncak-Jalil-Commercial-Land-for-sale-by-Nelson-Yap	Tell Nelson Yap you saw this ad from DurianProperty to get best deal.1 acre (43,488 sq ft) commercial land for sale. Located at Taman Puncak Jalil facing mainroad Persiaran Puncak Jalil Leasehold title 2103 Land dimension 203.5 ft (62 m) x 213 ft (65 m) Selling RM 8 million Please contact Nelson Yap @ 016 3328637to arrange site viewing Midas Properties E(3)0677Please see more of my listings at ht…	2021-10-11	Taman Puncak Jalil	Seri Kembangan	Durian	Commercial Land	Taman Puncak Jalil, Seri Kembangan - Commercial Land For Sale	Vacant	-1	-1	Intermediate Lot	-1	-1	-1	-1	-1	-1	https://cdn.durianproperty.com.my/images/classified_ads/300300911707588.jpg
360720	872	2	Unfurnished	2	Leasehold	na	na	Wayne Lee	https://www.durianproperty.com.my/classified/3041928/Residensi-Sutera-7-Apartment-for-sale-by-Wayne-Lee	Tell Wayne Lee you saw this ad from DurianProperty to get best deal.FREEHOLD ! HOC Package! * SPECIAL PROMOTION (Contact 012-3895316 to get Good Deal) * FREE SPA Legal Fee * FREE Loan Legal Fee * FREE MOT * FREE 2 Car Park * MRT Access - Shuttle bus available direct to Bukit Dukung MRT Station Type: - Type A – 872 sq ft (2 Rooms & 2 Bath rooms) - Type B – 980 sq ft (3 Rooms & 2 Bath rooms) - Type…	2021-10-11	Residensi Sutera 7	Kajang	Durian	Apartment	Residensi Sutera 7, Kajang - Apartment For Sale	na	-1	-1	na	-1	-1	-1	-1	-1	-1	https://cdn.durianproperty.com.my/images/classified_ads/304192811980656.jpg
430000	1026	2	Unfurnished	3	Leasehold	2	na	Brian	https://www.durianproperty.com.my/classified/3048175/Skyvilla-Condo-for-sale-by-Brian	Tell Brian you saw this ad from DurianProperty to get best deal.NEW UNIT Direct buy with Developer Special Offer Below Market - Booking Fees RM500 - NO down payment - Cash Back RM25,000 - Free All legal fees - Free MOT Property Details : * 1026sf * Leasehold * BUMI UNIT * Basic unit * 3 Bedrooms, 2 Bathroom * 2 Car Park * 3 tier security * With Balcony ===================================== Contac…	2021-10-11	Skyvilla	D'Island	Durian	Condo	Skyvilla, D'Island - Condo For Sale	na	-1	-1	na	-1	-1	-1	-1	-1	-1	https://cdn.durianproperty.com.my/images/classified_ads/304817512023546.jpg
2600000	9564	na	na	na	Freehold	na	REN No.: 02313	Nelson Yap	https://www.durianproperty.com.my/classified/3013701/Taman-Shanghai-Bungalow-Lot-for-sale-by-Nelson-Yap	Tell Nelson Yap you saw this ad from DurianProperty to get best deal.Taman Shanghai off Batu 3 Jalan Klang Lama (Old Klang Road) Corner lot bungalow house for sale RM 2.6 million Land area 9564 sq ft Built up 4700 sq ft Big spacious land area for house extension Old design bungalow suitable for major renovation Please contact Nelson Yap @ 016 3328637 to arrange viewingPlease see more of my listin…	2021-10-11	Taman Shanghai	Old Klang Road	Durian	Bungalow Lot	Taman Shanghai, Old Klang Road - Bungalow Lot For Sale	Tenanted	-1	-1	Corner Lot	-1	-1	-1	-1	-1	-1	https://cdn.durianproperty.com.my/images/classified_ads/301370111783718.jpg
218000	732	2	Partly Furnished	3	Freehold	1	REN No.: 03713	Kelly Lim	https://www.durianproperty.com.my/classified/3016698/Permas-Jaya-Flat-Flat-for-sale-by-Kelly-Lim	Tell Kelly Lim you saw this ad from DurianProperty to get best deal.For Sale Rumah Pangsa Permas Jaya ▪️Flat ▪️Ground Floor ▪️732 sqft ▪️Freehold ▪️Non Bumi ▪️3 Bedroom ▪️2 Bathroom ▪️1Carpark Please see more of my listings at http://xiewxiew.myagent.my/.You may view Permas Jaya Flat Profile here.	2021-10-11	Permas Jaya Flat	Masai	Durian	Flat	Permas Jaya Flat, Masai - Flat For Sale	na	-1	-1	Intermediate Lot	-1	-1	-1	-1	-1	-1	https://cdn.durianproperty.com.my/images/classified_ads/301669811803724.jpeg
925000	2348	4	Partly Furnished	4	Leasehold	3	na	Shaun Chong	https://www.durianproperty.com.my/classified/3043670/Taman-Cheras-Idaman-Terrace-House-for-sale-by-Shaun-Chong	Tell Shaun Chong you saw this ad from DurianProperty to get best deal.Cheras Idaman 2 House For Sale Bandar Sungai Long, Balakong, Kajang Corner Lot Facing Field Call Me, Let's Talk & Negotiate!!! 2 Storey Corner House Sell BELOW Market Kitchen Cabinet c/w hood and hob Land Size 3284 sf Build Up 2384 sf For viewing appointment: Shaun Chong 0163314996 REN 21102 VIVAHOMES REALTY (KL) (E(3)1353/5)Pl…	2021-10-11	Taman Cheras Idaman	Kajang	Durian	Terrace House	Taman Cheras Idaman, Kajang - Terrace House For Sale	Vacant	-1	-1	Corner Lot	3284	-1	-1	281.669	-1	-1	https://cdn.durianproperty.com.my/images/classified_ads/304367011994092.jpg
397000	1002	2	Unfurnished	3	na	na	na	Wingfoo	https://www.durianproperty.com.my/classified/3003637/Tropicana-Aman-Condo-for-sale-by-WingFoo	Tell WingFoo you saw this ad from DurianProperty to get best deal.Kota Kemuning Eco Sanctuary - 2nd Desa Parkcity Lakeside TOWN (HouszKey & HOC Package ) *** Rent, Stay, Buy - 870sf & 1000sf - 3 rooms 2 baths - Zero Downpayment - 100% Loan - Lowest Interest Rate = Collect Key Dec @ World Class Developer *** Free SPA Legal fees, Stamping *** Free Loan Legal Fees, Stamping *** MOT *** Save Progress…	2021-10-11	Tropicana Aman	Kota Kemuning	Durian	Condo	Tropicana Aman, Kota Kemuning - Condo For Sale	na	-1	-1	na	-1	-1	-1	-1	-1	-1	https://cdn.durianproperty.com.my/images/classified_ads/300363711711530.jpg
795000	3142	na	Unfurnished	na	Freehold	na	na	Qareem	https://www.durianproperty.com.my/classified/3019454/Bandar-Utama-Batang-Kali-Shop-Office-for-sale-by-qareem	Tell qareem you saw this ad from DurianProperty to get best deal.2 STOREY SHOP LOT FREEHOLD BATANG KALI FREE SPA DISKAUN 5% Freehold LA 1650 - 1840 sft BU 3142 - 3658 sft Many parking space, commercial area. suitable for Colleage, shops, Wedding Centre and etc. Walk up shoplot Price from RM 795K+ - 1.095M+ after 5% discount. Call me for viewing. Qareem 0133273327Please see more of my listings at …	2021-10-11	Bandar Utama Batang Kali	Selangor	Durian	Shop Office	Bandar Utama Batang Kali, Selangor - Shop Office For Sale	Vacant	-1	-1	Intermediate Lot	1650	-1	-1	481.818	-1	-1	https://cdn.durianproperty.com.my/images/classified_ads/301945411823367.jpg
650000	2454	3	Partly Furnished	4	Freehold	na	REN No.: REN 38180	Hairul Akmal Bin Osman	https://www.durianproperty.com.my/classified/3017490/Taman-Pulai-Hijauan-Cluster-for-sale-by-Hairul-Akmal-Bin-Osman	Tell Hairul Akmal Bin Osman you saw this ad from DurianProperty to get best deal.DOUBLE STOREY CLUSTER HOUSE TAMAN PULAI HIJAUAN,KANGKAR PULAI ============================= - Jalan Palma 5,Taman Pulai Hijauan, Johor - 2-Sty Cluster House - Intermediate Lot - 2454 - 4 Bedrooms & 3 Bathrooms - Bumi Lot - Freehold - Kitchen extended and renovated - Gated and Guarded AMENITIES & ACCESBILITY =========…	2021-10-11	Taman Pulai Hijauan	Kangkar Pulai	Durian	Cluster	Taman Pulai Hijauan, Kangkar Pulai - Cluster For Sale	na	-1	-1	na	-1	-1	-1	-1	-1	-1	https://cdn.durianproperty.com.my/images/classified_ads/301749011808771.jpg
578000	1300	3	Partly Furnished	3	Freehold	2	REN No.: 1307	Jessline	https://www.durianproperty.com.my/classified/3013461/Kuala-Lumpur-Condo-new-launch-by-Jessline	Tell Jessline you saw this ad from DurianProperty to get best deal.Greenery Luxury Condo & 10 Min To Sunway Velocity Jessline 018-4641715 ✅ Super Low density Whole Block 150 uinit ✅ 1200sf - 1800sf (3 rooms - 3 rooms) ✅ Free 2-3 Car park ✅ 3 Tiers Security ⭐ 5 Stars Luxury Resorts Facilities ⭐ Sky Pool Facing 360 degree KLCC View , TRX , PNB 118 ⭐ Next to International School Strategic Location:Y…	2021-10-11	na	na	Durian	Condo	na	na	-1	-1	Corner Lot	-1	-1	-1	-1	-1	-1	https://cdn.durianproperty.com.my/images/classified_ads/301346111782142.png
420000	1650	3	na	4	Freehold	na	REN No.: 37497	Hairul Hafiz Harun	https://www.durianproperty.com.my/classified/3007134/Bandar-Tasik-Kesuma-Terrace-House-for-sale-by-Hairul-Hafiz-Harun	Tell Hairul Hafiz Harun you saw this ad from DurianProperty to get best deal.WTS/WTL: *Exclusive listing * Selling Price: RM420K nego Rental Price: RM1000/month END LOT DOUBLE STOREY TERRACE (FASA9C). BANDAR TASIK KESUMA, SEMENYIH Property good condition & ready to move in DETAILS: ======== -Land area 18 x 70 1650 approximate -Freehold (Bumi Lot) -Individual title -4 bedrooms -3 bathrooms -Facing…	2021-10-11	Bandar Tasik Kesuma	Beranang	Durian	Terrace House	Bandar Tasik Kesuma, Beranang - Terrace House For Sale	Tenanted	-1	-1	End Lot	1260	-1	-1	333.333	-1	-1	https://cdn.durianproperty.com.my/images/classified_ads/300713411737296.jpg
270000	854	2	Unfurnished	3	Freehold	1	na	Muhammad Fuad	https://www.durianproperty.com.my/classified/3011362/Tasik-Heights-Apartment-Apartment-for-sale-by-muhammad-fuad	Tell muhammad fuad you saw this ad from DurianProperty to get best deal.TASIK HEIGHTS APARTMENT BANDAR TASIK SELATAN RM270K Block F (Level 5) with Lift Condition : with Renovation Built Up : 854 sqft Freehold/Non Bumi 3 Bedrooms 2 Bathrooms Asking price: RM 270,000.00 NEARBY AMENITIS - TBS - Bandar Tasik Selatan ERL - Bandar Tasik Selatan LRT - Bandar Tasik Selatan Komuter - SMK Bandar Tasik Sela…	2021-10-11	Tasik Heights Apartment	Bandar Tasik Selatan	Durian	Apartment	Tasik Heights Apartment, Bandar Tasik Selatan - Apartment For Sale	na	-1	-1	na	-1	-1	-1	-1	-1	-1	https://cdn.durianproperty.com.my/images/classified_ads/301136211765790.jpeg
355000	854	2	Partly Furnished	3	Freehold	2	na	Roy Lim	https://www.durianproperty.com.my/classified/3033554/Greenpark-Serdang-Condo-for-sale-by-Roy-Lim	Tell Roy Lim you saw this ad from DurianProperty to get best deal.Serdang Prime location area New condo with full club house facilities Near bus station, school, shop, restaurant, KTM station Renovation with all lighting, all room with fans, water heater, kitchen table top. Call For Best Price 016-2335550 Roy lim GS Realty Sdn Bhd (E(1)1307)You may view Greenpark @ Serdang Profile here.	2021-10-11	Greenpark @ Serdang	Seri Kembangan	Durian	Condo	Greenpark @ Serdang, Seri Kembangan - Condo For Sale	Vacant	-1	-1	Intermediate Lot	-1	-1	-1	-1	-1	-1	https://cdn.durianproperty.com.my/images/classified_ads/303355411923404.jpg
450000	1650	3	Unfurnished	4	Leasehold	2	REN No.: 32639	Jay Azza	https://www.durianproperty.com.my/classified/3004192/Seri-Pristana-Terrace-House-for-sale-by-JaY-AzzA	Tell JaY AzzA you saw this ad from DurianProperty to get best deal.FOR SALE!!! 2-STOREY INTERMEDIATE TERRACE HOUSE @ SERI PRISTANA, SG BULOH PROPERTY DETAILS: ================= You may view Seri Pristana Profile here.	2021-10-11	Seri Pristana	Sungai Buloh	Durian	Terrace House	Seri Pristana, Sungai Buloh - Terrace House For Sale	Tenanted	-1	-1	Intermediate Lot	1300	-1	-1	346.154	-1	-1	https://cdn.durianproperty.com.my/images/classified_ads/300419211715519.jpeg
230000	624	2	na	3	Leasehold	1	na	Mohd Nuruddin Hussin	https://www.durianproperty.com.my/classified/3015394/Cendana-Apartment-Apartment-for-sale-by-Mohd-Nuruddin-Hussin	Tell Mohd Nuruddin Hussin you saw this ad from DurianProperty to get best deal.CENDANA APARTMENT Bandar Sri Permaisuri, Cheras ================================== SELLING PRICE: RM230,000.00 ONLY [ NEGOTIABLE ] ================================== DETAILS: -------------------------------------------------- # Level 3 # Tenure: Leasehold # Built Up Area: 624 sqft # 3 Bedroom, 2 Bathroom # Access Card …	2021-10-11	Cendana Apartment	Bandar Sri Permaisuri	Durian	Apartment	Cendana Apartment, Bandar Sri Permaisuri - Apartment For Sale	na	-1	-1	na	-1	-1	-1	-1	-1	-1	https://cdn.durianproperty.com.my/images/classified_ads/301539411795051.jpeg
320000	829	2	Partly Furnished	3	Leasehold	1	REN No.: 15525	Jimmy Goh	https://www.durianproperty.com.my/classified/2763761/Pandan-Court-Condo-for-sale-by-Jimmy-Goh	Tell Jimmy Goh you saw this ad from DurianProperty to get best deal.Pandan Court Condo, Pandan Mewah @ 828sf @ 3 rooms 2 bathrooms @ 24-hour Security @ Parking Space Near by: - Taman Komersial Pandan Indah - Kampung Baru Ampang - Pandan Cahaya - Pandan Indah - Taman Lembah Maju Amenities: - Ampang Hospital, Smk Pandan Mewah, McDonald - Easy Access to MRR2 Highway SALE: RM 320,000 Bank & Lawyer Ar…	2021-10-11	Pandan Court	Pandan	Durian	Condo	Pandan Court, Pandan - Condo For Sale	Vacant	-1	-1	Intermediate Lot	-1	-1	-1	-1	-1	-1	https://cdn.durianproperty.com.my/images/classified_ads/276376110352024.jpg
4236509	2480	4	na	4 + 3	Freehold	2	na	Maria	https://www.durianproperty.com.my/classified/3031457/Cyber-9-Superlink-for-sale-by-Maria	Tell Maria you saw this ad from DurianProperty to get best deal.❗️❗️❗️❗️FREEHOLD DOUBLE STOREY SUPERLINK FOR SELL❗️❗️❗️❗️ You may view Cyber 9 Profile here.	2021-10-11	Cyber 9	Cyberjaya	Durian	Superlink	Cyber 9, Cyberjaya - Superlink For Sale	Vacant	-1	-1	Intermediate Lot	2375	-1	-1	1783.79	-1	-1	-1
15500000	51000	na	na	na	Leasehold	na	REN No.: 11888	Jim Yong	https://www.durianproperty.com.my/classified/3051238/Taman-Cheras-Jaya-Detached-Factory-for-sale-by-Jim-Yong	Tell Jim Yong you saw this ad from DurianProperty to get best deal.Taman Cheras Jaya, jalan 3a, batu 9, jalan balakong, 1sty detached factory cum 2sty office sale at rm15500000, sale with tenancy with rm50k permonth..You may view Taman Cheras Jaya Profile here.	2021-10-11	Taman Cheras Jaya	Balakong	Durian	Factory	Taman Cheras Jaya, Balakong - Detached Factory For Sale	Tenanted	-1	-1	Intermediate Lot	-1	-1	-1	-1	-1	-1	https://cdn.durianproperty.com.my/images/classified_ads/305123812046071.jpg
2150000	4578	5+	Partly Furnished	7	Freehold	na	na	Rena Rahman	https://www.durianproperty.com.my/classified/3007660/Sri-Carcosa-Bungalow-House-for-sale-by-Rena-Rahman	Tell Rena Rahman you saw this ad from DurianProperty to get best deal.SRI CARCOSA, SEREMBAN 2 RENOVATED DOUBLE STOREY SPLIT LEVEL BUNGALOW Asking price: RM 2,150,000,00 Detail: * Double Storey Bungalow * BU: 4578 sqft approx. * LA: 8129 sqft approx. * 6+2 Bedroom2, 6 Bathrooms * Freehold | Bumi | Renovated * Partly furnished | Intermediate * Greenery view | South East Renovation: * Fully extended…	2021-10-11	Sri Carcosa	Seremban 2	Durian	Bungalow House	Sri Carcosa, Seremban 2 - Bungalow House For Sale	Owner Occupied	-1	-1	Intermediate Lot	8129	-1	-1	264.485	-1	-1	https://cdn.durianproperty.com.my/images/classified_ads/300766011741221.jpg
1200000	2600	4	na	4	Freehold	na	na	-1	https://www.durianproperty.com.my/classified/2997837/Sathu-Terraces-Terrace-House-for-sale-by-Crystal-Khor	Unit is renovated Fully Extended with balcony upstairs and drying area for downstairs New total build up is more than 2600sqft Land Area: 22x75 sqft 4 bedrooms 4 bathrooms can park many cars Nearby neighborhood include Dua Villas, Tree Residency and Setia Pearl Island Near to Solaria Residence and Summerskye with many f&b outlets nearby 3 minits to Penang International Airport Few units available…	2021-10-11	Sathu Terraces	Bayan Lepas	Durian	Terrace House	Sathu Terraces, Bayan Lepas - Terrace House For Sale	na	-1	-1	na	1760	-1	-1	681.818	-1	-1	https://cdn.durianproperty.com.my/images/classified_ads/299783711675556.jpg
599000	910	2	Unfurnished	3	Leasehold	2	na	Roy Lim	https://www.durianproperty.com.my/classified/3023240/Taman-Sungai-Besi-Condo-for-sale-by-Roy-Lim	Tell Roy Lim you saw this ad from DurianProperty to get best deal.***** Prime location in the Heart of KL ***** ***** 5 reason y buy from us / Dont miss it in 2018 ***** 1)Numerous shopping mall within 10min - Klcc, Mid Valley, Sunway Velocity, Pavillion 2) Accessible via 3 Major Highway - KL-Seremban Highways, Maju Expressway (MEX), Besraya Highway 3) Walking distance to schools - SJK (C) Tai Th…	2021-10-11	Taman Sungai Besi	Sungai Besi	Durian	Condo	Taman Sungai Besi, Sungai Besi - Condo For Sale	Vacant	-1	-1	End Lot	-1	-1	-1	-1	-1	-1	https://cdn.durianproperty.com.my/images/classified_ads/302324011851742.jpg
150000	720	2	Unfurnished	3	Leasehold	2	na	Nur Ain Syafinaz	https://www.durianproperty.com.my/classified/3013274/Pinewood-Court-Apartment-for-sale-by-Nur-Ain-Syafinaz	Tell Nur Ain Syafinaz you saw this ad from DurianProperty to get best deal.WTS Pangsapuri Pinewood Court Bandar Tasik Puteri Rawang Details: Medium Cost Apartment Keluasan : 720 sqft Tingkat : 3 Bilik : 3 Bilik air : 2 Renovated (table top, tiles, grill) Leasehold Bumi Lot Nearby Amenities School/University: Sek Kebangsaan / SMK Bandar Tasik Puteri Sek Rendah Agama / SK Tasik Puteri 2 Sekolah Ber…	2021-10-11	Pinewood Court	Bandar Tasik Puteri	Durian	Apartment	Pinewood Court, Bandar Tasik Puteri - Apartment For Sale	Vacant	-1	-1	na	-1	-1	-1	-1	-1	-1	https://cdn.durianproperty.com.my/images/classified_ads/301327411781013.jpg
428000	1161	2	Partly Furnished	3	Freehold	1	na	-1	https://www.durianproperty.com.my/classified/3045224/Pelangi-Heights-Apartment-for-sale-by-Taran	Tell Taran you saw this ad from DurianProperty to get best deal.Pelangi Heights Apartment (Phase 2) - Spacious & Well Kept Unit - Renovated - Kitchen Cabinet - Plaster Ceiling - 8 ft TV Console Cabinet - 3 unit Air Cond - Curtain with Grills (Fullset) - 2 unit Water Heater - 1 Big Wardrobe for Master Bedroom - Balcony - Move in Condition - 24 hrs Security with AccessCard System - Maintenance Fee …	2021-10-11	Pelangi Heights	Klang	Durian	Apartment	Pelangi Heights, Klang - Apartment For Sale	Owner Occupied	-1	-1	Intermediate Lot	-1	-1	-1	-1	-1	-1	https://cdn.durianproperty.com.my/images/classified_ads/304522412005406.jpg
300000	800	2	Unfurnished	3	Freehold	2	REN No.: REN27555	Habibah	https://www.durianproperty.com.my/classified/3045427/Taman-Sungai-Pinang-Terrace-House-for-sale-by-HABIBAH	Tell HABIBAH you saw this ad from DurianProperty to get best deal.Booking hanya RM 1,000 If loan approved 90% (can use EPF acc 2 (10%)) Single Storey at Kg. Sungai Pinang - Pulau Indah. RM 300,000 Discount : ======== Free MOT (1st house) Free SPA ( Sales & Purchase ) Legal Fee - Loan Bank ( boleh masuk dlm loan) DESCRIPTION ============ - Freehold - Malay Reserved - 3 Bedrooms - 2 Bathrooms - LA …	2021-10-11	Taman Sungai Pinang	Port Klang	Durian	Terrace House	Taman Sungai Pinang, Port Klang - Terrace House For Sale	na	-1	-1	Intermediate Lot	1500	-1	-1	200	-1	-1	https://cdn.durianproperty.com.my/images/classified_ads/304542712006126.jpeg
1700000	3300	3	na	4	Freehold	na	na	Rosliza Awi	https://www.durianproperty.com.my/classified/3024260/Lucky-Garden-Terrace-House-for-sale-by-Rosliza-Awi	Tell Rosliza Awi you saw this ad from DurianProperty to get best deal.DOUBLE STOREY LUCKY GARDEN BANGSAR (JALAN TEMPINIS) 4 Bedrooms & 3 Bathrooms Large Living Room & Kitchen Minimal Renovation needed Playground and Recreational Park nearby (500m) Guarded and Secured by Security Force Located close to nearby amenities Distance to following: Bangsar LRT Station - 2km Pantai Hospital 1.3km Bangsar …	2021-10-11	Lucky Garden	Bangsar	Durian	Terrace House	Lucky Garden, Bangsar - Terrace House For Sale	na	-1	-1	na	1946	-1	-1	873.587	-1	-1	https://cdn.durianproperty.com.my/images/classified_ads/302426011859896.jpg
666000	2335	5	Partly Furnished	5	Leasehold	3	REN No.: 16712	Connie Chew	https://www.durianproperty.com.my/classified/2797939/Taman-Putra-Impiana-Condo-for-sale-by-Connie-Chew	Tell Connie Chew you saw this ad from DurianProperty to get best deal.PUCHONGS NEWEST >> LAKEFRONT RESORT LIVING A stunning lakefront condo in Puchong that promises luxurious lifestyle living amidst a resort setting. Selected units are designed to offer unobstructed panoramic views of the lake and beyond, right from its balcony. With so much living space to play with, you can enjoy the creativity…	2021-10-11	Taman Putra Impiana	Puchong	Durian	Condo	Taman Putra Impiana, Puchong - Condo For Sale	Vacant	-1	-1	na	-1	-1	-1	-1	-1	-1	https://cdn.durianproperty.com.my/images/classified_ads/279793911619693.jpg
385000	926	2	Partly Furnished	3	Freehold	3	REN No.: 21649	Allen Ang	https://www.durianproperty.com.my/classified/3048394/Elaeis-2-Condo-for-sale-by-Allen-Ang	Tell Allen Ang you saw this ad from DurianProperty to get best deal.Elaeis 2 Bukit Jelutong Shah Alam Feature: # Freehold # Partly furnished with air-conds, lights, ceiling fans, kitchen cabinet, built in TV cabinet, TV, wardrobe, water heater # Non Bumi Lot # 3 Bedrooms, 2 Bathrooms # Built Up: 926 sqft # Facing housing area # High Floor # Completion: Year 2002 FACILITIES - Tennis Court - Playgr…	2021-10-11	Elaeis 2	Bukit Jelutong	Durian	Condo	Elaeis 2, Bukit Jelutong - Condo For Sale	na	-1	-1	na	-1	-1	-1	-1	-1	-1	https://cdn.durianproperty.com.my/images/classified_ads/304839412025311.jpg
250000	1430	2	Unfurnished	3	Freehold	na	na	-1	https://www.durianproperty.com.my/classified/2997224/Kluang-Terrace-House-for-sale-by-JEROME-LAU	BERITA YANG TERBAIK! PROMOSI KLUANG ! KLUANG ! KLUANG RUMAH BARU HARGA BARU 2XXXK FULL LOAN UNTUK RUMAH PERTAMA FREE BAYARAN PENGUAMAN SPA FREE STAMPING DUTY (RUMAH PERTAMA) KLIK LINK UNTUK HUBUNGI KAMIYou may view Kluang Profile here.	2021-10-11	Kluang	Johor	Durian	Terrace House	Kluang, Johor - Terrace House For Sale	na	-1	-1	na	1430	-1	-1	174.825	-1	-1	https://cdn.durianproperty.com.my/images/classified_ads/299722411671807.jpg
680000	1025	2	Partly Furnished	2	Freehold	na	REN No.: e1286	Michelle Poon	https://www.durianproperty.com.my/classified/3000038/The-Leafz-Condo-for-sale-by-Michelle-Poon	Tell Michelle Poon you saw this ad from DurianProperty to get best deal.PROPERTY DETAILS Name: The Leafz Address: Off Jalan Kuchai Lama, Sungai Besi, Kuala Lumpur Developer: Exsim Development Completion Year: 2015 Type: Serviced Apartment Tenure: Freehold No. of Blocks: 3 No. of Storey: 22 No. of Units: 643 Land Area: 3.3 acres Built-up: 750 - 1,500 sf Maintenance Fee: RM0.44 psf Launch Price: Fr…	2021-10-11	The Leafz	Sungai Besi	Durian	Condo	The Leafz, Sungai Besi - Condo For Sale	Tenanted	-1	-1	Intermediate Lot	-1	-1	-1	-1	-1	-1	https://cdn.durianproperty.com.my/images/classified_ads/300003811688661.jpg
474000	2200	4	na	5 + 1	Leasehold	na	REN No.: 27307	Hairul	https://www.durianproperty.com.my/classified/3017061/Taman-Langat-Murni-Terrace-House-for-sale-by-HAIRUL	Tell HAIRUL you saw this ad from DurianProperty to get best deal.*FACING OPEN | TERES 2.5 STOREY* Taman Langat Murni, Bukit Changgang, Kuala Langat, Selangor ==============================You may view Taman Langat Murni Profile here.	2021-10-11	Taman Langat Murni	Banting	Durian	Terrace House	Taman Langat Murni, Banting - Terrace House For Sale	Owner Occupied	-1	-1	Intermediate Lot	1600	-1	-1	296.25	-1	-1	https://cdn.durianproperty.com.my/images/classified_ads/301706111806144.jpg
2350000	1787	5	Fully Furnished	3 + 1	Freehold	2	na	-1	https://www.durianproperty.com.my/classified/2998066/The-Sentral-Residences-Serviced-Residence-for-sale-by-Zilla-Ahmad	Fully-Furnished with Interior Design Homes: -3+1 bedrooms and 4 bathroom -Nicely Fully Furnished -Perfect View - High Floor -Ready to Move-in immediately Pls contact ZILLA AHMAD @ 012-7901887 for viewing & more details. Property Name : The Sentral Residences Property Type: Serviced Apt Tenure: Freehold No. of Storey : 56-storey Total No. of Units : 752units Low Zone @ Level 3 – 43 : Typical Units…	2021-10-11	The Sentral Residences	KL Sentral	Durian	Serviced Residence	The Sentral Residences, KL Sentral - Serviced Residence For Sale	na	-1	-1	na	-1	-1	-1	-1	-1	-1	https://cdn.durianproperty.com.my/images/classified_ads/299806611677295.jpg
248000	900	2	Partly Furnished	3	Leasehold	1	na	Jimmy	https://www.durianproperty.com.my/classified/3031728/Bayu-Puteri-2-Apartment-for-sale-by-jimmy	You may view Bayu Puteri 2 Profile here.	2021-10-11	Bayu Puteri 2	Johor Bahru	Durian	Apartment	Bayu Puteri 2, Johor Bahru - Apartment For Sale	Vacant	-1	-1	Intermediate Lot	-1	-1	-1	-1	-1	-1	https://cdn.durianproperty.com.my/images/classified_ads/303172811911034.jpg
178000	750	2	Partly Furnished	3	Leasehold	na	na	Janice Tan	https://www.durianproperty.com.my/classified/3007629/Selayang-Heights-Apartment-for-sale-by-janice-tan	Tell janice tan you saw this ad from DurianProperty to get best deal.Apartment Jelutong Selayang Heights Partially Furnished for Sale @ RM178K Jalan Sh 1/2 Off Jalan Ipoh, Selayang Heights, Selayang, Gombak, 68100 Batu Caves Selangor PROPERTY DETAILS : - Size: 750sqft - with lift - 3 bedrooms 2 bathrooms - Lease Hold - Medium Cost Apartment - Strata Ready - With Parking - Located at convenient an…	2021-10-11	Selayang Heights	Selayang	Durian	Apartment	Selayang Heights, Selayang - Apartment For Sale	Vacant	-1	-1	na	-1	-1	-1	-1	-1	-1	https://cdn.durianproperty.com.my/images/classified_ads/300762911741032.jpg
1543800	1703	3	Partly Furnished	3 + 1	Freehold	2	na	Mr Jeson Chiew	https://www.durianproperty.com.my/classified/3040830/Allevia-Mont-Kiara-Condo-new-launch-by-Mr-Jeson-Chiew	Tell Mr Jeson Chiew you saw this ad from DurianProperty to get best deal.Allevia is a product from UEM Sunrise Berhad. It’s a high-rise condominium in Mont’Kiara, and it was launched in October 2020. Allevia originates from the word ‘alleviate’. It means ‘to make something easier and to relieve a burden’. Thus, the development is designed to evoke calmness. Residents will enjoy the luxury of a hi…	2021-10-11	na	na	Durian	Condo	na	na	-1	-1	na	-1	-1	-1	-1	-1	-1	https://cdn.durianproperty.com.my/images/classified_ads/304083011971722.jpg
480000	1535	3	Fully Furnished	4	Freehold	2	REN No.: 46044	Farzana Adibah	https://www.durianproperty.com.my/classified/3022646/Taman-Pelangi-Semenyih-Terrace-House-for-sale-by-farzana-adibah	Tell farzana adibah you saw this ad from DurianProperty to get best deal.FOR SALE : Renovated End Lot Double Storey Taman Pelangi, Semenyih Details : ================ - Freehold - Land Area : 20 x 75 - Built up : 1535 - 4 bedrooms and 3 bathrooms Renovations (Cost RM100K) : ================ - Plastered Ceiling - Porch full tiles - Autogate System - Master bedroom & bathroom - Extended Kitchen Are…	2021-10-11	Taman Pelangi Semenyih	Semenyih	Durian	Terrace House	Taman Pelangi Semenyih, Semenyih - Terrace House For Sale	na	-1	-1	na	1500	-1	-1	320	-1	-1	https://cdn.durianproperty.com.my/images/classified_ads/302264611847056.jpg
899000	2333	3	Partly Furnished	3 + 1	Leasehold	2	REN No.: PEA1332	George Loh	https://www.durianproperty.com.my/classified/2854694/Perdana-Emerald-Condo-Duplex-for-sale-by-GEORGE-LOH	Tell GEORGE LOH you saw this ad from DurianProperty to get best deal.Good Positioning unit with renovation done. If you want to know more or set appointment to view this duplex condo, please feel free to contact agent, GEORGE LOH at Tel. or WhatsApp: 016-2823823 Other property owners are also welcome to contact me if you want to use our marketing services to promote or list your properties on the…	2021-10-11	Perdana Emerald	Damansara Perdana	Durian	Condo	Perdana Emerald, Damansara Perdana - Condo Duplex For Sale	na	-1	-1	Corner Lot	-1	-1	-1	-1	-1	-1	https://cdn.durianproperty.com.my/images/classified_ads/285469410822798.jpg
450000	757	2	Partly Furnished	3	Leasehold	na	na	Mr Jeson Chiew	https://www.durianproperty.com.my/classified/3050983/Meta-City-Condo-new-launch-by-Mr-Jeson-Chiew	Tell Mr Jeson Chiew you saw this ad from DurianProperty to get best deal.Meta city is a mixed development complemented with service iconic corporate tower, a vibrant lifestyle mall, and international hotel. It is designed to create vibrant lifestyle with urban living choices that go beyond the norm. Walk to cinema, food court, atm, groceries by walk out from your unit, take a elevator to lvl 4, w…	2021-10-11	na	na	Durian	Condo	na	na	-1	-1	na	-1	-1	-1	-1	-1	-1	https://cdn.durianproperty.com.my/images/classified_ads/305098312044308.jpg
250000	638	1	Unfurnished	3	Freehold	na	REN No.: 14227	Amanda Wong	https://www.durianproperty.com.my/classified/3020362/Shangrila-Apartment-Apartment-for-sale-by-Amanda-Wong	Tell Amanda Wong you saw this ad from DurianProperty to get best deal.SHANGRILA Apartment, Sri cheras flat 3rd Floor ,3r1b. 638sfq Well renovated inside. Freehold. Accessibility: -Mrr2 -Silk Highway -LEKAS Highway -PLUS Highway -SUKE Highway HURRY UP whatsapp Now for Amanda Wong 013-8627658Please see more of my listings at http://amandawong.myagent.my/.You may view Shangrila Apartment Profile her…	2021-10-11	Shangrila Apartment	Taman Seri Cheras	Durian	Apartment	Shangrila Apartment, Taman Seri Cheras - Apartment For Sale	na	-1	-1	na	-1	-1	-1	-1	-1	-1	https://cdn.durianproperty.com.my/images/classified_ads/302036211830612.jpg
320000	1302	2	Partly Furnished	3	Freehold	2	REN No.: 23736	Kk Sah	https://www.durianproperty.com.my/classified/2916103/Desa-Semenyih-Terrace-House-for-sale-by-KK-Sah	Tell KK Sah you saw this ad from DurianProperty to get best deal.1 Storey @ Taman Desa Semenyih, Semenyih ** 100% LOAN ** ** RENOVATED ** FREEHOLD 20 x 65 3 Beds 2 Bath Non Bumi Lot Good Condition Renovation : Kitchen Fully Extended Kitchen Table Top with Cabinet Plaster Ceiling Car Porch Full Awning >>For More Details & Viewing, Please Call KK SAH 016-637 5097 (REN 23736) Mobile app : Wechat,Wha…	2021-10-11	Desa Semenyih	Semenyih	Durian	Terrace House	Desa Semenyih, Semenyih - Terrace House For Sale	Vacant	-1	North	Intermediate Lot	1300	-1	-1	246.154	-1	-1	https://cdn.durianproperty.com.my/images/classified_ads/291610311614010.jpg
930000	1646	3	Unfurnished	4 + 1	Freehold	2	REN No.: 47806	Syafarizal	https://www.durianproperty.com.my/classified/3034338/Saville-The-Park-Bangsar-Condo-for-sale-by-Syafarizal	Tell Syafarizal you saw this ad from DurianProperty to get best deal.Saville @ Park Bangsar Condominium Bangsar South / Kerinchi Tenure: Freehold Middle Floor Build Up: 1646sqft Rooms: 4+1 Bath: 3 2 Car Park: side by side Pool View ASKING PRICE RM930k NEGOTIABLE CALL RIZAL FOR VIEWING APPOINTMENT Tel: 0186603616 REN47806 Esprit Estate Agent Sdn Bhd Email: syafarizal@You may view Saville @ The Par…	2021-10-11	Saville @ The Park Bangsar	Pantai	Durian	Condo	Saville @ The Park Bangsar, Pantai - Condo For Sale	na	-1	-1	na	-1	-1	-1	-1	-1	-1	https://cdn.durianproperty.com.my/images/classified_ads/303433811928458.jpeg
680000	2000	3	Unfurnished	4	Leasehold	na	REN No.: 40097	Jasonong	https://www.durianproperty.com.my/classified/3050029/Taman-Serdang-Jaya-Terrace-House-for-sale-by-JasonOng	Tell JasonOng you saw this ad from DurianProperty to get best deal.House for Sell :- Location: Taman Putra Indah, Serdang Jaya Room: 4 Bath: 3 Asking: Rm680,000.00 Please contact for more info J.O 012-5800138 J.O 012-5800138You may view Taman Serdang Jaya Profile here.	2021-10-11	Taman Serdang Jaya	Seri Kembangan	Durian	Terrace House	Taman Serdang Jaya, Seri Kembangan - Terrace House For Sale	na	-1	-1	Intermediate Lot	-1	-1	-1	-1	-1	-1	https://cdn.durianproperty.com.my/images/classified_ads/305002912036369.jpeg
235000	1000	2	Unfurnished	3	Freehold	2	na	Faiz Mat Zaid	https://www.durianproperty.com.my/classified/3040131/Bandar-Baru-Salak-Tinggi-Apartment-for-sale-by-Faiz-Mat-Zaid	Tell Faiz Mat Zaid you saw this ad from DurianProperty to get best deal.WTS / House For Sale : Salak Tinggi / Sepang (Project) . Deposit 1K only!!! New Apartment near Salak Tinggi Sepang For Sale!!!! Type : Apartment With Lift. Estimate Completion : Q4 2022. Deposit : RM 1,000 (Bank Loan) / RM 500 (LPPSA). Tenure : Leasehold (Malay Reserved) Build-up : 1,000 Sqft Total Floor : 14. No of Bedroom :…	2021-10-11	Bandar Baru Salak Tinggi	Sepang	Durian	Apartment	Bandar Baru Salak Tinggi, Sepang - Apartment For Sale	Vacant	-1	-1	Corner Lot	-1	-1	-1	-1	-1	-1	https://cdn.durianproperty.com.my/images/classified_ads/304013111966671.jpg
260000	527	1	Partly Furnished	2	Leasehold	1	na	Marina	https://www.durianproperty.com.my/classified/3029896/Seksyen-1-Wangsa-Maju-Flat-Apartment-for-sale-by-MARINA	Tell MARINA you saw this ad from DurianProperty to get best deal.FOR SALE!!! WALK UP FLAT, SEKSYEN 1, WANGSA MAJU, KUALA LUMPUR Property details : - Level 3 | Walk-up - Built Up : 527sqft - 2 Bedrooms | 1 Bathroom - Leasehold | Non Bumi Lot - Renovated (table top, fully tiles) Accessibilities : - walking distance to LRT Wangsa Maju - easy access from MRR2, Jalan Genting Klang, Duke - 5-10 minutes…	2021-10-11	Seksyen 1 Wangsa Maju Flat	Section 1	Durian	Apartment	Seksyen 1 Wangsa Maju Flat, Section 1 - Apartment For Sale	Tenanted	-1	-1	Intermediate Lot	-1	-1	-1	-1	-1	-1	https://cdn.durianproperty.com.my/images/classified_ads/302989611899271.jpeg
198000	636	1	Unfurnished	1	Leasehold	1	REN No.: 27781	Paul	https://www.durianproperty.com.my/classified/3005962/Vista-Impiana-Apartment-for-sale-by-Paul	Tell Paul you saw this ad from DurianProperty to get best deal.Description Vista Impiana Ground Floor For Sell Vista Impiana Apartment, Taman Bukit Serdang, Seri Kembangan VISTA IMPIANA APARTMENT ( For Sale) - Seri Kembangan Details :- • Type: Apartment • Tenure: Leasehold / non bumi • Built up : 636 sqft (16sq meter +43 sq meter) • 1 Bedrooms • 1 Bathrooms Facilities:- • Swimming Pool • Access C…	2021-10-11	Vista Impiana	Taman Bukit Serdang	Durian	Apartment	Vista Impiana, Taman Bukit Serdang - Apartment For Sale	Tenanted	-1	-1	na	-1	-1	-1	-1	-1	-1	https://cdn.durianproperty.com.my/images/classified_ads/300596211728651.jpg
700000	1800	4	Unfurnished	4	Freehold	4	REN No.: 47231	Hani Aziz	https://www.durianproperty.com.my/classified/3047990/Bandar-Seri-Coalfields-Terrace-House-for-sale-by-Hani-Aziz	Tell Hani Aziz you saw this ad from DurianProperty to get best deal.2 STOREY CORNER LOT , BANDAR SERI COALFILEDS @ SUNGAI BULOH 2 Storey CORNER Seri Coalfields Sg. Buloh NOT FACING OTHER HOUSE & WALKING DISTANCE to PLAYGROUND & MINI GARDEN ASKING PRICE : RM700 000 PROPERTY DETAILS : * Location : Seri Coalfields Sungai Buloh * FREEHOLD * NON BUMILOT * Bedrooms: 4 * Bathroom: 4 * Built up : 24 X 75…	2021-10-11	Bandar Seri Coalfields	Sungai Buloh	Durian	Terrace House	Bandar Seri Coalfields, Sungai Buloh - Terrace House For Sale	Vacant	-1	-1	Corner Lot	3476	-1	-1	201.381	-1	-1	https://cdn.durianproperty.com.my/images/classified_ads/304799012022041.jpg
398888	2500	3	na	4	Freehold	2	na	-1	https://www.durianproperty.com.my/classified/3028511/Taman-Cheras-Terrace-House-for-sale-by-jesstan	Tell jesstan you saw this ad from DurianProperty to get best deal.Big Landed House 0%Downpayment 24 hours Gated Guarded Free Swimming Pool , GymRoom... Sales Package- - SPA Legal Fees - SPA Stamp Duty Fees - Loan Legal Fees - Loan Stamp Duty Fees - MOT & MOFYou may view Taman Cheras Profile here.	2021-10-11	Taman Cheras	Cheras	Durian	Terrace House	Taman Cheras, Cheras - Terrace House For Sale	na	-1	-1	Intermediate Lot	1650	-1	-1	241.75	-1	-1	https://cdn.durianproperty.com.my/images/classified_ads/302851111889684.jpg
95000	10248	na	na	na	Freehold	na	na	Mohamad Shafiq Bin Mahbob	https://www.durianproperty.com.my/classified/2999691/Nyalas-Commercial-Land-for-sale-by-Mohamad-Shafiq-Bin-Mahbob	Tell Mohamad Shafiq Bin Mahbob you saw this ad from DurianProperty to get best deal.TANAH LOT UTK DIJUAL DI MERIANG, MUKIM NYALAS, MELAKAYou may view Nyalas Profile here.	2021-10-11	Nyalas	Melaka	Durian	Commercial Land	Nyalas, Melaka - Commercial Land For Sale	Vacant	-1	-1	Intermediate Lot	-1	-1	-1	-1	-1	-1	https://cdn.durianproperty.com.my/images/classified_ads/299969111686430.jpeg
877900	2990	4	Unfurnished	4 + 1	Freehold	4	REN No.: 21311	Draven	https://www.durianproperty.com.my/classified/3050118/City-Park-Seremban-2-Semi-D-for-sale-by-Draven	Tell Draven you saw this ad from DurianProperty to get best deal.Double Storey Semi Detached House For Sale: LAST 3 UNIT !!! PROPERTY DETAILS: ================= - Freehold - Non Bumi Lot / Bumi Lot - Built up : 2900 - 3000 sqft - Land Area : 38*85 - 40*80 sqft - 4 Bedrooms - 4 Bathrooms - 1 Store Room - Facing empty land FACILITIES: ========== - 24 Hour Security - Playground - Balcony/Patio - Jog…	2021-10-11	City Park Seremban 2	Seremban	Durian	Semi D	City Park Seremban 2, Seremban - Semi D For Sale	na	-1	-1	na	-1	-1	-1	-1	-1	-1	https://cdn.durianproperty.com.my/images/classified_ads/305011812037155.jpg
415000	1549	3	Partly Furnished	4	Freehold	na	na	Mufirasbullah	https://www.durianproperty.com.my/classified/3040136/Taman-Desa-Indah-Terrace-House-for-sale-by-mufirasbullah	Tell mufirasbullah you saw this ad from DurianProperty to get best deal.HOT AREA!!! 2-STOREY TERRACE Taman Desa Indah Nilai Property Detail: - FREEHOLD - NON BUMI Lot - Intermediate - 4 Bedrooms , 3 Bedrooms + 1 small store room - Built Up : 1,549 sqft - Land Area : 22 x 75 sqft - Dry Kitchen and Wet Kitchen ready with cabinet - 4 units of Aircond - 2 units of water heater Accessibility & Nearby …	2021-10-11	Taman Desa Indah	Nilai	Durian	Terrace House	Taman Desa Indah, Nilai - Terrace House For Sale	na	-1	-1	na	1650	-1	-1	251.515	-1	-1	https://cdn.durianproperty.com.my/images/classified_ads/304013611966714.jpeg
1680000	3062	4	Fully Furnished	5	Freehold	4	REN No.: 03289	Andy Lee	https://www.durianproperty.com.my/classified/3018503/Setia-Greens-Terrace-House-for-sale-by-Andy-Lee	Tell Andy Lee you saw this ad from DurianProperty to get best deal.DISCLAIMER: This is a REAL ADVERTISEMENT and you DESERVE THE REAL INFORMATION. I DON'T advertise fake listing / price / fake pictures to solicit client. Thank you. 3 Storey Terrace Corner/Extra land with Renovated Location: Sungai Ara Sqft of built up: Land area(for landed houses): 20 X 65 + Extra land 16 X 65 Number of: 5 bedroom…	2021-10-11	Setia Greens	Sungai Ara	Durian	Terrace House	Setia Greens, Sungai Ara - Terrace House For Sale	Vacant	-1	-1	Intermediate Lot	2340	-1	-1	717.949	-1	-1	https://cdn.durianproperty.com.my/images/classified_ads/301850311816116.jpeg
360000	1700	2	Partly Furnished	4	Freehold	na	REN No.: REN38855	Zul Azrien	https://www.durianproperty.com.my/classified/3005075/Taman-Sungai-Jelok-Condo-for-sale-by-zul-azrien	Tell zul azrien you saw this ad from DurianProperty to get best deal.BIG SIZE 1700sqft Sri Sentosa Condominium, Sungai Jelok, Kajang :heart: Biggest unit 1,700 sqft! :heart: Special developer units, only 10 units :heart: Low Density condo 168 units only :heart: Low level, fully reno ========================= Asking price: RM 360,000 Contact : zul azrien ========================= Details:- =======…	2021-10-11	Taman Sungai Jelok	Kajang	Durian	Condo	Taman Sungai Jelok, Kajang - Condo For Sale	na	-1	-1	na	-1	-1	-1	-1	-1	-1	https://cdn.durianproperty.com.my/images/classified_ads/300507511722035.jpg
850000	1182	2	Unfurnished	3	Leasehold	na	na	Golden Chua	https://www.durianproperty.com.my/classified/3001965/Crest-Residence-Serviced-Residence-for-sale-by-Golden-Chua	Tell Golden Chua you saw this ad from DurianProperty to get best deal.#Crest Luxury Residences #KLCC For #Sale #KLCC #KLTOWER #KUALALUMPUR #QUILLMALL #BUKITBINTANG #PAVILION #GOLDENTRIANGLE #SURIAKLCC #GOODINVESTMENT #FREESPA #PLATINUMSUITES #THEFACESUITES #LRT #MONORAIL #FREELOANAGREEMENT #FREEHOLD #GRR For More Infomation Please Call Golden Chua 0179169218 (Whatsapp / SMS / Call) 01116110886 (W…	2021-10-11	Crest Residence	Kampung Baru	Durian	Serviced Residence	Crest Residence, Kampung Baru - Serviced Residence For Sale	Tenanted	-1	-1	Intermediate Lot	-1	-1	-1	-1	-1	-1	https://cdn.durianproperty.com.my/images/classified_ads/300196511700946.jpg
495000	1800	3	Partly Furnished	4	Freehold	na	REN No.: 02155	Vasumadhi K Muniyandy	https://www.durianproperty.com.my/classified/3034307/Taman-Sejati-Terrace-House-for-sale-by-Vasumadhi-K-Muniyandy	Tell Vasumadhi K Muniyandy you saw this ad from DurianProperty to get best deal.2Sty Partly Renovated House for Sale @ Taman Sejati Klang Own a Property Now!! ============================================= Selling price: RM495K (view to offer) ============================================= Property Details Free hold property Well maintained house Partly Renovated Land Size: 20 X 70 Build up: 1800 s…	2021-10-11	Taman Sejati	Klang	Durian	Terrace House	Taman Sejati, Klang - Terrace House For Sale	Tenanted	-1	-1	Intermediate Lot	1400	-1	-1	353.571	-1	-1	https://cdn.durianproperty.com.my/images/classified_ads/303430711928238.png
1150000	1442	2	Fully Furnished	3	Freehold	2	REN No.: 43976	Andy Ng	https://www.durianproperty.com.my/classified/3050872/The-Veo-Condo-for-sale-by-Andy-Ng	Tell Andy Ng you saw this ad from DurianProperty to get best deal.The Veo, Taman Melawati, Setapak The Veo Condo Nice Unit Block A Facilities: Barbeque Area Covered car park Function room Gymnasium room Landscaped Garden Pool Deck Playground 24 hours security Sky Lounge Surau (Male & Female) Swimming pool & Wading pool Amenities: Near LRT Gombak Melawati Mall Melati Business Centre The Quartza Se…	2021-10-11	The Veo	Melawati	Durian	Condo	The Veo, Melawati - Condo For Sale	Vacant	-1	-1	na	-1	-1	-1	-1	-1	-1	https://cdn.durianproperty.com.my/images/classified_ads/305087212043410.jpeg
613000	1700	3	Unfurnished	4	Leasehold	2	REN No.: 27765	Ernest Chuan	https://www.durianproperty.com.my/classified/3040431/M-Aruna-Terrace-House-for-sale-by-Ernest-Chuan	Tell Ernest Chuan you saw this ad from DurianProperty to get best deal.M-Aruna Carya Rawang New Double Storey Terrace House for Sale Site location: Saujana Rawang (Next to Bandar Country Homes) Highlights Freehold individual title Guarded community Central park within community 5km to AEON Rawang Your Home 2-storey terrace house End lot Size 20 x 75 ft Extra 7ft - 10ft side land Build-up 1,700 sf…	2021-10-11	M Aruna	Rawang	Durian	Terrace House	M Aruna, Rawang - Terrace House For Sale	na	-1	-1	na	1500	-1	-1	408.667	-1	-1	https://cdn.durianproperty.com.my/images/classified_ads/304043111968716.png
675000	1025	2	Fully Furnished	2	Freehold	na	REN No.: e1286	Michelle Poon	https://www.durianproperty.com.my/classified/3007504/The-Leafz-Condo-for-sale-by-Michelle-Poon	Tell Michelle Poon you saw this ad from DurianProperty to get best deal.PROPERTY DETAILS Name: The Leafz Address: Off Jalan Kuchai Lama, Sungai Besi, Kuala Lumpur Developer: Exsim Development Completion Year: 2015 Type: Serviced Apartment Tenure: Freehold No. of Blocks: 3 No. of Storey: 22 No. of Units: 643 Land Area: 3.3 acres Built-up: 750 - 1,500 sf Maintenance Fee: RM0.44 psf Launch Price: Fr…	2021-10-11	The Leafz	Sungai Besi	Durian	Condo	The Leafz, Sungai Besi - Condo For Sale	Tenanted	-1	-1	Intermediate Lot	-1	-1	-1	-1	-1	-1	https://cdn.durianproperty.com.my/images/classified_ads/300750411739807.jpg
530000	1900	3	Unfurnished	4	Freehold	na	REN No.: 02155	Vasumadhi K Muniyandy	https://www.durianproperty.com.my/classified/3050689/Taman-Salak-Sejati-Terrace-House-for-sale-by-Vasumadhi-K-Muniyandy	Tell Vasumadhi K Muniyandy you saw this ad from DurianProperty to get best deal.2Sty Partly Renovated House for Sale @ Taman Sejati Klang Own a Property Now!! ============================================= Selling price: RM530K (view to offer) ============================================= Property Details… Free hold property Well maintained house Partly Renovated Land Size: 20 X 70 Build up: 1900 …	2021-10-11	Taman Salak Sejati	Sepang	Durian	Terrace House	Taman Salak Sejati, Sepang - Terrace House For Sale	Tenanted	-1	-1	Intermediate Lot	1400	-1	-1	378.571	-1	-1	https://cdn.durianproperty.com.my/images/classified_ads/305068912042339.png
1100000	2500	4	Partly Furnished	4	Leasehold	2	REN No.: 21203	Anne Annuar	https://www.durianproperty.com.my/classified/3047555/Section-7-Terrace-House-for-sale-by-Anne-Annuar	Tell Anne Annuar you saw this ad from DurianProperty to get best deal.DOUBLE STOREY ENDLOT SEKSYEN 7 SHAH ALAM DESCRIPTION Type: Double Storey Link House Tenure: Leasehold, Non bumi lot Land Area: 35x70 sqft Built Up: 2,500 sqft Rooms: 4 Baths: 4 Position: Endlot Furnishings: Partly furnished EXTRA FEATURES Full renovated and extended Separated wet and dry kitchen Build in kitchen cabinet Walk in…	2021-10-11	Section 7	Shah Alam	Durian	Terrace House	Section 7, Shah Alam - Terrace House For Sale	na	-1	-1	na	2450	-1	-1	448.98	-1	-1	https://cdn.durianproperty.com.my/images/classified_ads/304755512018807.png
385000	900	2	Fully Furnished	3	Freehold	1	na	-1	https://www.durianproperty.com.my/classified/3016837/Puteri-Indah-Apartment-for-sale-by-Tan-Boon-Haw	Tell Tan Boon Haw you saw this ad from DurianProperty to get best deal.- 3 Bedrooms & 2 Bathrooms - 1 Car Park - Fully Renovated, Balcony Extended & Furnished - FreeholdYou may view Puteri Indah Profile here.	2021-10-11	Puteri Indah	Bayan Baru	Durian	Apartment	Puteri Indah, Bayan Baru - Apartment For Sale	na	-1	-1	na	-1	-1	-1	-1	-1	-1	https://cdn.durianproperty.com.my/images/classified_ads/301683711804121.jpg
799000	2246	3	Unfurnished	2	Leasehold	2	REN No.: 03841	Marziana Bt Najib	https://www.durianproperty.com.my/classified/3017918/Hillpark-Terrace-House-for-sale-by-marziana-bt-najib	Tell marziana bt najib you saw this ad from DurianProperty to get best deal.For Sale 2 Storey Super Link Ceri 2 End Lot With Extra Land 26x80 Bandar Hillpark Puncak Alam Property details: - End lot unit with extra land 26'x80' - Not Facing other house - Leasehold/ Bumi lot - Land saiz : 50x80 - Build up area : 2246 sqft - 5 rooms + 4 bathrooms +1 store - Bedroom no 4 attached to courtyard garden …	2021-10-11	Hillpark	Sungai Buloh	Durian	Terrace House	Hillpark, Sungai Buloh - Terrace House For Sale	na	-1	-1	na	4000	-1	-1	199.75	-1	-1	https://cdn.durianproperty.com.my/images/classified_ads/301791811811623.jpg
409000	1000	2	Partly Furnished	3	Freehold	1	REN No.: 06175	Wayne Chai	https://www.durianproperty.com.my/classified/3047798/Legasi-2-Apartment-for-sale-by-Wayne-Chai	Tell Wayne Chai you saw this ad from DurianProperty to get best deal.Apartment Legasi 2 Taman Desa Melawati, KL * Walk up Apartment * 1,000sf * 3rooms 2baths * Semi Furnish * Freehold * Mid Floor * 1 parking covered * Low Density * Gated & Guarded Semi Furnish as follows : 1) aircond x3 (1.5H x 1, 1.0x2h) 2) fridge 3) 3 seater L shape sofa 4) dining table 5) build in cooker and hood Rinnai 6) dee…	2021-10-11	Legasi 2	Melawati	Durian	Apartment	Legasi 2, Melawati - Apartment For Sale	na	-1	-1	na	-1	-1	-1	-1	-1	-1	https://cdn.durianproperty.com.my/images/classified_ads/304779812048670.jpeg
340000	1076	3	Unfurnished	3	Freehold	1	na	Muhammad Arief	https://www.durianproperty.com.my/classified/3026679/Taman-Bukit-Dahlia-Terrace-House-for-sale-by-Muhammad-Arief	Tell Muhammad Arief you saw this ad from DurianProperty to get best deal.DOUBLE STOREY TERRACE HOUSE, Jalan Sekuntum 20, Taman Bukit Dahlia, 81700 Pasir Gudang, Johor. . PROPERTY DETAILS Freehold 3 bedrooms + 3 bathrooms Land area 100 sg m International Lot . AMENITIES Near to MASLEE PASIR GUDANG Near to BANKS Near to School (SK AND SMK) Near to Shoplot and Restoran Near to BUS STATION Near to Pe…	2021-10-11	Taman Bukit Dahlia	Pasir Gudang	Durian	Terrace House	Taman Bukit Dahlia, Pasir Gudang - Terrace House For Sale	Tenanted	-1	-1	Intermediate Lot	1076	-1	-1	315.985	-1	-1	https://cdn.durianproperty.com.my/images/classified_ads/302667911877224.jpg
680000	1135	2	Fully Furnished	4	Freehold	2	REN No.: 12681	Zakiuddin Bin Abdul Majid	https://www.durianproperty.com.my/classified/3001701/Lexa-Residence-The-Quartz-WM-Serviced-Residence-for-sale-by-Zakiuddin-Bin-Abdul-Majid	Tell Zakiuddin Bin Abdul Majid you saw this ad from DurianProperty to get best deal.FOR SALE | FOR SALE Lexa Residence @ The Quartz, Wangsa Maju Newly VP /completed condo at Wangsa Maju. - Modern ID - Fully furnished - Fully air-cond x 5 unit - Very big balcony. Rare type PROPERTY DETAILS ---------------------------- - 1135 sqft [ Very big balcony. Rare type ] - Freehold - Corner unit - 4 Bedroom…	2021-10-11	Lexa Residence @ The Quartz WM	Wangsa Maju	Durian	Serviced Residence	Lexa Residence @ The Quartz WM, Wangsa Maju - Serviced Residence For Sale	Vacant	-1	-1	Corner Lot	-1	-1	-1	-1	-1	-1	https://cdn.durianproperty.com.my/images/classified_ads/300170111698835.jpg
1280000	2800	4	na	5	Leasehold	na	na	Leon Lim	https://www.durianproperty.com.my/classified/3045474/Taman-Mutiara-Indah-Bungalow-House-for-sale-by-Leon-Lim	Tell Leon Lim you saw this ad from DurianProperty to get best deal.Mutiara Indah Puchong Bungalow (73 x 60) Double Storey Mutiara Indah Puchong Bungalow (73 x 60) Double Storey Mutiara Indah Puchong Land Size : 73 x 60 Selling Price : RM 1.28 Mil (Negotiable) Property Details : - Bungalow Double Storey - Leasehold , Non Bumi - Build-up : 2,800 - Land Area : 73 60, 4336 sqft - 5 Bedrooms + 4 Bathr…	2021-10-11	Taman Mutiara Indah	Puchong	Durian	Bungalow House	Taman Mutiara Indah, Puchong - Bungalow House For Sale	na	-1	-1	na	4336	-1	-1	295.203	-1	-1	https://cdn.durianproperty.com.my/images/classified_ads/304547412006489.jpeg
300000	1500	2	Fully Furnished	3	Freehold	2	REN No.: REN14407	Alice Tan	https://www.durianproperty.com.my/classified/3004821/Publika-Condo-for-sale-by-Alice-Tan	Tell Alice Tan you saw this ad from DurianProperty to get best deal.New Launch‼️ Greenery Forest View KL Freehold & Residential 6KM to KL City Centre ‼️PRICE FROM RM300,000 Only‼️ Easy Access to KL & PJ Low Density Come With 5 Lift 2-4 BEDROOM [731sqft-1220sqft] Monthly Installment from RM1500 Surrounding by MRT,LRT & KTM -1min to Duke Highway -2min walk to Private School -3min to Bank & Office -…	2021-10-11	Publika	Kuala Lumpur	Durian	Condo	Publika, Kuala Lumpur - Condo For Sale	na	-1	-1	Intermediate Lot	-1	-1	-1	-1	-1	-1	https://cdn.durianproperty.com.my/images/classified_ads/300482111720293.jpg
3900000	8222	5+	Unfurnished	6 + 1	Freehold	4	REN No.: REN00665	Andi Tee	https://www.durianproperty.com.my/classified/3001409/Country-Heights-Kajang-Bungalow-House-for-sale-by-Andi-Tee	Tell Andi Tee you saw this ad from DurianProperty to get best deal.Widuri Villas 3sty Bungalow For Sale Land area 7,244sqft to 8,525sqft Built up 6,555sqft & 8,222sqft 6+1 rooms 7 bathrooms Freehold Left 7 units Must view to appreciate! Price from RM3.2mill to RM3.98mill * Lot 1 with Private pool ,Land area 7,244sqft ,Built up 6,555sqft * Lot 2 with Private pool ,Land area 8,525sqft ,Built up 8,2…	2021-10-11	Country Heights Kajang	Kajang	Durian	Bungalow House	Country Heights Kajang, Kajang - Bungalow House For Sale	Vacant	-1	-1	Corner Lot	8525	-1	-1	457.478	-1	-1	https://cdn.durianproperty.com.my/images/classified_ads/300140911697040.jpg
295000	820	2	Partly Furnished	3	Leasehold	1	na	Felixia Wong	https://www.durianproperty.com.my/classified/3010286/Lestari-Apartment-Apartment-for-sale-by-Felixia-Wong	Tell Felixia Wong you saw this ad from DurianProperty to get best deal.Amenities & Nearby : - LRT Bdr Tun Razak 1km - LRT Salak Selatan 700meter - Hosp. Uni Kebangsaan (HUKM) - Petronas, Shell, Shoplot, JPJ (banks,gym,restaurant,workshop,hotel) -Tasik Permaisuri (jogging tracks,playground,futsal court) -Kompleks Renang Kuala Lumpur -KL Cheras Downtown *** BELOW MARKET PRICE *** ***Looking for SER…	2021-10-11	Lestari Apartment	Bandar Sri Permaisuri	Durian	Apartment	Lestari Apartment, Bandar Sri Permaisuri - Apartment For Sale	na	-1	-1	na	-1	-1	-1	-1	-1	-1	https://cdn.durianproperty.com.my/images/classified_ads/301028611758267.png
920000	2500	3	Unfurnished	7	Leasehold	5+	na	-1	https://www.durianproperty.com.my/classified/3009502/Kawasan-Kempas-Banjaran-Bungalow-House-for-sale-by-Muhammad-Faiz-Bin-Samsudin	Tell Muhammad Faiz Bin Samsudin you saw this ad from DurianProperty to get best deal.- wide land, quiet environment. - nice for big family & stay after retired - 0.6km to Kempas Mart - 2.0km to Hospotal Permai - 2.2km to Masjid Tmn Anggerik - 3.0km to KPJ Kempas - 3.5km to Paradigm Mall JB - 10km to Bandaraya JBYou may view Kawasan Kempas Banjaran Profile here.	2021-10-11	Kawasan Kempas Banjaran	Johor Bahru	Durian	Bungalow House	Kawasan Kempas Banjaran, Johor Bahru - Bungalow House For Sale	Owner Occupied	-1	-1	na	10000	-1	-1	92	-1	-1	https://cdn.durianproperty.com.my/images/classified_ads/300950211752995.jpeg
2600000	6081	5+	Fully Furnished	5	Freehold	5+	na	Adam Baharum	https://www.durianproperty.com.my/classified/3044097/78-LAD-Condo-for-sale-by-Adam-Baharum	Tell Adam Baharum you saw this ad from DurianProperty to get best deal.78 LAD Condominium Triplex Ampang Details ======== -Below Market Value -Low Density -3 Storey -Freehold, Non Bumi -Built Up 6081 Sq Ft -5 Bedrooms -6 Bathrooms -3 Store -3 Living Room -2 Kitchen Area -1 Wardrobe Room -7 Lot Carpark -Privacy Area -Jacuzzi with Bathtub -Kitchen Cabinet -Oven and Kitchen Hob -Airconds -Wardrobes …	2021-10-11	78 LAD	Ampang Hilir	Durian	Condo	78 LAD, Ampang Hilir - Condo For Sale	na	-1	-1	na	-1	-1	-1	-1	-1	-1	https://cdn.durianproperty.com.my/images/classified_ads/304409711997622.jpg
690000	2260	3	Partly Furnished	4	Freehold	2	na	Seah	https://www.durianproperty.com.my/classified/3020250/Bandar-Tasek-Mutiara-Terrace-House-for-sale-by-Seah	Tell Seah you saw this ad from DurianProperty to get best deal.Simpang Ampat Bandar Tasek Mutiara * Double Storey Corner * 4 Bedrooms 3 Bathrooms * Build up: 2260 sft * Landsize: 20x80 sft Sell Rm 690k Rent Rm 1500 Accessibility: - Walking distance to CMart, GEMS - 5 Minutes to KTM and market - 10 Minutes to Nouth south highway -10 Minutes to Science Park , Juru Industrial Park and Batu Kawan - 1…	2021-10-11	Bandar Tasek Mutiara	Simpang Ampat	Durian	Terrace House	Bandar Tasek Mutiara, Simpang Ampat - Terrace House For Sale	na	-1	-1	Corner Lot	1600	-1	-1	431.25	-1	-1	https://cdn.durianproperty.com.my/images/classified_ads/302025011829620.jpg
386000	2380	4	Partly Furnished	4	Freehold	2	na	Darren Gan	https://www.durianproperty.com.my/classified/3041052/Taman-Pelangi-Semenyih-2-Terrace-House-for-sale-by-Darren-Gan	Tell Darren Gan you saw this ad from DurianProperty to get best deal."Freehold & Landed DoubleStorey Gated&Guarded 20x70 / 24x70 / 24x75 / 44x70 / 45x85 / Corner / End Lot / SemiD Most value-worth Terrace in town Premium Designs for Luxurious Living -Please contact [Mr Darren Gan 01156839558] Details # Freehold - Individual Title # Gated & Guarded # Fully Extend [Carpoach & Kitchen] # 4bedrooms 4…	2021-10-11	Taman Pelangi Semenyih 2	Semenyih	Durian	Terrace House	Taman Pelangi Semenyih 2, Semenyih - Terrace House For Sale	na	-1	-1	na	-1	-1	-1	-1	-1	-1	https://cdn.durianproperty.com.my/images/classified_ads/304105211973113.jpg
398700	1815	3	Unfurnished	5	Freehold	2	REN No.: 45127	Abd Salam Adam	https://www.durianproperty.com.my/classified/3047860/Taman-Mawar-Terrace-House-for-sale-by-abd-salam-adam	Tell abd salam adam you saw this ad from DurianProperty to get best deal.KHAS UNTUK KAKITANGAN KERAJAAN CASH REBATE RM44,300.00 (jika Apply 100% loan) ZERO BOOKING FEES ZERO DEPOSIT PERCUMA YURAN GUAMAN Penjanjian Jual Beli PERCUMA Stamp Duty FREEHOLD MALAY RESERVE Rekabentuk moden dengan ruang bersantai di hadapan rumah (tingkat atas).. Individu Septik tank Dinding IBS + Konkrit + Bata Merah (Ru…	2021-10-11	Taman Mawar	Banting	Durian	Terrace House	Taman Mawar, Banting - Terrace House For Sale	na	-1	-1	Intermediate Lot	1280	-1	-1	311.484	-1	-1	https://cdn.durianproperty.com.my/images/classified_ads/304786012021081.jpg
550000	1635	3	Partly Furnished	4	Leasehold	na	na	Sahrul Lizam Bin Ismail	https://www.durianproperty.com.my/classified/3006948/Eco-Grandeur-Terrace-House-for-sale-by-Sahrul-Lizam-Bin-Ismail	Tell Sahrul Lizam Bin Ismail you saw this ad from DurianProperty to get best deal.Double Storey GRAHAM GARDEN Eco Grandeur - Puncak Alam Intermediate Unit - Type C ASKING PRICE : RM550,000 Property Details : - Land Area : 1,300 sqft (20'x65') - Build Up : 1,635 sqft - Rooms : 3 + 1 - Bathroom : 3 - Leasehold - Non Bumi Lot Key Features and Facilities : - Dragonfly lake - Cycling and walking paths…	2021-10-11	Eco Grandeur	Bandar Puncak Alam	Durian	Terrace House	Eco Grandeur, Bandar Puncak Alam - Terrace House For Sale	na	-1	-1	na	1300	-1	-1	423.077	-1	-1	https://cdn.durianproperty.com.my/images/classified_ads/300694811735983.jpg
580000	1400	3	Unfurnished	4	Leasehold	na	na	Ramlah	https://www.durianproperty.com.my/classified/3037757/Taman-Puncak-Jalil-Terrace-House-for-sale-by-ramlah	Tell ramlah you saw this ad from DurianProperty to get best deal.PUNCAK JALIL 4 (PUJ 4) DOUBLE STORY NEAR BUKIT JALIL / BANDAR KINRARA. ======================= DETAILS : ** Non Bumi Lot ** Land : 20 x 70 ** 4 Bedrooms & 3 bathrooms ** Tenure : Leasehold ** Extra Land Backyard ** Full Tiles ** Kitchen Cabinet ** Full house Aircond Nearby Amenities: - 5 min to nearby commercial area PUJ 3, Petrol S…	2021-10-11	Taman Puncak Jalil	Seri Kembangan	Durian	Terrace House	Taman Puncak Jalil, Seri Kembangan - Terrace House For Sale	na	-1	-1	na	-1	-1	-1	-1	-1	-1	https://cdn.durianproperty.com.my/images/classified_ads/303775711951706.jpg
300000	1100	2	Partly Furnished	3	Freehold	2	na	Angelica Lim	https://www.durianproperty.com.my/classified/3049444/PPA1M-Bukit-Jalil-Condo-for-sale-by-Angelica-Lim	Tell Angelica Lim you saw this ad from DurianProperty to get best deal.Below 30% Market Price New Township Investment AirBnB Luxury 5star Condo @ Tourist Hotspot We Help Rent, We Help Manage, We Help You Earn! .- Price from RM250k, Monthly Installment: RM1100 .- We Help You Rent: RM2200 .- After 5 Years Earn More RM150K CMCO Limited Promo ** 0% Downpayment ** FREE ALL Legal + Disbursement Fees + …	2021-10-11	PPA1M Bukit Jalil	Bukit Jalil	Durian	Condo	PPA1M Bukit Jalil, Bukit Jalil - Condo For Sale	na	-1	-1	na	-1	-1	-1	-1	-1	-1	https://cdn.durianproperty.com.my/images/classified_ads/304944412032666.JPG
85000	880	2	Unfurnished	3	Freehold	0	REN No.: 40045	Zeff Tan	https://www.durianproperty.com.my/classified/3048185/Taman-Sentosa-Apartment-for-sale-by-Zeff-Tan	Tell Zeff Tan you saw this ad from DurianProperty to get best deal.Shop Apartment,Jln Dagang, Taman Sentosa 3 room/ 2 bathroom 880 sqft 2rd floor Basic house Selling Price only 85k #Klang #Klangpropertyforsale #Klangpropertywanted Kindly Contact : Call/ whatsapp - Zeff Tan 0198403023 (REN 40045) THE ROOF REALTY (E(3)1462)You may view Taman Sentosa Profile here.	2021-10-11	Taman Sentosa	Klang	Durian	Apartment	Taman Sentosa, Klang - Apartment For Sale	na	-1	-1	na	-1	-1	-1	-1	-1	-1	https://cdn.durianproperty.com.my/images/classified_ads/304818512023678.jpeg
2300000	2100	na	Unfurnished	na	Leasehold	na	REN No.: 15525	Jimmy Goh	https://www.durianproperty.com.my/classified/2946425/Pandan-Perdana-Shop-for-sale-by-Jimmy-Goh	Tell Jimmy Goh you saw this ad from DurianProperty to get best deal.Shop, Corner Pandan Perdana, Cheras Beside MRR2 (Highway) (Q 1931) @ Land Area 30x70 @ Built Up 2,100 sf @ Corner -Near by- - Taman Shamelin - Taman Pertama - Taman Midah - Taman Kencana - Taman Maluri - Pandan Indah - Pandan Jaya - Kampung Cheras Baru Amenities: - Easy Access to MRR2 Highway - KL City - Kajang SALE: RM 2,300,000…	2021-10-11	Pandan Perdana	Kuala Lumpur	Durian	Shop	Pandan Perdana, Kuala Lumpur - Shop For Sale	Tenanted	-1	-1	Corner Lot	2100	-1	-1	1095.24	-1	-1	https://cdn.durianproperty.com.my/images/classified_ads/294642511328638.jpg
355000	1940	3	Partly Furnished	4	Freehold	2	REN No.: 26450	Said	https://www.durianproperty.com.my/classified/2995962/Taman-Suliana-Terrace-House-for-sale-by-said	Tell said you saw this ad from DurianProperty to get best deal.Rumah Untuk Dijual ================ Teres 2 Tingkat , Taman Suliana , Sikamat ( RENOVATED ) ================================== Details ======= Freehold ( Bumilot ) 4 Bilik + 3 Bilik Air Size : 1,540 sqft Intermediate SPECIAL FEATURES: - Autogate - Extanded Kitchen - Fully Grill Installed - Kitchen Cabinet - Car Porch - Plaster Ceiling…	2021-10-11	Taman Suliana	Seremban	Durian	Terrace House	Taman Suliana, Seremban - Terrace House For Sale	Vacant	-1	-1	Intermediate Lot	1400	-1	-1	253.571	-1	-1	https://cdn.durianproperty.com.my/images/classified_ads/299596211663150.jpeg
850000	2700	4	Unfurnished	5	Leasehold	na	REN No.: 40849	Fatimah Rashidi	https://www.durianproperty.com.my/classified/3025174/Bandar-Saujana-Utama-Semi-D-for-sale-by-Fatimah-Rashidi	Tell Fatimah Rashidi you saw this ad from DurianProperty to get best deal.2 Storey Semi-D Sinar Warisan, BUKIT SAUJANA, Saujana Utama ,oh Asking Price : RM850k negotiable Property Details: + Type : Semi-Detached + Leasehold Non bumi lot + Built Up is 2700sqft + Land Area 3600 sqft + 5 Bedroom + 4 Bathroom ( Bathroom at Master Bedroom have 1 bath tube) + Basic and vacant unit + Guarded area with B…	2021-10-11	Bandar Saujana Utama	Sungai Buloh	Durian	Semi D	Bandar Saujana Utama, Sungai Buloh - Semi D For Sale	Vacant	-1	-1	Corner Lot	3600	-1	-1	236.111	-1	-1	https://cdn.durianproperty.com.my/images/classified_ads/302517411866548.jpeg
250000	930	2	Partly Furnished	3	Freehold	2	REN No.: 23897	Renriz	https://www.durianproperty.com.my/classified/3037633/Taman-Kasturi-Apartment-for-sale-by-renriz	Tell renriz you saw this ad from DurianProperty to get best deal.Nice Corner Shop Apartment Taman Kasturi Batu 9 Balakong Cheras For Sale ====================== DETAILS: - Freehold - Size: 930 sqft - 3 Bedrooms - 2 Bathrooms - Plastered ceiling - Tenanted . AMENITIES: - Walking distance to MRT station Batu 11 Cheras - Business center - The Mines / Mines Resort City / The Mines Resort and Golf Clu…	2021-10-11	Taman Kasturi	Balakong	Durian	Apartment	Taman Kasturi, Balakong - Apartment For Sale	Tenanted	-1	-1	Corner Lot	-1	-1	-1	-1	-1	-1	https://cdn.durianproperty.com.my/images/classified_ads/303763311950602.jpeg
328000	1400	2	Partly Furnished	3	Freehold	2	REN No.: 06175	Wayne Chai	https://www.durianproperty.com.my/classified/3051341/Villa-Kesuma-Townhouse-for-sale-by-Wayne-Chai	Tell Wayne Chai you saw this ad from DurianProperty to get best deal.For Sale : Townhouse, Villa Kesuma, Beranang, Kajang BELOW MARKET VALUE !!!! • 20x70 • 1400sf • Freehold • 3 Rooms 2 Baths • Ground Floor • Townhouse unit • Facing to South • Kitchen Cabinet • Tiles flooring • Gated & guarded • Currently tenanted ================ Selling RM 328,000 ================ Don't Miss Out!! Call Me Today…	2021-10-11	Villa Kesuma	Beranang	Durian	Townhouse	Villa Kesuma, Beranang - Townhouse For Sale	Tenanted	-1	South	Intermediate Lot	1400	-1	-1	234.286	-1	-1	https://cdn.durianproperty.com.my/images/classified_ads/305134112046163.jpeg
1050000	1710	4	Fully Furnished	4	Freehold	2	REN No.: PEA3045	Vincent Lau	https://www.durianproperty.com.my/classified/3021648/Le-Yuan-Residence-Condo-for-sale-by-Vincent-Lau	Tell Vincent Lau you saw this ad from DurianProperty to get best deal.**Le Yuan Residence @ Kuchai Lama** (Condominium unit) for SALE Property Info: - Build up : 1,710 sqft - 4 Bedrooms, 4 Bathrooms, 2 Carparks - FREEHOLD - FULLY FURNISHED - RENOVATED - BEACH & SWIMMING POOL VIEW - NICE GREENARY - Gated & Guarded (24-hours security) - Facing South - With facilities - Nice location - Well maintain…	2021-10-11	Le Yuan Residence	Kuchai Lama	Durian	Condo	Le Yuan Residence, Kuchai Lama - Condo For Sale	Vacant	-1	-1	Intermediate Lot	-1	-1	-1	-1	-1	-1	https://cdn.durianproperty.com.my/images/classified_ads/302164811838968.jpeg
755000	2000	4	Partly Furnished	4	Freehold	na	REN No.: 10356	Anne Annuar	https://www.durianproperty.com.my/classified/3043715/Bandar-Parklands-Terrace-House-for-sale-by-Anne-Annuar	Tell Anne Annuar you saw this ad from DurianProperty to get best deal.DOUBLE STOREY ENDLOT BANDAR PARKLANDS KLANG * Deposit boleh dibincangkan, EPF acc2 boleh diterima * Loan dan lawyer boleh diuruskan * Jaminan 100% pulangan balik booking jika loan tidak lulus * Interest rate serendah 3% DESCRIPTION Type: Double Storey ENDLOT Tenure: FREEHOLD Land Area: 32x75 sqft Built Up: 2,000 sqft (approx) R…	2021-10-11	Bandar Parklands	Klang	Durian	Terrace House	Bandar Parklands, Klang - Terrace House For Sale	na	-1	-1	na	2400	-1	-1	314.583	-1	-1	https://cdn.durianproperty.com.my/images/classified_ads/304371511994432.jpeg
245000	1378	2	na	3	Freehold	na	na	Nurul Ashikin Binti Mohd Ishak	https://www.durianproperty.com.my/classified/3015494/Kampung-Padang-Terrace-House-for-sale-by-Nurul-Ashikin-Binti-Mohd-Ishak	Tell Nurul Ashikin Binti Mohd Ishak you saw this ad from DurianProperty to get best deal.Teres Setingkat Kampung Padang Kuantan FREEHOLD Perumahan Perkampungan Padang Jaya ASKING PRICE: RM245,000 (NEGO) MARKET VALUE: RM250,000 Details: -Freehold -Single storey terrace -Build up 900 sqft -Land area 1378 sqft -3 bedroom 2 bathroom Amenities: -Mr DIY -Pasaraya LYC -7 Eleven -Laundry Hub -Yi Jia Supe…	2021-10-11	Kampung Padang	Kuantan	Durian	Terrace House	Kampung Padang, Kuantan - Terrace House For Sale	na	-1	-1	na	1378	-1	-1	177.794	-1	-1	https://cdn.durianproperty.com.my/images/classified_ads/301549411795747.jpg
6000000	7000	5	Partly Furnished	4 + 4	Freehold	2	na	Lau3003	https://www.durianproperty.com.my/classified/3016564/Taman-Desa-Bungalow-House-for-sale-by-lau3003	Tell lau3003 you saw this ad from DurianProperty to get best deal.==> CALL LAU 0103669320 (registered real estate agent with MIEA with REN 06302) FOR MORE INFO/ VIEWING! Details for this unit: - Land area: 6843 square ft. - Built up : 4 storeys total 7000 square ft. Rooms: a. 4 x bedrooms all with attached toilet & bathrooms on 1st & 2nd floors. b. 1 x office/study room on 1st floor. c. 1 x child…	2021-10-11	Taman Desa	Kuala Lumpur	Durian	Bungalow House	Taman Desa, Kuala Lumpur - Bungalow House For Sale	na	-1	-1	na	6843	-1	-1	876.808	-1	-1	https://cdn.durianproperty.com.my/images/classified_ads/301656411802617.jpg
530000	2380	4	Partly Furnished	4	Leasehold	2	REN No.: 19168	Taufiq Mansor	https://www.durianproperty.com.my/classified/3034184/Taman-Cheras-Jaya-Terrace-House-for-sale-by-Taufiq-Mansor	Tell Taufiq Mansor you saw this ad from DurianProperty to get best deal.EXTEND & RENO 2.5 storey Terrace FOR SALE Taman Cheras Jaya, Cheras DETAILS: - Tenure: Leasehold expiring in 2090 (Non-bumi lot) - Built Up: Approx. 2,380 sqft - Land area: 18 x 60 ft - Bedroom: 4 - Bathroom: 4 - 2 Car Park in garage - Facing South - Renovated with tiles flooring & extended kitchen (with approval) PARTIALLY F…	2021-10-11	Taman Cheras Jaya	Balakong	Durian	Terrace House	Taman Cheras Jaya, Balakong - Terrace House For Sale	na	-1	-1	na	1080	-1	-1	490.741	-1	-1	https://cdn.durianproperty.com.my/images/classified_ads/303418411927358.jpg
210000	1000	2	Unfurnished	3	Freehold	na	REN No.: 26450	Said	https://www.durianproperty.com.my/classified/3025799/Taman-Desa-Puteri-Terrace-House-for-sale-by-said	Tell said you saw this ad from DurianProperty to get best deal.Taman Desa Puteri Bahau Negeri Sembilan Details @ Taman Desa Puteri Bahau Negeri Sembilan ============ ===== Freehold ( Bumilot ) 3 Bilik + 2 Bilik Air Land Area : 1,540 sqft Basic Unit KEMUDAHAN @ Taman Desa Puteri Bahau Negeri Sembilan ============ Klinik 1 Malaysia Billion Pasaraya Econsave Banks Secret Recipe Shoplots AMENITIES @ …	2021-10-11	Taman Desa Puteri	Bahau	Durian	Terrace House	Taman Desa Puteri, Bahau - Terrace House For Sale	Vacant	-1	-1	Intermediate Lot	1540	-1	-1	136.364	-1	-1	https://cdn.durianproperty.com.my/images/classified_ads/302579911871334.jpeg
738888	2863	4	Unfurnished	4 + 1	Freehold	2	na	Alice Tan	https://www.durianproperty.com.my/classified/3028439/Bandar-Sri-Sendayan-Superlink-for-sale-by-Alice-Tan	Tell Alice Tan you saw this ad from DurianProperty to get best deal."Modern Design With Lowest Maintanance Fees Greenery Towlship,80%Person Surounding Near Shoplot,Shopping Mall Freehold/ Gated-Guarded/ 0 Downpayment/ Instant Cashback * English contemporary style. * Beautiful Garden Concept, English Style * Private Clubhouse * Gated & Guarded AMENITIES * Hospital UITM * SK, SJKC, SMK * Internatio…	2021-10-11	Bandar Sri Sendayan	Seremban	Durian	Superlink	Bandar Sri Sendayan, Seremban - Superlink For Sale	na	-1	-1	Intermediate Lot	-1	-1	-1	-1	-1	-1	https://cdn.durianproperty.com.my/images/classified_ads/302843911889049.jpeg
650000	1687	3	Partly Furnished	4	Freehold	2	na	Farrid	https://www.durianproperty.com.my/classified/3019780/Alam-Sari-Terrace-House-for-sale-by-Farrid	Tell Farrid you saw this ad from DurianProperty to get best deal.- Double Storey Terrace House Ilmia 1, Setia Alam Sari Bangi - Fully Renovated & Extended - Air Conditioned - Full Kitchen Cabinet - Fans & Lightings - Fully Grille - Alarm System - AutoGate ============================================= Asking Price : RM650,000 (Negotiable0 ============================================= Kindly contac…	2021-10-11	Alam Sari	Bangi	Durian	Terrace House	Alam Sari, Bangi - Terrace House For Sale	na	-1	-1	Intermediate Lot	-1	-1	-1	-1	-1	-1	https://cdn.durianproperty.com.my/images/classified_ads/301978011826172.jpg
318000	1003	2	Fully Furnished	3	Freehold	1	REN No.: 26088	Bernice Tee	https://www.durianproperty.com.my/classified/3041746/Permas-Ville-Apartment-for-sale-by-Bernice-Tee	Tell Bernice Tee you saw this ad from DurianProperty to get best deal.Permas Ville Apartment, Bandar Baru Permas Jaya, Permas Jaya Permas Ville (Permas Jaya) - Apartment - 1,003 - Partial Renovated - 3Bedrooms , 2Bathrooms - Freehold - International Lot - Intermediate Lot - Maintenance Fee 180/mth Selling Price 318k Bank Value 360k~380k For more information pls contact Bernice 0127131290You may v…	2021-10-11	Permas Ville	Permas Jaya	Durian	Apartment	Permas Ville, Permas Jaya - Apartment For Sale	Owner Occupied	-1	-1	Intermediate Lot	-1	-1	-1	-1	-1	-1	https://cdn.durianproperty.com.my/images/classified_ads/304174611979092.jpg
1095863	1719	3	Partly Furnished	3 + 1	Leasehold	2	na	Gary Lim	https://www.durianproperty.com.my/classified/3038353/Jesselton-Twin-Towers-Condo-for-sale-by-Gary-Lim	Tell Gary Lim you saw this ad from DurianProperty to get best deal.JESSELTON TWIN TOWERS Location - Located at Prime Location - Behind KPJ & QE2 - Beside City Mall Kota Kinabalu, Sabah - Surrounded with VIP lots - Government sector - Better Environment __________________________________________________ Accessibility Shopping & Leisure ( within 10 mins drive ) - Imago Shopping Mall - Suria Sabah H…	2021-10-11	Jesselton Twin Towers	Kota Kinabalu	Durian	Condo	Jesselton Twin Towers, Kota Kinabalu - Condo For Sale	Vacant	-1	-1	Corner Lot	-1	-1	-1	-1	-1	-1	https://cdn.durianproperty.com.my/images/classified_ads/303835311954999.jpg
430000	950	2	na	3	Freehold	1	na	Cl Loh	https://www.durianproperty.com.my/classified/3035920/Melati-Apartments-Apartment-for-sale-by-CL-Loh	Tell CL Loh you saw this ad from DurianProperty to get best deal.Melati Apartment @ Sungai Nibong 1st floor @ Low Density Type : Apartment Tenure : Freehold Built-up : 950 sq ft Car Park : 1 No. of Bedrooms : 3 No. of Bathrooms : 2 Condition : Renovated Price : RM430,000.00 (View & offer) Call CL Loh (PEA 0660) at 012 - 493 7415 for viewing!! Website : Website : TODAY PROPERTIES (E(3)1080)Please …	2021-10-11	Melati Apartments	Taman Sri Nibong	Durian	Apartment	Melati Apartments, Taman Sri Nibong - Apartment For Sale	na	-1	-1	na	-1	-1	-1	-1	-1	-1	https://cdn.durianproperty.com.my/images/classified_ads/303592011938689.JPG
265000	850	2	Partly Furnished	3	Freehold	2	REN No.: 22296	Gavin Lau	https://www.durianproperty.com.my/classified/3016513/Salak-Perdana-Condo-for-sale-by-Gavin-Lau	Tell Gavin Lau you saw this ad from DurianProperty to get best deal.{{{ 50 Unit Terakhir }}} Sampai Bila Korang Nak Sewa Rumah??? Ambik Peluang Ini SEKARANG Kalau Nak Miliki Rumah Sendiri! Bayaran Instalment Bulanan RM1,000 Dgn Max Tempoh Pinjaman 35 Tahun Pendapatan RM3k-RM10k (Seisi Rumah) Syarat-Syarat: *Berumur lebih dari 18 tahun *Warganegara Malaysia *Belum lagi memiliki hartanah di Selango…	2021-10-11	Salak Perdana	Sepang	Durian	Condo	Salak Perdana, Sepang - Condo For Sale	Vacant	-1	-1	Intermediate Lot	-1	-1	-1	-1	-1	-1	https://cdn.durianproperty.com.my/images/classified_ads/301651311802230.jpg
7000000	11000	5+	Partly Furnished	6 + 4	Freehold	5+	REN No.: REN00665	Andi Tee	https://www.durianproperty.com.my/classified/3039293/Putra-Heights-Bungalow-House-for-sale-by-Andi-Tee	Tell Andi Tee you saw this ad from DurianProperty to get best deal.Putra Crest 2sty Bungalow For Sale Spacious layout designed with contemporary architecture! Quiet serenity & Greenery surroundings! Sweet & cozy home! Private garden with fish pond 6 rooms + 4 store rooms Gated & Guarded Move in condition! Must view to appreciate! Please call to arrange viewing: Andi Tee +6012-209 7573 REN 00665 S…	2021-10-11	Putra Heights	Subang Jaya	Durian	Bungalow House	Putra Heights, Subang Jaya - Bungalow House For Sale	Owner Occupied	-1	-1	Intermediate Lot	22000	-1	-1	318.182	-1	-1	https://cdn.durianproperty.com.my/images/classified_ads/303929311960887.jpeg
875000	2659	5	Unfurnished	5	Freehold	2	REN No.: 2615	Mohd Faiz Ellias	https://www.durianproperty.com.my/classified/3022670/Legundi-Residensi-Semi-D-for-sale-by-Mohd-Faiz-Ellias	Tell Mohd Faiz Ellias you saw this ad from DurianProperty to get best deal.FOR SALE 2 Storey Semi D Cluster Legundi Residensi Bandar Seri Putra Bangi Freehold 5 BED 5 BATH LA 35x75 BU 2659 sft Gated Guarded Table Top *Near* - Bandar Bukit Mahkota, Bandar Puteri Bangi, Bangi Avenue, Semenyih *Amenities* - Masjid Bandar Seri Putra Tesco Bandar Puteri CS Bangi Avenue Bangi Wonderland Price: RM 875K …	2021-10-11	Legundi Residensi	Bandar Seri Putra	Durian	Semi D	Legundi Residensi, Bandar Seri Putra - Semi D For Sale	Owner Occupied	-1	-1	Intermediate Lot	2625	-1	-1	333.333	-1	-1	https://cdn.durianproperty.com.my/images/classified_ads/302267011847186.jpg
3980000	4548	5+	Partly Furnished	4 + 1	Leasehold	5	na	Lau3003	https://www.durianproperty.com.my/classified/3034478/Armada-Villa-Semi-D-for-sale-by-lau3003	Tell lau3003 you saw this ad from DurianProperty to get best deal.==> CALL LAU 0103669320 (registered real estate agent with MIEA with REN 06302) FOR MORE INFO/ VIEWING! 4 Sty Semi D @ Armada Villa - Renovated & Furnished Unit - Facing Lake View - Facing West Details: - Land Area 4,549sf - Built up 4,548f - 4+1 Bedrooms & 6 Bathrooms - Built In Kitchen Cabinet Wet & Dry together Appliances - Bedr…	2021-10-11	Armada Villa	Taman Desa	Durian	Semi D	Armada Villa, Taman Desa - Semi D For Sale	Vacant	-1	-1	Intermediate Lot	4549	-1	-1	874.918	-1	-1	https://cdn.durianproperty.com.my/images/classified_ads/303447811929753.jpg
285000	750	2	Fully Furnished	2	Freehold	1	REN No.: 18895	Tommy Lye	https://www.durianproperty.com.my/classified/3037951/Nusa-Heights-Serviced-Residence-for-sale-by-Tommy-Lye	Tell Tommy Lye you saw this ad from DurianProperty to get best deal.For Sale Nusa Heights, Gelang Patah - Block A - Middle floor - Facing behind kampung view - built up 750 sqft - 2 Bedrooms 2 Bathrooms - Fully furnished - Included all Furniture and electrical appliances - 24 hours security (gated and guarded) - One covered parking lot - non bumi lot - master title - Asking price NOW RM285k nett …	2021-10-11	Nusa Heights	Nusajaya	Durian	Serviced Residence	Nusa Heights, Nusajaya - Serviced Residence For Sale	Vacant	-1	-1	End Lot	-1	-1	-1	-1	-1	-1	https://cdn.durianproperty.com.my/images/classified_ads/303795111953212.jpg
880000	935	2	Fully Furnished	2	Leasehold	1	REN No.: 06279	Joanne Than	https://www.durianproperty.com.my/classified/2888361/KL-Gateway-Serviced-Residence-for-sale-by-Joanne-Than	Tell Joanne Than you saw this ad from DurianProperty to get best deal.KL Gateway Residence 2 bedrooms 2 baths 935sq ft High Floor Pool view 100m covered link bridge to University LRT Good buy Selling with tenancy RM688K only!!! Joanne +6016 6268226 (REN06279) E(1) 1439Please see more of my listings at http://joannethan.myagent.my/.You may view KL Gateway Profile here.	2021-10-11	KL Gateway	Bangsar South	Durian	Serviced Residence	KL Gateway, Bangsar South - Serviced Residence For Sale	Tenanted	-1	-1	End Lot	-1	-1	-1	-1	-1	-1	https://cdn.durianproperty.com.my/images/classified_ads/288836110994139.jpeg
2200000	7000	na	na	na	Leasehold	na	REN No.: 15525	Jimmy Goh	https://www.durianproperty.com.my/classified/2661387/Hi-Tech-Semi-D-Factory-for-sale-by-Jimmy-Goh	Tell Jimmy Goh you saw this ad from DurianProperty to get best deal.Kawasan Perindustrian Hi-Tech 3, Semenyih 1.5 Storey Semi-D Factory (R 227) @ Land Area 13,000 sf @ Built up 7,000 sf @ Power Supply 200 AMP @ Ceiling Height 30 Ft @ Leasehold @ Motorized roller shutter Near by- - Taman Perindustrian Sri Haneco - Taman Sri Tanjung - Perusahaan Mahkota, Semenyih, Villaraya, Beranang, Nilai, Kajang…	2021-10-11	Hi-Tech	Semenyih	Durian	Factory	Hi-Tech, Semenyih - Semi-D Factory For Sale	Vacant	-1	-1	Intermediate Lot	13000	-1	-1	169.231	-1	-1	https://cdn.durianproperty.com.my/images/classified_ads/26613879888383.jpg
470000	2002	3	Unfurnished	4	Freehold	2	REN No.: 44612	Muhd Hanif	https://www.durianproperty.com.my/classified/3040591/Taman-Permatang-Sintuk-Semi-D-for-sale-by-Muhd-Hanif	You may view Taman Permatang Sintuk Profile here.	2021-10-11	Taman Permatang Sintuk	Penang	Durian	Semi D	Taman Permatang Sintuk, Penang - Semi D For Sale	Vacant	-1	-1	End Lot	-1	-1	-1	-1	-1	-1	https://cdn.durianproperty.com.my/images/classified_ads/304059111969840.jpeg
878000	1260	2	Fully Furnished	4	Leasehold	na	REN No.: 26151	Jasang	https://www.durianproperty.com.my/classified/3005240/Marinox-Sky-Villas-Condo-for-sale-by-jasang	Tell jasang you saw this ad from DurianProperty to get best deal.Marinox Sky Villas For Sales 1260 sf 4 Bedroom 2 Bathroom 2 Carpark Fully furnished Fully Renovated Asking price RM878000 For More Information, Kindly Contatc Jas Ang 012-4081848 Centeline AsiaYou may view Marinox Sky Villas Profile here.	2021-10-11	Marinox Sky Villas	Seri Tanjung Pinang	Durian	Condo	Marinox Sky Villas, Seri Tanjung Pinang - Condo For Sale	na	-1	-1	na	-1	-1	-1	-1	-1	-1	https://cdn.durianproperty.com.my/images/classified_ads/300524011723225.jpeg
915000	2429	4	Partly Furnished	4 + 1	Freehold	na	REN No.: PEA1332	George Loh	https://www.durianproperty.com.my/classified/2980697/Laman-Glenmarie-Superlink-for-sale-by-GEORGE-LOH	Tell GEORGE LOH you saw this ad from DurianProperty to get best deal.If you want to know more about Laman Glenmarie House, please feel free to contact agent, George Loh at Tel. or WhatsApp: 0162823823 Other properties owners are also welcome to contact me if you want to use our marketing services to promote or list your properties on the market. I had sold 9 houses at Laman Glenmarie already, I w…	2021-10-11	Laman Glenmarie	Shah Alam	Durian	Superlink	Laman Glenmarie, Shah Alam - Superlink For Sale	na	-1	-1	Intermediate Lot	1760	-1	-1	519.886	-1	-1	https://cdn.durianproperty.com.my/images/classified_ads/298069711559702.jpg
530000	1000	2	Fully Furnished	3	Freehold	2	na	Angel Fong	https://www.durianproperty.com.my/classified/3020206/Publika-Condo-for-sale-by-Angel-fong	You may view Publika Profile here.	2021-10-11	Publika	Kuala Lumpur	Durian	Condo	Publika, Kuala Lumpur - Condo For Sale	na	-1	-1	na	-1	-1	-1	-1	-1	-1	https://cdn.durianproperty.com.my/images/classified_ads/302020611829279.jpg
268000	770	2	Unfurnished	6	Freehold	na	na	Kelvin Chop	https://www.durianproperty.com.my/classified/3013541/Bandar-Baru-Permas-Jaya-Terrace-House-for-sale-by-Kelvin-Chop	Tell Kelvin Chop you saw this ad from DurianProperty to get best deal.DOUBLE STOREY TERRACED LOW COST HOUSE FOR SALE * Low Cost House For First Time Buyer Only * Permas Jaya * 6 Bedrooms & 2 Bathrooms * Land Area 14x55 * Freehold * Facing Road * International Lot * No Co broke For This Unit * Owner listing are welcome. We will help you marketing your property and provide professional advice on cu…	2021-10-11	Bandar Baru Permas Jaya	Masai	Durian	Terrace House	Bandar Baru Permas Jaya, Masai - Terrace House For Sale	na	-1	-1	Intermediate Lot	-1	-1	-1	-1	-1	-1	https://cdn.durianproperty.com.my/images/classified_ads/301354111782619.jpg
429888	2159	3	na	4	Freehold	2	na	Jessica Chan	https://www.durianproperty.com.my/classified/3028230/Bandar-Bukit-Puchong-2-Terrace-House-for-sale-by-Jessica-Chan	Tell Jessica Chan you saw this ad from DurianProperty to get best deal.Free of all charges, absolutely no hidden charges - Refundable booking fee - No Down payment -KL, Selangor,Negeri Sembilan Area SELLING POINTS : - Gated and guarded, 24 hours surveillance - Free 2 years maintenance fee, broadband wifi, private clubhouse access - Semi Furnished - Township completed with ALL infrastructures ACCE…	2021-10-11	Bandar Bukit Puchong 2	Puchong	Durian	Terrace House	Bandar Bukit Puchong 2, Puchong - Terrace House For Sale	Vacant	-1	-1	Intermediate Lot	1300	-1	-1	330.683	-1	-1	https://cdn.durianproperty.com.my/images/classified_ads/302823011887514.jpg
455000	2700	4	Unfurnished	5	Freehold	na	na	Yvonne	https://www.durianproperty.com.my/classified/3004584/Bandar-Baru-Bangi-Terrace-House-for-sale-by-Yvonne	Tell Yvonne you saw this ad from DurianProperty to get best deal.[Beautiful Developing Township with lots of Facilities] Having A Home In High End Community Town Only RM1000 Booking!! Affordable Double Storey 24x75 Landed House * Lots Of School Established Within The Area, Only Few Min Distance * Within 5 min You Can reach Jusco (GSC), Tesco & Mydin * Damansara Concept Township With A Megamall Bi…	2021-10-11	Bandar Baru Bangi	Bangi	Durian	Terrace House	Bandar Baru Bangi, Bangi - Terrace House For Sale	Vacant	-1	-1	Intermediate Lot	1650	-1	-1	275.758	-1	-1	https://cdn.durianproperty.com.my/images/classified_ads/300458411718255.jpg
310000	977	2	Partly Furnished	3	Leasehold	2	REN No.: 2821	Kriss Yong	https://www.durianproperty.com.my/classified/3031373/Puteri-10-Condo-for-sale-by-Kriss-Yong	Tell Kriss Yong you saw this ad from DurianProperty to get best deal.PUCHONG LAKE VIEW CONDO You may view Puteri 10 Profile here.	2021-10-11	Puteri 10	Bandar Puteri Puchong	Durian	Condo	Puteri 10, Bandar Puteri Puchong - Condo For Sale	Vacant	-1	-1	Intermediate Lot	-1	-1	-1	-1	-1	-1	https://cdn.durianproperty.com.my/images/classified_ads/303137311909227.png
200000	1200	na	Partly Furnished	na	na	na	na	Lau3003	https://www.durianproperty.com.my/classified/3019743/Pandan-Indah-Shop-Office-for-sale-by-lau3003	Tell lau3003 you saw this ad from DurianProperty to get best deal.==> CALL LAU 0103669320 (registered real estate agent with MIEA with REN 06302) FOR MORE INFO/ VIEWING! ¥¥ Selling below SPA Price ¥¥ 1200sf shop office, Pandan Indah, Cheras 7 rooms 2 bathrooms $1300 (rental)You may view Pandan Indah Profile here.	2021-10-11	Pandan Indah	Kuala Lumpur	Durian	Shop Office	Pandan Indah, Kuala Lumpur - Shop Office For Sale	na	-1	-1	na	-1	-1	-1	-1	-1	-1	https://cdn.durianproperty.com.my/images/classified_ads/301974311825884.jpg
1500000	2890	5	Partly Furnished	5	Freehold	na	REN No.: 16990	Safuan Rahman	https://www.durianproperty.com.my/classified/3011663/BK6-Terrace-House-for-sale-by-Safuan-Rahman	Tell Safuan Rahman you saw this ad from DurianProperty to get best deal.Superlink 30’ x 70’ Double Storey, Melodi @ Bandar Kinrara for sale. Property details:- - Address:- Jalan BK 6E/4, Bandar Kinrara, 41780, Puchong - Gated & guarded area - Type- Superlink Double Storey Terrace House - Intermediate unit - Built up: approx. 2,890sqft - Land area: 30’ x 70’ @ approx 2,100sqft. - 4+ 1 Bedrooms - 5…	2021-10-11	BK6	Bandar Kinrara	Durian	Terrace House	BK6, Bandar Kinrara - Terrace House For Sale	na	-1	-1	na	-1	-1	-1	-1	-1	-1	https://cdn.durianproperty.com.my/images/classified_ads/301166311768089.jpg
415000	1100	2	Fully Furnished	3	Leasehold	1	REN No.: 03857	Seri Jumadil	https://www.durianproperty.com.my/classified/3050963/Taman-Puchong-Perdana-Terrace-House-for-sale-by-SERI-JUMADIL	Tell SERI JUMADIL you saw this ad from DurianProperty to get best deal.FOR SALE SINGLE STORY TAMAN PUCHONG PERDANA, PUCHONG PROPERTY DETAILS : =================== Single Storey House (Intermediate) Leasehold | Bumi lot Built Up: 1100 (Approximately) Land Size : 20 x 65 3 Bedrooms 2 Bathrooms 1 Garage / Covered Car Parking Renovated House : *Kitchen extended *Table top *Plaster ceiling living room…	2021-10-11	Taman Puchong Perdana	Puchong	Durian	Terrace House	Taman Puchong Perdana, Puchong - Terrace House For Sale	Tenanted	-1	-1	Intermediate Lot	1300	-1	-1	319.231	-1	-1	https://cdn.durianproperty.com.my/images/classified_ads/305096312044170.jpg
319000	807	2	Partly Furnished	3	Leasehold	1	na	Hasif Hartanah	https://www.durianproperty.com.my/classified/3020787/M3-Residency-Condo-for-sale-by-Hasif-Hartanah	Tell Hasif Hartanah you saw this ad from DurianProperty to get best deal.M3 Residency (above M3 Shopping Mall) ========================= ASKING PRICE: RM 319,000 ASKING PRICE: RM 319,000 ASKING PRICE: RM 319,000 ====================== HASIF 012-9396100 HASIF 012-9396100 HASIF 012-9396100 - Walking distance to Taman Melati LRT station (around 5 mins) - Walking distance to Tunku Abdul Rahman Colleg…	2021-10-11	M3 Residency	Gombak Setia	Durian	Condo	M3 Residency, Gombak Setia - Condo For Sale	Owner Occupied	-1	-1	Intermediate Lot	-1	-1	-1	-1	-1	-1	https://cdn.durianproperty.com.my/images/classified_ads/302078711833345.jpg
220000	1054	2	Partly Furnished	3	Freehold	1	REN No.: 17780	Muhammad Faridz Bin Ismail	https://www.durianproperty.com.my/classified/3008592/Taman-Topaz-Apartment-for-sale-by-muhammad-faridz-bin-ismail	Tell muhammad faridz bin ismail you saw this ad from DurianProperty to get best deal.FOR SALE: PANGSAPURI TOPAZ, DENGKIL, SELANGOR ===================== Asking Price : Rm220,000 ===================== PROPERTY DETAILS : Type : Apartment Freehold Size : 1054 sqft Bedroom 3 / Bathrooms 2 Level : 6 Parking : 1 Carpark Maintenance Fee : RM121 Tenanted FACILITIES : 24 hours Security Surau Multipurpose …	2021-10-11	Taman Topaz	Dengkil	Durian	Apartment	Taman Topaz, Dengkil - Apartment For Sale	na	-1	-1	na	-1	-1	-1	-1	-1	-1	https://cdn.durianproperty.com.my/images/classified_ads/300859211747708.jpg
1300000	5074	5	na	5	Freehold	na	REN No.: 00199	Syukor Karnaini	https://www.durianproperty.com.my/classified/3006688/Alam-Impian-Terrace-House-for-sale-by-Syukor-Karnaini	Tell Syukor Karnaini you saw this ad from DurianProperty to get best deal.FACING OPEN CORNER LOT Double Storey Terrace House Alam Impian Nukilan 2 -5 Bedroom& 5 Bathroom -Guarded 24 hours - Basic Unit -Facing Open -Built Up : 5,074 sqft -Land Area : 3,182 sqft ~ 7 mins to Bukit Rimau, Kota Kemuning, Jalan Kebun. ~ 15-20 mins to UITM Shah Alam, Stadium Shah Alam ~ 15-20 mins to USJ, Subang Jaya, P…	2021-10-11	Alam Impian	Shah Alam	Durian	Terrace House	Alam Impian, Shah Alam - Terrace House For Sale	na	-1	-1	Corner Lot	3182	-1	-1	408.548	-1	-1	https://cdn.durianproperty.com.my/images/classified_ads/300668811734249.jpg
450000	1785	5	na	4	Leasehold	na	REN No.: 37497	Hairul Hafiz Harun	https://www.durianproperty.com.my/classified/3007133/Seri-Pristana-Terrace-House-for-sale-by-Hairul-Hafiz-Harun	Tell Hairul Hafiz Harun you saw this ad from DurianProperty to get best deal.For Sale : 2 Storey Terrace, Seri Pristana (SP6), Saujana Utama, Sungai Buloh Details ====== + Leasehold + Non Bumi Lot + Land Area: 20x65 sqft + Built-Up: 1785 sqft + 4 Bedrooms & 3 Bathrooms + Basic Unit: Grills, Lightings, Ceiling Fans & Etc + Tenanted : RM900 . Amenities ======== + SK Seri Pristana, SK Saujana Utama,…	2021-10-11	Seri Pristana	Sungai Buloh	Durian	Terrace House	Seri Pristana, Sungai Buloh - Terrace House For Sale	Tenanted	-1	-1	Intermediate Lot	1300	-1	-1	346.154	-1	-1	https://cdn.durianproperty.com.my/images/classified_ads/300713311737286.jpg
525000	1250	2	Fully Furnished	3	Freehold	2	REN No.: 22441	Nah Ai Hong	https://www.durianproperty.com.my/classified/3010819/Meridien-Residence-Condo-for-sale-by-Nah-Ai-Hong	Tell Nah Ai Hong you saw this ad from DurianProperty to get best deal.Meridien Residence Renovated Fully Furnished Unit for Sales 1260 sqft - 3 bedroom - 2 bathroom - 2 car park - Renovated with kitchen cabinet, , gas stove, cooking hood - Fully furnished - Modern and contemporary - Cozy and Good ventilation - Move in condition - Located at Sungai Ara Neighboring with Orchard Ville, Reflection, S…	2021-10-11	Meridien Residence	Sungai Ara	Durian	Condo	Meridien Residence, Sungai Ara - Condo For Sale	Vacant	-1	-1	Intermediate Lot	-1	-1	-1	-1	-1	-1	https://cdn.durianproperty.com.my/images/classified_ads/301081911761629.jpg
1080000	2600	4	Unfurnished	5	Leasehold	4	REN No.: 01100	Andrew Lim	https://www.durianproperty.com.my/classified/3013130/Dale-Terrace-House-for-sale-by-Andrew-Lim	Tell Andrew Lim you saw this ad from DurianProperty to get best deal.dale lakefilds 3sty superlink for sale 20x81 build up 2600sf For more info please call : Andrew : 013-3789993 SUMHOUSE SDN BHD (HQ) (E(1)1478)Please see more of my listings at http://andrewlcs.myagent.my/.You may view Dale Profile here.	2021-10-11	Dale	Lake Fields	Durian	Terrace House	Dale, Lake Fields - Terrace House For Sale	Tenanted	-1	-1	Intermediate Lot	1600	-1	-1	675	-1	-1	https://cdn.durianproperty.com.my/images/classified_ads/301313011779866.JPG
550000	1400	3	Partly Furnished	4	Freehold	na	REN No.: 38742	Deeja Zakaria	https://www.durianproperty.com.my/classified/3019250/Saujana-Tropika-Terrace-House-for-sale-by-Deeja-Zakaria	Tell Deeja Zakaria you saw this ad from DurianProperty to get best deal.Double Storey Terrace House Taman Saujana Tropika Seremban 2 Asking Price : 550k (nego) ======================= - built up : 20x70 sqft - land area: 1400 sqft - Tenure : Freehold - Status : Bumi lot - Bedrooms : 4 - Bathrooms : 3 - wet kitchen and dry kitchen Facilities -gated and guarded - Hill park Amenities & Facilities - …	2021-10-11	Saujana Tropika	Seremban 2	Durian	Terrace House	Saujana Tropika, Seremban 2 - Terrace House For Sale	na	-1	-1	na	1400	-1	-1	392.857	-1	-1	https://cdn.durianproperty.com.my/images/classified_ads/301925011821771.jpeg
292000	952	2	Unfurnished	3	Leasehold	1	na	-1	https://www.durianproperty.com.my/classified/2998102/Bandar-Sierra-Apartment-for-sale-by-Alfred-Vun	Menggatal, New Unit : Bandar Sierra Apartment . - Block P - Level 2 - 952 sqft - 3 Bedrooms 2 Bathrooms - Intermediate - Empty - Non-Bumi lot - Rm292K . Facilities: Playground, Swimming Pool, Basketball Court, Landscape Garden, 24 hr Security. . Whatsapp for more info! k/iopy8d k/iopy8d k/iopy8d . Call/Whatsapp: 011-5858-0889 Facebook Page: kkmyproperty . REN13187 EMA AGENCY E(3)1578 . #kk #mengg…	2021-10-11	Bandar Sierra	Menggatal	Durian	Apartment	Bandar Sierra, Menggatal - Apartment For Sale	na	-1	-1	Intermediate Lot	-1	-1	-1	-1	-1	-1	https://cdn.durianproperty.com.my/images/classified_ads/299810211677617.jpg
250000	830	2	Unfurnished	3	Freehold	1	REN No.: 30069	Hafiz Nor Hamzah	https://www.durianproperty.com.my/classified/3028611/Pangsapuri-Wira-Apartment-for-sale-by-HAFIZ-NOR-HAMZAH	Tell HAFIZ NOR HAMZAH you saw this ad from DurianProperty to get best deal.PANGSAPURI WIRA, TAMAN TUN PERAK FOR SALE Sesuai untuk duduk sendiri atau pelaburan DETAILS: - Freehold - Open - 3 Rooms | 2 Bathrooms - 1 Parking Lot - Currently tenanted - Level 4 (walk-up) AMENITIES: - SKs & SMKs, Sek Ren Agama Tmn Tun Perak - Surau Al-Faizin - Family Clinics | Kelinik Kesihatan (KKM) Bdr Tun Hussien On…	2021-10-11	Pangsapuri Wira	Taman Tun Perak	Durian	Apartment	Pangsapuri Wira, Taman Tun Perak - Apartment For Sale	Tenanted	-1	-1	Intermediate Lot	-1	-1	-1	-1	-1	-1	https://cdn.durianproperty.com.my/images/classified_ads/302861111890248.jpg
370000	700	2	Unfurnished	3	Freehold	1	na	Mervyn Seah	https://www.durianproperty.com.my/classified/3036714/Taman-Jubilee-Apartment-for-sale-by-Mervyn-Seah	Tell Mervyn Seah you saw this ad from DurianProperty to get best deal.## BEST DEAL IN SUNGAI DUA ## BUY BELOW BANK VALUE ## TAMAN JUBILEE BLOCK 11 ## GROUND FLOOR / 底樓 ## CORNER UNIT / 角間單位 ## BUILT UP 700 SQFT / 室內面積 700 方呎 ## 3 BED ROOM / 3 臥房 ## 2 BATH ROOM / 2 浴室 ## WELL MAINTAIN /好保養 ## FULLY RENOVATION UNIT / 全裝修單位 ## RARE IN MARKET / 市場少有 ## DON'T MISS THE OPPORTUNITY 不要错过机会 ## IF YOU ARE …	2021-10-11	Taman Jubilee	Sungai Dua	Durian	Apartment	Taman Jubilee, Sungai Dua - Apartment For Sale	na	-1	-1	Corner Lot	-1	-1	-1	-1	-1	-1	https://cdn.durianproperty.com.my/images/classified_ads/303671411943080.jpg
260000	980	2	Partly Furnished	3	Leasehold	1	na	Felixia Wong	https://www.durianproperty.com.my/classified/3010310/D-casa-Condominium-Condo-for-sale-by-Felixia-Wong	Tell Felixia Wong you saw this ad from DurianProperty to get best deal.D'casa Condominium, Ampang For Sale Address: Jalan Wawasan 1/10, Taman Sri Watan, 68000 Ampang, Selangor Dear Tenants and Buyers : One Stop Service, Save Your Time and Energy . Just call me and let me know your requirements, I can arrange multiple units for your viewing, no need to call and deal with multiple agents. **Due to …	2021-10-11	D'casa Condominium	Ampang	Durian	Condo	D'casa Condominium, Ampang - Condo For Sale	na	-1	-1	na	-1	-1	-1	-1	-1	-1	https://cdn.durianproperty.com.my/images/classified_ads/301031011758427.jpeg
1000000	1670	2	Partly Furnished	3	Freehold	2	REN No.: 10018	Dacklin31	https://www.durianproperty.com.my/classified/3019768/Inwood-Residences-Condo-for-sale-by-dacklin31	Tell dacklin31 you saw this ad from DurianProperty to get best deal.Below MArket Brand new View to appreciate We provided one stop service of your financial needs: 1. Bank loan solution 2. Panel lawyer arrangement 3. Free bank valuation Owners very welcome to call / sms / email whatsapp / email if any properties for sale / rent -For More information pls Contact Or Whatsapp -Dacklin 016 9384134 -E…	2021-10-11	Inwood Residences	Bukit Kerinchi	Durian	Condo	Inwood Residences, Bukit Kerinchi - Condo For Sale	na	-1	-1	na	-1	-1	-1	-1	-1	-1	https://cdn.durianproperty.com.my/images/classified_ads/301976811826085.jpeg
21210000	23576	5	Unfurnished	4 + 4	Freehold	na	REN No.: 13516	Lee Chin (Ren13516)	https://www.durianproperty.com.my/classified/3018730/Taman-U-Thant-Bungalow-House-for-sale-by-Lee-Chin-REN13516-	Tell Lee Chin (REN13516) you saw this ad from DurianProperty to get best deal.* Taman U Thant, Ampang Hilir (Embassy Row) * 1.5 Storey Bungalow House Located At Taman U Thant For Sale * Freehold * Corner * Huge land 23,576sf (0.5 acre) * Excellent piece of land, strategic location * Surrounded by embassies and high end residential condominiums and developments *** RM900psf *** Please contact Lee …	2021-10-11	Taman U-Thant	Ampang Hilir	Durian	Bungalow House	Taman U-Thant, Ampang Hilir - Bungalow House For Sale	Vacant	-1	-1	Corner Lot	-1	-1	-1	-1	-1	-1	https://cdn.durianproperty.com.my/images/classified_ads/301873011817842.jpg
399000	2756	4	Unfurnished	4	Freehold	3	na	Jk Ng	https://www.durianproperty.com.my/classified/3013395/USJ-Superlink-for-sale-by-JK-NG	Tell JK NG you saw this ad from DurianProperty to get best deal.Special Promo Package: - Free WIFI - Free SNP Legal & Stamp Duty Fees - Free Loan Agreement & Stamp Duty Fees - Free MOT - Free Guard House Fees - Free Club house accessibility including, Swimming Pool, fully equipped gymnasium, Tennis court, Badminton court, conference hall, Spa, Jacuzzi & 20+facilities Easy Accessibility: *5 min to…	2021-10-11	USJ	Subang Jaya	Durian	Superlink	USJ, Subang Jaya - Superlink For Sale	na	-1	-1	na	1540	-1	-1	259.091	-1	-1	https://cdn.durianproperty.com.my/images/classified_ads/301339511781854.jpg
568000	1116	2	Unfurnished	3	na	2	na	Lisa	https://www.durianproperty.com.my/classified/3031107/Orchard-Ville-Condo-for-sale-by-LISA	Tell LISA you saw this ad from DurianProperty to get best deal.Orchard Ville Located in Off Persiaran Kelicap, Bayan Lepas, 11900, Penang Building Details: Bedrooms: 3 Bathrooms: 2 Built-Up: 1116 sq. ft. Condition : Original Unit & Unfurnished Car park : 2 Car park Facilities: Badminton hall , Basketball court , Barbeque Area ,Game room , Gymnasium room , Jacuzzi , Lap pool ,Landscaped Garden ,Mu…	2021-10-11	Orchard Ville	Sungai Ara	Durian	Condo	Orchard Ville, Sungai Ara - Condo For Sale	Vacant	-1	-1	Corner Lot	-1	-1	-1	-1	-1	-1	https://cdn.durianproperty.com.my/images/classified_ads/303110711907326.jpg
430000	920	2	Partly Furnished	3	Freehold	1	na	Sia Yiik Luk	https://www.durianproperty.com.my/classified/3044394/Angkasa-Condominiums-Condo-for-sale-by-Sia-Yiik-Luk	Tell Sia Yiik Luk you saw this ad from DurianProperty to get best deal.Angkasa Condominiums, Cheras. >3-bedroom W 2-bathroom >920 sf each unit. >tenanted especially to the UCSI students. >neighbors Giant Hypermarket Taman Connaught & University College International Sedaya. >It enjoys the nearest distance to University College International Sedaya. >Other from UCSI, there are a few school located…	2021-10-11	Angkasa Condominiums	Cheras	Durian	Condo	Angkasa Condominiums, Cheras - Condo For Sale	Tenanted	-1	-1	Intermediate Lot	-1	-1	-1	-1	-1	-1	https://cdn.durianproperty.com.my/images/classified_ads/304439411999764.jpg
425000	1500	2	Partly Furnished	4	Freehold	na	REN No.: 38522	Muhammad Ezwan	https://www.durianproperty.com.my/classified/3006629/Sri-Suajaya-Condominium-Condo-for-sale-by-Muhammad-Ezwan	Tell Muhammad Ezwan you saw this ad from DurianProperty to get best deal.WTS : FREEHOLD SRI SUAJAYA CONDO DUPLEX UNIT| SENTUL !!! Booking flexible !!! ================= ASKING PRICE : RM 425 000 (NEGO) ================= !!! Booking flexible!!! DETAILS: - Type : Condo - Status: Bumi Lot - Title: Freehold - Built - up size: 1500 sq. ft. - Bedroom: 4 - Bathroom: 2 - Car Park: 1 - Move-in Condition -…	2021-10-11	Sri Suajaya Condominium	Sentul	Durian	Condo	Sri Suajaya Condominium, Sentul - Condo For Sale	na	-1	-1	na	-1	-1	-1	-1	-1	-1	https://cdn.durianproperty.com.my/images/classified_ads/300662911733818.jpg
428000	1540	2	Unfurnished	3	Freehold	2	REN No.: 29330	Jason Tan	https://www.durianproperty.com.my/classified/3029317/Taman-Ungku-Tun-Aminah-Terrace-House-for-sale-by-Jason-Tan	Tell Jason Tan you saw this ad from DurianProperty to get best deal.#You may view Taman Ungku Tun Aminah Profile here.	2021-10-11	Taman Ungku Tun Aminah	Skudai	Durian	Terrace House	Taman Ungku Tun Aminah, Skudai - Terrace House For Sale	na	-1	South-West	na	1540	-1	-1	277.922	-1	-1	https://cdn.durianproperty.com.my/images/classified_ads/302931711894997.jpg
250000	700	2	Fully Furnished	2	Freehold	1	na	Elyntan	https://www.durianproperty.com.my/classified/3048968/Prima-Setapak-I-Condo-for-sale-by-ElynTan	Tell ElynTan you saw this ad from DurianProperty to get best deal.Below 30% Market Price New Township Investment AirBnB Luxury 5star Condo @ Tourist Hotspot We Help Rent, We Help Manage, We Help You Earn! .- Price from RM250k, Monthly Installment: RM1100 .- We Help You Rent: RM2200 .- After 5 Years Earn More RM150K CMCO Limited Promo ** 0% Downpayment ** FREE ALL Legal + Disbursement Fees + MOT (…	2021-10-11	Prima Setapak I	Setapak	Durian	Condo	Prima Setapak I, Setapak - Condo For Sale	na	-1	-1	na	-1	-1	-1	-1	-1	-1	https://cdn.durianproperty.com.my/images/classified_ads/304896812029916.jpg
480000	1200	1	Partly Furnished	3	Leasehold	na	na	Mufirasbullah	https://www.durianproperty.com.my/classified/3041618/Taman-Puchong-Impian-Terrace-House-for-sale-by-mufirasbullah	Tell mufirasbullah you saw this ad from DurianProperty to get best deal.CORNER LOT 1- STOREY TERRACE, TAMAN PUTRA,PUCHONG ===================== ASKING PRICE : 480K NEGOTIABLE Contact : 016-7150582 ===================== PROPERTY DETAILS: - Single storey terrace - Corner lot - Built-up 1200 sqft - Land area: 2464 sqft - End of the Road, not busy with other vehicle - Status: Leasehold / Nonbumi Lot …	2021-10-11	Taman Puchong Impian	Puchong	Durian	Terrace House	Taman Puchong Impian, Puchong - Terrace House For Sale	na	-1	-1	na	2464	-1	-1	194.805	-1	-1	https://cdn.durianproperty.com.my/images/classified_ads/304161811978007.jpeg
900000	2212	4	Unfurnished	4	Freehold	1	na	Ahmad Kamal Syauki Bin Ahmad Rashidi	https://www.durianproperty.com.my/classified/3048447/Denai-Alam-Terrace-House-for-sale-by-Ahmad-Kamal-Syauki-Bin-Ahmad-Rashidi	Tell Ahmad Kamal Syauki Bin Ahmad Rashidi you saw this ad from DurianProperty to get best deal.Ferrea Elmina Denai Alam PROPERTY DETAILS: Built up: 2212 sq ft Level: 2 storey Rooms: 4 Bathroom: 4 Leasehold/Freehold: Freehold Title: Bumi lot Facilities: 1. Gated and guarded 2. Playground - 3.18% Booking Fee, 6.82% Balance Deposit upon Signing SPA - Bankers & Lawyers can be arranged - Can try for 1…	2021-10-11	Denai Alam	Shah Alam	Durian	Terrace House	Denai Alam, Shah Alam - Terrace House For Sale	na	-1	-1	na	2212	-1	-1	406.872	-1	-1	https://cdn.durianproperty.com.my/images/classified_ads/304844712025770.jpg
250000	914	2	na	3	Freehold	2	REN No.: 28281	Fadzilah	https://www.durianproperty.com.my/classified/3010944/Tiara-East-Apartment-for-sale-by-fadzilah	Tell fadzilah you saw this ad from DurianProperty to get best deal.914Sf Freehold Furnish The Residence 2 Tiara East Semenyih Asking Price : Rm250000 Property Details: - 3 Bedroom 2 Bathroom - 914sf - Freehold - Semi Furnished - Kitchen Cabinet - 2 Car Park - Renovated Unit Tiara East Facilities & Amenities - Barbeque Area - Game room - Gymnasium room - Multi-purpose hall - Playground - 24 hours …	2021-10-11	Tiara East	Semenyih	Durian	Apartment	Tiara East, Semenyih - Apartment For Sale	na	-1	-1	na	-1	-1	-1	-1	-1	-1	https://cdn.durianproperty.com.my/images/classified_ads/301094411762463.jpeg
370000	980	2	Fully Furnished	3	Leasehold	1	na	Jimmy Koh	https://www.durianproperty.com.my/classified/3013430/Endah-Promenade-Condo-for-sale-by-Jimmy-Koh	Tell Jimmy Koh you saw this ad from DurianProperty to get best deal.LOOKING FOR SERIOUS BUYER, BELOW MARKET PRICE - CAN APPLY FULL LOAN ! - BANK LOAN CAN BE ARRANGE FOR YOU ! - WE HAVE STRONG PANEL BANKER & LAWYER ! - FIRST HOME BUYER GET HIGH DISCOUNT ON LEGAL FEES !!! Good For Investment Or Own Stay !!! Great Strategic Location !!! BELOW MARKET !!! Fast Grab it before late !!! LIMITED UNIT !!! …	2021-10-11	Endah Promenade	Sri Petaling	Durian	Condo	Endah Promenade, Sri Petaling - Condo For Sale	na	-1	-1	na	-1	-1	-1	-1	-1	-1	https://cdn.durianproperty.com.my/images/classified_ads/301343011782013.jpg
550000	1400	3	Partly Furnished	4	Leasehold	na	REN No.: 21735	Shafiq Rahman	https://www.durianproperty.com.my/classified/3038489/Taman-Lestari-Perdana-Terrace-House-for-sale-by-Shafiq-Rahman	Tell Shafiq Rahman you saw this ad from DurianProperty to get best deal.FOR SALE: 2 Storey Terrace House, LP 8, Taman Lestari Perdana, Seri Kembangan . KITCHEN EXTENDED. SPACIOUS KITCHEN. . DETAILS: - Leasehold - Bumi lot - Land area: 20' x 70' (1,400 sq. ft.). - 4 bedrooms. - 3 bathrooms. - Extended at the back upstairs and downstairs. - Complete with kitchen cabinet and table top. - Built-in wa…	2021-10-11	Taman Lestari Perdana	Seri Kembangan	Durian	Terrace House	Taman Lestari Perdana, Seri Kembangan - Terrace House For Sale	Tenanted	-1	-1	Intermediate Lot	1400	-1	-1	392.857	-1	-1	https://cdn.durianproperty.com.my/images/classified_ads/303848911956241.jpg
248000	1300	3	na	4	Freehold	na	REN No.: 28053	Fadzli	https://www.durianproperty.com.my/classified/3001102/Pangsapuri-Miro-Apartment-for-sale-by-fadzli	Tell fadzli you saw this ad from DurianProperty to get best deal.FADZLI FADZLI FADZLI GS REALTY SDN BHD [FREEHOLD!!!!] MUST VIEW MIRO APARTMENT KAJANG ASKING PRICE: RM248,000 DETAILS ======= - Freehold - Bumi Lot - Master title - 4 bedroom 3 bathroom - 1300sqf - 3rd floor with lift - 1 provide carpark FACILITIES ========== - play ground - well maintained AMENITIES ========= - 0.50m Mini market - …	2021-10-11	Pangsapuri Miro	Taman Kajang Putra	Durian	Apartment	Pangsapuri Miro, Taman Kajang Putra - Apartment For Sale	na	-1	-1	na	-1	-1	-1	-1	-1	-1	https://cdn.durianproperty.com.my/images/classified_ads/300110211695050.jpg
410000	1400	3	Partly Furnished	4	Leasehold	2	na	Azie Amylia	https://www.durianproperty.com.my/classified/3027349/Taman-Lestari-Putra-Terrace-House-for-sale-by-Azie-Amylia	Tell Azie Amylia you saw this ad from DurianProperty to get best deal.RM 410,000 (Negotiable) # 4 bilik 3 bilik air # 20' x 70' # Leasehold # Bumi Lot # Individual Title # Basic Unit AMENITIES: #Giant #Sekolah Kebangsaan Taman Desaminium #Surau Al-Mustaqim #Pasar Borong Selangor, Seri Kembangan #Petronas Equine 1 & 2 #Caltex Lestari Perdana #AEON Taman Equine ACCESSIBILITY: - SKVE Highway - MEX H…	2021-10-11	Taman Lestari Putra	Bandar Putra Permai	Durian	Terrace House	Taman Lestari Putra, Bandar Putra Permai - Terrace House For Sale	na	-1	-1	na	1400	-1	-1	292.857	-1	-1	https://cdn.durianproperty.com.my/images/classified_ads/302734911881637.jpg
388000	925	2	Partly Furnished	3	Leasehold	1	na	Warisanzulaikha	https://www.durianproperty.com.my/classified/3039989/M3-Residency-Condo-for-sale-by-warisanzulaikha	Tell warisanzulaikha you saw this ad from DurianProperty to get best deal.Facilities : ====== 1. Cafeteria 2. Jogging track 3. Picnic area with tables 4. Barbecue area 5. Infinity pool 6. Pool deck 7. Playground 8. Gymnasium 9. Multipurpose court 10. Community hall. 11. Library 12. Surau 13. Sauna Amenities : ======= 1. M3 Mall 2. Setapak Central 3. TARC College 4. Columbia Hospital Kuala Lumpur …	2021-10-11	M3 Residency	Gombak Setia	Durian	Condo	M3 Residency, Gombak Setia - Condo For Sale	Tenanted	-1	-1	Intermediate Lot	-1	-1	-1	-1	-1	-1	https://cdn.durianproperty.com.my/images/classified_ads/303998911965637.jpeg
558000	1800	3	Unfurnished	4	Leasehold	1	REN No.: 01842	Zureeproperties	https://www.durianproperty.com.my/classified/3012466/Seri-Pristana-Terrace-House-for-sale-by-Zureeproperties	Tell Zureeproperties you saw this ad from DurianProperty to get best deal.2 Storey Semi-D Seri Pristana Sg Buloh DETAILS: + Leasehold / Bumilot + Built-Up 1800 sqft + 4 Room 3 Bathroom NECESSITIES: + SK Pristana, SK Saujana Utama, SMK Saujana Utama + UiTM Puncak Alam + Masjid An-Nur, Surau Al-Makmuriah + KFC, Pizza Hut, Dominos, Secret Recipe + Bank Islam, BSN and Bank Rakyat + Petronas, Shell + …	2021-10-11	Seri Pristana	Sungai Buloh	Durian	Terrace House	Seri Pristana, Sungai Buloh - Terrace House For Sale	na	-1	-1	na	1800	-1	-1	310	-1	-1	https://cdn.durianproperty.com.my/images/classified_ads/301246611774032.jpeg
429000	1600	3	Unfurnished	4	Leasehold	2	REN No.: 016730	Saiful Nizam Jalal	https://www.durianproperty.com.my/classified/3008116/Section-4-Terrace-House-for-sale-by-saiful-nizam-jalal	Tell saiful nizam jalal you saw this ad from DurianProperty to get best deal.Seksyen 4 Bandar Baru Bangi Double Storey Terrace. Facing padang Seksyen 4 Bandar Baru Bangi Property Details : Type : Double Storey Terrace Unit : Intermediate (special intermediate) Tenure : Leasehold Status : Bumi Lot Land Area : 20 x 80 (1600 sq. ft.) 4 Bedrooms & 3 Bathrooms Nearby : SMK Jalan 4, Bandar Baru Bangi S…	2021-10-11	Section 4	Bandar Baru Bangi	Durian	Terrace House	Section 4, Bandar Baru Bangi - Terrace House For Sale	Vacant	-1	-1	Intermediate Lot	1600	-1	-1	268.125	-1	-1	https://cdn.durianproperty.com.my/images/classified_ads/300811611744709.jpg
600000	2000	3	Unfurnished	4 + 1	Freehold	1	na	Mohd Faizal Ab Jamal	https://www.durianproperty.com.my/classified/3029589/Section-3-Terrace-House-for-sale-by-Mohd-Faizal-Ab-Jamal	Tell Mohd Faizal Ab Jamal you saw this ad from DurianProperty to get best deal.FULLY RENOVATED DOUBLE STOREY SEKSYEN 3 BANDAR MAHKOTA CHERAS Asking Price: RM700,000 (NEGO) Location: Jalan Pahlawan Bandar Mahkota Cheras, Cheras FULLY RENOVATED Property Descriptions: Property Type: 2 Storey House Tenure: Freehold, Bumi Lot Title: Individual Title Granted Land Area: 2050 sqft Build Up: 20\" x 65\" B…	2021-10-11	Section 3	Bandar Mahkota Cheras	Durian	Terrace House	Section 3, Bandar Mahkota Cheras - Terrace House For Sale	Owner Occupied	-1	-1	Intermediate Lot	1300	-1	-1	461.538	-1	-1	https://cdn.durianproperty.com.my/images/classified_ads/302958911897008.jpg
1150000	3950	5	Unfurnished	5 + 1	Freehold	4	REN No.: 11112	Muhammad Azrin	https://www.durianproperty.com.my/classified/3030897/Taman-Chi-Liung-Semi-D-for-sale-by-Muhammad-Azrin	Tell Muhammad Azrin you saw this ad from DurianProperty to get best deal.==== 2.5 STY SEMI-D FOR SALE @ TAMAN CHI LIUNG, KLANG ==== PROPERTY DETAILS : ~ FREEHOLD ~ NON BUMI LOT ~ L/A : 3,000 SQFT ~ B/U : 3,950 SQFT ~ 5+ ROOMS, 5 BATHROOMS ~ FULLY RENOVATED ~ NEWLY BUILT ~ SELLING BELOW BANK VALUATION ASKING PRICE : RM 1,150,000 * OWNER ARE WELCOME TO LIST * ** VIEW TO APPRECIATE IT ** FEEL FREE T…	2021-10-11	Taman Chi Liung	Klang	Durian	Semi D	Taman Chi Liung, Klang - Semi D For Sale	Vacant	-1	-1	Intermediate Lot	3000	-1	-1	383.333	-1	-1	https://cdn.durianproperty.com.my/images/classified_ads/303089711905872.jpg
650000	1395	3	Partly Furnished	3	Freehold	na	na	Siew Kam Mun	https://www.durianproperty.com.my/classified/3025960/Damansara-Foresta-Condo-for-sale-by-siew-kam-mun	Tell siew kam mun you saw this ad from DurianProperty to get best deal.Raymond @ 017 - 777 3375 (Watsapp 24hrs on) Raymond @ 017 - 777 3375 (Watsapp 24hrs on) *** Damansara Foresta For sale *** Location : Damanasara Foresta (City View unit) Type: For Sale Unit Size: 1395sq ft Furnished: Furnished Kitchen cabinet only as in the photos Bedrooms: 3 Bathrooms : 3 Car park : 2 ** Only at RM 650,000 ( …	2021-10-11	Damansara Foresta	Bandar Sri Damansara	Durian	Condo	Damansara Foresta, Bandar Sri Damansara - Condo For Sale	na	-1	-1	na	-1	-1	-1	-1	-1	-1	https://cdn.durianproperty.com.my/images/classified_ads/302596011872526.jpg
290000	1350	3	Fully Furnished	4	Freehold	na	REN No.: 17767	Faizal Halimatun	https://www.durianproperty.com.my/classified/3048356/Bandar-Mahkota-Banting-Terrace-House-for-sale-by-Faizal-Halimatun	Tell Faizal Halimatun you saw this ad from DurianProperty to get best deal.DOUBLE STOREY, BANDAR MAHKOTA ,BANTING ================================ Asking price : RM290K Slightly nego Detail : - Freehold - Land Area :18x60 (1087 sqft) - Builtup area :1350 sqft - 4 Bedrooms - 3 Bathrooms - Basic unit *** INDIVIDUAL TITTLE READY *** AMENITIES :- 1km ke SK Olak Lempit & SRA Olak Lempit 1.5 km ke SMK …	2021-10-11	Bandar Mahkota Banting	Banting	Durian	Terrace House	Bandar Mahkota Banting, Banting - Terrace House For Sale	Tenanted	-1	-1	Intermediate Lot	1080	-1	-1	268.519	-1	-1	https://cdn.durianproperty.com.my/images/classified_ads/304835612025000.jpg
525000	1300	3	Fully Furnished	3	Freehold	3	REN No.: 25079	Welnis Lim	https://www.durianproperty.com.my/classified/3011180/Pandan-Indah-Condo-for-sale-by-Welnis-Lim	Tell Welnis Lim you saw this ad from DurianProperty to get best deal.CHERAS AMPANG Condo PROPERTY DETAILS ================= Bedrooms: 3 Bathrooms: 3 Parking: 2-3 Parking Bays Size: 1200sqft - 1400sqft Facilities: More than 30 Facilities Low density: ONLY 10 UNITS PER FLOOR ** FULL KLCC View ** FULL LOAN ** 0% Down-Payment ** 6 Star Facilities ** High Rebate & Cashback ** LOW Entry to own House **…	2021-10-11	Pandan Indah	Pandan	Durian	Condo	Pandan Indah, Pandan - Condo For Sale	Vacant	-1	-1	Corner Lot	-1	-1	-1	-1	-1	-1	https://cdn.durianproperty.com.my/images/classified_ads/301118011764385.jpg
450000	1540	3	Partly Furnished	4	Freehold	na	na	Chin Sook Kian	https://www.durianproperty.com.my/classified/3041336/Halaman-Meru-Permai-Terrace-House-for-sale-by-chin-sook-kian	Tell chin sook kian you saw this ad from DurianProperty to get best deal.Double storey terrace house for sale freehold 22x70 sqft 4bedrooms 3 bathrooms bigl living room and dinning room kitchen fully extend 4 aircond / fan / light/ fully tiled flloor up and down stairs /auto gate / grilled door/ grilled window very good condition for more information please contact Amy Chin 016-5157700You may vie…	2021-10-11	Halaman Meru Permai	Ipoh	Durian	Terrace House	Halaman Meru Permai, Ipoh - Terrace House For Sale	Vacant	-1	-1	Intermediate Lot	1540	-1	-1	292.208	-1	-1	https://cdn.durianproperty.com.my/images/classified_ads/304133611975629.jpg
255000	1350	1	Partly Furnished	3	Freehold	na	REN No.: 10143	Josephyap	https://www.durianproperty.com.my/classified/3026498/Taman-Teratai-Terrace-House-for-sale-by-JosephYap	Tell JosephYap you saw this ad from DurianProperty to get best deal.Taman Teratai @Skudai For SALE Near UTM 1 Storey low cost 3 rooms 1 bathroom 18x75 Low cost house Newly renovated paint doors Gate Extended behind Asking price RM255k * (Please Call before Arrangement for viewing) * For more info Kindly call or JOSEPH YAP 016-756 0078 / 016-7117 981 (REN 10143) - Welcome all Buying, Selling, Lett…	2021-10-11	Taman Teratai	Skudai	Durian	Terrace House	Taman Teratai, Skudai - Terrace House For Sale	Vacant	-1	-1	Intermediate Lot	-1	-1	-1	-1	-1	-1	https://cdn.durianproperty.com.my/images/classified_ads/302649811875979.jpeg
297000	850	2	na	3	Freehold	na	na	Crystal Khor	https://www.durianproperty.com.my/classified/3004189/Quinton-Apartment-for-sale-by-Crystal-Khor	Tell Crystal Khor you saw this ad from DurianProperty to get best deal.* New Project * Located at Balik Pulau 1.4 km to Hospital Balik Pulau 1.8 km to SJK(C) Sacred Heart 2.4 km to Balik Pulau Food Court * Only Affordable Project in Balik Pulau with Full Facilities * 1. Infinity pool & kids pool 2. Picnic Area 3. Sky Lounge 4. Basketball Court 5. Games Room 6. Yoga Deck 7. Outdoor and indoor Gym …	2021-10-11	Quinton	Balik Pulau	Durian	Apartment	Quinton, Balik Pulau - Apartment For Sale	na	-1	-1	na	-1	-1	-1	-1	-1	-1	https://cdn.durianproperty.com.my/images/classified_ads/300418911715502.jpg
520000	2016	3	Unfurnished	4	Freehold	na	na	Kelvin Chop	https://www.durianproperty.com.my/classified/3004545/Taman-Pelangi-Terrace-House-for-sale-by-Kelvin-Chop	Tell Kelvin Chop you saw this ad from DurianProperty to get best deal.DOUBLE STOREY TERRACED HOUSE FOR SALE * Taman Pelangi @ Jalan Ungu * 4 Bedrooms & 3 Bathrooms * Land Area 24 X 84 * Freehold * International Lot * Facing Northeast * No Co broke For This Unit * Owner listing are welcome. We will help you marketing your property and provide professional advice on current market trend. If you\'re…	2021-10-11	Taman Pelangi	Johor Bahru	Durian	Terrace House	Taman Pelangi, Johor Bahru - Terrace House For Sale	na	-1	-1	Intermediate Lot	-1	-1	-1	-1	-1	-1	https://cdn.durianproperty.com.my/images/classified_ads/300454511717871.jpg
360000	2443	2	Unfurnished	3	Freehold	na	REN No.: 35542	Npc Hartanah	https://www.durianproperty.com.my/classified/3023137/Taman-Jawi-Jaya-Semi-D-for-sale-by-NPC-Hartanah	Tell NPC Hartanah you saw this ad from DurianProperty to get best deal.Taman Jawi Jaya 2443 sqft Freehold Non-Bumi Lot 3 Bilik /2 Bilik air / Parking luas (Ada Awning) Kitchen Cabinet Table Top Fully Tiles Ada Tanah Tepi & Belakang Fully Furnished termasuk air-cond, perabot, katil, water heater dll seperti dlm gmbar.. Kawasan Berhampiran: Sekolah Rendah Jawi & Menengah Jawi Stesen Minyak BHP & Pe…	2021-10-11	Taman Jawi Jaya	Sungai Jawi	Durian	Semi D	Taman Jawi Jaya, Sungai Jawi - Semi D For Sale	na	-1	-1	na	2443	-1	-1	147.36	-1	-1	https://cdn.durianproperty.com.my/images/classified_ads/302313711850985.jpeg
240000	900	2	Partly Furnished	3	Freehold	na	na	Mufirasbullah	https://www.durianproperty.com.my/classified/3025453/Mantin-Industrial-Park-Terrace-House-for-sale-by-mufirasbullah	Tell mufirasbullah you saw this ad from DurianProperty to get best deal.PROPERTY DETAILS: - Type : single storey terrace - Endlot unit - Status: Freehold - Land area: 22x70 sqft - Bedroom: 3 - Bathroom: 2 - Mix areas between malay, chinese, indian - Basic unit NEARBY: - Pajam - Semenyih - Nilai - Pasaraya ZEE Mart - Near school Sk, Smk, Sjkc =========================== PRICE: RM240,000 ==========…	2021-10-11	Mantin Industrial Park	Mantin	Durian	Terrace House	Mantin Industrial Park, Mantin - Terrace House For Sale	Tenanted	-1	-1	End Lot	1539	-1	-1	155.945	-1	-1	https://cdn.durianproperty.com.my/images/classified_ads/302545311868801.jpg
3800000	8654	5+	Partly Furnished	8	Leasehold	2	REN No.: 31231	Monaliza	https://www.durianproperty.com.my/classified/3017884/Kayangan-Heights-Bungalow-House-for-sale-by-monaliza	Tell monaliza you saw this ad from DurianProperty to get best deal.⚜4 Storey Bungalow⚜ Kayangan Heights Shah Alam ------------------------- You may view Kayangan Heights Profile here.	2021-10-11	Kayangan Heights	Shah Alam	Durian	Bungalow House	Kayangan Heights, Shah Alam - Bungalow House For Sale	Vacant	-1	-1	Intermediate Lot	15510	-1	-1	245.003	-1	-1	https://cdn.durianproperty.com.my/images/classified_ads/301788411811412.jpg
360000	1190	2	Partly Furnished	3	Leasehold	1	na	Yazzer86	https://www.durianproperty.com.my/classified/3008885/Ridzuan-Condominium-Condo-for-sale-by-yazzer86	Tell yazzer86 you saw this ad from DurianProperty to get best deal.Property For Sale Ridzuan condominium, Jalan PJS10/11, 46000 Petaling Jaya, Selangor RM 360,000 Level 23, Block A, 1190 SF, 3 beds 2 baths level 23 and 24) Leasehold Non Bumi Lot Maintenance + sinking fund = RM 250 Two bathrooms have refurbished with modern tiles and Johnson suisse WC as shown in the pictures Floor to ceiling big …	2021-10-11	Ridzuan Condominium	Bandar Sunway	Durian	Condo	Ridzuan Condominium, Bandar Sunway - Condo For Sale	Vacant	-1	-1	na	-1	-1	-1	-1	-1	-1	https://cdn.durianproperty.com.my/images/classified_ads/300888511748188.jpg
110000	570	1	Unfurnished	2	Leasehold	1	na	Steven Yuen	https://www.durianproperty.com.my/classified/3036987/Taman-Cheras-Awana-Apartment-for-sale-by-Steven-Yuen	Tell Steven Yuen you saw this ad from DurianProperty to get best deal.STEVEN 018-232 2129 STEVEN 018-232 2129 STEVEN 018-232 2129 >Well kept >Below market price >High rental return >Near amenities area >Easy access *** This property is arguably one of the best in its range a MUST view *** * Good Property for Own Stay / Investment . * easy access near to town . * Photo is just for a DISPLAY to pro…	2021-10-11	Taman Cheras Awana	Cheras	Durian	Apartment	Taman Cheras Awana, Cheras - Apartment For Sale	na	-1	-1	na	-1	-1	-1	-1	-1	-1	https://cdn.durianproperty.com.my/images/classified_ads/303698711945366.jpg
370000	1163	3	Unfurnished	3	Freehold	2	na	-1	https://www.durianproperty.com.my/classified/3040648/Nido-Gardens-Terrace-House-for-sale-by-ppc-glomac	Tell ppc glomac you saw this ad from DurianProperty to get best deal.************** PROPERTY DETAILS. ************** Type A (Lower Unit) Kundang, Rawang New Development 22 X 70 2 Car Parks 3 Rooms, 3 Toilets, 1 Hall, 1 Pantry Freehold ************** Type B (Upper Unit) Kundang, Rawang New Development 22 X 70 2 Car Parks 3 Rooms, 3 Toilets, 1 Hall, 1 Pantry 1 Balcony, 1 Yard Freehold *************…	2021-10-11	Nido Gardens	Rawang	Durian	Terrace House	Nido Gardens, Rawang - Terrace House For Sale	Vacant	-1	East	na	1540	-1	-1	240.26	-1	-1	https://cdn.durianproperty.com.my/images/classified_ads/304064811970269.png
65000	689	2	na	3	Freehold	1	REN No.: 39781	Muz Hafiz	https://www.durianproperty.com.my/classified/3041327/Taman-Warisan-Flat-Apartment-for-sale-by-Muz-Hafiz	Tell Muz Hafiz you saw this ad from DurianProperty to get best deal.RUMAH UNTUK DILELONG AUC/MSS/1238 APARTMENT UNIT NO. B-1-12, BLOCK B, JALAN WARISAN, TAMAN WARISAN, 84000, MUAR, JOHOR ----------------------------------------- HARGA LELONGAN : RM 65,000 HARGA TRANSAKSI TERKINI : RM 130,000 - RM 150,000 TARIKH LELONGAN : 02-Aug-2021 ---------------------------------------- DETAILS: - Type: APART…	2021-10-11	Taman Warisan Flat	Muar	Durian	Apartment	Taman Warisan Flat, Muar - Apartment For Sale	na	-1	-1	na	-1	-1	-1	-1	-1	-1	https://cdn.durianproperty.com.my/images/classified_ads/304132711975505.png
415000	2071	3	Unfurnished	4	Freehold	na	REN No.: 32928	Ms. Yasmin	https://www.durianproperty.com.my/classified/3048098/Tiara-Sendayan-Terrace-House-for-sale-by-Ms-Yasmin	Tell Ms. Yasmin you saw this ad from DurianProperty to get best deal.DOUBLE STOREY TERRACE TIARA SENDAYAN FASA 2 (Beliza) NEGERI SEMBILAN . . DETAILS 2071sqft Land Area 20x65 Freehold Bumi Lot 4 bedrooms, 3 bathrooms 1 store room Completed Sept 2020 . AMENITIES 5 mins schools & commercial area 15 mins AEON Seremban 2 15 mins Mydin Seremban 2 20 mins Seremban 20 mins Nilai 25 mins LCCT/MAS Hangar/…	2021-10-11	Tiara Sendayan	Bandar Sri Sendayan	Durian	Terrace House	Tiara Sendayan, Bandar Sri Sendayan - Terrace House For Sale	na	-1	-1	na	-1	-1	-1	-1	-1	-1	https://cdn.durianproperty.com.my/images/classified_ads/304809812022983.jpg
490000	2000	3	na	4	Leasehold	na	REN No.: 27307	Hairul	https://www.durianproperty.com.my/classified/3017060/Bandar-Seri-Coalfields-Terrace-House-for-sale-by-HAIRUL	Tell HAIRUL you saw this ad from DurianProperty to get best deal.RENOVATED : DOUBLE STOREY DESA COAFIELD SG BULOH Details : *Leasehold *NON BUMI LOT *22x70 *Built up : 1600 sqft *4 Bedroom 4 Bathroom *2 Family Area (Living Hall) *Dry Kitchen &Wet Kitchen ====================== Asking Price : RM490,000 (NEGO) ======================= -Ceiling Height wall tiles for all bathroom -Carporch design two …	2021-10-11	Bandar Seri Coalfields	Sungai Buloh	Durian	Terrace House	Bandar Seri Coalfields, Sungai Buloh - Terrace House For Sale	Owner Occupied	-1	-1	Intermediate Lot	1540	-1	-1	318.182	-1	-1	https://cdn.durianproperty.com.my/images/classified_ads/301706011806139.jpg
295000	930	2	Partly Furnished	3	Leasehold	na	na	Ahmad Zulhilmi	https://www.durianproperty.com.my/classified/3003971/Brunsfield-Riverview-Condo-for-sale-by-Ahmad-Zulhilmi	Tell Ahmad Zulhilmi you saw this ad from DurianProperty to get best deal.================== CALL: ZUL 016-6667648 PRICE: RM295,000 ================== KLIK > Brunsfield Riverview Seksyen 13 Shah Alam for Sale ================================== For Sale RM295K sahaja 3R2B 930 sqft Multi-level car park Repainted Sedia diduduki Fasiliti Lengkap: 24 hours Security Swimming pool Wading pool Sauna Gym S…	2021-10-11	Brunsfield Riverview	Shah Alam	Durian	Condo	Brunsfield Riverview, Shah Alam - Condo For Sale	na	-1	-1	na	-1	-1	-1	-1	-1	-1	https://cdn.durianproperty.com.my/images/classified_ads/300397111713974.jpg
172000	1000	2	Unfurnished	3	Freehold	1	REN No.: 03184	A Abang Zuhaili	https://www.durianproperty.com.my/classified/3049152/Residensi-Melaka-Tengah-2-Apartment-for-sale-by-A-Abang-Zuhaili	Tell A Abang Zuhaili you saw this ad from DurianProperty to get best deal.RESIDENSI MELAKA TENGAH 2, MELAKA JANGAN LEPASKAN PELUANG!!! HARGA BERMULA RM 150,000!!! HARGA BAWAH RM 200,000!!! * 980 units * Dijangka siap awal tahun 2023 * Malay reserved Discount 20% HOC 10% Rebate 20% Booking RM500 sahaja - 1000 sqft - 3 bilik tidur + 2 bilik air + 1 stor - Balcony - Unit Privacy FASILITI: - Gated & …	2021-10-11	Residensi Melaka Tengah 2	Melaka	Durian	Apartment	Residensi Melaka Tengah 2, Melaka - Apartment For Sale	na	-1	-1	na	-1	-1	-1	-1	-1	-1	https://cdn.durianproperty.com.my/images/classified_ads/304915212030657.jpg
250000	700	2	Partly Furnished	2	Freehold	1	na	Elyntan	https://www.durianproperty.com.my/classified/3048977/Bandar-Baru-Salak-Tinggi-Condo-for-sale-by-ElynTan	Tell ElynTan you saw this ad from DurianProperty to get best deal.Below 30% Market Price New Township Investment AirBnB Luxury 5star Condo @ Tourist Hotspot We Help Rent, We Help Manage, We Help You Earn! .- Price from RM250k, Monthly Installment: RM1100 .- We Help You Rent: RM2200 .- After 5 Years Earn More RM150K CMCO Limited Promo ** 0% Downpayment ** FREE ALL Legal + Disbursement Fees + MOT (…	2021-10-11	Bandar Baru Salak Tinggi	Sepang	Durian	Condo	Bandar Baru Salak Tinggi, Sepang - Condo For Sale	na	-1	-1	na	-1	-1	-1	-1	-1	-1	-1
350000	650	2	Fully Furnished	3	Freehold	1	REN No.: 37888	Daniel Koay Liam Yew	https://www.durianproperty.com.my/classified/3025964/Mutiara-Vista-Condo-for-sale-by-Daniel-Koay-Liam-Yew	Tell Daniel Koay Liam Yew you saw this ad from DurianProperty to get best deal.DISCLAIMER: This is a REAL ADVERTISEMENT and you DESERVE THE REAL INFORMATION. I DON'T advertise fake listing / price / fake pictures to solicit client. Thank you Taman Mutiara Vista @ Jelutong - Nearby: Aspen Residence, Skyview Residence, Damai Vista, Straits Garden, Harmony View, Symphony Park, Taman Kheng Tian and e…	2021-10-11	Mutiara Vista	Jelutong	Durian	Condo	Mutiara Vista, Jelutong - Condo For Sale	na	-1	-1	na	-1	-1	-1	-1	-1	-1	https://cdn.durianproperty.com.my/images/classified_ads/302596411872558.jpg
1300000	1528	3	Fully Furnished	3	Freehold	na	REN No.: 08330	Jacyntha Lee	https://www.durianproperty.com.my/classified/3005251/The-Light-Collection-I-Condo-for-sale-by-Jacyntha-Lee	Tell Jacyntha Lee you saw this ad from DurianProperty to get best deal. -3 Car Parks -Coral View -Morning Sun Unit -Fully Renovated -Fully Furnished Price Negotiable!! Few More Units On Hand For Rent/Sales.. Kinldy Contact Jacyntha Lee@012-4384983 For More Information, Thanks. Website: Centeline Asia (E(1)1891)You may view The Light Collection I Profile here.	2021-10-11	The Light Collection I	The Light	Durian	Condo	The Light Collection I, The Light - Condo For Sale	Vacant	-1	-1	Intermediate Lot	-1	-1	-1	-1	-1	-1	https://cdn.durianproperty.com.my/images/classified_ads/300525111723307.JPG
380000	700	2	Partly Furnished	3	Freehold	na	REN No.: REN 09826	Kelvin Tan Hh	https://www.durianproperty.com.my/classified/3026348/Kingfisher-Series-Condo-for-sale-by-Kelvin-Tan-HH	Tell Kelvin Tan HH you saw this ad from DurianProperty to get best deal.kingfisher / k series / k-series condo located at jalan gangsa, greenlane facilities: swimming pool middle floor 1 car park 3 bedrooms 2 bathrooms fully renovated rm380k interested please call 016-457 7766 thank youPlease see more of my listings at http://kelvintan.myagent.my/.You may view Kingfisher Series Profile here.	2021-10-11	Kingfisher Series	Green Lane	Durian	Condo	Kingfisher Series, Green Lane - Condo For Sale	na	-1	-1	na	-1	-1	-1	-1	-1	-1	https://cdn.durianproperty.com.my/images/classified_ads/302634811875126.jpg
525000	1800	4	Partly Furnished	4	Leasehold	na	na	Adam Baharum	https://www.durianproperty.com.my/classified/3047915/Taman-Cheras-Jaya-Terrace-House-for-sale-by-Adam-Baharum	Tell Adam Baharum you saw this ad from DurianProperty to get best deal.2.5 storey Taman Cheras Jaya @ Taman Cheras Jaya, Balakong COA-FTN (Bank valuation 2020: RM540k) ============================ ASKING PRICE: RM525,000.00 (NEGO TILL LET GO) ============================ DETAILS: - Tenure: Leasehold expiring in 2090 (Non-bumi lot) - Built Up: 1,080 sq ft (18 x 60) - Bedroom: 4 - Bathroom: 4 - 2 C…	2021-10-11	Taman Cheras Jaya	Balakong	Durian	Terrace House	Taman Cheras Jaya, Balakong - Terrace House For Sale	na	-1	-1	na	1080	-1	-1	486.111	-1	-1	https://cdn.durianproperty.com.my/images/classified_ads/304791512021413.jpg
150000	2002	na	na	na	Freehold	na	na	Janice Tan	https://www.durianproperty.com.my/classified/2999452/Taman-Seroja-Terrace-Factory-for-sale-by-janice-tan	Tell janice tan you saw this ad from DurianProperty to get best deal.2 Storey Free Hold Factory Jalan Seroja Bandar Bukit Sentosa Rawang For Sale 2 Storey Factory Jalan Seroja Bandar Bukit Sentosa Rawang For Sale ~~~BUKIT SENTOSA / BERUNTUNG SPECIALIST~~~ Property details: # Freehold # Land area 25x80 # Built Up 2002 sft # Basic Unit # With Title # Near Terrace House, easy to find worker Interest…	2021-10-11	Taman Seroja	Bandar Bukit Beruntung	Durian	Factory	Taman Seroja, Bandar Bukit Beruntung - Terrace Factory For Sale	Vacant	-1	-1	na	2000	-1	-1	75	-1	-1	https://cdn.durianproperty.com.my/images/classified_ads/299945211685652.jpg
1380000	2800	3	Partly Furnished	6 + 1	Leasehold	5	na	Lau3003	https://www.durianproperty.com.my/classified/3040691/Taman-Bukit-Desa-Terrace-House-for-sale-by-lau3003	Tell lau3003 you saw this ad from DurianProperty to get best deal.Few units of 2 Storey House For Sale & rent at Taman Desa. Please call Lau 0103669320 (REN 06302) 3.5Sty Terrace House for SALE Taman Bukit Desa, Kuala Lumpur. Size : 22x110 BU : 2,800sf approx 6+1 Bedrooms 3 Bathroom Basic unit with Kitchen cabinet & built in wardrobe. Selling with lock, stock & barrel. Available for RENT. Nearby …	2021-10-11	Taman Bukit Desa	Taman Desa	Durian	Terrace House	Taman Bukit Desa, Taman Desa - Terrace House For Sale	Vacant	-1	-1	Intermediate Lot	2420	-1	-1	570.248	-1	-1	https://cdn.durianproperty.com.my/images/classified_ads/304069111970575.png
261000	530	1	Partly Furnished	2	Freehold	2	na	Jenson	https://www.durianproperty.com.my/classified/3015671/GEMBOX-Apartment-for-sale-by-Jenson	Tell Jenson you saw this ad from DurianProperty to get best deal.[ For Sale: ] Low Entry Investment, High Return Condo @ DFTZ KLIA Metropolis . [ Details: ] - Studio, 2 Rooms, 3 Rooms Available - Completion 2021, 4Q - FREEHOLD - 100% Guarantee Rental Plan - Attached with 30,000 Students Tenants - Collaboration with Tourism Agency for Accomodation . [ Offer NOW: ] - 0% Deposit - FREE ALL LeGAL - F…	2021-10-11	GEMBOX	Nilai	Durian	Apartment	GEMBOX, Nilai - Apartment For Sale	Vacant	-1	-1	Intermediate Lot	-1	-1	-1	-1	-1	-1	https://cdn.durianproperty.com.my/images/classified_ads/301567111796890.jpg
509000	2000	3	Partly Furnished	4	Leasehold	na	REN No.: REN20444	Lau Kent Hui	https://www.durianproperty.com.my/classified/3039713/Bandar-Nusaputra-Terrace-House-for-sale-by-Lau-Kent-Hui	Tell Lau Kent Hui you saw this ad from DurianProperty to get best deal.For Sale - Bandar Nusaputra - 20*70 - 4 bedrooms 3 bathrooms - peaceful environment - nice and spacious layout - suitable for own stay or investment - asking at RM509,000 negotiable Please contact Kent hui 0109824989 for viewing and more informations VIVAHOMES REALTY (Puchong) (E(3)1353/2)You may view Bandar Nusaputra Profile …	2021-10-11	Bandar Nusaputra	Puchong	Durian	Terrace House	Bandar Nusaputra, Puchong - Terrace House For Sale	Vacant	-1	-1	na	1400	-1	-1	363.571	-1	-1	https://cdn.durianproperty.com.my/images/classified_ads/303971311963658.jpg
393700	1200	3	Unfurnished	3	Freehold	2	na	Nicholes	https://www.durianproperty.com.my/classified/3046798/City-of-Green-Condo-for-sale-by-Nicholes	Tell Nicholes you saw this ad from DurianProperty to get best deal.************************************************************** Bank Lelong -34% City of Green, Taman Bukit Serdang, Seri Kembangan ************************************************************** Alamat : B-27-03, City of Green, Menara B, Jalan PBS 14/2, Taman Bukit Serdang, Seksyen 13, 43300 Seri Kembangan, Selangor * Lelong price …	2021-10-11	City of Green	Taman Perindustrian Bukit Serdang	Durian	Condo	City of Green, Taman Perindustrian Bukit Serdang - Condo For Sale	na	-1	-1	Corner Lot	-1	-1	-1	-1	-1	-1	https://cdn.durianproperty.com.my/images/classified_ads/304679812014022.jpg
580000	1400	3	Partly Furnished	4	Freehold	2	REN No.: 41549	Muhamad Fikri Azib Bin Othman	https://www.durianproperty.com.my/classified/3001655/Taman-Sutera-Terrace-House-for-sale-by-Muhamad-Fikri-Azib-Bin-Othman	Tell Muhamad Fikri Azib Bin Othman you saw this ad from DurianProperty to get best deal.Renovated , Freehold 2 Storey Taman Sutera Kajang ======================• Asking price: RM 580,000 nett ======================= Property Details:- - Freehold / Bumi lot - Land area 20'x 70' - Build up 1900 - 4 bedroom 3 bathroom - Kitchen cabinet - Extended kitchen area. -Plaster ceiling & Lighting. - car park…	2021-10-11	Taman Sutera	Kajang	Durian	Terrace House	Taman Sutera, Kajang - Terrace House For Sale	na	-1	-1	Intermediate Lot	1400	-1	-1	414.286	-1	-1	https://cdn.durianproperty.com.my/images/classified_ads/300165511698291.jpg
898000	3200	4	Partly Furnished	4	Freehold	na	REN No.: 15084	En. Iszsyam	https://www.durianproperty.com.my/classified/3005894/Taman-Pinggiran-Saujana-Semi-D-for-sale-by-En-Iszsyam	Tell En. Iszsyam you saw this ad from DurianProperty to get best deal.[ TITLE ] : [ SUPERB ! ] - 2Sty SEMI-D House ( FULL RENOVATED ) Pinggiran Saujana, Kajang LOCATION : Desa Pinggiran Saujana, Kajang :: DETAILS PROPERTY :: ================= - 2Sty ( SEMI - D ) House - Freehoold ( Non Bumi ) - Land size : 40' x 75 ' - 4 bedrooms & 4 bathrooms - Gated and Guarded - Alarm and Autogate - Kitchen ca…	2021-10-11	Taman Pinggiran Saujana	Kajang	Durian	Semi D	Taman Pinggiran Saujana, Kajang - Semi D For Sale	Owner Occupied	-1	-1	Intermediate Lot	2800	-1	-1	320.714	-1	-1	https://cdn.durianproperty.com.my/images/classified_ads/300589411728227.jpg
1850000	2881	5	Partly Furnished	5	Freehold	na	na	Hana Wahid	https://www.durianproperty.com.my/classified/3010709/Temasya-Citra-Terrace-House-for-sale-by-Hana-Wahid	Tell Hana Wahid you saw this ad from DurianProperty to get best deal.End Lot 2 Storey Super Link Renovated Temasya Citra, Glenmarie Details: Type : 2 Storey End Lot Freehold Non Bumi Lot Land Area : 28x70 sqft 5 Bedrooms 5 Bathrooms Nicely Renovated House Come with plaster ceiling, quality kitchen cabinet & wardrobe... etc Well maintenance & move in condition. Amenities: Convenience to shop lots …	2021-10-11	Temasya Citra	Saujana	Durian	Terrace House	Temasya Citra, Saujana - Terrace House For Sale	na	-1	-1	End Lot	1960	-1	-1	943.878	-1	-1	https://cdn.durianproperty.com.my/images/classified_ads/301070911760807.jpg
315000	900	2	Unfurnished	3	Freehold	3	REN No.: 03857	Seri Jumadil	https://www.durianproperty.com.my/classified/3050883/Taman-Meru-Aman-Terrace-House-for-sale-by-SERI-JUMADIL	Tell SERI JUMADIL you saw this ad from DurianProperty to get best deal.FOR SALE Single Storey Terace Intermediate (Facing Padang Permainan) Taman Meru Aman (Jalan Jabar) KLANG . -Rm315,000 NET -3 bilik tidur -2 bilik air -20x60 -Freehold -Rizab Melayu -Sebelah masjid Nurul Jannah. (Jln kaki 5 mnt sampai) . Facilities and amenities: ========================= - Sekolah Menengah Kebangsaan Meru - Se…	2021-10-11	Taman Meru Aman	Meru	Durian	Terrace House	Taman Meru Aman, Meru - Terrace House For Sale	Owner Occupied	-1	-1	Intermediate Lot	1200	-1	-1	262.5	-1	-1	https://cdn.durianproperty.com.my/images/classified_ads/305088312043514.jpg
68000	634	1	Unfurnished	3	Freehold	na	REN No.: 14280	Rohaini Daud	https://www.durianproperty.com.my/classified/3034691/Bukit-Rawang-Putra-Flat-for-sale-by-Rohaini-Daud	Tell Rohaini Daud you saw this ad from DurianProperty to get best deal.Bukit Rawang Putra Flat (FREEHOLD) For Sale RM68K - Low Cost Flat - 1st Floor CORNER UNIT - Freehold - Build up : 634sqft - Good layout with 3 Room 1 Bathroom - Move In Condition -Walk up apartment Renovation : - Table Top - Fully Tiles * 3 Minutes to KPJ Rawang * 3 Minutes to Rawang Town * Easy Access To Highway Plus ext Tol …	2021-10-11	Bukit Rawang Putra	Rawang	Durian	Flat	Bukit Rawang Putra, Rawang - Flat For Sale	na	-1	-1	Corner Lot	-1	-1	-1	-1	-1	-1	https://cdn.durianproperty.com.my/images/classified_ads/303469111931465.jpg
1028000	1033	na	Partly Furnished	na	Leasehold	na	na	-1	https://www.durianproperty.com.my/classified/2997775/KL-Eco-City-Office-for-sale-by-sc-sam	-KL Eco City Office for sale -Located near Midvalley -Partly furnished with aircond and lightsYou may view KL Eco City Profile here.	2021-10-11	KL Eco City	Kuala Lumpur	Durian	Office	KL Eco City, Kuala Lumpur - Office For Sale	na	-1	-1	na	-1	-1	-1	-1	-1	-1	https://cdn.durianproperty.com.my/images/classified_ads/299777511675230.jpg
183000	650	2	Unfurnished	3	Freehold	1	REN No.: 39397	Mohd Arif B Che Soh	https://www.durianproperty.com.my/classified/3008040/Pangsapuri-Segar-Ria-Apartment-for-sale-by-Mohd-Arif-B-Che-Soh	Tell Mohd Arif B Che Soh you saw this ad from DurianProperty to get best deal.---coalisting-- FOR SALE: Flat Segar Ria, Taman Segar Cheras, KL. Asking Price : RM 183,000 (NEGO) MARKET VALUE : RM 200,000 DETAILS: - Low Cost Apartment - FREEHOLD (Non Bumi Lot) - End lot unit - 5th floor - Block C - Built up : 650 sqft - 3 Bedrooms / 2 Bathrooms - Playground - Open Parking - Mini Market - Surau AMEN…	2021-10-11	Pangsapuri Segar Ria	Taman Segar	Durian	Apartment	Pangsapuri Segar Ria, Taman Segar - Apartment For Sale	Vacant	-1	-1	na	-1	-1	-1	-1	-1	-1	https://cdn.durianproperty.com.my/images/classified_ads/300804011744081.jpg
360000	879	2	Unfurnished	3	Freehold	2	na	Hana Wahid	https://www.durianproperty.com.my/classified/3027791/Desa-Coalfields-Terrace-House-for-sale-by-Hana-Wahid	Tell Hana Wahid you saw this ad from DurianProperty to get best deal.Bandar Seri Coalfields Sungai Buloh Double Storey BRAND NEW + PALING MURAH + TENANTED + FREEHOLD + WELL MAINTAIN ========================= SELLING PRICE: RM 360,000 (NETT) ========================= PROPERTY DETAILS: ========================= + Freehold, Bumi Lot + 1076 Sqft Land Area + 879 Sqft Built Up + 3 Rooms, 2 Bath + Grill…	2021-10-11	Desa Coalfields	Sungai Buloh	Durian	Terrace House	Desa Coalfields, Sungai Buloh - Terrace House For Sale	Owner Occupied	-1	-1	Intermediate Lot	1076	-1	-1	334.572	-1	-1	https://cdn.durianproperty.com.my/images/classified_ads/302779111884589.jpg
850000	1800	3	Partly Furnished	4	Freehold	na	REN No.: 44089	Rafedah Abdul Aziz	https://www.durianproperty.com.my/classified/3035795/Taman-Putra-Prima-Terrace-House-for-sale-by-RAFEDAH-ABDUL-AZIZ	Tell RAFEDAH ABDUL AZIZ you saw this ad from DurianProperty to get best deal.For Sale Double Storey Corner Lot Taman Putra Prima Puchong Selling Price RM850,000 Details: - Land area 3600 sqft. - Built up 1800 sqft - 4 bedrooms - 3 bathrooms - First owner Freehold Non bumi - Individual - Gated - 24 guarded - Facing north east - Partly furnished (Sofa, Coffee table, TV Cabinets, Lightings, Ceiling …	2021-10-11	Taman Putra Prima	Puchong	Durian	Terrace House	Taman Putra Prima, Puchong - Terrace House For Sale	na	-1	-1	na	3600	-1	-1	236.111	-1	-1	https://cdn.durianproperty.com.my/images/classified_ads/303579511937972.jpg
370000	759	2	na	2	Leasehold	1	REN No.: 10368	Nur Amita Tahir	https://www.durianproperty.com.my/classified/3011450/Vista-Alam-Condo-for-sale-by-Nur-Amita-Tahir	Tell Nur Amita Tahir you saw this ad from DurianProperty to get best deal.For Sale: Vista Alam Serviced Apartment Seksyen 14, Shah Alam . . DETAILS : ======== - Leasehold - Bumi Owner - Size : 759 sqft - 2 Bedrooms - 2 Bathrooms - 1 covered car park - Maintenance Fee : RM150 - Gated and Guarded - 24-hours security - Access card entry system . ACCESSIBILITY : ============= - Kesas - Federal - Guth…	2021-10-11	Vista Alam	Shah Alam	Durian	Condo	Vista Alam, Shah Alam - Condo For Sale	na	-1	-1	na	-1	-1	-1	-1	-1	-1	https://cdn.durianproperty.com.my/images/classified_ads/301145011766335.jpeg
1600000	3000	5	Partly Furnished	4 + 1	Freehold	2	REN No.: 18672	Hisyam	https://www.durianproperty.com.my/classified/3016548/Prima-Villa-Semi-D-for-sale-by-Hisyam	Tell Hisyam you saw this ad from DurianProperty to get best deal.Prima Villa @ Saujana Melawati 2.5 storey Semi D Land Area 2844sqft Build up : 3000sqft (approx) 4+1 bedroom 5 bthroom 1 storeroom Built in kitchen cabinet / wardrobe Nice and peaceful area Gated n Guarded - 24 hrs security Freehold - Individual Title Short Driving distance to - Masjid Al-Iman and Kemensah Grocer Giant Taman Permata…	2021-10-11	Prima Villa	Kemensah	Durian	Semi D	Prima Villa, Kemensah - Semi D For Sale	Vacant	-1	-1	Intermediate Lot	2844	-1	-1	562.588	-1	-1	https://cdn.durianproperty.com.my/images/classified_ads/301654811802485.jpg
485000	1200	3	Partly Furnished	3	Leasehold	4	na	Muhammad	https://www.durianproperty.com.my/classified/3039614/Taman-Desa-Bakti-Terrace-House-for-sale-by-Muhammad	Tell Muhammad you saw this ad from DurianProperty to get best deal.END LOT TAMAN DESA BAKTI, SELAYANG-BATU CAVES DEPAN SURAU BELOW MARKET Booking BOLEH SEMBANG Markup loan can be arrange Cash back can be arrange DETAILS PROPERTY : LAND SIZE : 1540 SQFT 3 BILIK 3 BILIK AIR LEASEHOLD/BUNI UNIT ADA PENYEWA KEJIRANAN MELAYU PORCH CAR PARK KITCHEN KABINET AKSES: Jalan Kuching-KL Lake ville Pasar Boron…	2021-10-11	Taman Desa Bakti	Selayang	Durian	Terrace House	Taman Desa Bakti, Selayang - Terrace House For Sale	Tenanted	-1	-1	End Lot	1540	-1	-1	314.935	-1	-1	https://cdn.durianproperty.com.my/images/classified_ads/303961411962915.jpg
3328000	4785	5+	Unfurnished	6	Freehold	na	REN No.: 15525	Jimmy Goh	https://www.durianproperty.com.my/classified/2710664/Taman-Dagang-Bungalow-House-for-sale-by-Jimmy-Goh	Tell Jimmy Goh you saw this ad from DurianProperty to get best deal.2.5 Storey Bungalow House (Brand New) Taman Dagang Jaya, Ampang (R 1664) @ Land Area : 7,049 sf @ Built Up :4,785 sf @ Corner @ FREEHOLD @ 6R 6B @ Wet & Dry Kitchen @ 24 Hour Security @ Gated & Guarded Near by ~ Bandar baru Ampang ~ Taman Kosas ~ Taman Sri Watan ~ Pandan Indah Komersial Sale: RM 3,328,000 (Lawyer & Banker Arrange…	2021-10-11	Taman Dagang	Ampang	Durian	Bungalow House	Taman Dagang, Ampang - Bungalow House For Sale	Vacant	-1	-1	Corner Lot	7049	-1	-1	472.124	-1	-1	https://cdn.durianproperty.com.my/images/classified_ads/271066410059267.jpg
570000	1440	3	Partly Furnished	5	Leasehold	2	na	Fatin Hanani	https://www.durianproperty.com.my/classified/3044541/Taman-Cheras-Jaya-Terrace-House-for-sale-by-Fatin-Hanani	Tell Fatin Hanani you saw this ad from DurianProperty to get best deal.FULLY RENOVATED & FURNISHED 2.5 Storey Taman Cheras Jaya, Balakong ======================= Asking Price: RM570,000.00 (NEGO) Contact: 019-6039890 (Fatin) ======================= Details: ======== - Facing Morning Sun - Large Balcony - Intermediate - Leasehold, Bumi Lot (Tenure 80+ Years) - Land Area 18x80 - 2360 Sq ft - 4 Bedr…	2021-10-11	Taman Cheras Jaya	Balakong	Durian	Terrace House	Taman Cheras Jaya, Balakong - Terrace House For Sale	Tenanted	-1	-1	Intermediate Lot	2360	-1	-1	241.525	-1	-1	https://cdn.durianproperty.com.my/images/classified_ads/304454112000150.jpg
250000	1023	2	Unfurnished	3	Freehold	na	REN No.: PEA1249	Muslih Thani	https://www.durianproperty.com.my/classified/3005056/Regensi-Condo-for-sale-by-Muslih-Thani	Tell Muslih Thani you saw this ad from DurianProperty to get best deal.Walking distances to Centro Mall and easy access to/from Federal highway. Selling below market price RM250K Only FOR SALE: Regency Condominium Klang Jalan Pelangi . . ========================= Selling Price: RM250,000 Nego ========================= . . Propert Details: - Freehold + Non Bumi Lot - 3 Bedroom + 2 Bathroom - Level…	2021-10-11	Regensi	Klang	Durian	Condo	Regensi, Klang - Condo For Sale	na	-1	-1	na	-1	-1	-1	-1	-1	-1	https://cdn.durianproperty.com.my/images/classified_ads/300505611721846.jpg
520000	1362	2	Partly Furnished	3	Leasehold	2	na	Marina	https://www.durianproperty.com.my/classified/3043408/Bayu-Sentul-Condo-for-sale-by-MARINA	Tell MARINA you saw this ad from DurianProperty to get best deal.FOR SALE!!! BAYU SENTUL CONDOMINIUM SENTUL ======================= ASKING PRICE : RM520k ======================= Property details : - Built Up : 1362sqft - 3 Bedrooms | 2 Bathrooms - Leasehold | Bumi Lot - Partly Furnished - Facing klcc - 2 parking side by side - Corner Unit - BANK VALUE : RM600k Accessibilities : - Access from Jln …	2021-10-11	Bayu Sentul	Sentul	Durian	Condo	Bayu Sentul, Sentul - Condo For Sale	Owner Occupied	-1	-1	Corner Lot	-1	-1	-1	-1	-1	-1	https://cdn.durianproperty.com.my/images/classified_ads/304340811992880.jpg
300000	877	2	Unfurnished	3	Leasehold	1	na	Steven Yuen	https://www.durianproperty.com.my/classified/3050083/Sentul-Utama-Condominium-Apartment-for-sale-by-Steven-Yuen	Tell Steven Yuen you saw this ad from DurianProperty to get best deal.STEVEN 010-521 6896 STEVEN 010-521 6896 STEVEN 010-521 6896 >Well kept >Below market price >High rental return >Near amenities area >Easy access *** This property is arguably one of the best in its range a MUST view *** * Good Property for Own Stay / Investment . * easy access near to town . * Photo is just for a DISPLAY to pro…	2021-10-11	Sentul Utama Condominium	Sentul	Durian	Apartment	Sentul Utama Condominium, Sentul - Apartment For Sale	na	-1	-1	na	-1	-1	-1	-1	-1	-1	https://cdn.durianproperty.com.my/images/classified_ads/305008312036775.jpg
950000	7478	na	Unfurnished	na	Leasehold	na	REN No.: 08954	Janis Liew	https://www.durianproperty.com.my/classified/3011762/Taman-Melaka-Raya-Shop-for-sale-by-Janis-Liew	Tell Janis Liew you saw this ad from DurianProperty to get best deal.End Lot 3 Storey Shop Office Taman Melaka Raya, Melaka For Sale Land area 1851sf Build Up 7478sf Non Bumi Lot Leasehold Selling Price RM950K Photo only sample, to protect owner privacy. For viewing appointment, please contact Janis 0166369389. (REN08954) Owner is welcome to list. Dear owner, please feel free to contact Janis 016…	2021-10-11	Taman Melaka Raya	Melaka	Durian	Shop	Taman Melaka Raya, Melaka - Shop For Sale	Vacant	-1	-1	End Lot	1851	-1	-1	513.236	-1	-1	https://cdn.durianproperty.com.my/images/classified_ads/301176211768795.png
670000	1650	3	Partly Furnished	4	Leasehold	2	na	Jimmy Ling	https://www.durianproperty.com.my/classified/3040472/Subang-Bestari-Terrace-House-for-sale-by-Jimmy-Ling	Tell Jimmy Ling you saw this ad from DurianProperty to get best deal.Double Storey Subang Bestari FOR SALE (Add: Jalan Nova U5, Selangor) ======================== For SALE: RM 670,000 ======================== - Leasehold - Bumi - 4 Bedrooms + 3 Bathrooms - Land Area: 22x75 - Move in Conditions - Fully Renovated (Kitchen Cabinet, Plaster Ceiling, TV Cabinet) Interested for viewing please call / sm…	2021-10-11	Subang Bestari	Subang	Durian	Terrace House	Subang Bestari, Subang - Terrace House For Sale	Owner Occupied	-1	-1	Intermediate Lot	1650	-1	-1	406.061	-1	-1	https://cdn.durianproperty.com.my/images/classified_ads/304047211968936.jpg
790000	1600	3	Fully Furnished	5	Freehold	2	REN No.: 16276	Tommy Wong	https://www.durianproperty.com.my/classified/3013080/Cheras-Perdana-Terrace-House-for-sale-by-tommy-wong	Tell tommy wong you saw this ad from DurianProperty to get best deal.Cheras perdana used 2 storey house / guard house / Fully Renovated with 5 room Asking selling price : Rm798,000 neg. for serious buyer n worth buying, if u have any enquiries, please do not hesitate to contact 016-6280206 or whatsapp. Thank You have a nice THE ROOF REALTY (E(3)1462)You may view Cheras Perdana Profile here.	2021-10-11	Cheras Perdana	Cheras South	Durian	Terrace House	Cheras Perdana, Cheras South - Terrace House For Sale	Tenanted	-1	-1	Intermediate Lot	1400	-1	-1	564.286	-1	-1	https://cdn.durianproperty.com.my/images/classified_ads/301308011779329.jpeg
430000	1200	3	Partly Furnished	4	Freehold	3	na	Muhammad	https://www.durianproperty.com.my/classified/3039604/Persada-Aman-Terrace-House-for-sale-by-Muhammad	Tell Muhammad you saw this ad from DurianProperty to get best deal.Double Storey Persada Aman Enstek Nilai N9 Asking Price : RM430k DETAILS ****** Type : Double Storey Status : Freehold - Bumi Lot Size : 1679 Sqft 4 Bedroom 3 Bathroom Reno : Kitchen Cabinet, Table Top Rumah tiada hutang AMENITIES / FACILITIES: ********************* Mosque Shoplot & Mini Markets SK Bandar Enstek SMK Bandar Enstek …	2021-10-11	Persada Aman	Bandar Enstek	Durian	Terrace House	Persada Aman, Bandar Enstek - Terrace House For Sale	Tenanted	-1	-1	Intermediate Lot	1679	-1	-1	256.105	-1	-1	https://cdn.durianproperty.com.my/images/classified_ads/303960411962854.jpg
2780000	3220	5	Partly Furnished	5	Freehold	5+	REN No.: 40471	Petah Shahrir Aidid	https://www.durianproperty.com.my/classified/3044215/Puteri-8-Semi-D-for-sale-by-Petah-Shahrir-Aidid	Tell Petah Shahrir Aidid you saw this ad from DurianProperty to get best deal.Bandar Puteri 8 Puchong Double storey semi-detached house with partly furnished MODERN DESIGN RENOVATION Condition: -Extended Wet & Dry Kitchen Furnished: - Solid Iron Grilled installed - Ceiling Fan at living room and every bedroom - Built-in cabinet in all rooms - Kitchen cabinet installed with build in fridge - Solar…	2021-10-11	Puteri 8	Bandar Puteri Puchong	Durian	Semi D	Puteri 8, Bandar Puteri Puchong - Semi D For Sale	Vacant	-1	-1	End Lot	4348	-1	-1	639.374	-1	-1	https://cdn.durianproperty.com.my/images/classified_ads/304421511998610.jpg
169000	1300	2	na	3	Freehold	na	REN No.: 35542	Npc Hartanah	https://www.durianproperty.com.my/classified/3034605/Bandar-Seri-Astana-Terrace-House-for-sale-by-NPC-Hartanah	Tell NPC Hartanah you saw this ad from DurianProperty to get best deal.Teres Setingkat Bandar Astana Fasa A ani,Kedah. Harga : RM 169,000 Negotiable Property Detail : Terrace Single Storey 3 Bilik Tidur 1 Bilik Air 1 Bilik Tandas Freehold Non Bumi Lot Keluasan 1300 . Renovation : Fully Grilled Owning Baki Tanah Blkg 8 kaki Kejiranan Melayu info : Permintaan sewa tinggi Kawasan Pesat Membangun Ber…	2021-10-11	Bandar Seri Astana	Sungai Petani	Durian	Terrace House	Bandar Seri Astana, Sungai Petani - Terrace House For Sale	na	-1	-1	na	1300	-1	-1	130	-1	-1	https://cdn.durianproperty.com.my/images/classified_ads/303460511930768.jpeg
1494688	3900	na	na	na	Leasehold	na	REN No.: 15525	Jimmy Goh	https://www.durianproperty.com.my/classified/2959617/Merdeka-Ria-Industrial-Park-Terrace-Factory-for-sale-by-Jimmy-Goh	Tell Jimmy Goh you saw this ad from DurianProperty to get best deal.好消息全马最值得买的工厂 ，就在南北当道边North-South Expressway ，买到肯定赚到。 新工厂一层半工厂(1.5 Sty) Pls Contact Jimmy Goh 012-202 9977 for listing (Q 2347) Land Area : 30 x 80 Built Up: 3,230 sf RM 1,245,888 Land Area : 36 x 80 Built Up: 3,900 sf RM 1,494,688 2 Access entrance 80 ft 24 Hour Security With Gated Community Front road 66 ft, Back road 40 ft Fron…	2021-10-11	Merdeka Ria Industrial Park	Ampang	Durian	Factory	Merdeka Ria Industrial Park, Ampang - Terrace Factory For Sale	Vacant	-1	-1	Intermediate Lot	2880	-1	-1	518.989	-1	-1	https://cdn.durianproperty.com.my/images/classified_ads/295961711414827.jpg
200000	1200	2	Fully Furnished	3	na	1	na	Chin Sook Kian	https://www.durianproperty.com.my/classified/3040366/Perak-Condo-for-sale-by-chin-sook-kian	Tell chin sook kian you saw this ad from DurianProperty to get best deal.Condominium for Sale 1200sqft 3rooms 2bath exden One carpark fully furnished Swimming pool Rm 200k(nego)You may view Perak Profile here.	2021-10-11	Perak	Malaysia	Durian	Condo	Perak, Malaysia - Condo For Sale	Vacant	-1	-1	na	-1	-1	-1	-1	-1	-1	https://cdn.durianproperty.com.my/images/classified_ads/304036611968326.jpg
799000	1778	3	Partly Furnished	4	Leasehold	na	REN No.: 10274	Md Soberi Hat	https://www.durianproperty.com.my/classified/3011067/Eco-Grandeur-Terrace-House-for-sale-by-Md-Soberi-Hat	Tell Md Soberi Hat you saw this ad from DurianProperty to get best deal.Eco Grandeur Avenham Garden Bandar Puncak Alam Gated & Guarded Double Storey Intermediate Type : A House Size : 30 x 60 Build-up : 1778 sqft Type of tenure: Leasehold Non Bumi 4 bedrooms and 3 bathrooms Gated and Guarded Warranty 3 years Alarm ready ** Preferred internet TIME fibre up to 1Gbps Amenities ========== - Next to B…	2021-10-11	Eco Grandeur	Bandar Puncak Alam	Durian	Terrace House	Eco Grandeur, Bandar Puncak Alam - Terrace House For Sale	na	-1	-1	na	1800	-1	-1	443.889	-1	-1	https://cdn.durianproperty.com.my/images/classified_ads/301106711763411.jpg
585000	1600	3	Partly Furnished	5	Freehold	na	na	-1	https://www.durianproperty.com.my/classified/3021656/Teluk-Gadong-Terrace-House-for-sale-by-Wan-Li	You may view Teluk Gadong Profile here.	2021-10-11	Teluk Gadong	Klang	Durian	Terrace House	Teluk Gadong, Klang - Terrace House For Sale	Owner Occupied	-1	South-East	Intermediate Lot	-1	-1	-1	-1	-1	-1	-1
500000	1400	3	Unfurnished	4	Leasehold	na	na	Kelvin Chop	https://www.durianproperty.com.my/classified/3003483/Taman-Ehsan-Jaya-Terrace-House-for-sale-by-Kelvin-Chop	Tell Kelvin Chop you saw this ad from DurianProperty to get best deal.DOUBLE STOREY TERRACED HOUSE FOR SALE * Taman Ehsan Jaya @ Jalan Ej 2 * 4 Bedrooms & 3 Bathrooms * Land Area 20 X 70 * Leasehold 999 Years * Fully extended & renovated * 24 Hours Security Gated & Guarded * No Co broke For This Unit * Owner listing are welcome. We will help you marketing your property and provide professional ad…	2021-10-11	Taman Ehsan Jaya	Johor Bahru	Durian	Terrace House	Taman Ehsan Jaya, Johor Bahru - Terrace House For Sale	na	-1	-1	na	-1	-1	-1	-1	-1	-1	https://cdn.durianproperty.com.my/images/classified_ads/300348311711134.jpg
666000	2335	5	Partly Furnished	5	na	3	REN No.: 16712	Connie Chew	https://www.durianproperty.com.my/classified/2791473/Elevia-Residences-Condo-for-sale-by-Connie-Chew	Tell Connie Chew you saw this ad from DurianProperty to get best deal.PUCHONGS NEWEST >> LAKEFRONT RESORT LIVING A stunning lakefront condo in Puchong that promises luxurious lifestyle living amidst a resort setting. Selected units are designed to offer unobstructed panoramic views of the lake and beyond, right from its balcony. With so much living space to play with, you can enjoy the creativity…	2021-10-11	Elevia Residences	Bandar Puchong Utama	Durian	Condo	Elevia Residences, Bandar Puchong Utama - Condo For Sale	Owner Occupied	-1	-1	na	-1	-1	-1	-1	-1	-1	https://cdn.durianproperty.com.my/images/classified_ads/279147311619706.jpg
470000	1126	2	Partly Furnished	4	Freehold	1	REN No.: 23897	Renriz	https://www.durianproperty.com.my/classified/3021587/Precinct-11-Condo-for-sale-by-renriz	Tell renriz you saw this ad from DurianProperty to get best deal.Saujana Aster Condominium Presint 11 Putrajaya For Sale! ======================= 3+1 room 2 bathroom Bumilot 1126 sft Freehold Level 11 Kitchen cabinet 24 hours security 1 parking Swimming pool Gym Playground Multipurpose hall Surau Nearby amenities Primary /Secondary school Lim Kwok Wing University Multimedia University University …	2021-10-11	Precinct 11	Putrajaya	Durian	Condo	Precinct 11, Putrajaya - Condo For Sale	Vacant	-1	-1	Intermediate Lot	-1	-1	-1	-1	-1	-1	https://cdn.durianproperty.com.my/images/classified_ads/302158711838542.jpeg
255000	850	2	Unfurnished	3	Freehold	2	REN No.: 24127	Izad Rushdan Bin Paiza	https://www.durianproperty.com.my/classified/3021180/Saujana-Villa-Apartment-for-sale-by-Izad-Rushdan-Bin-Paiza	Tell Izad Rushdan Bin Paiza you saw this ad from DurianProperty to get best deal.Villa Saujana Suria Apartment, Taman Prima Saujana, Kajang - FREEHOLD - Size: 850 sqft. - Bedroom: 3 - Bathroom: 2 - Spacious living room - Basic Unit - Level 2 - 24 hours security - 2 PARKING LOT Amenities: - Giant, Tesco, CS Supermarket, Mini Market - Secret Recipe, KFC, Pizza Hut, McDonald's - Petronas, Shell, Pet…	2021-10-11	Saujana Villa	Kajang	Durian	Apartment	Saujana Villa, Kajang - Apartment For Sale	Tenanted	-1	-1	End Lot	-1	-1	-1	-1	-1	-1	https://cdn.durianproperty.com.my/images/classified_ads/302118011835478.jpg
440000	1800	3	Partly Furnished	4	Leasehold	na	REN No.: 19523	Hazman	https://www.durianproperty.com.my/classified/2976505/Section-4-Terrace-House-for-sale-by-Hazman	Tell Hazman you saw this ad from DurianProperty to get best deal.Rumah Teres Dua Tingkat, Seksyen 4, Bandar Baru Bangi, Selangor Luas Tanah : 20x80 (1600 sqft) Pegangan : Leasehold, Bumi Lot 4 Bilik, 3 Bilik Air Bahagian hadapan rumah tidak menghadap rumah lain. Lapang dan selesa untuk parking kereta lebih apabila menerima kunjungan tetamu. Lebih ruang tanah di bahagian belakang yang luas. ======…	2021-10-11	Section 4	Bandar Baru Bangi	Durian	Terrace House	Section 4, Bandar Baru Bangi - Terrace House For Sale	na	-1	-1	Intermediate Lot	1600	-1	-1	275	-1	-1	https://cdn.durianproperty.com.my/images/classified_ads/297650511532043.jpg
250000	800	2	Unfurnished	3	Leasehold	na	REN No.: 40695	Norfarizan	https://www.durianproperty.com.my/classified/3001988/Section-7-Shop-Apartment-for-sale-by-Norfarizan	Tell Norfarizan you saw this ad from DurianProperty to get best deal.APARTMENT PUSAT COMMERCIAL sect 7, SHAH ALAM. Asking price : RM250k (nego sampai jadi) DETAILS:- + Built-up size 800 sqft + 3 room 2 bathroom + Leasehold + Bumi Lot + 2nd Floor, Walk-up + Maintenace Fee RM40+/sebulan + Strata Ready FACILITIES:- + Surau [2 Min] + KFC, PIZZA HUT, McD [1 Min] + GIANT [1 Min] + UiTM [5 Min] + I CITY…	2021-10-11	Section 7	Shah Alam	Durian	Shop Apartment	Section 7, Shah Alam - Shop Apartment For Sale	Owner Occupied	-1	-1	Intermediate Lot	-1	-1	-1	-1	-1	-1	https://cdn.durianproperty.com.my/images/classified_ads/300198811701089.jpg
620000	1880	3	Fully Furnished	4	Leasehold	2	na	Shaun Chong	https://www.durianproperty.com.my/classified/3044179/SL11-Terrace-House-for-sale-by-Shaun-Chong	Tell Shaun Chong you saw this ad from DurianProperty to get best deal.Bandar Sungai Long SL11 For Sale Double Storey House Double Storey House 20x70 4 Bedroom, 3 Bathroom Leasehold Fully Renovated With Built In Kitchen Top And Kitchen Cabinet Kitchen Extended Extra Backyard land for gardening or agro farming For viewing, please contact: Shaun Chong 0163314996 VIVAHOMES REALTY (KL) (E(3)1353/5)Ple…	2021-10-11	SL11	Bandar Sungai Long	Durian	Terrace House	SL11, Bandar Sungai Long - Terrace House For Sale	Owner Occupied	-1	-1	Intermediate Lot	1400	-1	-1	442.857	-1	-1	https://cdn.durianproperty.com.my/images/classified_ads/304417911998353.jpg
698000	1680	3	Partly Furnished	4	Freehold	2	na	Suzanchew	https://www.durianproperty.com.my/classified/3016112/Laman-View-Terrace-House-for-sale-by-suzanchew	Tell suzanchew you saw this ad from DurianProperty to get best deal.2 Storey Super Link Terrace 22'x75' Laman View Cyberjaya Putrajaya Contact 016-9487 902 Freehold Residential and Commercial Development Surrounded by Greenery 4 Rooms 3 Baths Land area 22'x75' Built-up 1680 sf Partly furnished Selling price RM698k Facilities - 6 acres central park - 3.5 acres linear park - Jogging track - Bicycle…	2021-10-11	Laman View	Cyberjaya	Durian	Terrace House	Laman View, Cyberjaya - Terrace House For Sale	Tenanted	-1	-1	Intermediate Lot	1650	-1	-1	423.03	-1	-1	https://cdn.durianproperty.com.my/images/classified_ads/301611211799480.jpeg
585000	1734	3	Unfurnished	4	Freehold	na	REN No.: 43690	Nur Alia Omar	https://www.durianproperty.com.my/classified/3019021/Setia-Permai-Terrace-House-for-sale-by-Nur-Alia-Omar	Tell Nur Alia Omar you saw this ad from DurianProperty to get best deal.Negotiable Double Storey (Intermediate) Type Q2 - Adeya Facing South Freehold, Non Bumi Lot 4 rooms, 3 baths Land Area: 1,170 Sqft (18' x 65') Build Up: 1,734 sqft (approx) Bare Unit (New) baru Vacant Possession Address: Setia Permai 3, Jalan Setia Permai U13/41D, Seksyen U13, Setia Alam, 40170 Shah Alam, Selangor Selling Pri…	2021-10-11	Setia Permai	Shah Alam	Durian	Terrace House	Setia Permai, Shah Alam - Terrace House For Sale	Vacant	-1	-1	Intermediate Lot	1170	-1	-1	500	-1	-1	https://cdn.durianproperty.com.my/images/classified_ads/301902111820149.jpg
500000	1672	3	Partly Furnished	3	Freehold	na	REN No.: 44401	Rosmiza Yusop	https://www.durianproperty.com.my/classified/3009529/Taman-Perling-Terrace-House-for-sale-by-Rosmiza-yusop	Tell Rosmiza yusop you saw this ad from DurianProperty to get best deal. Want To Sell TAMAN PERLING, JB House type: 1.5 storey terrace Size: 22x76 Room&bathroom : 3b 3b Leasehold /Freehold : freehold Bumi/International lot : bumi Price:RM 500k nett Renovation works : Renovated - Fully Tiles 1st Floor & Fully Wooden 2nd Floor - Table Top - Kitchen Cabinet - Wardrobe (Master Room) - Bathtub Furnish…	2021-10-11	Taman Perling	Johor Bahru	Durian	Terrace House	Taman Perling, Johor Bahru - Terrace House For Sale	Vacant	-1	-1	Corner Lot	-1	-1	-1	-1	-1	-1	https://cdn.durianproperty.com.my/images/classified_ads/300952911753196.jpg
125000	600	2	na	3	Freehold	1	REN No.: 11682	Keithchew82	https://www.durianproperty.com.my/classified/3012183/Sri-Cempaka-Flat-Apartment-for-sale-by-keithchew82	Tell keithchew82 you saw this ad from DurianProperty to get best deal.Keith 019-2668692 Keith 019-2668692 Keith 019-2668692 >Well kept >Below market price >High rental return >Near amenities area >Easy access *** This property is arguably one of the best in its range a MUST view *** * Good Property for Own Stay / Investment . * easy access near to town . * Photo is just for a DISPLAY to protect o…	2021-10-11	Sri Cempaka Flat	Bandar Sri Damansara	Durian	Apartment	Sri Cempaka Flat, Bandar Sri Damansara - Apartment For Sale	Vacant	-1	-1	na	-1	-1	-1	-1	-1	-1	https://cdn.durianproperty.com.my/images/classified_ads/301218311771710.jpg
330000	1082	2	Partly Furnished	3	Freehold	na	REN No.: 42768	Rasinah Mat Rasol	https://www.durianproperty.com.my/classified/3001837/Vistana-Mahkota-Apartment-for-sale-by-Rasinah-Mat-rasol	Tell Rasinah Mat rasol you saw this ad from DurianProperty to get best deal.APARTMENT VISTANA MAHKOTA , BANDAR MAHKOTA CHERAS, SELANGOR . ASKING PRICE RM 330,000(Nett) CONTACT: RASINAH (0172812193) ======================== . PROPERTY DETAILS : -Type: Apartment -Tenure:Freehold(non-bumi lot) -Strata tittle ready -Size:1082sqft( biggest unit) -Maintenance fees: RM119/month -level 5( 2 lift availabl…	2021-10-11	Vistana Mahkota	Bandar Mahkota Cheras	Durian	Apartment	Vistana Mahkota, Bandar Mahkota Cheras - Apartment For Sale	na	-1	-1	na	-1	-1	-1	-1	-1	-1	https://cdn.durianproperty.com.my/images/classified_ads/300183711699957.jpg
9988888	29000	na	na	na	Leasehold	na	REN No.: 15525	Jimmy Goh	https://www.durianproperty.com.my/classified/2839240/Ulu-Kelang-Commercial-Land-for-sale-by-Jimmy-Goh	Tell Jimmy Goh you saw this ad from DurianProperty to get best deal.Show Room Land Jalan Ulu Klang (Beside MRR2) Pls Contact Jimmy Goh 012-202 9977 for listing (Q 2002) @ Land Area 29,000 sf @ Facing Mainroad @ Commercial Zone -Near by- - Ampang - Zoo Negara - Ukay Perdana - Taman Melawati - Wangsa Maju - Taman Setiawangsa - Taman Melawati - Kemensah Heights Easy access: @ MRR2 Highway @ Duke hig…	2021-10-11	Ulu Kelang	Gombak	Durian	Commercial Land	Ulu Kelang, Gombak - Commercial Land For Sale	Vacant	-1	-1	Intermediate Lot	-1	-1	-1	-1	-1	-1	https://cdn.durianproperty.com.my/images/classified_ads/283924010744335.jpg
445000	1340	2	Partly Furnished	3	Freehold	2	REN No.: 28030	Bailey Tan	https://www.durianproperty.com.my/classified/3011717/BRP-4-Condo-for-sale-by-Bailey-Tan	Tell Bailey Tan you saw this ad from DurianProperty to get best deal.Semi-D Limited Unit Left From【RM425k++】 Bailey Tan 0123431061 Project Details： 【FREEHOLD】 【1400-2780 】 【2-3 Car Parks 】 【Cozy Greenery Surrounded】 【Pure Residential】 【Low Density as 7-8units Per Floor】 【Hoc20】House Ownership Campaign 【1%DownPayment】 【FREE】All Legal Fees 【FREE】Disbursement Fees 【FREE】MOT 【FREE】80% Quality Furnitu…	2021-10-11	BRP 4	Bukit Rahman Putra	Durian	Condo	BRP 4, Bukit Rahman Putra - Condo For Sale	Vacant	-1	-1	Corner Lot	-1	-1	-1	-1	-1	-1	https://cdn.durianproperty.com.my/images/classified_ads/301171711768433.jpg
430000	1900	3	Partly Furnished	4	Freehold	na	na	Saufee Effendy	https://www.durianproperty.com.my/classified/3016232/Taman-Desa-Meru-Indah-Terrace-House-for-sale-by-Saufee-Effendy	Tell Saufee Effendy you saw this ad from DurianProperty to get best deal.FOR SALE : Freehold Malay Reserved 2 Storey Taman Desa Meru Residence Klang Asking Price : RM 430,000 (Nego) DETAILS : ========= * Intermediate unit * Freehold Malay Reserved * Land area : 20 x 80 sqft * Built up area : 1900 sqft * 4 bedrooms 3 bathrooms * Renovations : Kitchen cabinet, grille * Extra land at the back * Stra…	2021-10-11	Taman Desa Meru Indah	Meru	Durian	Terrace House	Taman Desa Meru Indah, Meru - Terrace House For Sale	Vacant	-1	-1	Intermediate Lot	1600	-1	-1	268.75	-1	-1	https://cdn.durianproperty.com.my/images/classified_ads/301623211800374.jpg
128000	560	1	Partly Furnished	3	Leasehold	na	na	-1	https://www.durianproperty.com.my/classified/2997672/Taman-Puchong-Perdana-Flat-for-sale-by-Kelly-Yong	Walking distance to Puchong Perdana LRT station Puchong Perdana Flat, Puchong Selangor Walking distance to LRT station Puchong Perdana, Neighbour with Hilton Hotel Puchong Block E Tingkat 3 walk up flat Layout: 3 bedrooms 1 bathroom Corner unit Title tenure: Leasehold Built up 560sf Selling price RM128K Rental Return (RM 600-650 per month) Appointment and further information, kindly call/whatsapp…	2021-10-11	Taman Puchong Perdana	Puchong	Durian	Flat	Taman Puchong Perdana, Puchong - Flat For Sale	Tenanted	-1	-1	End Lot	-1	-1	-1	-1	-1	-1	https://cdn.durianproperty.com.my/images/classified_ads/299767211674359.JPG
320000	1010	2	Fully Furnished	3	Leasehold	2	REN No.: 37941	Kate Lim	https://www.durianproperty.com.my/classified/3046839/Saujana-Puchong-SP-6-Condo-for-sale-by-Kate-Lim	Tell Kate Lim you saw this ad from DurianProperty to get best deal.New Puchong Lakeside Condominium 3 Bedroom + 2 Bathroom + Balcony + Yard + 2 car park Cheapest price to own your dream house with furnishing completed ==== NOT STUDIO, NOT RSKU, NOT RUMAHWIPS ==== < < TOP 10 Developer Saham >> - Price from RM310k size range 880sf- 1300Ssf - Estimated Monthly Installment RM1.3k Special early-bird d…	2021-10-11	Saujana Puchong SP 6	Puchong	Durian	Condo	Saujana Puchong SP 6, Puchong - Condo For Sale	Vacant	-1	North-East	Corner Lot	-1	-1	-1	-1	-1	-1	https://cdn.durianproperty.com.my/images/classified_ads/304683912014200.jpg
5500000	44659	na	na	na	Leasehold	na	REN No.: 02316	Thean	https://www.durianproperty.com.my/classified/2993756/Shah-Alam-Industrial-Land-for-sale-by-Thean	Tell Thean you saw this ad from DurianProperty to get best deal.LOCATION : Subang New Village (Near Subang Airport) Land Size : 1.025 Ac (44,659sft) Land Type : Industrial Leasehold : 60 years. Expire Sep 2053 Land Shape : Rectangular & pointy (back SPECIAL FEATURES: * Flat and square land * Land was previously cleared * Main road frontage * Surrounded by matured and industry neighbours * Close a…	2021-10-11	Shah Alam	Selangor	Durian	Industrial Land	Shah Alam, Selangor - Industrial Land For Sale	Vacant	-1	-1	na	-1	-1	-1	-1	-1	-1	https://cdn.durianproperty.com.my/images/classified_ads/299375611649275.png
140000	520	1	na	2	Leasehold	na	REN No.: 06498	Sara	https://www.durianproperty.com.my/classified/3007283/Pandan-Jaya-Apartment-for-sale-by-Sara	Tell Sara you saw this ad from DurianProperty to get best deal.For more details and viewing session call c +60122065071 Flat Pandan Jaya FOR SALE !!! RM140,000 ONLY !! (Negotiable) For more info and viewing session call c +60122065071 =================== . DETAILS : ** Leasehold (Bumi Lot) ** Size : 520 sqft ** Blok L30 (Tingkat Atas) ** 2 Bedrooms ** 1 Bathroom ** Kitchen Cabinet ** Table Top **…	2021-10-11	Pandan Jaya	Pandan	Durian	Apartment	Pandan Jaya, Pandan - Apartment For Sale	Tenanted	-1	-1	na	-1	-1	-1	-1	-1	-1	https://cdn.durianproperty.com.my/images/classified_ads/300728311738338.jpeg
330000	1057	2	na	3	Leasehold	1	REN No.: 12134	Halimie	https://www.durianproperty.com.my/classified/3025505/Simfoni-1-Condominium-Apartment-for-sale-by-Halimie	Tell Halimie you saw this ad from DurianProperty to get best deal.MODERN CONCEPT APARTMENT SIMFONI 1 KAJANG, FOR SALE ===================================================== Price : RM 330,000 Details ====== Apartments Leasehold - Bumi lot Bedroom : 3 Bathroom : 2 Built up : 1057 sqft Basic units Facilities ======== Access card 24 hours security Swimming pool & Gymnasium Nursery & Children Playgrou…	2021-10-11	Simfoni 1 Condominium	Bandar Teknologi Kajang	Durian	Apartment	Simfoni 1 Condominium, Bandar Teknologi Kajang - Apartment For Sale	na	-1	-1	na	-1	-1	-1	-1	-1	-1	https://cdn.durianproperty.com.my/images/classified_ads/302550511869211.jpg
638000	1372	2	na	3	Freehold	2	na	Lucas Teoh	https://www.durianproperty.com.my/classified/3022402/Hijauan-Saujana-Condo-for-sale-by-Lucas-Teoh	Tell Lucas Teoh you saw this ad from DurianProperty to get best deal.HIJAUAN SAUJANA FOR SALE -3BEDROOM + 2 BATHROOM -1237SF -STRATA TITLE RELEASED -MID FLOOR -WELL KEPT & MOVE IN CONDITION ***FULL LOAN CAN BE APPLY*** Full Loan OR CashBack CAN BE ARRANGE !!! Full Loan OR CashBack CAN BE ARRANGE !!! Full Loan OR CashBack CAN BE ARRANGE !!! ************ Looking for SERIOUS BUYER ************ Pleas…	2021-10-11	Hijauan Saujana	Saujana	Durian	Condo	Hijauan Saujana, Saujana - Condo For Sale	na	-1	-1	na	-1	-1	-1	-1	-1	-1	https://cdn.durianproperty.com.my/images/classified_ads/302240211845154.jpg
315000	935	2	Unfurnished	3	Leasehold	1	na	Wayne Lee	https://www.durianproperty.com.my/classified/3041918/Taman-Alam-Damai-Condo-for-sale-by-Wayne-Lee	Tell Wayne Lee you saw this ad from DurianProperty to get best deal.PR1MA Alam Damai HOC Package: Better Offer, Free SPA Fee, Free MOT & Free Stamping Property Details : - 935sf - 3 Bedroom, 2 Bathroom - Nice View - 1 Covered Car Park - Move In Condition - Sale: RM315k ++ - Rental : RM 1,000 ++ Accessibility: - Convenient access to Connaught, Taman Len Sen, Tun Hussien Onn, Balakong, Seri Kembang…	2021-10-11	Taman Alam Damai	Cheras	Durian	Condo	Taman Alam Damai, Cheras - Condo For Sale	na	-1	-1	na	-1	-1	-1	-1	-1	-1	https://cdn.durianproperty.com.my/images/classified_ads/304191811980575.jpg
375000	850	2	Partly Furnished	4	Leasehold	2	REN No.: 22296	Alvin Lau	https://www.durianproperty.com.my/classified/3000490/Residensi-Ostia-Condo-for-sale-by-Alvin-Lau	Tell Alvin Lau you saw this ad from DurianProperty to get best deal.PENGUMUMAN KEPADA PEMBELI RUMAH PERTAMA ATAU INVESTOR DI KAWASAN BANGI, KAJANG, NILAI , PUTRAJAYA HANYA DENGAN RM500 BOOKING FEE UNTUK MEMILIKI KONDOMINIUM BARU DI BANDAR BARU BANGI , SELANGOR GAJI RM2,500 SUDAH LAYAK BELI BAYARAN BULANAN RM1,000 SAHAJA !! TANPA PERLU BAYAR DEPOSIT!!! PROJEK KONDO BARU DI BANDAR BARU BANGI, SELAN…	2021-10-11	Residensi Ostia	Bangi	Durian	Condo	Residensi Ostia, Bangi - Condo For Sale	Vacant	-1	-1	Intermediate Lot	-1	-1	-1	-1	-1	-1	https://cdn.durianproperty.com.my/images/classified_ads/300049011690916.jpg
472500	2086	3	Unfurnished	4	Leasehold	2	REN No.: 18616	Hafiz Halim	https://www.durianproperty.com.my/classified/3022721/Kota-Puteri-Terrace-House-for-sale-by-Hafiz-Halim	Tell Hafiz Halim you saw this ad from DurianProperty to get best deal.RUMAH 2 TINGKAT 22'x75' PUTERI AIRA @ KOTA PUTERI. BOOKING ONLY RM1000! HARGA DARI RM 472,500 SELEPAS DISKAUN. LIMITED UNIT AVAILABLE! BOOK SEKARANG! PROPERTY DETAILS : - Total unit : 101 - Leasehold Open Tittle (Bumi Lot and Non Bumi Lot) - Keluasan Tanah 22'x75' sf - Keluasan Rumah dari 2,086 sf - 4 Bilik Tidur, 3 Bilik Air P…	2021-10-11	Kota Puteri	Selangor	Durian	Terrace House	Kota Puteri, Selangor - Terrace House For Sale	na	-1	-1	na	1650	-1	-1	286.364	-1	-1	https://cdn.durianproperty.com.my/images/classified_ads/302272111847566.jpg
725000	2440	4	Unfurnished	4	Freehold	na	REN No.: 07220	Ebanesar Jeevarathnam	https://www.durianproperty.com.my/classified/3025974/S2-Heights-Terrace-House-for-sale-by-Ebanesar-Jeevarathnam	Tell Ebanesar Jeevarathnam you saw this ad from DurianProperty to get best deal.Rumah teres 2 tingkat corner lot untuk dijual di Seremban 2 Heights Corner lot dengan tanah tepi lebih kurang 25 kaki 4 Bilik tidur dan 4 bilik mandi Tingkat atas ketiga-tiga bilik ada bilik air tersendiri OWNER SANGGUP TANGGUNG SEMUA YURAN GUAMAN DAN JUGA MOT Tawaran untuk masa singkat saja Cepat bertindak sebelum te…	2021-10-11	S2 Heights	Seremban 2	Durian	Terrace House	S2 Heights, Seremban 2 - Terrace House For Sale	Vacant	-1	-1	Corner Lot	3443	-1	-1	210.572	-1	-1	https://cdn.durianproperty.com.my/images/classified_ads/302597411872611.jpg
760000	260	5	Unfurnished	5 + 1	Leasehold	2	REN No.: 43308	Mageswaran Rao	https://www.durianproperty.com.my/classified/3009598/Antara-Gapi-Semi-D-for-sale-by-Mageswaran-Rao	Tell Mageswaran Rao you saw this ad from DurianProperty to get best deal.Description Antara Gapi 2 Storey Semi-Detached House - Dimension : 40'x80' - Built-up : L1 - 260.13sqm (about 2,800sqf) L2 - 258.22sqm (about 2,779sqf) L3 - 266.84sqm (about 2,872sqf) L4 - 270.75sqm (about 2,914sqf) - Genting Highlands View and easy access - 5 Bedrooms - Completed and waiting for CFO - Price from RM950,000 b…	2021-10-11	Antara Gapi	Serendah	Durian	Semi D	Antara Gapi, Serendah - Semi D For Sale	na	-1	-1	Intermediate Lot	2800	-1	-1	271.429	-1	-1	https://cdn.durianproperty.com.my/images/classified_ads/300959811753638.jpg
650000	219978	na	na	na	Leasehold	na	REN No.: 36646	Effendy Shohaili	https://www.durianproperty.com.my/classified/3015433/Muar-Agriculture-Land-for-sale-by-effendy-shohaili	Tell effendy shohaili you saw this ad from DurianProperty to get best deal.FOR SALE AGRICULTURAL LAND SUNGAI PANDAN KUANTAN ASKING PRICE FROM RM 3,000,000.00 Specifications: Freehold Open Land area 8.88 acre Workers quarters Store and Office Open Hall Animal barn Rest house Accessibilities: Via Jalan Lapangan Terbang Jalan Gambang Jalan Pintasan Kuantan Lebuhraya Pantai Timur (LPT) For more info …	2021-10-11	Muar	Johor	Durian	Agriculture Land	Muar, Johor - Agriculture Land For Sale	na	-1	-1	na	-1	-1	-1	-1	-1	-1	https://cdn.durianproperty.com.my/images/classified_ads/301543311795319.jpg
325000	1005	na	Unfurnished	3	Freehold	na	na	Foo Sek Mou	https://www.durianproperty.com.my/classified/3050187/Mawar-Apartment-Apartment-for-sale-by-foo-sek-mou	Tell foo sek mou you saw this ad from DurianProperty to get best deal.call foo 0133314482 mawar sentul near to lrt station 3rooms 2bath tenanted good roiYou may view Mawar Apartment Profile here.	2021-10-11	Mawar Apartment	Sentul	Durian	Apartment	Mawar Apartment, Sentul - Apartment For Sale	na	-1	-1	na	-1	-1	-1	-1	-1	-1	https://cdn.durianproperty.com.my/images/classified_ads/305018712037687.jpg
260000	986	2	Unfurnished	3	Leasehold	1	REN No.: 40682	Akmal Bin Adam	https://www.durianproperty.com.my/classified/3020737/Casmaria-Apartment-Apartment-for-sale-by-AKMAL-BIN-ADAM	Tell AKMAL BIN ADAM you saw this ad from DurianProperty to get best deal.FOR SALE: Duplex Casmaria Apartment Batu Caves - 986sqft - 3 Bedrooms & 2 Bathrooms - Duplex Unit - With Parking - Well kept and maintained !!!!!!! Facilities ------ - Parking lot - 24 hours security - Playground - Mini market - Surau Nearby Amenities ------------ - Dolomite Business Park - Banks, Restaurant, Fastfood - GIAN…	2021-10-11	Casmaria Apartment	Batu Caves	Durian	Apartment	Casmaria Apartment, Batu Caves - Apartment For Sale	na	-1	-1	na	-1	-1	-1	-1	-1	-1	https://cdn.durianproperty.com.my/images/classified_ads/302073711832804.jpeg
585000	1650	4	Unfurnished	4	Leasehold	2	na	Zoey Fidd	https://www.durianproperty.com.my/classified/3005313/Taman-Baiduri-Terrace-House-for-sale-by-Zoey-Fidd	Tell Zoey Fidd you saw this ad from DurianProperty to get best deal.WTS Endlot Taman Baiduri 2 Dengkil, (Near to UITM Dengkil) Asking Price RM585K Property Details: - Land Area: 24x80 sqft - Built Up: 20x75 sqft (approx) - Status: Leasehold (Non-Bumi) - 4 rooms/ 4 bathrooms - Endlot / Basic unit - Gated & Gaurded Amenities: - Petronas - Schools, primary & secondary - Commercial areas and banks - …	2021-10-11	Taman Baiduri	Dengkil	Durian	Terrace House	Taman Baiduri, Dengkil - Terrace House For Sale	Tenanted	-1	-1	End Lot	1920	-1	-1	304.688	-1	-1	https://cdn.durianproperty.com.my/images/classified_ads/300531311723825.jpeg
643888	808	2	Partly Furnished	3 + 1	Freehold	2	REN No.: 41689	Kimberly Yap	https://www.durianproperty.com.my/classified/3004181/The-Maple-Residences-Condo-new-launch-by-kimberly-yap	Tell kimberly yap you saw this ad from DurianProperty to get best deal.3R+3B 1163 sf FREEHOLD Linear park and 23++facilities We are the Maple Residence Marketing agent 01163-4141 44 – Kimberly (REN 41689) Local OUG team to serve your new home let's be excited for this Urban Forest project -> OUG Urban Forest Park -> 63-acre mix development -> New OUG Condo linear park -> 4.9 acre residential Conv…	2021-10-11	na	na	Durian	Condo	na	na	-1	-1	Corner Lot	-1	-1	-1	-1	-1	-1	https://cdn.durianproperty.com.my/images/classified_ads/300418111715447.jpg
255000	1000	2	Partly Furnished	3	Leasehold	1	REN No.: 13209	Aishah	https://www.durianproperty.com.my/classified/3012146/Lagoon-Perdana-Apartment-Apartment-for-sale-by-AISHAH	Tell AISHAH you saw this ad from DurianProperty to get best deal.FOR SALE : LAGOON PERDANA APARTMENT. NICE DECORATION PRICE : RM255K AISHAH 0162869495 (REN 13209) whatsapp for fast response (Click this link for more listing) Subscribe YOUTUBE channel Property Details - Level 1 - Block 1 - Build Up : 1000sqft - Bedrooms : 3 - Bathrooms :2 - Bumi - Leasehold - Master title Renovation : Extend Dapur…	2021-10-11	Lagoon Perdana Apartment	Bandar Sunway	Durian	Apartment	Lagoon Perdana Apartment, Bandar Sunway - Apartment For Sale	na	-1	-1	na	-1	-1	-1	-1	-1	-1	https://cdn.durianproperty.com.my/images/classified_ads/301214611771348.jpg
600000	2176	3	Partly Furnished	5	Freehold	na	REN No.: 40728	Maisara Musa	https://www.durianproperty.com.my/classified/3012475/Kampung-Batu-14-Bungalow-House-for-sale-by-Maisara-Musa	Tell Maisara Musa you saw this ad from DurianProperty to get best deal.WTS [GREENERY VIEW] [CORNER UNIT] Single Storey Bungalow, Batu 14, Hulu Langat, Selangor DETAILS ======= Type: Bungalow, Corner Land Area: 5,350 sq ft Built Up: 2,176 sq ft Tenure: Freehold, Malay Reserve 5 rooms, 3 bathrooms Individual title issued CF obtained; plan approved by local council (MPKJ) Plaster ceilings, fully-til…	2021-10-11	Kampung Batu 14	Hulu Langat	Durian	Bungalow House	Kampung Batu 14, Hulu Langat - Bungalow House For Sale	na	-1	-1	na	5350	-1	-1	112.15	-1	-1	https://cdn.durianproperty.com.my/images/classified_ads/301247511774125.jpg
1730000	3053	5+	Partly Furnished	5	Leasehold	na	REN No.: 15525	Jimmy Goh	https://www.durianproperty.com.my/classified/2744262/Duta-Suria-Residency-Semi-D-for-sale-by-Jimmy-Goh	Tell Jimmy Goh you saw this ad from DurianProperty to get best deal.3.5 Storey Semi-D House Duta Suria, Ampang (Q 1747) @ Land Area: 40x70 @ Built Up: 3,053 sf @ Leasehold @ 5 Bedroom 6 bathrooms @ 24 Hour Security Near by: - KL City - Ampang Area - Pandan Area - Korean Village - Ampang Point - Beside MRR2 Rent: RM 5,500.00 Sale: RM 1,730,000 (Banker & Lawyer Arrangment If Needed) Interested Plea…	2021-10-11	Duta Suria Residency	Ampang	Durian	Semi D	Duta Suria Residency, Ampang - Semi D For Sale	Vacant	-1	-1	Intermediate Lot	2800	-1	-1	617.857	-1	-1	https://cdn.durianproperty.com.my/images/classified_ads/274426210238950.jpg
512000	1206	na	Unfurnished	na	Leasehold	na	na	Nicholes	https://www.durianproperty.com.my/classified/3047343/Pusat-Perdagangan-ION-Medini-2-Shop-Office-for-sale-by-Nicholes	Tell Nicholes you saw this ad from DurianProperty to get best deal.************************************************************** Bank Lelong -47% Pusat Perdagangan ION Medini 1, Bandar Medini Iskandar, Iskandar Puteri ************************************************************** Alamat : 30, Blok C1, Pusat Perdagangan ION Medini 1, Persiaran Medini Sentral 6, Bandar Medini Iskandar, 79250 Iskan…	2021-10-11	Pusat Perdagangan ION Medini 2	Johor	Durian	Shop Office	Pusat Perdagangan ION Medini 2, Johor - Shop Office For Sale	na	-1	-1	na	1206	-1	-1	424.544	-1	-1	https://cdn.durianproperty.com.my/images/classified_ads/304734312017900.jpg
699000	1300	2	Partly Furnished	4	Freehold	2	na	W G Wong	https://www.durianproperty.com.my/classified/3029715/Sea-Park-Terrace-House-for-sale-by-W-G-Wong	Tell W G Wong you saw this ad from DurianProperty to get best deal.* 1 Sty Terrace House @ Sea Park, Section 21, Petaling Jaya, for Sale~! * FREEhold * 20' x 70' * 4 Bedrooms 2 bathrooms, original condition * Semi-Furnished : Kitchen top, lights, ceiling & wall fan, windows grille door . * High ceiling space @ center of the house can convert into Loft become 1.5 sty ! * near school, Tmn Bahagia L…	2021-10-11	Sea Park	Petaling Jaya	Durian	Terrace House	Sea Park, Petaling Jaya - Terrace House For Sale	Tenanted	-1	North	Intermediate Lot	1400	-1	-1	499.286	-1	-1	https://cdn.durianproperty.com.my/images/classified_ads/302971511898040.JPG
365000	916	2	Partly Furnished	3	Leasehold	1	REN No.: 20679	Javen Low	https://www.durianproperty.com.my/classified/3018736/D-Alamanda-Condo-for-sale-by-Javen-Low	Tell Javen Low you saw this ad from DurianProperty to get best deal.D'Alamanda Condo @ Pudu Impian for SALE Non Bumi Lot Block D Level 11 This 3 room type 916sf with 3 Room & 2 Bathroom Pls call Javen Low for detail & viewing at 017-311 2788 Thanks D'Alamanda (also known as D'Alamanda @ Pudu Impian) is a mixed development project with service apartments and retail lots that provides numerous town…	2021-10-11	D'Alamanda	Cheras	Durian	Condo	D'Alamanda, Cheras - Condo For Sale	Tenanted	-1	-1	Corner Lot	-1	-1	-1	-1	-1	-1	https://cdn.durianproperty.com.my/images/classified_ads/301873611817873.jpg
230000	750	2	Partly Furnished	3	Leasehold	na	REN No.: 16990	Safuan Rahman	https://www.durianproperty.com.my/classified/3014170/Section-7-Apartment-for-sale-by-Safuan-Rahman	Tell Safuan Rahman you saw this ad from DurianProperty to get best deal.Medium cost Apartment, Seksyen 7, Shah Alam. ===================== ASKING PRICE: RM230,000 nego ===================== Property Detail: -Medium Cost Apartment - - 4th Floor - Build up area: 750 sqft - 3 Bedrooms - 2 Bathrooms Facilities: - Surau - Playground . Amenities: - UITM Shah Alam, Unisel - Hospital Shah Alam - iCity - …	2021-10-11	Section 7	Shah Alam	Durian	Apartment	Section 7, Shah Alam - Apartment For Sale	na	-1	-1	na	-1	-1	-1	-1	-1	-1	https://cdn.durianproperty.com.my/images/classified_ads/301417011786304.jpg
400000	1460	2	Partly Furnished	3	Freehold	2	na	Muhammad Fuad	https://www.durianproperty.com.my/classified/3016166/Embun-Residence-Townhouse-for-sale-by-muhammad-fuad	Tell muhammad fuad you saw this ad from DurianProperty to get best deal.LARGEST UNIT! GROUND FLOOR Embun Residence Townhouse Puncak Saujana Kajang ========================= ASKING PRICE : RM400k ========================= Property Details : ============== Ground Floor Freehold Size: 1460 sqft Bedrooms: 3 Bathrooms: 2 2 Covered Car Park Kitchen Cabinet Kitchen Hood Plaster ceiling Facilities ======…	2021-10-11	Embun Residence	Kajang	Durian	Townhouse	Embun Residence, Kajang - Townhouse For Sale	na	-1	-1	na	1460	-1	-1	273.973	-1	-1	https://cdn.durianproperty.com.my/images/classified_ads/301616611799883.jpg
495000	1760	3	na	3	Freehold	na	REN No.: 38146	Mohamad Nazrin Shah	https://www.durianproperty.com.my/classified/2999859/Taman-Kajang-Utama-Terrace-House-for-sale-by-MOHAMAD-NAZRIN-SHAH	Tell MOHAMAD NAZRIN SHAH you saw this ad from DurianProperty to get best deal.DOUBLE STOREY TERRACE HOUSE,TAMAN KAJANG UTAMA,KAJANG *Below Market PROPERTY DETAILS ================= *FREEHOLD *Non Bumi Lot (Malay Owner) *Individual title *Built up:1760 sqft. *Land area: 22 X 80 sqft. "Bedrooms 3 + 1 store *Bathroom 3 *Big Kitchen Area, Hall *Full Grills *Full Tiles *Light & Fans + Aircond *Parking…	2021-10-11	Taman Kajang Utama	Kajang	Durian	Terrace House	Taman Kajang Utama, Kajang - Terrace House For Sale	Owner Occupied	-1	-1	Intermediate Lot	1760	-1	-1	281.25	-1	-1	https://cdn.durianproperty.com.my/images/classified_ads/299985911687426.jpg
188000	832	2	Partly Furnished	3	Leasehold	na	na	Cheong	https://www.durianproperty.com.my/classified/3001635/Genting-Court-Condo-for-sale-by-Cheong	Tell Cheong you saw this ad from DurianProperty to get best deal.Cheong 014-6378388 Cheong 014-6378388 Cheong 014-6378388 >Well kept >Below market price >High rental return >Near amenities area >Easy access *** This property is arguably one of the best in its range a MUST view *** * Good Property for Own Stay / Investment . * easy access near to town . * Photo is just for a DISPLAY to protect own…	2021-10-11	Genting Court	Setapak	Durian	Condo	Genting Court, Setapak - Condo For Sale	Tenanted	-1	-1	Corner Lot	-1	-1	-1	-1	-1	-1	https://cdn.durianproperty.com.my/images/classified_ads/300163511698101.png
950000	2400	3	na	4	Freehold	na	na	Marina	https://www.durianproperty.com.my/classified/3043616/Taman-Bukit-Emas-Semi-D-for-sale-by-MARINA	Tell MARINA you saw this ad from DurianProperty to get best deal.FOR SALE!!! 2 Storey Semi D Taman Bukit Emas Balakong ======================= SELLING PRICE RM 950,000.00 nett ======================= Detail : -Completion year 2003 -Freehold | Non Bumi Lot -Facing East -Land Size 35' X 75' (2,625 sqft) -Extra land 10 sqft -Build Up Size 2400 Sqft -4 BedRooms 3 Bathrooms -Fully extended backyard an…	2021-10-11	Taman Bukit Emas	Kajang	Durian	Semi D	Taman Bukit Emas, Kajang - Semi D For Sale	Owner Occupied	-1	-1	Intermediate Lot	2625	-1	-1	361.905	-1	-1	https://cdn.durianproperty.com.my/images/classified_ads/304361611993870.jpg
420000	1894	4	Fully Furnished	5	Freehold	2	REN No.: 04008	Khairul Marhan Bin Solehan	https://www.durianproperty.com.my/classified/3050574/Cyberia-SmartHomes-Condo-for-sale-by-khairul-marhan-bin-solehan	Tell khairul marhan bin solehan you saw this ad from DurianProperty to get best deal.Duplex Cyberia Smarthome for Sale =============================== Level 9 Build up : 176.79 sq mtr (1894 sqft) Duplex Type ( 2 storey apartment) 5 Room 4 Bathroom Freehold, Non bumi lot 24 hours security 2 Car park Partial furnished Facing swimming pool, playground Very spacious for medium size family This unit i…	2021-10-11	Cyberia SmartHomes	Cyberjaya	Durian	Condo	Cyberia SmartHomes, Cyberjaya - Condo For Sale	Vacant	-1	-1	na	-1	-1	-1	-1	-1	-1	https://cdn.durianproperty.com.my/images/classified_ads/305057412041114.jpg
868000	5500	na	na	na	Freehold	na	na	Janice Tan	https://www.durianproperty.com.my/classified/3019125/Prima-Beruntung-Bungalow-Lot-for-sale-by-janice-tan	Tell janice tan you saw this ad from DurianProperty to get best deal.Bungalow House,Jln Mawar Prima Beruntung, Bukit Beruntung Bungalow House For SALE @ Jalan Mawar, Prima Beruntung, Bukit Beruntung Type : Double Storey Bungalow Tenure : Freehold Other Info : Non Bumi lot No. of Bedrooms : 5 No. of Bathrooms: 4 Land Area : 5500 sqft Built Up : 3,000 sqft Renovation: -->Swimming Pool -->Full set k…	2021-10-11	Prima Beruntung	Bukit Beruntung	Durian	Bungalow Lot	Prima Beruntung, Bukit Beruntung - Bungalow Lot For Sale	Tenanted	-1	-1	Intermediate Lot	-1	-1	-1	-1	-1	-1	https://cdn.durianproperty.com.my/images/classified_ads/301912511820855.jpg
900000	1524	3	Fully Furnished	4	Freehold	3	REN No.: 44046	Catrin Hoo	https://www.durianproperty.com.my/classified/3043475/The-Reach-Condo-for-sale-by-catrin-hoo	Tell catrin hoo you saw this ad from DurianProperty to get best deal.The REACH FULLY FURNISHED Titiwangsa For Sale Catrin 0127286827 Henry 0162912290 whatsapp Link (Catrin) (Henry) Sale RM 900 K # FULLY FURNISHED # 1524sf # 3+1 Rooms 3 Bathrooms # 2 Carpark ** Aircond ** Kitchen Cabinet ** Hood & Hob ** Fridge ** Washing Machine ** Curtain ** TV ** Water Heater ** Sofa ** Bed ** Wardrobe Addition…	2021-10-11	The Reach	Titiwangsa	Durian	Condo	The Reach, Titiwangsa - Condo For Sale	na	-1	-1	na	-1	-1	-1	-1	-1	-1	https://cdn.durianproperty.com.my/images/classified_ads/304347511993386.jpeg
691000	2100	5	Partly Furnished	5	Leasehold	3	REN No.: 16712	Connie Chew	https://www.durianproperty.com.my/classified/2789899/The-Wharf-Residence-Condo-for-sale-by-Connie-Chew	Tell Connie Chew you saw this ad from DurianProperty to get best deal.PUCHONGS NEWEST >> LAKEFRONT RESORT LIVING A stunning lakefront condo in Puchong that promises luxurious lifestyle living amidst a resort setting. Selected units are designed to offer unobstructed panoramic views of the lake and beyond, right from its balcony With so much living space to play with, you can enjoy the creativity …	2021-10-11	The Wharf Residence	Taman Tasik Prima	Durian	Condo	The Wharf Residence, Taman Tasik Prima - Condo For Sale	Vacant	-1	-1	na	-1	-1	-1	-1	-1	-1	https://cdn.durianproperty.com.my/images/classified_ads/278989911618959.jpg
370000	938	2	Partly Furnished	3	Leasehold	1	na	Sl.Yap	https://www.durianproperty.com.my/classified/3025318/Danau-Idaman-Condo-for-sale-by-SL-YAP	Tell SL.YAP you saw this ad from DurianProperty to get best deal.DANAU IDAMAN CONDOMINIUM at Taman Danau Desa * 938sqft * 3 bedrooms 2bathrooms * renovated * nice unit * end lot * tiles flooring in the bedrooms * furnished unit * pool view * good for own stay or invest * easy to rent out Strategic location :- walking distance to Plaza Danau as shopping or office centers with taxi/bus stop rights …	2021-10-11	Danau Idaman	Taman Danau Desa	Durian	Condo	Danau Idaman, Taman Danau Desa - Condo For Sale	na	-1	-1	End Lot	-1	-1	-1	-1	-1	-1	https://cdn.durianproperty.com.my/images/classified_ads/302531811867759.jpg
300000	1300	3	Partly Furnished	4	Freehold	2	REN No.: 24700	Rozana Property	https://www.durianproperty.com.my/classified/3015240/Garden-Avenue-Terrace-House-for-sale-by-Rozana-Property	Tell Rozana Property you saw this ad from DurianProperty to get best deal.DOUBLE STOREY GARDEN AVENUE SEREMBAN 2 ============================ ASKING PRICE : RM300K NEGO ============================ DETAIL : - 2 storey intermediate - Freehold, - Non-Bumi lot - Built Up: 1300 sqft approx - Land Size : 18 x 60 - 4 Bedrooms, - 3 Bathrooms AMENITIES : - AEON Seremban, Mydin, Tesco, NSK - McD, Starbuck…	2021-10-11	Garden Avenue	Seremban 2	Durian	Terrace House	Garden Avenue, Seremban 2 - Terrace House For Sale	Owner Occupied	-1	-1	Intermediate Lot	1080	-1	-1	277.778	-1	-1	https://cdn.durianproperty.com.my/images/classified_ads/301524011793911.jpg
525000	1380	2	Fully Furnished	3	Leasehold	2	REN No.: 17778	Azlan Abd Hamid	https://www.durianproperty.com.my/classified/2869427/Sri-Lojing-Condo-for-sale-by-Azlan-Abd-Hamid	Tell Azlan Abd Hamid you saw this ad from DurianProperty to get best deal.FOR SALE: SRI LOJING CONDOMINUM SEKSYEN 10 WANGSA MAJU Leasehold-bumi lot / 1380 sf./ Strata ready 3 rooms & 2 baths/ 2 car parks / Fully furnished 2 balconies (master bedroom & living area) -Kitchen cabinet/ built-in wardrobe / security grill -Air-conditioner units / Sofa / Dining Table/ Bed *Famously known for its low den…	2021-10-11	Sri Lojing	Wangsa Maju	Durian	Condo	Sri Lojing, Wangsa Maju - Condo For Sale	na	-1	-1	Intermediate Lot	-1	-1	-1	-1	-1	-1	https://cdn.durianproperty.com.my/images/classified_ads/286942710898541.jpg
410000	1130	2	Unfurnished	3	Leasehold	2	na	Laili	https://www.durianproperty.com.my/classified/3014596/Suri-Puteri-Condo-for-sale-by-laili	Tell laili you saw this ad from DurianProperty to get best deal.Suri Puteri Serviced Apartment House details: Built-up : 1130 sqft (big size) 3 bedrooms / 2 bathrooms High floor 2 unit aircond 2 parking lot (fully covered & nearby access to lift). Renovation ~ kitchen cabinet Strata title ready. Easy to transfer to new owner. Nice view - facing Shah Alam city. ASKING PRICE: RM410K For more inform…	2021-10-11	Suri Puteri	Section 20	Durian	Condo	Suri Puteri, Section 20 - Condo For Sale	na	-1	-1	na	-1	-1	-1	-1	-1	-1	https://cdn.durianproperty.com.my/images/classified_ads/301459611790119.jpeg
640000	1114	2	Fully Furnished	3	Freehold	2	na	-1	https://www.durianproperty.com.my/classified/3044879/Symphony-Tower-Condo-for-sale-by-PHUA-JS	Tell PHUA JS you saw this ad from DurianProperty to get best deal.New Unit with Fully Furnished in Symphony Tower @ Cheras South For Sale!!! Symphony Tower (Menara Simfoni), Balakong, Seri Kembangan Lebuhraya SILK, Balakong, 43300, Selangor ***Photo is Actual Unit *** UNIT SALE AT 640k -------------------------------------------------------------------------- - Building Complete at 2019 - Propert…	2021-10-11	Symphony Tower	Balakong	Durian	Condo	Symphony Tower, Balakong - Condo For Sale	na	-1	-1	Intermediate Lot	1114	-1	-1	574.506	-1	-1	https://cdn.durianproperty.com.my/images/classified_ads/304487912002861.jpg
3600000	5400	5+	Partly Furnished	7 + 1	Freehold	4	REN No.: 17778	Azlan Abd Hamid	https://www.durianproperty.com.my/classified/3036631/Damaisari-Bungalow-House-for-sale-by-Azlan-Abd-Hamid	Tell Azlan Abd Hamid you saw this ad from DurianProperty to get best deal.Triple Storey Bunglow Damai Sari, Wangsa Melawati -Located in strategic location & secured neighborhood -Low density, peaceful & safe -Close to Melawati Mall, Wangsa Walk Mall & Aeon Wangsa Maju, Wangsa Maju LRT Station FOR SALE: Triple Storey Zero Lot Bunglow Freehold Land Area: 3864 sqft Built-up Area: 5400 sqft 7+1 Bedro…	2021-10-11	Damaisari	Wangsa Maju	Durian	Bungalow House	Damaisari, Wangsa Maju - Bungalow House For Sale	Vacant	-1	-1	Intermediate Lot	3864	-1	-1	931.677	-1	-1	https://cdn.durianproperty.com.my/images/classified_ads/303663111942382.jpg
257200	500	1	Partly Furnished	2	Freehold	2	na	Jenson	https://www.durianproperty.com.my/classified/3013507/Bukit-Bintang-Apartment-for-sale-by-Jenson	Tell Jenson you saw this ad from DurianProperty to get best deal.Best Own Stay Studio l 1st House Buyer l Save 80k Cash Back 30k Super Cheap ! Super Value ! Don't missed this investment Opportunity !! Earn Income !! Welcome Investors !! Best Invest Property !! MR NG 014-3471594 Promotion Package Until this week !! ~ Free Renovation Save 10k ~ Free Furniture Save 30k ~ 20% Rebate Save 60k ~Below M…	2021-10-11	Bukit Bintang	KL City Centre	Durian	Apartment	Bukit Bintang, KL City Centre - Apartment For Sale	Vacant	-1	-1	Corner Lot	-1	-1	-1	-1	-1	-1	https://cdn.durianproperty.com.my/images/classified_ads/301350711782392.jpg
560270	649	1	Partly Furnished	0	Leasehold	1	na	Gary Lim	https://www.durianproperty.com.my/classified/3038352/Jesselton-Twin-Towers-Condo-for-sale-by-Gary-Lim	Tell Gary Lim you saw this ad from DurianProperty to get best deal.JESSELTON TWIN TOWERS Location - Located at Prime Location - Behind KPJ & QE2 - Beside City Mall Kota Kinabalu, Sabah - Surrounded with VIP lots - Government sector - Better Environment __________________________________________________ Accessibility Shopping & Leisure ( within 10 mins drive ) - Imago Shopping Mall - Suria Sabah H…	2021-10-11	Jesselton Twin Towers	Kota Kinabalu	Durian	Condo	Jesselton Twin Towers, Kota Kinabalu - Condo For Sale	Vacant	-1	-1	Intermediate Lot	-1	-1	-1	-1	-1	-1	https://cdn.durianproperty.com.my/images/classified_ads/303835211954980.jpg
567800	972	2	Partly Furnished	3 + 1	Leasehold	2	na	Mr Jeson Chiew	https://www.durianproperty.com.my/classified/3041261/KAIA-Heights-Equine-Park-Condo-new-launch-by-Mr-Jeson-Chiew	Tell Mr Jeson Chiew you saw this ad from DurianProperty to get best deal.Hilltop Lifestyle Living UEM Sunrise proudly presents KAIA Heights in Equine Park. This 19.24-acre hilltop development is built around our “Recapture, Replenish, Restore” 3-generation living concept. A 6-acre nature reserve surrounds the development, making KAIA Heights truly unique. Combining hilltop and nature living, resi…	2021-10-11	na	na	Durian	Condo	na	na	-1	-1	Corner Lot	-1	-1	-1	-1	-1	-1	https://cdn.durianproperty.com.my/images/classified_ads/304126111974777.jpg
1100000	2408	4	Unfurnished	4	Freehold	2	REN No.: 47932	Azizan Aj	https://www.durianproperty.com.my/classified/3032734/Elmina-West-Terrace-House-for-sale-by-Azizan-AJ	Tell Azizan AJ you saw this ad from DurianProperty to get best deal.Double Storey Terrace Corner Lot Elmina Green West, Jalan Casuarina Shah alam ASKING PRICE: -RM 1.1M (SPA PRICE) DETAILS: -Freehold (Open Title) -Built Up: 2,408 sqft -Land Area: 3,060.82 sqft -4 Bedroom & 4 Bathroom FACILITIES: - Playground, Landscape, Extra Land - 24hrs security with gated & guarded - jogging track AMENITIES: -…	2021-10-11	Elmina West	Shah Alam	Durian	Terrace House	Elmina West, Shah Alam - Terrace House For Sale	Vacant	-1	-1	Corner Lot	3060	-1	-1	359.477	-1	-1	https://cdn.durianproperty.com.my/images/classified_ads/303273411918566.jpg
300000	985	2	Unfurnished	3	Freehold	1	na	Zulrizqhartanah	https://www.durianproperty.com.my/classified/3051176/Belimbing-Heights-Apartment-for-sale-by-Zulrizqhartanah	Tell Zulrizqhartanah you saw this ad from DurianProperty to get best deal.PANGSAPURI BELIMBING HEIGHTS | SERI KEMBANGAN | SELANGOR | FOR SALE PRICE : RM 300 000 PROPERTY PROFILE Unit Type : Apartment Land Area : 985 sq ft Tenure : Freehold Bedrooms : 3 Bathroom : 2 - Level 8 - Lift - 1 covered parking lot *Currently ada tenant duduk Located at Jalan Belimbing Indah, Taman Harmoni Indah, 43300 Ser…	2021-10-11	Belimbing Heights	Seri Kembangan	Durian	Apartment	Belimbing Heights, Seri Kembangan - Apartment For Sale	Vacant	-1	-1	Intermediate Lot	-1	-1	-1	-1	-1	-1	https://cdn.durianproperty.com.my/images/classified_ads/305117612045679.jpg
488000	1130	2	na	3	Leasehold	2	na	Lucas Teoh	https://www.durianproperty.com.my/classified/3017446/Dynasty-Garden-Condo-for-sale-by-Lucas-Teoh	Tell Lucas Teoh you saw this ad from DurianProperty to get best deal.DYNASTY GARDEN CONDO FOR SALE -3BEDROOM + 2 BATHROOM -1130SF -STRATA TITLE RELEASED -MID FLOOR -WELL KEPT & MOVE IN CONDITION ***FULL LOAN CAN BE APPLY*** FIRST HOME BUYER GET HIGH DISCOUNT ON LEGAL FEES !!! Full Loan OR CashBack CAN BE ARRANGE !!! Full Loan OR CashBack CAN BE ARRANGE !!! Full Loan OR CashBack CAN BE ARRANGE !!!…	2021-10-11	Dynasty Garden	Kuchai Lama	Durian	Condo	Dynasty Garden, Kuchai Lama - Condo For Sale	na	-1	-1	na	-1	-1	-1	-1	-1	-1	https://cdn.durianproperty.com.my/images/classified_ads/301744611808468.jpg
200000	750	2	Unfurnished	4	Leasehold	0	REN No.: 36818	Abdul Muiz Bin Misri	https://www.durianproperty.com.my/classified/3020139/Section-7-Apartment-for-sale-by-Abdul-Muiz-Bin-Misri	Tell Abdul Muiz Bin Misri you saw this ad from DurianProperty to get best deal.Flat pkns seksyen 7 shah alam hot area ============================ Asking price :RM200k below mv 750 sqft 3R2B converted to 4r2b Leasehold bumi lot Lvl 3 Tenanted - perhead rm200 Market rental can achieve rm1100-rm1200 ============================ Please Contact for further information and viewing arrangement: For mor…	2021-10-11	Section 7	Shah Alam	Durian	Apartment	Section 7, Shah Alam - Apartment For Sale	Tenanted	-1	-1	Intermediate Lot	-1	-1	-1	-1	-1	-1	https://cdn.durianproperty.com.my/images/classified_ads/302013911828766.jpeg
800000	1409	3	Partly Furnished	3	Freehold	2	REN No.: e1286	Michelle Poon	https://www.durianproperty.com.my/classified/3009153/The-Leafz-Condo-for-sale-by-Michelle-Poon	Tell Michelle Poon you saw this ad from DurianProperty to get best deal.PROPERTY DETAILS Name: The Leafz Address: Off Jalan Kuchai Lama, Sungai Besi, Kuala Lumpur Developer: Exsim Development Completion Year: 2015 Type: Serviced Apartment Tenure: Freehold No. of Blocks: 3 No. of Storey: 22 No. of Units: 643 Land Area: 3.3 acres Built-up: 750 - 1,500 sf Maintenance Fee: RM0.44 psf Launch Price: Fr…	2021-10-11	The Leafz	Sungai Besi	Durian	Condo	The Leafz, Sungai Besi - Condo For Sale	Tenanted	-1	-1	Corner Lot	-1	-1	-1	-1	-1	-1	https://cdn.durianproperty.com.my/images/classified_ads/300915311750161.JPG
475000	2250	3	Unfurnished	4 + 1	Freehold	na	REN No.: NA	Ariff Yaacob	https://www.durianproperty.com.my/classified/3022710/Taman-Sri-Andalas-Terrace-House-for-sale-by-Ariff-Yaacob	Tell Ariff Yaacob you saw this ad from DurianProperty to get best deal.Double Storey Intermediate Lorong Sri Damak 27d Taman Sri Andalas Klang Asking price: RM475k nett Details: ▪️Type: Double Storey Intermediate ▪️Land area: 20x75 ▪️Built up: 2250sqft ▪️4r + 1 Store, 3 Br ▪️Freehold ▪️Malay Reserved ▪️Extended kitchen ▪️Table top with built in kitchen cabinet ▪️Built in wardrobe ▪️Plaster ceilin…	2021-10-11	Taman Sri Andalas	Klang	Durian	Terrace House	Taman Sri Andalas, Klang - Terrace House For Sale	Vacant	-1	-1	Intermediate Lot	1500	-1	-1	316.667	-1	-1	https://cdn.durianproperty.com.my/images/classified_ads/302271011847466.jpg
230000	750	2	na	3	Freehold	na	na	-1	https://www.durianproperty.com.my/classified/2997623/Bandar-Botanic-Apartment-for-sale-by-elwin-lee-shen-huong	WTS Klang Botanic, Akasia Apartment Top floor X lift 750sqft Basic with Good Condition Partial Furnished 3Rooms 2Bathroom Gated & Guarded 1 Car Park ( 1 Rented) Asking Price RM230k PM Elwin 601111973929 THE ROOF REALTY (E(3)1462)You may view Bandar Botanic Profile here.	2021-10-11	Bandar Botanic	Klang	Durian	Apartment	Bandar Botanic, Klang - Apartment For Sale	na	-1	-1	na	-1	-1	-1	-1	-1	-1	https://cdn.durianproperty.com.my/images/classified_ads/299762311674022.jpg
1050000	1710	4	Fully Furnished	4	Freehold	2	REN No.: 28223	Sean Chin	https://www.durianproperty.com.my/classified/3002421/Le-Yuan-Residence-Condo-for-sale-by-Sean-Chin	Tell Sean Chin you saw this ad from DurianProperty to get best deal.Fully Furnished Le Yuan Condo Happy Garden Old Klang Road Facing Beach For Sale * Face south, face greenery, face beach & face pool. If too high floor, cannot see beach clearly. - Freehold - Built Up: 1,710 sq ft - 4Rooms + 4Baths - 2 Car Parks - Beach View, Pool View & Facing Greenery - Fully Furnished - Artificial Beach, Resort…	2021-10-11	Le Yuan Residence	Kuchai Lama	Durian	Condo	Le Yuan Residence, Kuchai Lama - Condo For Sale	Owner Occupied	-1	-1	Intermediate Lot	-1	-1	-1	-1	-1	-1	https://cdn.durianproperty.com.my/images/classified_ads/300242111703802.jpg
748000	1000	2	na	3	Freehold	1	na	Lucas Teoh	https://www.durianproperty.com.my/classified/3021963/Waldorf-Tower-Condo-for-sale-by-Lucas-Teoh	Tell Lucas Teoh you saw this ad from DurianProperty to get best deal.WALDORF TOWER FOR SALE -3BEDROOM + 2 BATHROOM -1000SF - 1 covered carpark -STRATA TITLE RELEASED -MID FLOOR -PALACE AND KLCC VIEW -WELL KEPT & MOVE IN CONDITION ***FULL LOAN CAN BE APPLY*** Full Loan OR CashBack CAN BE ARRANGE !!! Full Loan OR CashBack CAN BE ARRANGE !!! Full Loan OR CashBack CAN BE ARRANGE !!! ************ Look…	2021-10-11	Waldorf Tower	Sri Hartamas	Durian	Condo	Waldorf Tower, Sri Hartamas - Condo For Sale	na	-1	-1	na	-1	-1	-1	-1	-1	-1	https://cdn.durianproperty.com.my/images/classified_ads/302196311841490.jpeg
900000	1250	2	Fully Furnished	4	Leasehold	na	REN No.: 26151	Jasang	https://www.durianproperty.com.my/classified/3005237/Marinox-Sky-Villas-Condo-for-sale-by-jasang	Tell jasang you saw this ad from DurianProperty to get best deal.Marinox Sky Villas, Tanjung Tokong Build up : 1250 sqft Bedrooms : 3 Bathroom : 2 car park : 2 Fully furnished Asking Selling RM900,000 For More information, Kindly Contact JAS ANG 012-4081848 Centeline AsiaYou may view Marinox Sky Villas Profile here.	2021-10-11	Marinox Sky Villas	Seri Tanjung Pinang	Durian	Condo	Marinox Sky Villas, Seri Tanjung Pinang - Condo For Sale	na	-1	-1	na	-1	-1	-1	-1	-1	-1	https://cdn.durianproperty.com.my/images/classified_ads/300523711723214.jpeg
1600000	3612	5	na	4	Freehold	na	na	Rosliza Awi	https://www.durianproperty.com.my/classified/3021290/Villa-Sri-Ukay-Semi-D-for-sale-by-Rosliza-Awi	Tell Rosliza Awi you saw this ad from DurianProperty to get best deal.KLCC & Panoramic View Hilltop Area 3 STOREY CORNER SEMI-D Villa Sri Ukay Ampang ------------------------------------- Asking Price : RM1.60Mil (Negotiable) ====================== PROPERTY DETAILS ----------------------- * Low Density area * 3 Storey Corner Semi D * Land Size 40 X 80 * Built up 3612sf * Partly renovated * Tenure…	2021-10-11	Villa Sri Ukay	Ukay	Durian	Semi D	Villa Sri Ukay, Ukay - Semi D For Sale	Vacant	-1	-1	na	3200	-1	-1	500	-1	-1	https://cdn.durianproperty.com.my/images/classified_ads/302129011836490.jpg
690000	1778	3	Unfurnished	4	Leasehold	na	REN No.: 10274	Md Soberi Hat	https://www.durianproperty.com.my/classified/3010213/Eco-Grandeur-Terrace-House-for-sale-by-Md-Soberi-Hat	Tell Md Soberi Hat you saw this ad from DurianProperty to get best deal.2 Stry Avenham Garden Gated Guarded Puncak Alam nice Lanscape Double Storey Intermediate, Eco Grandeur (Type A) Avenham Garden, Bandar Puncak Alam Details Leasehold, Bumi Strata Title Land Area : 30x60. Built Up : 1778 sf 4 Rooms & 3 Baths Alarm system GUARDED & GATED. OWN HOME GARDEN. PLAYGROUND, CYCLING AND WALKING PATH Acc…	2021-10-11	Eco Grandeur	Bandar Puncak Alam	Durian	Terrace House	Eco Grandeur, Bandar Puncak Alam - Terrace House For Sale	na	-1	-1	na	1800	-1	-1	383.333	-1	-1	https://cdn.durianproperty.com.my/images/classified_ads/301021311757734.jpg
4500000	7718	na	Unfurnished	na	Freehold	na	na	Max Pek	https://www.durianproperty.com.my/classified/3035798/Akasa-Residence-Shop-Office-for-sale-by-Max-Pek	Tell Max Pek you saw this ad from DurianProperty to get best deal.=== BRAND NEW === AKASA BUSINESS PARK Shop/Office with lift CHERAS Balakong HOT Spot Area !!! Golden Triangle Landmark !!! Opposite >>> Cheras Balakong Mercedes Car Showroom First-Class Business Park Feel Like Bangsar South @ 5-8-Storey Shops & Signature Offices at Cheras South is FREEHOLD Now Open For SALES ~ Completed SOON in 202…	2021-10-11	Akasa Residence	Cheras South	Durian	Shop Office	Akasa Residence, Cheras South - Shop Office For Sale	na	-1	-1	na	-1	-1	-1	-1	-1	-1	https://cdn.durianproperty.com.my/images/classified_ads/303579811937999.jpg
1220000	1635	3	na	4	Freehold	2	REN No.: 08495	Elynne Leong	https://www.durianproperty.com.my/classified/3011146/Mira-Residence-Condo-for-sale-by-Elynne-Leong	Tell Elynne Leong you saw this ad from DurianProperty to get best deal.Mira Residence with Pool view !! Location: Tanjung Bungah Type: Condominium Tenure: Freehold Built up: Car park: 2 No. of Bedrooms: 3+1 No. of Bathrooms: 2+1 Condition: Move In Condition Price: RM 1,220,000.00 (view & offer) ** few units on hand ** Call for more detail & viewing now ! Thanks !! Elynne (REN 08495) 012-313 9775 …	2021-10-11	Mira Residence	Tanjung Bungah	Durian	Condo	Mira Residence, Tanjung Bungah - Condo For Sale	na	-1	-1	na	-1	-1	-1	-1	-1	-1	https://cdn.durianproperty.com.my/images/classified_ads/301114611764150.jpg
570000	1800	3	na	4	Leasehold	na	REN No.: 34830	Fathie Shah	https://www.durianproperty.com.my/classified/3020694/Bukit-Bandaraya-Terrace-House-for-sale-by-Fathie-Shah	Tell Fathie Shah you saw this ad from DurianProperty to get best deal.Seksyen U11, Jalan Gunung Nuang, Bukit Bandaraya, Shah Alam FULLY RENOVATED+FULLY EXTENDED+CANTIK GILA For Sale!!!! ======================================= PROPERTY DETAILS: ======================================= # Leasehold, Bumi Lot # 20x70 Square Feet Land Area # 1800 Square Feet Built Up # 4 Rooms, 3 Bath # Renovated Unit …	2021-10-11	Bukit Bandaraya	Shah Alam	Durian	Terrace House	Bukit Bandaraya, Shah Alam - Terrace House For Sale	Owner Occupied	-1	-1	Intermediate Lot	1400	-1	-1	407.143	-1	-1	https://cdn.durianproperty.com.my/images/classified_ads/302069411832504.jpeg
2800000	3439	5+	Unfurnished	9	Freehold	na	na	Shahir Zainuldin	https://www.durianproperty.com.my/classified/3007594/Section-7-Semi-D-for-sale-by-Shahir-Zainuldin	Tell Shahir Zainuldin you saw this ad from DurianProperty to get best deal.2 STOREY SEMI D SEKSYEN7 SHAH ALAM Type of Property: 2 Storey Semi D Tenure: Leasehold Status: Bumilot Built up: Approx 3,439 sq ft Land Area: Approx 4,552 sqft Rooms: 9 Bathrooms: 7 0thers: Renovate Kitchen ASKING PRICE: RM 2,800 000 NEGO AMENITIES: Hospital Shah Alam AVISENA Medical Centre Icity Shah Alam Giant Seksyen 7…	2021-10-11	Section 7	Shah Alam	Durian	Semi D	Section 7, Shah Alam - Semi D For Sale	na	-1	-1	na	-1	-1	-1	-1	-1	-1	https://cdn.durianproperty.com.my/images/classified_ads/300759411740673.jpeg
600000	2200	3	Partly Furnished	4	Freehold	2	REN No.: 30501	Ezad Property	https://www.durianproperty.com.my/classified/3034645/Taman-Bandar-Senawang-Bungalow-House-for-sale-by-Ezad-Property	Tell Ezad Property you saw this ad from DurianProperty to get best deal.1 Storey Bungalow D'VENEA Bandar Baru Senawang For Sale PROPERTY DETAILS : ================= - Freehold - Non Bumi Lot - Land Area : 3681 sqft - Built up: 2200 sqft - 4 Bedrooms - 3 Bathroom - 1 utility Room - Full house wallpaper,plaster ceiling and grill - Master bedroom customised king bed with bed head design, built in wa…	2021-10-11	Taman Bandar Senawang	Senawang	Durian	Bungalow House	Taman Bandar Senawang, Senawang - Bungalow House For Sale	na	-1	-1	na	3681	-1	-1	162.999	-1	-1	https://cdn.durianproperty.com.my/images/classified_ads/303464511931076.jpg
399999	1089	2	Partly Furnished	3	Freehold	na	na	Marcuslee	https://www.durianproperty.com.my/classified/3006900/Selayang-Point-Condo-for-sale-by-Marcuslee	Tell Marcuslee you saw this ad from DurianProperty to get best deal.Property Details ^^^^^^^^^^^^^^^^^ - 1089sf Selayang Point, Selayang #Condominium # 1089sf # 3 rooms # 2 bathroom # Freehold # Non Bumi Lot # RENOVATED Special Arrangement For Those: -FULL LOAN - LOW DOWNPAYMENT -1ST HOUSE AND 100% LOAN -CASH BACK Call Marcus Lee For Viewing @ 0172025515 Call Marcus Lee For Viewing @ 0172025515 C…	2021-10-11	Selayang Point	Batu Caves	Durian	Condo	Selayang Point, Batu Caves - Condo For Sale	na	-1	-1	na	-1	-1	-1	-1	-1	-1	https://cdn.durianproperty.com.my/images/classified_ads/300690011735647.jpg
360000	1259	2	Partly Furnished	3	Leasehold	1	REN No.: 15525	Jimmy Goh	https://www.durianproperty.com.my/classified/2821198/Ampang-Damai-Condo-for-sale-by-Jimmy-Goh	Tell Jimmy Goh you saw this ad from DurianProperty to get best deal.Ampang Damai Condo Bandar Baru Ampang (Q 1948) @ Built UP: 1,259 sf @ 3r 2b @ 1 Car Park @ Kitchen Carbinet Nearby to: - Taman Kosas - Ampang Mewah - Taman Bukit Ampang - Pandan Cahaya Walking distance to Plaza Ampang Jaya ~ Public transport such as LRT Ampang Station, Bus Taxi. ~ Few Bank locate nearby ~ Restaurants & Cafes KFC,…	2021-10-11	Ampang Damai	Ampang	Durian	Condo	Ampang Damai, Ampang - Condo For Sale	Vacant	-1	-1	na	-1	-1	-1	-1	-1	-1	https://cdn.durianproperty.com.my/images/classified_ads/282119810649398.jpg
398000	1011	2	Fully Furnished	3	Freehold	2	na	Azie Amylia	https://www.durianproperty.com.my/classified/3027314/Puncak-Hijauan-Apartment-for-sale-by-Azie-Amylia	Tell Azie Amylia you saw this ad from DurianProperty to get best deal.~ Fully Furnished ~ Free Legal Fees on SPA and furnitures 1,011 sq ft Freehold Non Bumi Lot Bedrooms: 3 Bathrooms: 2 Carparks: 2 Kitchen Hob Grill at Maindoor and window 1 Air Conditioner 4 Ceiling Fan 1 Water Heater Balcony Facing Morning Sun Maintenance & sinking Fund RM 317.79 *FACILITIES & AMENITIES* Mini Market Playground …	2021-10-11	Puncak Hijauan	Taman Universiti	Durian	Apartment	Puncak Hijauan, Taman Universiti - Apartment For Sale	na	-1	-1	na	-1	-1	-1	-1	-1	-1	https://cdn.durianproperty.com.my/images/classified_ads/302731411881421.jpg
[truncated: 12,401 more rows]
